# Supplementary material for: Widely Targeted HPLC-MS/MS Metabolomics Analysis Reveals Natural Metabolic Insights in Insects
Source: MDPI journal article supplement (doi:10.3390/metabo13060735), 2023-06-08
Supplement: s1 [file s1]

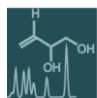

---

**Supplementary Materials for**

# **Widely Targeted HPLC-MS/MS Metabolomics Analysis Reveals Natural Metabolic Insights in Insects**

Zhaoxin Li <sup>1,2,3</sup>, Yunlong Cheng <sup>1</sup>, Jinxin Chen <sup>1</sup>, Weijun Xu <sup>1</sup>, Wentao Ma <sup>1</sup>, Sheng Li <sup>1,2,3</sup>, and Erxia Du <sup>1,2,3,\*</sup>

**Supplementary materials:**

Figure. S1 to S6

Table S1

## Figures

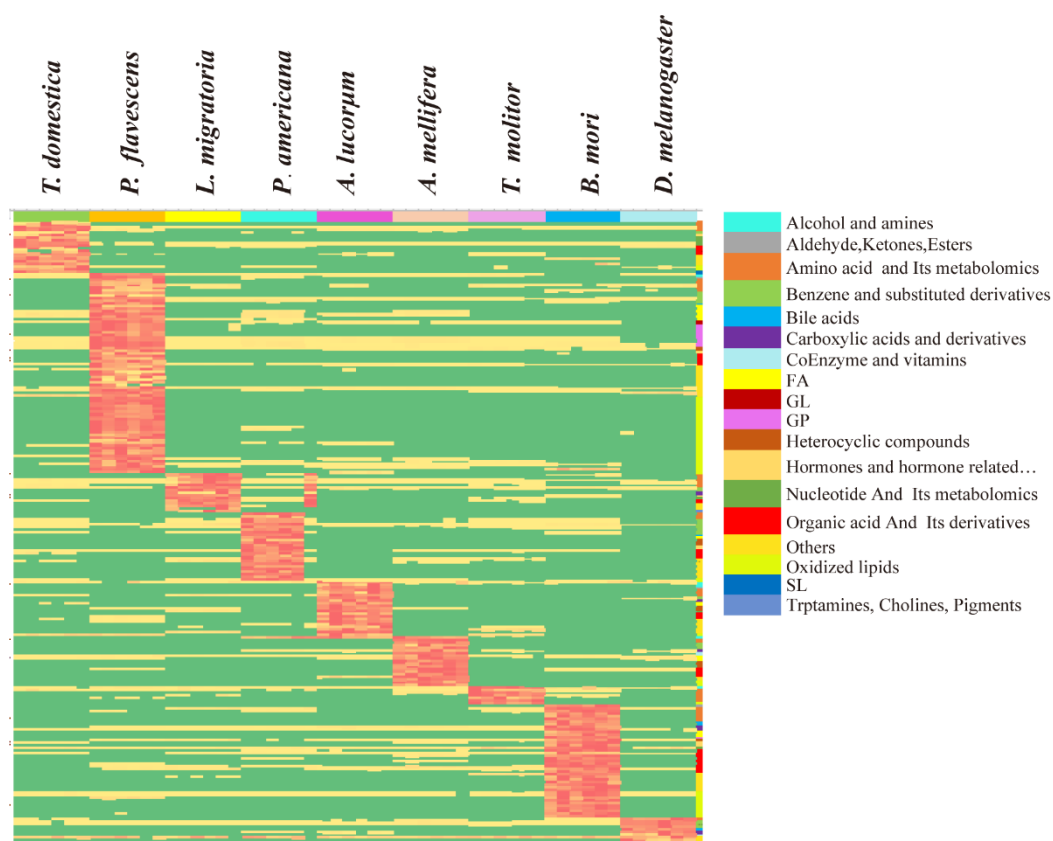

**Figure S1. The species-specific differential metabolites among the species.** The differential metabolites of one species was compared to each of the other 8 species to obtain 8 groups. The intersection among the 8 groups were selected to generate the specific metabolites expression pattern in one species.

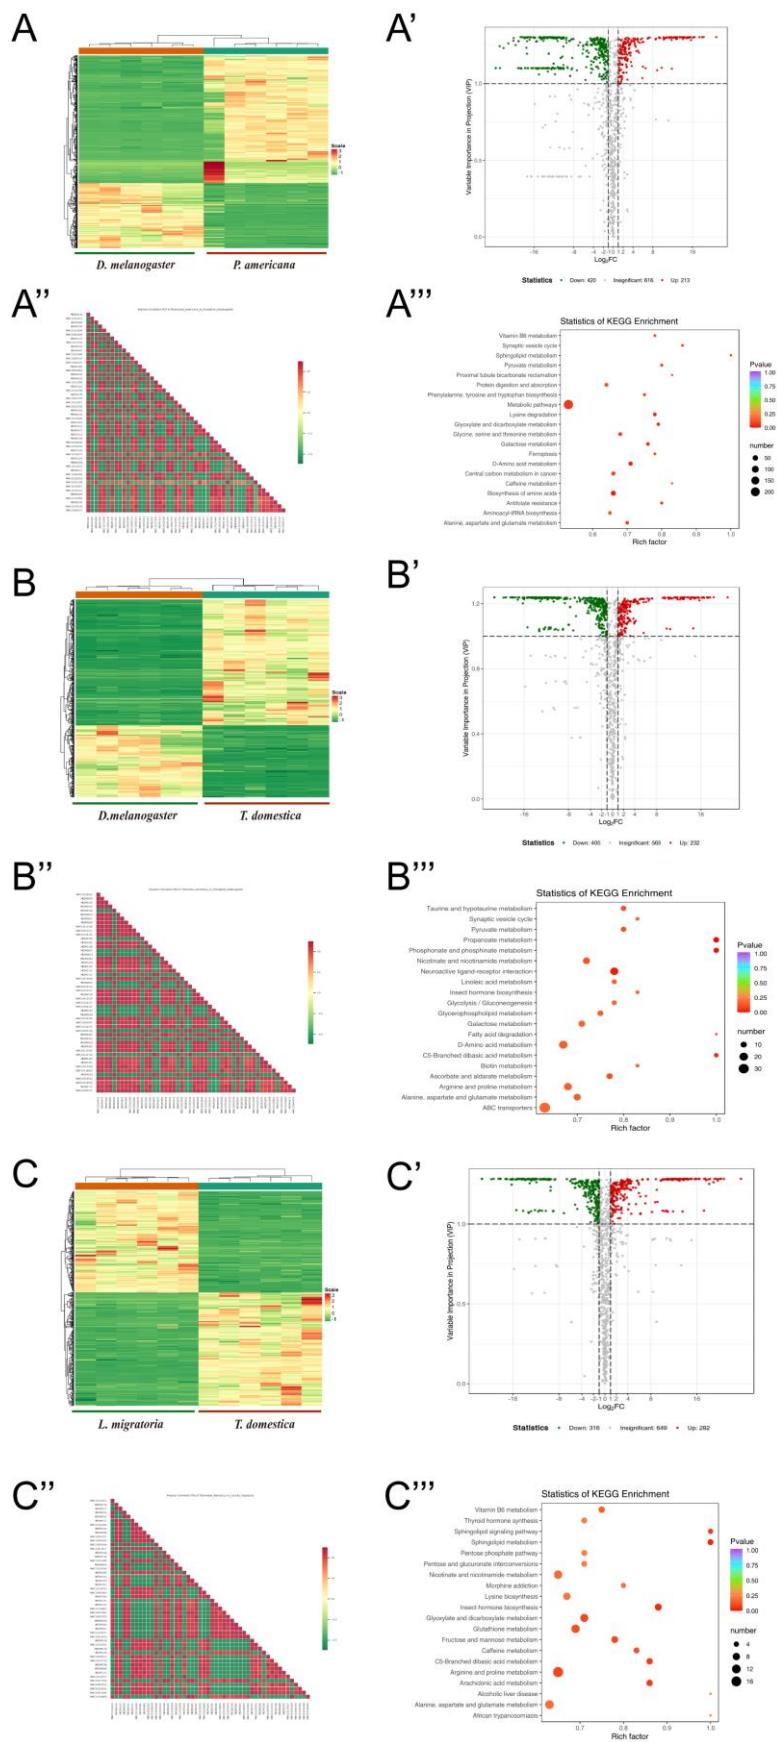

**Figure S2.** Heatmap, volcano plot, Pearson correlation plot, and KEGG enrichment of the metabolites between *D. melanogaster* vs *P. americana* (A-A'''), *D. melanogaster* vs *T. domestica* (B-B'''), *L. migratoria* vs *T. domestica* (C-C''').

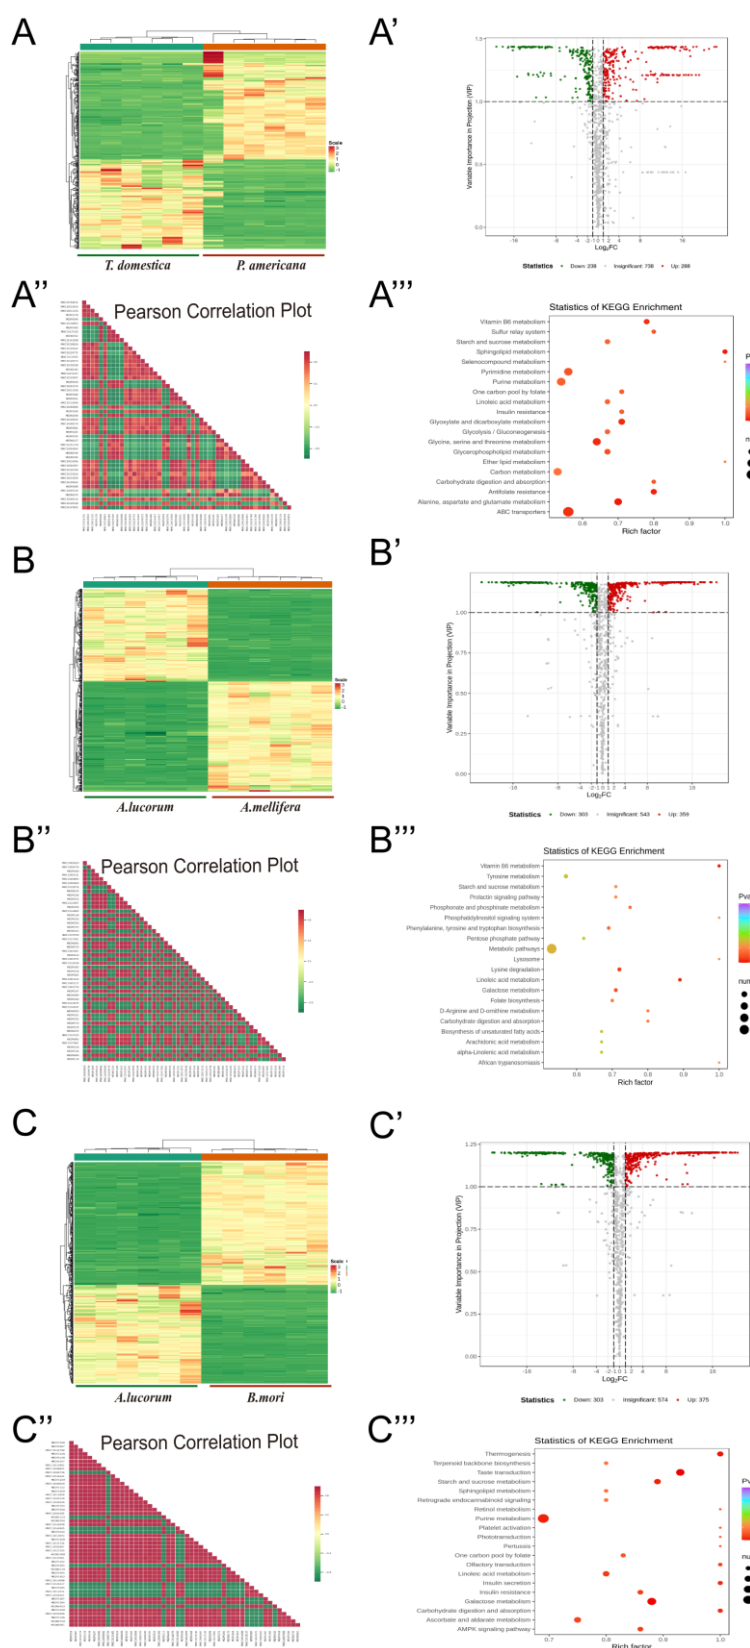

**Figure S3.** Heatmap, volcano plot, Pearson correlation plot, and KEGG enrichment of the metabolites between *T. domestica* vs *P. americana* (A-A'''), *A. lucorum* vs *A. mellifera* (B-B'''), *A. lucorum* vs *B. mori* (C-C''').

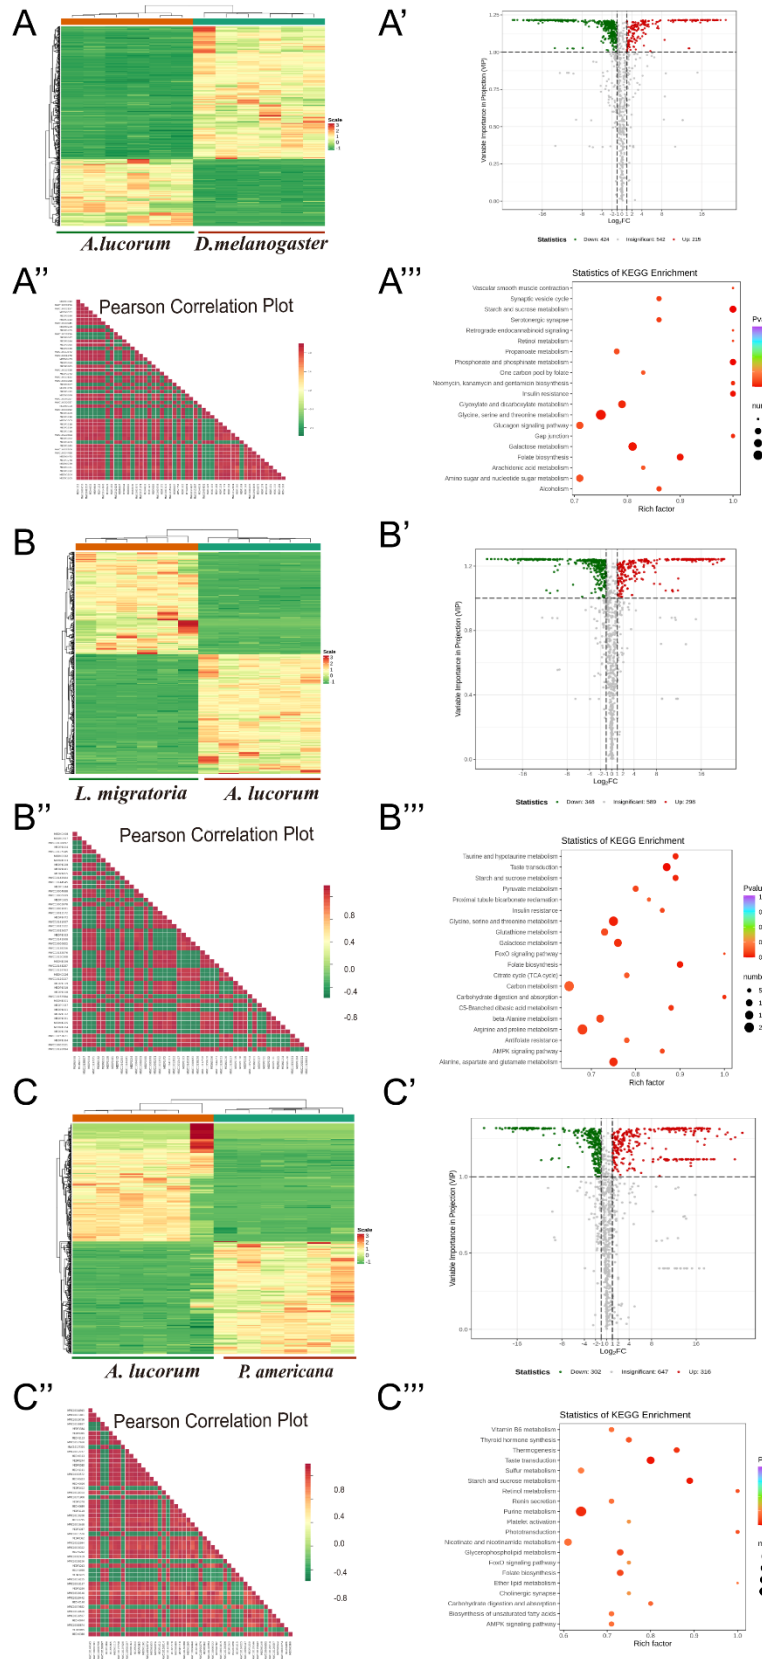

**Figure S4.** Heatmap, volcano plot, Pearson correlation plot, and KEGG enrichment of the metabolites between *A. lucorum* vs *D. melanogaster* (A-A'''), *L. migratoria* vs *A. lucorum* (B-B'''), *A. lucorum* vs *P. americana* (C-C''').

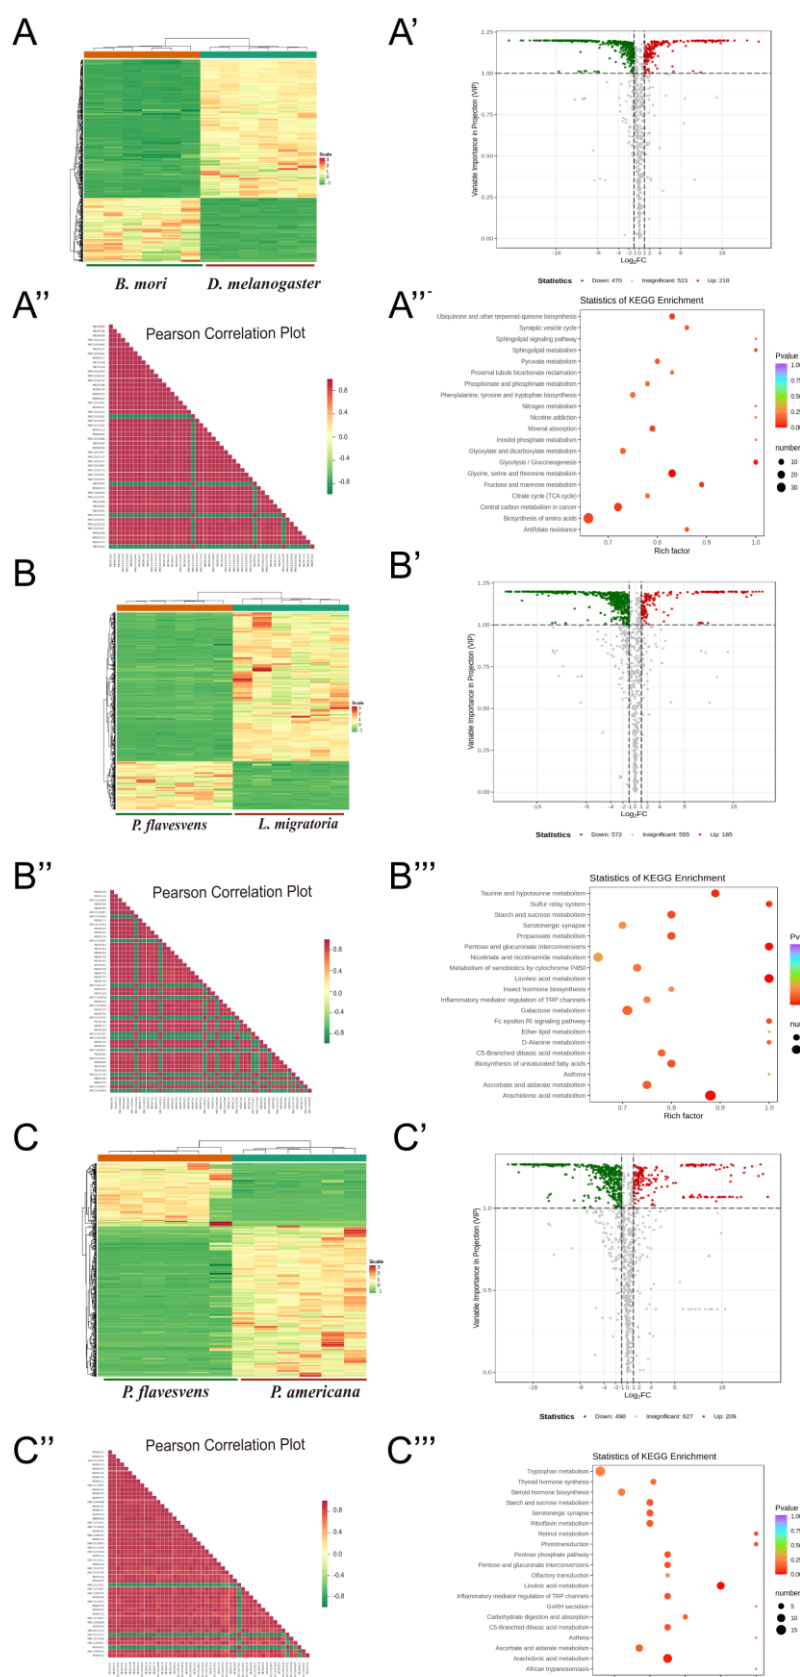

**Figure S5.** Heatmap, volcano plot, Pearson correlation plot, and KEGG enrichment of the metabolites between *B. mori* vs *D. melanogaster* (A-A''), *P. flavescens* vs *L. migratoria* (B-B''), *P. flavescens* vs *P. americana* (C-C'').

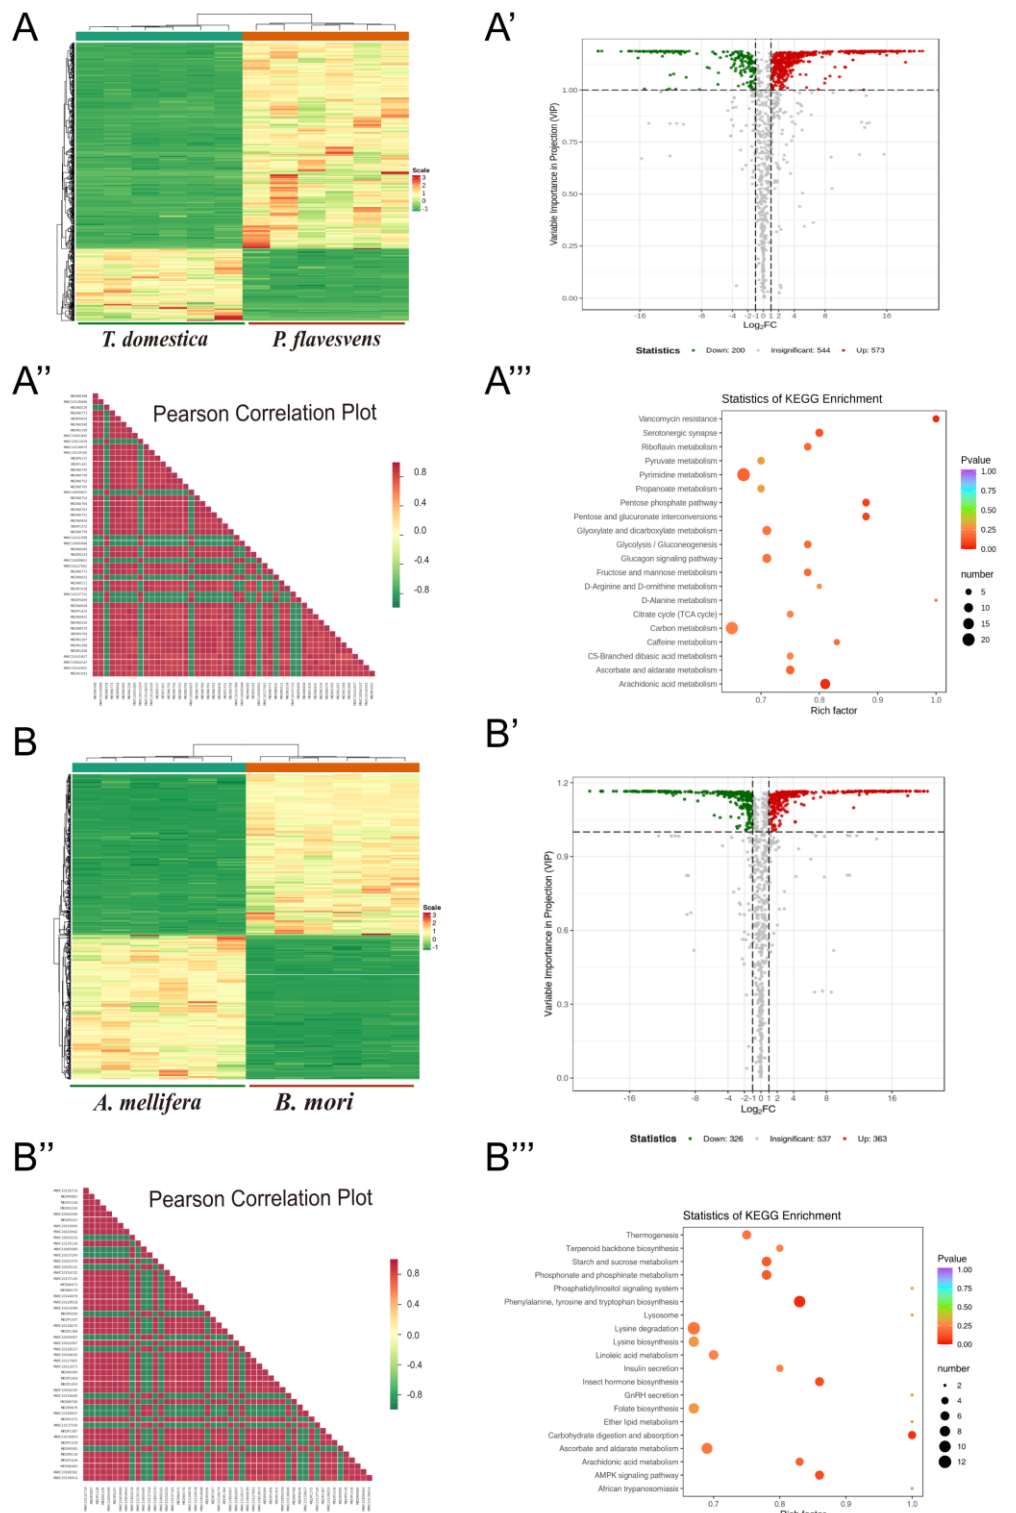

**Figure S6.** Heatmap, volcano plot, Pearson correlation plot, and KEGG enrichment of the metabolites between *T. domestica* vs *P. flavescens* (A-A'''), *A. mellifera* vs *B. mori* (B-B''').
