# Supplementary material for: Widely Targeted HPLC-MS/MS Metabolomics Analysis Reveals Natural Metabolic Insights in Insects
Source: Metabolites. 2023 Jun 8;13(6):735. doi: 10.3390/metabo13060735 (PMC10301993; doi:10.3390/metabo13060735)
Supplement: Supplementary file 1 [file metabolites-13-00735-s001.zip › Table 1 All the metabolites (1442) identified in insects.xlsx]

## Sheet: metabolites
Index	Compounds	Class I	Class II	Q1 (Da)	Molecular Weight (Da)	Ionization model	Formula	Level	Thermobia_domestica-1	Thermobia_domestica-2	Thermobia_domestica-3	Thermobia_domestica-4	Thermobia_domestica-5	Thermobia_domestica-6	Calopteryx_splendens-1	Calopteryx_splendens-2	Calopteryx_splendens-3	Calopteryx_splendens-4	Calopteryx_splendens-5	Calopteryx_splendens-6	Locusta_migratoria-1	Locusta_migratoria-2	Locusta_migratoria-3	Locusta_migratoria-4	Locusta_migratoria-5	Locusta_migratoria-6	Periplaneta_americana-1	Periplaneta_americana-2	Periplaneta_americana-3	Periplaneta_americana-4	Periplaneta_americana-5	Periplaneta_americana-6	Apolygus_lucorum-1	Apolygus_lucorum-2	Apolygus_lucorum-3	Apolygus_lucorum-4	Apolygus_lucorum-5	Apolygus_lucorum-6	Apis_mellifera-1	Apis_mellifera-2	Apis_mellifera-3	Apis_mellifera-4	Apis_mellifera-5	Apis_mellifera-6	Tenebrio_molitor-1	Tenebrio_molitor-2	Tenebrio_molitor-3	Tenebrio_molitor-4	Tenebrio_molitor-5
MEDN0632	N-Oleoyl Glycine	Alcohol and amines	Amines	338.27	339.277	[M-H]-	C20H37NO3	A	22628	22664	25173	32197	27743	19778	9	9	9	9	9	9	42146	22531	17320	21692	19993	19864	19612	19351	18316	15873	18066	20544	8080.7	4277.3	4580.4	7180.8	6137.4	7842.1	18961	16883	13952	12171	16534	15268	19518	17139	15094	14539	18508
MEDN0682	Octadecanamide	Alcohol and amines	Amines	282.28	283.288	[M-H]-	C18H37NO	B	28230	30195	28431	35598	26977	30295	28045	22427	21678	36487	34355	26867	37172	25702	21459	26545	36724	23799	29904	26016	23614	35193	34047	26334	36591	46031	23807	36467	41166	38118	38662	31833	35248	27144	27817	28351	33440	32910	29534	24168	33607
MEDN0721	2-Methyl-5-nitroimidazole-1-ethanol	Alcohol and amines	Alcohols	170.057	171.064	[M-H]-	C6H9N3O3	A	365350	149440	173750	213610	234830	358060	239660	189020	287560	218830	213320	139890	65552	90387	63585	68016	51662	55872	81488	103410	77115	72207	130910	119090	33170	9	70695	38824	9	37018	207500	108120	290420	296190	183400	122520	201910	140820	177930	114150	77239
MEDN0736	2-(Methylthio)ethanol	Alcohol and amines	Alcohols	91.0218	92.0296	[M-H]-	C3H8OS	A	68036	106970	157270	60027	75428	87459	26477	64716	24978	28688	35302	32612	97228	76939	87809	53764	72020	70844	72086	99278	76498	90284	70370	106340	56848	71226	73037	71122	96671	73665	92384	69977	76559	70800	110370	84284	108880	84129	91985	87438	84028
MEDN1135	Heparin	Alcohol and amines	Alcohols	315.29	316.298	[M-H]-	C19H40O3	B	62749	59411	38715	53322	56147	53590	70412	47835	128880	56762	59799	54471	9	9	9	9	9	9	74574	64539	63215	77552	96977	55882	59788	192560	42478	53059	78442	57843	42179	48427	98170	38589	32693	43046	50235	82806	44832	47269	50166
MEDN1224	Bis(1-inositol) -3,1'-phosphate 1-phosphate	Alcohol and amines	Alcohols	501	502.049	[M-H]-	C12H24O17P2	A	3734500	3958400	3151600	3028800	3394000	3524000	3051900	4216300	2440700	3303000	3482600	3379200	3346400	4201900	4351800	4055600	3984000	4048400	5151400	4796900	4871700	4941400	4828400	4293100	4607000	5618100	5070700	5326900	4626600	5725300	6963300	5650800	6370000	7202300	5555900	5886700	2667300	2613300	2556800	3481500	3560300
MEDN1241	2-(α-D-mannosyl) -3-phosphate glyceride	Alcohol and amines	Amines	347.038	348.046	[M-H]-	C9H17O12P	B	5952400	16619000	18828000	13563000	14328000	9119200	64608000	45590000	49472000	40726000	55829000	59881000	588500	347130	466400	408750	454850	773630	949250	1239500	1295100	1648300	1561400	467240	10556000	16469000	15549000	10749000	19136000	16428000	7326800	16452000	13777000	15827000	19413000	14659000	3330400	2085900	3572100	4626200	3646800
MEDN1302	D-inositol-1,4-diphosphate	Alcohol and amines	Alcohols	338.988	339.996	[M-H]-	C6H14O12P2	A	745360	502530	806520	412580	474200	1317200	1513400	5652800	2803300	3191900	3271000	3831700	1375000	2201500	1941000	1664200	2143400	1476200	4785900	3461700	3572300	3864500	4761900	2640800	1143400	1720700	1594700	589680	879620	780790	17074000	5551900	12083000	10339000	6468500	7141000	957620	933220	596130	830500	830940
MEDP0047	Histamine	Alcohol and amines	Polyamines	112.08	111.08	[M+H]+	C5H9N3	A	3766900	6539400	2913800	1703000	3522800	5179300	69294000	45821000	71306000	52375000	54111000	55314000	799780	720520	1744600	1233600	1805300	549140	4045700	2689900	3064900	2481000	1357300	765700	1606500	2105500	2051700	2094700	8464500	2244900	4304800	5973700	5380000	6130500	5581600	5581800	690150	450360	781100	789800	522230
MEDP0084	Trimethylamine N-Oxide	Alcohol and amines	Amines	76	75.0684	[M+H]+	C3H9NO	A	48452	50358	37841	50035	69944	55937	9	9	9	9	9	9	9	9	9	9	9	9	9	9	9	9	9	9	5477	13045	8484	11647	13111	16249	65752	70585	88584	146950	74984	86711	3084.8	1724.4	674.22	3723	9
MEDP0086	Urea	Alcohol and amines	Amines	61	60.032	[M+H]+	CH4N2O	A	39832	48044	42770	50655	27509	18457	498830	304550	590460	476860	413390	311750	65865	647000	247770	127180	294390	242750	223730	206050	168670	167450	200040	560920	80057	278070	100060	40458	150560	68470	257450	356750	445080	225980	287050	268600	9643300	8668400	8870100	9594000	7738500
MEDP0089	N-Acetylhistamine	Alcohol and amines	Amines	154.1	153.1	[M+H]+	C7H11N3O	B	51836	99674	59803	34492	53328	9	9	9	9	9	9	9	9	9	9	9	164340	74033	1747200	13121000	2134500	2372100	1593200	9	346630	446380	174030	332820	235240	267580	298130	186040	302170	301180	225730	228940	9	9	9	9	9
MEDP0126	1,5-Diaminopentane	Alcohol and amines	Polyamines	103	102.116	[M+H]+	C5H14N2	A	9	9	9	8599.6	4661	5301.3	163120	57547	92009	10747	32802	68055	359370	212800	219070	164550	170880	201640	5351.7	14156	7348.5	11450	2903	193980	12006	13408	14614	19188	19013	15204	515240	564820	518160	574590	606530	575110	16401	39651	42157	18307	42156
MEDP0127	Putrescine	Alcohol and amines	Polyamines	89	88.1	[M+H]+	C4H12N2	B	9	9	9	9	9	9	2844700	3840700	1920700	896800	2206600	1411700	125380000	114320000	104610000	114790000	122550000	136080000	1882900	2289900	1963300	1807600	2551700	112220000	3405400	3963400	2778200	3691800	2146300	2903600	149830000	162700000	169940000	166590000	173450000	160500000	11050000	12861000	17917000	11943000	13436000
MEDP0129	Phenethylamine	Alcohol and amines	Amines	122.1	121.089	[M+H]+	C8H11N	B	9	9	9	9	9	9	2558600	181990	2282800	387390	2737300	879780	169390	253400	120600	67850	114600	460280	9	102200	9	9	9	266310	9	9	9	9	9	9	312170	49973	300590	66978	89314	47349	9	9	9	9	9
MEDP0281	1,3-Diaminopropane	Alcohol and amines	Amines	75	74.084	[M+H]+	C3H10N2	A	135560	156840	175750	184580	151910	135260	239880	257110	243410	160280	193960	172660	223130	275840	268690	275750	266930	527930	154700	158890	165520	182340	174170	268840	135320	160360	141700	134390	130630	135240	285440	223010	271300	228240	251890	263450	287530	310550	300250	259860	218540
MEDP0601	Spermidine	Alcohol and amines	Polyamines	146.158	145.158	[M+H]+	C7H19N3	A	4866300	5878000	5680200	7335000	4661400	3564400	7462600	6262500	3934600	3119000	4490200	5372000	14902000	15518000	13331000	14314000	13839000	11879000	6448100	7513300	6828300	7324700	7874700	16133000	6881600	10844000	6669600	7862600	3253000	5444600	26851000	20962000	25589000	20289000	23183000	23579000	10190000	10196000	12171000	9307500	7266000
MEDP0658	Ethyl dodecanoate	Alcohol and amines	Amines	229.1	228.209	[M+H]+	C14H28O2	A	1884600	1950400	2065500	1931200	2026000	2020900	1857900	1771500	2020200	2057400	1999200	1791400	2276500	2100700	2008400	2061300	1995100	1957400	2094300	2170400	2179200	2141400	2189000	1658500	1497400	2071000	2091400	2180100	1639400	1619700	1998000	1988800	1972900	1988900	2170600	2107500	2109900	2270600	2216200	1846600	1912000
MEDP0672	Cyclohexylamine	Alcohol and amines	Amines	99.9	99.1048	[M+H]+	C6H13N	A	9	9	9	9	9	9	9	9	9	9	9	9	49803	33263	63036	47332	33936	35042	9	9	9	9	9	9	53826	19070	44201	44760	54966	54076	48309	36344	50545	68757	70994	57279	36092	32339	40477	27062	34728
MEDP0677	Butylamine	Alcohol and amines	Amines	74.1	73.0891	[M+H]+	C4H11N	A	137280	221640	265950	306690	375040	418190	410010	425280	597100	310000	464290	514310	266870	320150	217470	303020	257380	216580	1179100	1567700	1419600	1582900	1317200	277740	496850	430210	574240	532720	543880	704280	170770	111200	176940	139720	150230	147630	156480	257050	241980	399780	143320
MEDP0681	2,2,2-Trichloroethanol	Alcohol and amines	Alcohols	149.2	147.925	[M+H]+	C2H3Cl3O	A	7466400	7879700	7523700	6498400	7292200	8074600	5938200	5603700	6021200	8153300	6279200	5718000	9235000	8968100	8471700	9381900	8508900	8698800	8409100	7877800	8146000	8362900	8950000	9772200	12677000	12051000	11483000	12177000	9509300	10986000	3795600	2996900	3231700	3176800	3460600	3987200	10418000	8967100	10790000	8337700	8178900
MEDP0765	3-(Methylthio)-1-propanol	Alcohol and amines	Alcohols	107.045	106.045	[M+H]+	C4H10OS	B	9	9	9	9	9	9	186900	89010	139800	139730	146370	139120	9	9	9	9	9	9	148740	206350	107720	153440	163910	59715	9	9	9	9	9	9	311680	267720	245590	251290	235780	207690	9	9	9	9	9
MEDP0831	1-Aminopropan-2-ol	Alcohol and amines	Alcohols	76	75.0684	[M+H]+	C3H9NO	B	48452	50358	37841	50035	69944	55937	9	9	9	9	9	9	9	9	9	9	9	9	9	9	9	9	9	9	5477	13045	8484	11647	13111	16249	65752	70585	88584	146950	74984	86711	3084.8	1724.4	674.22	3723	9
MEDP0844	Furfuryl alcohol	Alcohol and amines	Alcohols	99	98.0368	[M+H]+	C5H6O2	B	1421200	1579600	1296800	1216500	1299600	1410000	888040	1022900	745400	825800	768670	819270	749920	783120	1030100	821010	783090	831270	1206800	1061600	1041500	1216400	1241600	726840	1173300	2741500	1372400	1539100	1224600	1680100	763260	600520	755920	762380	526150	595450	738220	742240	712490	1036500	1183400
MEDP1002	Acetylcholine	Alcohol and amines	Polyamines	146.108	145.11	[M+H]+	C7H15NO2	A	1541400	1515000	658240	875730	1183400	1188900	36782000	33763000	34328000	37482000	37952000	36669000	589060	651100	586260	831520	608480	358470	2549500	2182700	3167100	2456900	2758500	678250	241370	255600	234260	228990	354930	290250	456880	613570	528680	493710	501370	556570	149470	155390	113520	146470	133270
MEDP1007	Dopamine	Alcohol and amines	Polyamines	154.086	153.079	[M+H]+	C8H11NO2	A	9	9	9	9	9	9	91236	54066	46074	54812	62747	31204	8502.7	30120	15242	21934	68458	35773	877250	5670900	990100	1107200	825770	23698	68742	73954	52900	47161	94502	71034	228110	174890	196920	253620	194020	142370	182730	108190	106080	121750	88485
MEDP1040	N-(2-hydroxyethyl)stearamide	Alcohol and amines	Amines	328.319	327.314	[M+H]+	C20H41NO2	A	17297	21975	20078	16234	34495	14287	67764	68927	53347	38251	46972	40261	12295	16583	16213	12500	15421	20541	14883	16158	15006	16004	22421	19904	14909	17930	31946	12657	9859.8	13208	174630	42428	118000	56694	38372	33858	32448	28707	36180	15852	22238
MEDP1052	N, N-diacetyl-O-methylhydroxylamine	Alcohol and amines	Polyamines	132.058	131.058	[M+H]+	C5H9NO3	A	81421000	91303000	76928000	87877000	94591000	87442000	44340000	40491000	69855000	30092000	41840000	44168000	69751000	109030000	69145000	84677000	70981000	73010000	89829000	102510000	106460000	95206000	101000000	103250000	52277000	60995000	43164000	39780000	52838000	54212000	34682000	31810000	35777000	29235000	34284000	28787000	65402000	83894000	78464000	83201000	61513000
MEDP1067	Palmitoyl N-isopropylamide	Alcohol and amines	Amines	320.298	297.303	[M+Na]+	C19H39NO	B	508560	344470	259620	240330	329430	471370	253100	169730	167190	331890	212220	169410	344830	334040	268340	271460	309870	340450	226290	202430	296710	297440	284060	289170	326810	610990	338540	348910	331030	376950	368690	274850	287380	224800	249060	262760	376430	332470	349520	367920	352980
MEDP1131	Arachidyl glycine	Alcohol and amines	Amines	352.317	369.324	[M-H2O+H]+	C22H43NO3	B	68317	71975	72807	81209	31773	54885	108850	124590	127080	158090	147700	158970	80893	97545	86340	84579	114290	71152	67837	63412	74352	97913	117800	113530	117530	181080	106870	63301	90732	90879	80282	99263	81517	90600	137090	96815	153910	126410	75379	42897	98024
MEDP1138	1-methylhistamine	Alcohol and amines	Polyamines	126.101	125.095	[M+H]+	C6H13Cl2N3	A	40398	61662	46672	47444	59733	45612	149230	108910	67150	89252	88284	105820	37611	51150	44843	38260	41588	64519	17531	50220	44212	42558	25824	46413	50511	40980	55383	42666	40002	30232	72738	130620	99084	134680	145960	96807	59625	54543	61386	51334	38883
MEDP1163	Palmitoyl-EA	Alcohol and amines	Amines	298.3	297.267	[M+H]+	C18H35NO2	A	9	9	9	9	9	9	99143	165820	105100	63405	81400	122090	9	9	9	9	9	9	9	9	9	9	9	9	3218.9	1296.5	24727	2200.2	2288.6	1466.1	19168	7439.9	15495	4589.4	4855.2	4315.7	5380.8	7010	9088.1	4037.1	7382.9
MEDP1178	Methylamine	Alcohol and amines	Amines	141.1	140.106	[M+H]+	C6H12N4	A	1647400	1664500	1637000	1652400	1657700	1652200	1658900	1635100	1693800	1679200	1644100	1639000	2140600	2104000	2061200	2069700	2078900	2041200	1814100	1779900	1764100	1797800	1823900	1789900	1868200	1843700	1864500	1903500	1911600	1909300	1567100	1594400	1607600	1562400	1532200	1568000	2363400	2359200	2333200	2354800	2295200
MEDP1183	N-Acetylcadaverine	Alcohol and amines	Polyamines	145.1	144.126	[M+H]+	C7H16N2O	B	339600	303070	295360	227500	270830	348740	38720000	42981000	9307500	12104000	18865000	32247000	247060	432120	379940	339000	313430	318210	330940	318870	464990	338630	400070	380380	277160	390350	420140	425360	454340	586210	14031000	15445000	15742000	17875000	22724000	14471000	699640	564050	557870	487360	462340
MEDP1196	Biotinamide	Alcohol and amines	Polyamines	244.108	243.104	[M+H]+	C10H17N3O2S	B	30169	48173	38873	18871	49940	36608	5243400	3679300	3598800	3412400	4276200	3026100	156520	239020	201690	171020	193440	142950	46960	52680	19701	30649	42271	224180	21022	30159	16191	19151	17706	15723	22463	9424.7	19370	25157	38842	26045	108290	171240	156960	169490	88022
MEDP1197	Hypotaurocyamine	Alcohol and amines	Polyamines	152	151.042	[M+H]+	C3H9N3O2S	A	4017900	17062000	6555200	4420600	8535100	2541900	3466900	3324100	6745700	3031100	3373300	4092000	821650	713050	408710	625790	957870	671490	5722100	5464800	4192300	6644100	4517800	705040	29741000	25336000	22937000	29565000	24426000	24137000	4283200	4104600	5472700	5091900	5320900	4859800	4750200	6267700	4927100	3204500	3058900
MEDP1212	1,3-Dicyclohexylurea	Alcohol and amines	Polyamines	225.196	224.189	[M+H]+	C13H24N2O	A	1050300	1059000	1084100	1136600	1110800	1166700	1165000	1124500	1081700	1110600	1089100	1060700	1328800	1331800	1224700	1276000	1218000	1245200	1259800	1315300	1286400	1266300	1278900	1168200	1236900	1291400	1233600	1296300	1309500	1283500	1122600	1088000	1147300	1061800	1076200	1075000	1358600	1454700	1392300	1358900	1430400
MEDP1278	4-methyl-5-thiazole ethanol	Alcohol and amines	Alcohols	144.047	143.041	[M+H]+	C6H9NOS	B	47391	88143	106210	72041	57853	78075	9	9	9	9	9	9	9	9	9	9	9	9	9	9	9	9	9	9	297430	307840	326840	353490	344220	209350	9	9	9	9	9	9	9	9	9	9	9
MEDP1298	Pregnanetriol	Alcohol and amines	Alcohols	337.273	336.266	[M+H]+	C21H36O3	A	1388400	1061400	1262900	1200600	1513500	1895100	6853600	5700200	6330200	6419500	5484700	6654800	382080	990490	1763900	1722200	1540400	1736100	1649100	1614100	1791700	1363400	2083000	1137400	4494500	6704500	5996700	5267500	5131000	4596700	870330	999750	1081600	1209800	944420	749960	1037300	1072100	1153700	1005000	1339800
MEDP1446	Octadecadienamide	Alcohol and amines	Amines	280.264	279.256	[M+H]+	C18H33NO	B	252250	62579	93710	102450	142870	97218	168150	155220	69939	143820	128380	120350	151840	57140	53194	138780	142440	186280	133170	153580	175320	106200	105080	117980	183980	107850	119760	120420	70970	56008	81366	47301	166000	86387	100240	79352	90962	148820	97908	32089	66048
MEDP1464	1,3-Diphenylguanidine	Alcohol and amines	Polyamines	212.1	211.111	[M+H]+	C13H13N3	A	189240	103660	96458	113090	138980	253570	28391	9	9	1218800	22081	24779	79229	71311	45893	41604	41966	431670	34111	19110	52717	56599	387950	50693	4475400	4894800	2843400	2456700	3678800	4275100	48020	103610	22557	40946	61118	1207000	86580	34626	74932	117730	39882
MEDP1465	(2S,3S)-butane-2,3-diol	Alcohol and amines	Alcohols	73.064	90.0681	[M-H2O+H]+	C4H10O2	B	582960	872170	872890	954140	841570	854210	872030	615060	1118200	556390	842830	901230	671780	1090100	664760	1097400	829750	609800	1147300	1428300	1634000	1370900	1361400	1187200	1429100	1623300	1488600	1117900	1760000	1861700	393300	202690	356810	294940	217450	271630	1748300	1625000	1129800	1535800	1475900
MEDP1468	D-panthenol	Alcohol and amines	Alcohols	206	205.25	[M+H]+	C9H19NO4	B	9	9	9	9	9	9	9	9	9	9	9	9	9	9	9	9	9	9	5263.6	4343.2	7700.7	8225.6	13931	13049	13985	16674	8547.1	8758.8	5763.8	6013.2	17703	12304	11587	8690.5	7239.5	8432.8	9	9	9	9	9
MEDP1476	5-Methoxytryptamine	Alcohol and amines	Amines	191	190.111	[M+H]+	C11H14N2O	A	154760	151410	156590	154480	175040	180190	21068	53265	82687	25210	82807	58875	100040	102400	113900	114330	137050	91792	206410	154320	175520	196850	229230	145900	73126	96949	61732	35403	69983	32205	139940	153890	104160	157550	192780	129560	195330	222230	218240	260050	266890
MEDP1494	N-Acetyl-D-Galactosamine	Alcohol and amines	Amines	222	221.09	[M+H]+	C8H15NO6	B	26858	43178	173420	99377	110480	43788	132120	83789	66447	35462	55176	50806	52669	52615	76954	68557	47917	41176	16912	37104	18659	39424	37205	57859	9	9	9	9	9	9	202000	169230	153540	137350	136030	150050	9	9	9	9	9
MWC10008280	ANISODAMINE	Alcohol and amines	Amines	306.172	305.163	[M+H]+	C17H23NO4	B	9	9	9	9	9	9	9	9	9	9	9	9	9	9	9	9	9	9	9	9	9	9	9	9	144410	397140	179090	76466	535250	294570	9	9	9	9	9	9	9	9	9	9	9
MEDN0226	D-Erythronolactone	Aldehyde,Ketones,Esters	Esters	117.019	118.027	[M-H]-	C4H6O4	B	1552800	1624200	1403300	1478300	1669400	1429800	9	9	9	9	9	9	854910	662590	738250	685610	516730	906840	9	9	9	15914	13932	813900	9	9	9	9	9	9	21813	31501	28955	36310	47750	50702	1096000	980320	1332400	1431600	1532000
MEDN0673	Isopropyl myristate	Aldehyde,Ketones,Esters	Esters	269.248	270.256	[M-H]-	C17H34O2	B	176410	166620	172440	180860	175440	171860	192390	210790	203220	175620	183660	185520	177340	166160	158950	182790	163890	143570	190300	181890	190730	170020	187150	140150	195080	198410	192280	206820	216100	171410	200070	186230	181880	206130	188420	201150	188710	182480	188680	190130	182350
MEDN0835	D-Glucuronolactone	Aldehyde,Ketones,Esters	Esters	175.024	176.032	[M-H]-	C6H8O6	A	21653	3509.8	8896.4	12909	24342	7047.5	967650	171000	533070	135310	249440	94158	21021	29206	38263	33941	30481	40852	4385.9	14996	26144	16183	20358	40126	31547	32506	22007	21495	18136	20791	223360	107910	139710	172100	189170	165940	9	9	18410	15057	18068
MEDN1064	N-arachidene glycine	Aldehyde,Ketones,Esters	Esters	360.254	361.262	[M-H]-	C22H35NO3	B	3688.3	6066.5	3094.7	3155.5	2647.9	2689.8	129820	118270	123770	102300	100330	120610	9	9	9	9	9	9	2989	3401.7	3149	4224.8	3227.2	9	9	9	9	9	9	9	9	9	9	9	9	9	9	9	9	9	9
MEDN1119	Trans dehydrorosinone	Aldehyde,Ketones,Esters	Ketones	287.201	288.209	[M-H]-	C19H28O2	B	9	9	9	9	9	9	9	9	9	9	9	9	9	9	9	9	9	9	9	9	9	9	9	9	9	9	9	9	9	9	9	9	9	9	9	9	9	9	9	9	9
MEDN1230	Diethyl sulfate	Aldehyde,Ketones,Esters	Esters	153.022	154.03	[M-H]-	C4H10O4S	B	36328000	40746000	36366000	38738000	34265000	35013000	5255700	5888100	4967900	5896000	5123000	5004700	11876000	23247000	20633000	19567000	19525000	26487000	45906000	67813000	47287000	55072000	50190000	26517000	516680	475770	432170	522570	411200	369660	9	9	9	9	9	9	9	9	9	9	9
MEDP0631	Dimethyl fumarate	Aldehyde,Ketones,Esters	Esters	145.042	144.042	[M+H]+	C6H8O4	B	8850100	7445800	7242800	6432800	8014200	8929400	14721000	13463000	13365000	14781000	13667000	14318000	12492000	13008000	13260000	13088000	13038000	11901000	16992000	16627000	17490000	16532000	16805000	13084000	12317000	16092000	13291000	13601000	12492000	13011000	12386000	12106000	11788000	10645000	12117000	12042000	17232000	17005000	16455000	15889000	15203000
MEDP0676	Butyl 3-methylbutanoate	Aldehyde,Ketones,Esters	Esters	159.4	158.131	[M+H]+	C9H18O2	B	247130	259720	266070	237640	269930	277230	136770	122360	123470	163750	139840	155950	9	9	9	9	9	9	325100	273990	282480	269260	299340	208700	207710	183750	190100	154370	276970	275680	141390	117570	153610	123770	106680	126330	9	9	9	9	9
MEDP0695	Methyl tetradecanoate	Aldehyde,Ketones,Esters	Esters	243.5	242.225	[M+H]+	C15H30O2	A	61837	68165	51379	53002	61048	55543	67157	65413	53486	63155	68345	62116	83196	81334	65350	73498	83671	72260	75757	70144	70802	72970	71957	73607	80817	70520	72177	63738	81934	72449	54537	57125	51192	53821	61039	45858	88350	90926	77877	82578	81726
MEDP0709	Methyl dihydrojasmonate	Aldehyde,Ketones,Esters	Esters	227.3	226.312	[M+H]+	C13H22O3	A	1161800	1208700	1104100	1243700	1248400	1245100	1020300	1166900	1137900	1223800	1224900	1221000	1316600	1278200	1364300	1317500	1331600	1250600	1345300	1309800	1198300	1367600	1329700	1211500	1344100	1445200	1299600	1224500	1270000	1337400	1268800	1249800	1239100	1248800	1189900	1230600	1569000	1460000	1431100	1378400	1488000
MEDP0710	Hexyl butyrate	Aldehyde,Ketones,Esters	Esters	173.3	172.146	[M+H]+	C10H20O2	B	54076	66048	71248	70431	68152	55303	49899	64534	59176	55921	54864	52047	75451	79867	73736	87566	59371	77488	62379	50937	52076	73088	63567	81712	59300	78858	82006	87370	66760	60361	56002	52853	60669	66487	54046	53889	63853	78509	104440	74700	84253
MEDP0760	9-Fluorenone	Aldehyde,Ketones,Esters	Ketones	181.058	180.058	[M+H]+	C13H8O	B	29746	40362	23409	39107	32830	22237	19197	20035	11278	35568	18545	10985	38948	45962	34661	26089	24490	39655	38727	37219	23120	14777	25763	52517	46764	62429	36970	51413	50612	43415	16864	19295	24483	12802	23632	26763	37909	47769	50550	42145	39439
MEDP0789	2-Pentyl-3-phenyl-2-propenal	Aldehyde,Ketones,Esters	Aldehydes	203.4	202.136	[M+H]+	C14H18O	A	133260	155720	154240	130430	136340	138100	93272	83535	95875	108790	109160	99651	172650	178750	172060	168780	160450	182650	148960	132660	126360	149330	142700	163520	209770	283400	220010	210780	186960	216860	82221	82542	87739	83881	85788	110440	198520	186390	213820	184650	176560
MEDP1001	Delta-Hexalactone	Aldehyde,Ketones,Esters	Esters	115.075	114.068	[M+H]+	C6H10O2	A	36046	77388	54865	62793	68003	59909	165550	109220	156660	159980	151040	183620	145030	99433	60033	89488	88799	291910	75396	72765	77678	56761	71937	113620	168130	389800	326060	152480	192000	259020	265070	261020	231270	260780	304040	248500	84977	128350	66338	119970	140950
MEDP1062	Thioacetic acid-S-methyl ester	Aldehyde,Ketones,Esters	Esters	91.1	90.0139	[M+H]+	C3H6OS	A	1220800	1878100	1298800	1879900	1807600	1981500	812790	576180	941240	471980	934030	854810	594830	1309200	947400	934120	958060	965480	3271100	3068800	3405700	3198100	2439700	1424200	1821900	2188100	1034000	1434400	1735900	2039300	264530	253040	255990	243840	468860	176000	3342100	3012200	2300400	3202200	3591100
MEDP1118	Aldosterone	Aldehyde,Ketones,Esters	Ketones	361.191	360.194	[M+H]+	C21H28O5	A	9	9	9	9	9	9	9	9	9	9	9	9	9	9	9	9	9	9	9	9	9	9	9	9	560830	702040	616470	508130	821710	529780	9	9	9	9	9	9	9	9	9	9	9
MEDP1170	9-octadecenal	Aldehyde,Ketones,Esters	Aldehydes	313.3	266.261	[M+H]+	C18H34O	A	3799900	4455600	4348200	3191600	3856100	4676600	5544300	7785400	6758100	7564800	6372100	6207100	2327200	2776800	2616800	2341000	2648200	3113200	2857700	2871100	3239300	3409300	3759100	2958600	5256400	4649700	5729500	4274100	3786600	4324200	2635000	2532600	3006400	3491000	2473200	2293300	4641900	4667000	4631200	3036000	2858200
MEDP1186	Methyl 2-pyrrolidone-5-carboxylate	Aldehyde,Ketones,Esters	Esters	144.064	143.058	[M+H]+	C6H9NO3	B	229960	234920	179140	156830	199650	161020	300770	255760	220420	195880	295090	221650	9	9	9	9	9	9	9	9	106580	48580	103140	124360	9	9	9	9	9	9	197480	231900	178360	205430	213540	194800	9	9	9	9	9
MEDP1203	(1R, 6S) -6-amino-5-oxocyclohexyl-2-ene-1-carboxylic acid ester	Aldehyde,Ketones,Esters	Esters	156.1	155.058	[M+H]+	C7H9NO3	A	117450000	101480000	143850000	100600000	104990000	130240000	110090000	125000000	131300000	122480000	117970000	117480000	120550000	126230000	114850000	135140000	128200000	112970000	290380000	302200000	318160000	306700000	286950000	122960000	331120000	320050000	355580000	335200000	339750000	378200000	19656000	15817000	18261000	15834000	14530000	19398000	197810000	156890000	181570000	172890000	143830000
MEDP1271	2-Ethylhexyl phthalate	Aldehyde,Ketones,Esters	Esters	279.2	278.152	[M+H]+	C16H22O4	B	18366000	18616000	20912000	17055000	17553000	20111000	14019000	12582000	14275000	17891000	14302000	14382000	20875000	21329000	20603000	20840000	19490000	21684000	20639000	17397000	19115000	18560000	20659000	22977000	29725000	29905000	26606000	28236000	22237000	26788000	9316100	7665200	7967500	8170800	7992300	9507200	23022000	21270000	22585000	17633000	18105000
MEDP1274	(4Z, 7Z, 10Z, 13Z, 16Z, 19Z) -Eicosahexaenoate	Aldehyde,Ketones,Esters	Esters	357.3	356.272	[M+H]+	C24H36O2	A	8044.7	6713.1	5081.5	10224	11397	7918.2	12526	9	9	9	4305.4	6735.2	9	9	9	9	9	9	5952.9	9814.5	6258.9	17764	10565	6250	9	9	9	9	9	9	34606	45873	67299	63395	53397	36762	42595	70110	65284	53111	63560
MEDP1314	Monoisobutyl phthalate	Aldehyde,Ketones,Esters	Esters	223.095	222.089	[M+H]+	C12H14O4	B	142470	132290	135580	132400	127360	136180	147150	142700	244870	156190	178230	189320	165240	163130	180780	153710	179760	155130	175320	165380	151000	161590	127260	166660	159470	170510	156280	157660	168240	162060	152020	168750	153090	138450	139210	153310	169670	148860	189970	176940	178640
MEDN0005	L-Threonine	Amino acid and Its metabolomics	Amino acids	118.05	119.058	[M-H]-	C4H9NO3	A	1682500	1505600	1236600	1506100	1778100	1881900	666220	584860	1043300	596570	635470	737150	790840	1047000	512700	927070	703550	589480	4169100	6294700	5096600	4919200	4770400	1202600	1550200	1734400	1947600	1865800	1980400	2161900	1215300	1181900	1030500	1329600	1075300	1196400	696440	992240	1102900	1391800	850530
MEDN0007	L-Arginine	Amino acid and Its metabolomics	Amino acids	173.104	174.112	[M-H]-	C6H14N4O2	B	29876000	31515000	35861000	31091000	28239000	36798000	149840000	131240000	158190000	140580000	145090000	135200000	21687000	14716000	7981400	14280000	15431000	14350000	55852000	50940000	55478000	41966000	55843000	16019000	73072000	105160000	81482000	68999000	80707000	73828000	35135000	35777000	32921000	37585000	32991000	37252000	21154000	16127000	15362000	15031000	11786000
MEDN0009	L-Aspartic Acid	Amino acid and Its metabolomics	Amino acids	132.03	133.038	[M-H]-	C4H7NO4	A	11863000	7409100	7240200	8546700	8855900	11740000	9534500	15279000	15626000	12295000	8573900	13887000	8797200	12844000	9489600	11440000	10670000	9122100	19306000	12805000	15313000	15858000	12259000	12705000	10406000	8789800	6028200	5593700	20574000	6254700	27789000	27221000	26244000	28553000	22553000	29183000	9088000	8646600	5620600	7924800	8931000
MEDN0010	L-Citrulline	Amino acid and Its metabolomics	Amino acids	174.088	175.096	[M-H]-	C6H13N3O3	A	546650	645240	664490	626450	526170	660160	3454000	2785400	3764900	3253900	3654900	3249400	988520	606520	371840	679770	783250	1137000	1274500	1168300	1281200	1261400	1321500	557330	1639600	2172000	2190700	1849500	1871600	1626900	714220	705300	664570	724760	719430	804760	2590000	1824500	2359000	2313100	3501700
MEDN0011	L-Glutamic Acid	Amino acid and Its metabolomics	Amino acids	146.045	147.053	[M-H]-	C5H9NO4	A	49126000	52977000	40235000	44515000	48300000	53527000	25340000	25694000	31464000	32113000	27805000	34059000	44215000	39161000	37222000	39708000	36604000	30132000	70186000	49504000	59883000	60720000	46450000	38770000	70641000	73816000	78180000	79576000	88257000	79988000	46999000	50735000	48425000	50597000	42877000	48025000	49245000	45459000	35698000	46927000	48572000
MEDN0012	L-Histidine	Amino acid and Its metabolomics	Amino acids	154.062	155.07	[M-H]-	C6H9N3O2	A	5309100	4608700	6319600	4787400	4805500	6199300	6914700	6750300	7414800	6623800	6685100	6829900	5011400	5828300	4620900	6155000	6285200	4874800	17223000	20913000	20125000	18014000	16907000	6311200	18728000	20160000	20719000	20426000	20644000	18686000	1649000	1432600	1749500	1329000	1447800	1609400	9148600	6943300	8008800	7598500	6002800
MEDN0015	L-Phenylalanine	Amino acid and Its metabolomics	Amino acids	164.071	165.079	[M-H]-	C9H11NO2	A	64150000	77387000	54373000	71519000	79993000	68922000	44061000	40670000	65685000	34297000	42558000	45876000	60994000	80844000	74502000	75645000	63931000	78020000	70843000	71582000	77403000	70428000	64172000	87387000	41795000	39678000	32813000	33393000	36285000	41021000	24605000	24407000	28404000	24332000	30248000	28616000	53194000	67420000	55342000	63696000	60286000
MEDN0017	L-Pyroglutamic Acid	Amino acid and Its metabolomics	Amino acid derivatives	128.035	129.043	[M-H]-	C5H7NO3	A	97686	150850	89281	102390	107600	116060	260980	178950	326810	239520	250710	282520	138970	198940	125830	158230	165720	189260	145330	142320	146470	123550	129610	194130	52130	48824	62079	48107	64409	38885	154340	165320	202680	113880	204700	217990	92671	106810	121200	79843	56104
MEDN0018	L-Serine	Amino acid and Its metabolomics	Amino acids	104.035	105.043	[M-H]-	C3H7NO3	A	640160	684520	589680	522700	627740	759810	1651400	1484000	1956700	1279100	1280800	1563900	1845200	1718500	1643500	2129700	1676300	1552800	2202400	2112700	2421900	1840800	2283600	1652500	1648900	2049600	2011300	1914300	2661500	2245200	1894800	1748300	1609000	1750000	1962800	1748200	1010400	1102400	710140	829350	740190
MEDN0022	(5-L-Glutamyl)-L-Amino Acid	Amino acid and Its metabolomics	Small Peptide	217.082	218.09	[M-H]-	C8H14N2O5	A	691580	949860	898390	911820	902800	892750	619280	663250	497990	410790	499670	480310	383550	312470	167720	239480	211990	272830	222860	304670	267570	268830	358510	335510	182200	183290	199370	112160	163660	162430	542350	575450	529920	527510	636660	594240	588760	459130	567460	412270	466560
MEDN0024	3-Chloro-L-Tyrosine	Amino acid and Its metabolomics	Amino acid derivatives	214.027	215.035	[M-H]-	C9H10ClNO3	A	461290	1739100	199840	569580	496260	50365	8973.7	8411.5	17867	4367	11166	11650	58692	819800	82137	146670	36648	31977	9	9	5149.7	8121.8	9	995260	9	9	9	9	9	9	151740	128380	113720	105160	138380	103490	12821000	7186900	3728900	3943200	4771900
MEDN0025	3-Hydroxy-3-Methylpentane-1,5-Dioic Acid	Amino acid and Its metabolomics	Amino acid derivatives	161.045	162.053	[M-H]-	C6H10O5	A	336140	174020	177170	305760	324240	438430	530370	312930	372390	255630	456990	558340	126260	302490	223890	208050	164800	287190	365850	399490	271530	352010	336610	347080	326100	417880	414490	361340	446730	224890	3744300	3297600	4030900	3070900	4072500	3343500	479900	332870	523050	711550	323900
MEDN0026	3-Iodo-L-Tyrosine	Amino acid and Its metabolomics	Amino acid derivatives	305.963	306.971	[M-H]-	C9H10INO3	A	9	9	9	9	9	9	9	9	9	9	9	9	9	9	9	9	9	9	9	9	9	9	9	9	896940	1570500	1451500	1861500	2171400	1637700	9	9	9	9	9	9	9	9	9	9	9
MEDN0028	4-Hydroxy-L-Glutamic Acid	Amino acid and Its metabolomics	Amino acid derivatives	162.04	163.032	[M-H]-	C5H9NO5	A	39662	27272	29052	40997	47762	47185	195990	208740	271830	226490	217520	245850	43489	31160	30212	44369	41525	30465	114840	115620	136320	101350	96469	34660	57573	61237	59115	49675	63077	44753	58034	75599	68288	91472	69335	82859	62631	38005	33479	47148	35006
MEDN0041	Hexanoyl Glycine	Amino acid and Its metabolomics	Amino acid derivatives	172.097	173.105	[M-H]-	C8H15NO3	A	13020	13333	7572.4	8894.5	8216.2	9588.2	43255	36066	101640	18114	46360	26772	26055	22631	6870.9	9	25001	33940	17134	11146	18822	16118	12679	27131	110570	102250	138150	117180	295770	106570	15396	11332	15599	12169	17125	13432	21911	5988	13031	7510	10605
MEDN0042	L-Asparagine Anhydrous	Amino acid and Its metabolomics	Amino acids	131.046	132.054	[M-H]-	C4H8N2O3	A	1414900	1504200	1198300	1567400	1794300	1541900	1186600	930810	1479900	921840	1074000	1006800	969390	1500900	589040	1268400	853840	881670	6470300	7504200	6353400	5707000	6100400	1473600	1345800	1601600	1857900	1513900	1756300	1727400	2974500	3159000	2606100	3303800	3002900	2650100	570870	707540	575590	558030	530980
MEDN0044	L-Cystathionine	Amino acid and Its metabolomics	Amino acid derivatives	221.06	222.067	[M-H]-	C7H14N2O4S	A	59435	63146	50839	61821	89371	89618	1482400	2089100	1816400	2856000	1905800	1667800	153620	182510	147750	178240	143430	165710	118290	129170	146410	115410	141660	197890	27177000	30934000	35090000	37129000	32415000	26237000	1297600	1173400	1092500	1466500	891870	1292700	408110	333590	348170	290500	192570
MEDN0046	L-Glutamine	Amino acid and Its metabolomics	Amino acids	145.061	146.069	[M-H]-	C5H10N2O3	A	4949900	5139500	3818300	4842800	4690200	4783500	7971200	7388000	6744200	6448400	7723300	7261100	8782600	10480000	7090600	10553000	9146000	10230000	14759000	17527000	13430000	12702000	14237000	10773000	11950000	12384000	14908000	12194000	13385000	13185000	17328000	17937000	14876000	17726000	16447000	16767000	7506300	9085600	7405200	7075500	7452400
MEDN0051	Methionine Sulfoxide	Amino acid and Its metabolomics	Amino acid derivatives	164.038	165.046	[M-H]-	C5H11NO3S	A	9	9	9	9	9	9	25482	32349	76491	46974	45608	126080	25078	21015	13020	19746	19138	13358	884600	845620	954270	1109600	809830	32985	2857600	2973900	3039000	2968300	2896600	3634500	1911100	1858600	1828700	2067100	2029500	1764600	1032900	1524900	1949600	1768600	1719100
MEDN0056	N-Acetyl-L-Leucine	Amino acid and Its metabolomics	Amino acid derivatives	172.097	173.105	[M-H]-	C8H15NO3	A	713440	919980	699970	814810	876310	852410	2777900	3067800	5444200	2394400	3212200	2776600	291110	477360	217130	293470	281930	669200	237570	335430	269190	333790	324060	560600	872740	1393900	495920	516490	815480	588100	1017000	280740	1083200	356430	824690	391670	612910	572090	628370	796510	495670
MEDN0060	N-Isovaleroylglycine	Amino acid and Its metabolomics	Amino acid derivatives	158.082	159.09	[M-H]-	C7H13NO3	A	9	9	9	9	9	9	6102.3	12020	5673.9	9	9	9	9	9	9	9	9	9	10567	8525.1	13727	7108.1	9994.5	6813.5	9	9	9	9	9	9	9	9	9	9	9	9	9	5395.6	7775	7360.6	2850.7
MEDN0061	N-Phenylacetylglycine	Amino acid and Its metabolomics	Amino acid derivatives	192.066	193.074	[M-H]-	C10H11NO3	A	11685	19968	9	22581	9	16905	21570	12871	117790	11825	18576	21872	9	9	9	9	9	9	63574	59820	55647	66198	63191	14688	9	9	9	9	9	9	58954	38887	50308	52014	48062	48405	9	9	9	9	9
MEDN0062	N-Propionylglycine	Amino acid and Its metabolomics	Amino acids	130.05	131.058	[M-H]-	C5H9NO3	A	2871800	3245500	2754300	2985500	3398800	3237800	1186400	1265000	2107700	829630	1229100	1467300	1593500	3380100	1973900	2509800	1940400	1986100	3471200	3788400	4037600	3357800	3848000	3800400	1855900	2207200	1532600	1437000	1854900	2117800	530940	407280	487390	393460	554540	437980	1894900	2414800	2200100	2439100	1777400
MEDN0065	O-Phospho-L-Serine	Amino acid and Its metabolomics	Amino acid derivatives	184.001	185.009	[M-H]-	C3H8NO6P	A	397720	652180	289070	410340	549880	447310	389790	786980	442910	540250	623790	641790	262040	319110	277540	310900	351070	296800	972290	844340	951750	761810	855340	253720	552100	607360	590960	542010	557940	621230	353460	316210	329070	245680	295280	346120	1388000	1299900	1342300	1293700	1418900
MEDN0066	Phenylacetyl-L-Glutamine	Amino acid and Its metabolomics	Amino acid derivatives	263.103	264.111	[M-H]-	C13H16N2O4	A	9	9	9	9	9	9	1731500	691820	2324700	778280	776110	793730	36965	30313	56476	21053	67906	150440	18670	17084	19325	14633	13897	41498	132600	109220	137900	62366	84464	52225	9	9	9	9	9	9	15091	16458	22820	21639	22519
MEDN0070	Sarcosine	Amino acid and Its metabolomics	Amino acids	88.0399	89.048	[M-H]-	C3H7NO2	A	9	9	9	9	9	9	36069	40541	36955	42566	28731	30945	11870	13305	6350	17056	6458.2	9817.4	29714	26187	32581	36773	24729	13763	31294	32364	30711	31410	44273	46850	64655	71566	63854	44444	60739	70423	18410	17331	16795	6465.3	13063
MEDN0071	S-Sulfo-L-Cysteine	Amino acid and Its metabolomics	Amino acid derivatives	199.969	200.977	[M-H]-	C3H7NO5S2	A	5287.8	2739.3	2066.6	9	9	13074	843620	517860	598160	126090	585600	518040	20104	21565	49177	51280	36029	29210	26363	16705	33523	15282	19678	17667	95678	74111	252960	98275	127210	94400	15449	14591	35875	31680	22678	27743	15914	8891.6	10573	9867	15276
MEDN0289	3-Aminoisobutanoic Acid	Amino acid and Its metabolomics	Amino acids	102.056	103.063	[M-H]-	C4H9NO2	A	9	9	9	9	9	9	6123	756.74	3429	2742	2742	5555.9	11941	17211	6858	6927.7	4799	6172.5	4186.4	7735.5	8443.5	4114	3429	13714	684.82	2056.5	4114	1441.7	4114	1372	6171	9586.2	7686.8	11044	13296	9745.4	5555.7	6242.6	3429.9	4113	2742
MEDN0318	Homogentisic Acid	Amino acid and Its metabolomics	Amino acid derivatives	167.034	168.042	[M-H]-	C8H8O4	A	4069500	3881700	2275700	2214200	4122000	3040200	36060000	20805000	34459000	34034000	38448000	37950000	228590	298300	420290	280030	304230	455700	338070	476750	503920	494080	511130	317220	1067800	1773000	1168200	1202000	885700	970530	1087500	1099000	970860	1014600	1157100	1057200	1613600	1054700	1334500	1631000	1605400
MEDN0323	Kynurenic Acid	Amino acid and Its metabolomics	Amino acid derivatives	188.035	189.043	[M-H]-	C10H7NO3	A	54034000	28147000	61407000	60739000	93226000	84049000	1001100	579560	752570	667900	851360	981920	7846400	6152000	12203000	12547000	15919000	16623000	1216800	728600	753070	1405700	1242100	6851000	126190	88808	82243	92467	330140	53989	995670	919070	1042500	673520	939310	651060	27322000	25488000	36240000	35480000	26215000
MEDN0345	1,3,7-Trimethyluric Acid	Amino acid and Its metabolomics	Amino acid derivatives	209.067	210.075	[M-H]-	C8H10N4O3	A	9	9	9	9	9	9	9	9	13454	9	9	12251	9	9	9	9	9	9	79263	92376	75863	88600	72105	9	9	9	9	9	23009	21977	9	9	9	9	9	9	82385	85638	75174	81203	95061
MEDN0439	N-Acetylthreonine	Amino acid and Its metabolomics	Amino acid derivatives	160.061	161.069	[M-H]-	C6H11NO4	A	26628	39054	31131	30969	42845	28881	24280	17133	41552	25566	19412	34051	75590	119270	80550	111240	120180	141070	17168	21452	18664	14364	17497	125110	59471	76821	61362	40830	103590	46632	19550	14891	24087	17744	20563	14225	10101	24383	16532	24111	21381
MEDN0472	1-Methyluric Acid	Amino acid and Its metabolomics	Amino acid derivatives	181.036	182.044	[M-H]-	C6H6N4O3	A	25380	99095	53965	28855	22852	37581	9	9	9	9	9	9	134780	91304	80445	84620	159540	140310	266130	264690	228240	274260	240120	141550	1549700	1570900	1841900	1359600	1516400	971340	9	9	9	9	9	9	750430	663150	428260	262110	243910
MEDN0487	Allysine	Amino acid and Its metabolomics	Amino acids	144.066	145.074	[M-H]-	C6H11NO3	B	159410	247400	212630	223560	182020	242790	103030	126930	111390	104190	161510	86226	91498	46755	48455	59905	31831	42126	264270	304540	297340	260340	247640	59670	9	38712	14999	12683	9	23286	86952	62669	87781	54253	81180	74075	9	9	9	9	9
MEDN0496	N-Acetylmethionine	Amino acid and Its metabolomics	Amino acid derivatives	190.054	191.062	[M-H]-	C7H13NO3S	A	26607	58634	46572	41063	47988	36512	462030	393250	466390	335570	399450	434500	28978	41958	20368	31201	34069	36926	7469.7	9781	7060.5	8311.8	9932.9	37412	28004	41107	34165	42273	28220	24899	20640	32270	26577	24046	33180	24940	18262	19920	23690	14575	13295
MEDN0561	N-Acetylaspartylglutamic acid	Amino acid and Its metabolomics	Amino acid derivatives	303.083	304.091	[M-H]-	C11H16N2O8	B	135340	219570	125060	132600	135480	164260	109070	59143	73387	41882	69582	89393	313230	282030	239230	337690	515670	618290	239070	215970	223820	204770	240170	359400	77235	91509	62410	79926	88969	48431	48297	34359	38325	36985	45991	44994	43899	44077	55013	40209	38491
MEDN0579	N-lactoyl-phenylalanine	Amino acid and Its metabolomics	Amino acid derivatives	236.092	237.1	[M-H]-	C12H15NO4	A	9609.9	21021	6015	11714	20982	10825	620590	202850	738430	310540	293550	216980	47071	121310	26815	42728	58184	52019	11709	9455.9	6505.7	15147	13417	154190	26438	13784	26994	14478	13386	17560	948210	55814	835550	389710	165690	98256	14985	18975	96889	14531	26853
MEDN0587	N-Acetylvaline	Amino acid and Its metabolomics	Amino acid derivatives	158.082	159.089	[M-H]-	C7H13NO3	B	17915	35706	17441	21704	22004	33888	72462	63091	111510	55705	91696	84325	24697	35763	22674	23638	26239	66188	9	15267	8311	12011	12283	33216	29478	49412	32932	32153	45765	32420	25772	11684	28664	17070	32823	15974	38498	28576	25581	53523	33202
MEDN0606	5-Methoxytryptophan	Amino acid and Its metabolomics	Amino acid derivatives	190.087	191.095	[M-H]-	C11H13NO2	A	1575800	1742800	1099800	846080	1402500	1091400	197740	132580	165250	98275	114570	118510	56807	58131	114350	119120	132540	203060	37788	19181	22335	19559	12328	80451	39520	40586	62544	72919	579530	9	2283100	2730100	2616100	2977900	2959600	3161700	282780	357030	426250	541750	456940
MEDN0616	O-Acetyl-L-serine	Amino acid and Its metabolomics	Amino acid derivatives	146.045	147.053	[M-H]-	C5H9NO4	B	74634	97785	91690	107690	77695	97421	116970	94722	64688	98330	93688	101460	224220	201360	233370	217240	285550	199470	788760	1128000	906130	929450	1238800	243080	131180	103630	129230	139120	87149	130830	52116	75514	69016	75542	91503	73473	88256	88588	78037	64814	57305
MEDN0662	Gamma-Glu-Leu	Amino acid and Its metabolomics	Small Peptide	259.129	260.137	[M-H]-	C11H20N2O5	A	636780	1298000	698300	864060	868130	833640	540860	431550	730240	205350	451680	236320	106380	144460	58789	65947	90428	85441	300210	303760	258840	232370	284760	126610	38438	39666	41267	32589	82820	35954	9545000	12125000	11398000	9465200	11473000	9846700	2627500	3595400	2854500	2756200	1796700
MEDN0720	N-(2-Methylbenzoyl)glycine	Amino acid and Its metabolomics	Amino acid derivatives	192.066	193.074	[M-H]-	C10H11NO3	B	11685	19968	9	22581	9	16905	21570	12871	117790	11825	18576	21872	9	9	9	9	9	9	63574	59820	55647	66198	63191	14688	9	9	9	9	9	9	58954	38887	50308	52014	48062	48405	9	9	9	9	9
MEDN0818	N-acetyl-beta-alanine	Amino acid and Its metabolomics	Amino acid derivatives	130.05	131.058	[M-H]-	C5H9NO3	A	2606400	3182100	3382200	3483900	3598800	3962300	1119600	1069400	1235100	920970	1055300	1374100	369260	430920	276050	337010	339700	424160	412170	524590	500060	380930	395200	417260	1519500	2164300	1681800	1519700	2044800	1848900	324100	349710	291430	334760	391320	350710	148090	256440	233270	117340	122130
MEDN0822	Cysteine glutathione disulfide	Amino acid and Its metabolomics	Small Peptide	425.08	426.088	[M-H]-	C13H22N4O8S2	A	779380	574360	546530	534200	1529300	1668600	2426200	2986700	2463300	1461400	1741600	2472600	2241600	2370200	2415100	2995100	2879100	1817000	3730700	1561900	2111100	1524200	1335600	2390100	4581500	1461500	6553700	3036700	2294000	3398700	3245300	4443000	3659200	3675100	3362200	2903900	1132300	1031100	916220	677710	935600
MEDN0834	O-Succinyl-L-Homoserine	Amino acid and Its metabolomics	Amino acid derivatives	218.066	219.074	[M-H]-	C8H13NO6	A	12595	11655	13712	11887	10897	10302	10318	21206	18102	25853	12163	28920	9	9	9	9	9	9	19011	16882	21322	28780	30795	20817	46181	45599	52182	38290	60511	62985	60270	62984	41594	59683	43553	48061	23340	29064	22064	28467	14584
MEDN0839	N-Alpha-Acetyl-L-Asparagine	Amino acid and Its metabolomics	Amino acid derivatives	173.056	174.064	[M-H]-	C6H10N2O4	A	38886	64660	45009	44680	77240	57267	65701	60923	24784	34747	43465	51620	60732	126430	62406	114960	102180	172480	86460	62373	81683	138000	87884	102810	51767	30468	101480	34600	51232	35212	66371	38201	92653	48407	31435	63529	28789	27996	53940	44566	63803
MEDN0843	N-Amidino-L-Aspartate	Amino acid and Its metabolomics	Amino acid derivatives	174.052	175.059	[M-H]-	C5H9N3O4	A	1195000	1330500	1704600	1373400	1135500	1787700	7279200	6602000	8620500	7252400	7785700	6866700	1328000	846420	425610	790710	885690	736380	2388700	2390900	2433300	1971100	2555700	784450	3238400	5285600	3966900	3413700	4194900	3478400	1728000	1839800	1674800	1844800	1683800	1923200	1212800	838980	664970	539170	620510
MEDN1016	P-Aminohippuric Acid	Amino acid and Its metabolomics	Amino acid derivatives	193.061	194.069	[M-H]-	C9H10N2O3	A	9	9	9	9	9	9	9	9	9	9	9	9	9	9	9	9	9	9	9	9	9	9	9	9	9	9	9	9	9	9	36859	37478	53770	50072	57047	51951	800670	703850	655030	729970	522460
MEDN1029	Glycyl-L-phenylalanine	Amino acid and Its metabolomics	Amino acid derivatives	221.093	222.1	[M-H]-	C11H14N2O3	A	19869	53211	64554	46741	130860	27569	512660	373050	723760	238860	452470	435700	21433	42938	32149	23260	11004	69903	14133	8816.4	6901.6	10159	18252	33541	9	9	9	9	9	9	20004	28187	24989	18816	29244	10476	11408	26043	37059	19969	11446
MEDN1060	L-Isoisoleucine	Amino acid and Its metabolomics	Amino acids	130.087	131.095	[M-H]-	C6H13NO2	B	120180000	128830000	115490000	129070000	140350000	135970000	51774000	53728000	90478000	36771000	52879000	61468000	75389000	144830000	85763000	112000000	87353000	88318000	143760000	145710000	155380000	138340000	147530000	151960000	73847000	88243000	64695000	59588000	78353000	82154000	34921000	29636000	32456000	28957000	31821000	27422000	75992000	95470000	89929000	93080000	72425000
MEDN1085	Glutathione	Amino acid and Its metabolomics	Small Peptide	611.144	612.151	[M-H]-	C20H32N6O12S2	A	17974000	14080000	16764000	12110000	16124000	29043000	9100400	8612000	8301400	9968200	8507000	8780600	33821000	35648000	28958000	42475000	38101000	24010000	30468000	32026000	28008000	24702000	26394000	36655000	14013000	5914800	9208700	10708000	10765000	9149100	37141000	33262000	35303000	31091000	33997000	32093000	18793000	22547000	16918000	15553000	13537000
MEDN1171	Glutamine	Amino acid and Its metabolomics	Amino acids	478.3	479.267	[M-H]-	C29H37NO5	A	1774400	1039700	1569000	1150300	1706100	2891600	10100000	9096600	8724000	6858800	5149200	9100100	541720	2247900	2858100	2976900	2573800	3024100	1073500	979290	1439400	856820	1869800	2479700	5842200	7004800	8007400	6332300	8605600	7638500	25340000	26903000	26714000	31663000	25371000	23162000	208600	189710	190660	195310	231230
MEDN1200	L-tyrosine methyl ester 4-sulfate	Amino acid and Its metabolomics	Amino acid derivatives	274.039	275.046	[M-H]-	C10H13NO6S	B	398120000	285100000	430670000	360610000	376430000	271610000	11193000	9851300	8831300	10031000	10211000	9153300	428770000	607430000	533420000	610710000	592240000	558310000	144830000	272960000	141560000	189970000	147940000	627170000	46904000	42157000	56130000	28348000	60267000	36201000	333480	261400	201540	287060	359130	176810	405410	198090	228480	1372200	3756100
MEDN1246	3-(pyrazol-1-yl) -L-alanine	Amino acid and Its metabolomics	Amino acid derivatives	154.062	155.069	[M-H]-	C6H9N3O2	A	8662100	7928600	12301000	8136200	7981800	10766000	9275800	8292600	9985900	8265300	9195600	8471000	10113000	11128000	8284900	11060000	10780000	9177700	19988000	24983000	25245000	23558000	23030000	11260000	26957000	27027000	27980000	26497000	28075000	28848000	1522500	1322400	1537900	1289000	1414400	1672700	18524000	13541000	15092000	14594000	10765000
MEDN1306	N-Carbamoyl-L-aspartate	Amino acid and Its metabolomics	Amino acid derivatives	175.04	176.13	[M-H]-	C5H8N2O5	A	709360	713350	854610	770770	761510	847440	59716	69048	104560	67881	91583	94576	65021	98656	122670	42968	63619	67820	79730	83558	85317	81460	67384	105810	200040	326690	277980	210940	384360	250220	8622.8	10097	13508	3974.3	16828	7913.7	13649	15876	10445	11943	8868.8
MEDP0002	D-Homocysteine	Amino acid and Its metabolomics	Amino acids	136	135.035	[M+H]+	C4H9NO2S	A	1079100	1677500	768030	1381600	1264000	1532400	604250	706670	795820	526900	578610	655740	512290	1168400	563620	748890	570590	715220	2538600	2657600	2907800	2408400	2147900	1098500	1629700	1732500	862400	1320800	1386700	1213300	381750	198040	268390	223940	396650	375360	2773700	2550800	1999000	3025000	2785500
MEDP0006	Glycine	Amino acid and Its metabolomics	Amino acids	76	75.032	[M+H]+	C2H5NO2	A	344010	280490	407760	238050	233590	371610	738260	925340	1092400	981150	831240	873230	362820	604640	459430	517570	610250	480910	3127500	2204800	2524500	2715300	2331800	508540	1086200	917180	1043000	1220300	1096000	1785100	352890	305600	311840	249900	251510	293400	82012	101110	85745	67392	121070
MEDP0007	L-Cystine	Amino acid and Its metabolomics	Amino acids	241	240.024	[M+H]+	C6H12N2O4S2	B	8815.3	11983	37826	32972	54509	27480	141550	123880	761570	192270	170490	130520	65694	17337	33004	18136	24128	8269.4	88303	85506	104110	111400	113650	30767	35791	22891	140190	28948	21161	76280	125640	107630	92143	75218	108720	74072	99241	94776	105630	78553	74787
MEDP0009	L-Tyrosine	Amino acid and Its metabolomics	Amino acids	182.1	181.074	[M+H]+	C9H11NO3	A	177720000	185200000	152340000	181370000	177640000	185690000	101400000	125580000	115880000	88569000	95489000	100140000	148120000	178160000	134380000	155330000	154740000	153390000	185240000	193710000	163280000	205270000	202740000	159310000	162640000	148940000	124100000	132570000	145240000	138170000	70065000	44449000	51822000	35203000	58142000	54247000	196160000	208540000	191000000	206560000	216690000
MEDP0011	L-Lysine	Amino acid and Its metabolomics	Amino acids	147	146.106	[M+H]+	C6H14N2O2	A	97956000	104950000	76657000	75166000	89698000	112920000	72231000	75867000	109320000	54766000	73945000	82384000	75827000	63303000	38281000	61842000	73874000	76095000	102700000	115490000	120110000	109330000	105600000	62312000	63898000	139290000	33898000	45029000	124610000	45810000	158350000	163790000	157840000	179480000	168290000	161160000	106520000	112090000	81668000	96452000	78645000
MEDP0012	L-Ornithine	Amino acid and Its metabolomics	Amino acids	133	168.067	[M-Cl]+	C5H13ClN2O2	A	190890	118460	131410	146200	162840	139070	1341500	1201500	2467300	1236100	885890	746350	605090	597130	310670	244270	569970	1085700	473720	637350	795190	507890	466130	617850	502720	1323500	539820	478900	1171100	585510	526080	483790	505900	591470	622690	351030	274740	343250	346210	312940	479560
MEDP0013	L-Alanine	Amino acid and Its metabolomics	Amino acids	90.048	89.048	[M+H]+	C3H7NO2	B	6786200	6927600	3230300	3476200	3620700	5398000	24977000	16915000	23864000	20056000	17507000	16870000	7793500	9269700	8329600	7127600	6510800	6594300	13178000	14876000	14634000	15463000	17186000	7301100	19073000	17858000	19143000	16498000	18931000	28256000	13607000	15072000	14129000	15879000	17682000	15935000	11758000	9985400	10585000	13017000	7732600
MEDP0020	L-Methionine	Amino acid and Its metabolomics	Amino acids	150	149.051	[M+H]+	C5H11NO2S	A	44666000	46795000	32708000	29315000	32648000	32578000	27240000	26148000	31197000	29959000	24074000	20252000	28024000	27150000	24069000	32229000	27123000	21863000	12734000	16436000	12914000	19609000	23950000	20958000	15707000	17405000	20300000	16239000	18513000	13698000	13783000	15132000	16755000	9413400	10897000	8273700	7275400	16467000	18900000	8328200	7290800
MEDP0022	L-Proline	Amino acid and Its metabolomics	Amino acids	116.1	115.063	[M+H]+	C5H9NO2	A	389330000	367920000	391860000	384100000	376620000	396110000	333220000	359930000	341490000	362650000	331870000	344130000	359150000	350520000	340160000	358670000	357850000	312410000	268490000	290530000	236960000	271710000	304560000	349470000	349680000	347950000	346570000	359020000	365480000	340110000	456530000	455120000	456110000	453160000	446200000	437630000	397720000	393590000	397350000	410540000	389670000
MEDP0025	L-Tryptophan	Amino acid and Its metabolomics	Amino acids	205.1	204.09	[M+H]+	C11H12N2O2	A	234870000	254540000	216590000	241480000	224850000	234260000	37089000	33029000	71595000	27258000	39464000	39833000	70960000	90573000	66745000	84305000	73385000	75811000	228260000	226580000	236410000	222310000	206090000	99028000	54707000	99768000	43752000	54156000	73834000	21420000	156450000	151490000	156510000	149450000	183860000	171820000	300990000	288770000	261790000	279670000	269450000
MEDP0026	L-Valine	Amino acid and Its metabolomics	Amino acids	118.1	117.079	[M+H]+	C5H11NO2	A	116910000	134280000	98619000	120640000	120660000	146930000	129260000	123460000	164390000	110640000	116790000	118400000	115630000	195870000	110490000	176820000	155320000	104060000	173630000	226370000	239770000	196570000	214580000	194720000	217890000	223460000	206080000	195300000	245980000	283630000	47112000	45680000	51749000	45557000	38756000	35024000	222560000	226940000	192280000	227220000	192010000
MEDP0034	3-N-Methyl-L-Histidine	Amino acid and Its metabolomics	Amino acid derivatives	170	187.096	[M-H2O+H]+	C7H13N3O3	A	360530	389680	655590	277190	313030	505120	265730	221810	258830	268170	230160	252890	187550	277990	213780	280400	302810	226380	549320	549610	702610	523560	522740	286820	263260	445280	359540	323030	499920	284020	2856500	3962300	4031400	4322800	4378100	3523800	1008400	1267100	1124600	813670	955860
MEDP0036	5-Oxoproline	Amino acid and Its metabolomics	Amino acid derivatives	130	129.043	[M+H]+	C5H7NO3	A	1307200	1636200	1344400	765050	849300	1252900	9369700	11114000	9807700	10062000	9950800	9492700	5106400	7121200	6257700	6892200	7181800	5979000	13703000	10028000	12233000	11749000	11223000	6177200	12503000	11943000	13323000	12097000	12211000	13984000	4654700	3775800	3865200	4685000	3982500	4359600	2433600	2820700	2464900	1267400	2835800
MEDP0041	D-Alanyl-D-Alanine	Amino acid and Its metabolomics	Small Peptide	161.2	160.085	[M+H]+	C6H12N2O3	B	9	9	9	9	9	9	93297	100560	115660	49306	84002	183010	1984.9	7416.5	5420.2	4745.4	11946	13762	40600	31567	26668	26485	24238	3721.8	17327	13746	23787	32985	11505	23908	178410	165610	160600	179780	160740	140300	4031.9	4053	5753.7	4046	9329.4
MEDP0043	Glutathione Oxidized	Amino acid and Its metabolomics	Small Peptide	613.152	612.152	[M+H]+	C20H32N6O12S2	A	28557000	19701000	23146000	15995000	22183000	40969000	14327000	15936000	13086000	15690000	12472000	14561000	66822000	61090000	54016000	75167000	66333000	50397000	45365000	43732000	47580000	44313000	49762000	66680000	30362000	10460000	14528000	20930000	19678000	15702000	56345000	57372000	50936000	43384000	50554000	45129000	23848000	35984000	24752000	22596000	18286000
MEDP0044	Glutathione Reducedform	Amino acid and Its metabolomics	Small Peptide	308	307.084	[M+H]+	C10H17N3O6S	A	71459000	55156000	51042000	50533000	45042000	49992000	794760	525250	455410	561730	541150	534080	5649100	8053000	8066000	9118200	6363700	4461900	74323000	74480000	70217000	84803000	88433000	3804700	83723000	3112800	43918000	56363000	23944000	46932000	14311000	12816000	21515000	24898000	9132300	8531700	57649000	64356000	67435000	58459000	63723000
MEDP0045	Glycyl-L-Proline	Amino acid and Its metabolomics	Small Peptide	173.2	172.085	[M+H]+	C7H12N2O3	A	2592	7615.9	10268	6077.5	3411.4	2464.5	37207	46658	32681	34531	36635	28000	62315	69423	59740	90469	107480	63790	9339.5	1539.5	4149.8	9396.8	14190	62868	693590	812430	257640	1038900	664720	388270	19857	12892	15364	11188	17958	7662	31070	21904	39002	20697	34377
MEDP0050	L-Carnosine	Amino acid and Its metabolomics	Amino acid derivatives	227.2	226.107	[M+H]+	C9H14N4O3	A	29855	17468	26650	21673	29107	28170	351590	281900	528490	238300	306050	452120	22844	26758	14364	12338	9273.7	34862	23515	36053	17767	30501	40584	21767	97336	17741	76391	159780	46329	159010	187090	178240	140210	98469	113340	95570	53916	54981	49778	23925	28347
MEDP0052	L-Cysteine	Amino acid and Its metabolomics	Amino acids	122.02	121.02	[M+H]+	C3H7NO2S	B	26109	49353	24364	67523	39219	41078	41213	50706	111850	32109	58494	42979	17397	16550	15506	13898	25047	17650	90545	84761	92851	100580	87298	7135.2	103380	56627	187720	186390	63710	127430	54921	30781	23025	60131	53177	36626	33405	24600	20226	7184.7	14586
MEDP0053	L-Dopa	Amino acid and Its metabolomics	Amino acid derivatives	198.069	197.069	[M+H]+	C9H11NO4	A	179400	205060	182390	231780	339780	253580	217050	192750	202170	157150	164270	177090	593120	580260	526690	545260	784440	457360	247390	293840	292590	673900	220220	664590	1298800	1654600	1039600	1002300	856210	1121000	148570	65828	89428	48265	71350	61712	357490	438900	282150	276440	341530
MEDP0055	L-Homocitrulline	Amino acid and Its metabolomics	Amino acids	190.1	189.111	[M+H]+	C7H15N3O3	B	3112500	3328700	4412900	2269200	2235600	4589600	340490	472660	788030	564220	440150	345920	464340	312610	255880	262740	336580	488910	125030	115520	163430	123020	131880	362730	279370	328460	219870	323980	283290	313890	6983000	8367700	8595000	5860000	9230100	6621100	565830	619580	509820	573080	425780
MEDP0056	L-Homocystine	Amino acid and Its metabolomics	Amino acids	269	268.055	[M+H]+	C8H16N2O4S2	A	55829	51245	104940	66072	112040	40357	262600	285770	268120	170710	202340	296320	15595	13800	9	18154	15997	38760	89512	99487	60748	101350	76955	17356	47192	61737	50385	67679	55683	65244	350640	403290	251460	207350	272130	202940	26455	41871	48690	19455	13959
MEDP0058	L-Saccharopine	Amino acid and Its metabolomics	Amino acids	277	276.132	[M+H]+	C11H20N2O6	A	156120	128280	86047	120630	292090	140030	1547800	1905200	1585800	819220	1487900	1369600	423870	972620	634980	744360	780430	581510	775490	1058900	996980	940200	1085900	808950	335130	350480	392720	699290	429350	693050	1557800	1412100	1517900	1174700	1390400	1364700	166040	191310	158820	188580	226630
MEDP0061	N,N-Dimethylglycine	Amino acid and Its metabolomics	Amino acid derivatives	104	103.063	[M+H]+	C4H9NO2	A	3393100	5390100	5021600	4753600	5215600	4840000	13007000	14988000	13381000	11348000	12862000	10411000	16973000	16919000	14180000	14367000	16200000	15976000	5275100	4438000	4397800	4073100	4481200	15051000	8346100	7944000	12552000	11356000	8578800	9191100	10816000	10097000	10878000	10235000	11341000	11927000	3700200	4070800	3563600	2858700	3115400
MEDP0062	N6-Acetyl-L-Lysine	Amino acid and Its metabolomics	Amino acid derivatives	189.116	188.116	[M+H]+	C8H16N2O3	B	872960	1166700	952060	901230	829100	1413500	5571600	3064800	4885500	1862600	5385000	3207900	2151200	2222500	1776000	3214600	2134700	2114200	2489000	2232100	3036000	2184700	2763300	2206900	3988900	5105900	3905800	4432000	4853100	3237000	42057000	50213000	46918000	45456000	53794000	42076000	9338300	8736500	6396700	6193300	4787300
MEDP0063	N-Acetylaspartate	Amino acid and Its metabolomics	Amino acid derivatives	176	175.048	[M+H]+	C6H9NO5	A	10550000	11499000	12504000	12485000	12244000	13161000	1426300	1504300	1686700	1482300	1546800	1657800	314800	305830	368220	374570	331160	343480	934580	861260	874730	930910	966870	351580	3519700	6738100	5484900	4263700	5660900	4861500	148840	103400	120630	105030	100820	123080	9	9	9	9	9
MEDP0065	N-Acetyl-L-Glutamic Acid	Amino acid and Its metabolomics	Amino acid derivatives	190.1	189.064	[M+H]+	C7H11NO5	A	47433000	50815000	58673000	54459000	55324000	55643000	67451000	75511000	71344000	72429000	69351000	70286000	34516000	30393000	38005000	34030000	36265000	28019000	73570000	81750000	63325000	70066000	72398000	27532000	11816000	18260000	15002000	12287000	14709000	14712000	41268000	44754000	41484000	36588000	37608000	42066000	16455000	12723000	14016000	13182000	11831000
MEDP0066	N-Acetyl-L-Tyrosine	Amino acid and Its metabolomics	Amino acid derivatives	224.1	223.085	[M+H]+	C11H13NO4	B	1173900	1823200	923670	1459600	1673800	1731700	482440	394700	918320	424080	462750	455700	108640	161070	152270	111350	209510	701880	230750	248190	212190	243990	180000	189130	278850	341870	177670	208580	379760	194690	254270	134810	198600	114790	205720	177740	425130	280500	268670	460900	326300
MEDP0068	N-Acetylneuraminic Acid	Amino acid and Its metabolomics	Amino acid derivatives	310.1	309.106	[M+H]+	C11H19NO9	A	8157	6114.9	4738.7	10214	7477.8	24513	9	9	9	9	9	9	32748	21834	29281	23192	41659	38896	19035	9200.4	10577	8845	14996	22521	9	9	9	9	9	9	9	9	9	9	9	9	24524	12959	8186	16739	19772
MEDP0071	N-Glycyl-L-Leucine	Amino acid and Its metabolomics	Amino acid derivatives	189.1	188.116	[M+H]+	C8H16N2O3	A	277870	817340	720090	823320	3885400	861190	11263000	7475700	16572000	4808100	8352900	8042000	717250	1499800	956490	876960	545510	1540100	378220	400910	336360	412110	323740	1716600	486630	327070	600540	1006600	348870	820460	303840	333580	284570	203260	333800	328660	342690	522000	865060	429220	275270
MEDP0075	Nα-Acetyl-L-Arginine	Amino acid and Its metabolomics	Amino acid derivatives	217.1	216.122	[M+H]+	C8H16N4O3	A	103710	93211	158040	119710	173990	119150	661870	613710	641490	598480	1061900	1251000	121090	113570	57535	79100	101610	121800	59260	76944	66410	58211	99701	112530	632390	1178400	622050	689490	860690	484950	642850	593610	680600	709620	653260	744540	32940	68169	70288	31892	59280
MEDP0078	Phe-Phe	Amino acid and Its metabolomics	Small Peptide	313.4	312.147	[M+H]+	C18H20N2O3	A	38714	91192	102130	69928	107800	57155	622960	593900	515600	333310	543540	745540	30464	53502	48857	58180	43090	60400	58164	42133	45584	51539	43203	35641	14985	17172	37662	33648	13151	15815	27111	62317	29847	32988	39208	45944	113190	125040	159770	100840	64251
MEDP0079	S-(5-Adenosy)-L-Homocysteine	Amino acid and Its metabolomics	Amino acid derivatives	385	384.122	[M+H]+	C14H20N6O5S	A	1662100	3457400	1821700	1989100	1904900	1730700	1668400	1864300	1487300	1875400	1470900	1492300	1647300	1417700	1110900	1278500	2436200	1302600	3201200	3861400	3863000	4255000	4248400	1432400	1621200	1120800	1476100	1876200	1488300	1767000	715520	1068200	934860	808390	1020500	926780	680150	682980	601800	607900	518650
MEDP0083	Trans-4-Hydroxy-L-Proline	Amino acid and Its metabolomics	Amino acid derivatives	132.058	131.058	[M+H]+	C5H9NO3	A	1821000	1223800	2366000	1333600	1308200	1796800	8147800	8426400	7737200	7928900	7672200	8107400	10627000	8029500	5526800	5215200	12099000	8976400	4314700	3642700	4126000	3590000	3805100	6627600	1094800	1098400	1146900	938920	1030400	1187000	19740000	20626000	22580000	20247000	19219000	19528000	2566900	2861100	2332500	1347200	2757500
MEDP0087	L-Alanyl-L-Lysine	Amino acid and Its metabolomics	Amino acid derivatives	218.1	217.14	[M+H]+	C9H19N3O3	B	861010	986090	505780	779380	721520	680080	2613200	4279400	5444900	2797200	2610300	1818500	467050	618190	366220	531750	593680	431030	3408700	3956700	3447700	3562200	4107300	498600	9	9	9	9	9	9	9	9	9	9	9	9	94728	251260	75281	88770	53042
MEDP0147	1-Methylhistidine	Amino acid and Its metabolomics	Amino acid derivatives	170.1	169.085	[M+H]+	C7H11N3O2	A	643630	815760	962620	884940	1024500	1115000	2468100	2159000	2358300	3003600	2504200	2230400	6938600	9353900	7390000	10756000	10937000	7868500	737800	1017100	1034400	829510	912830	9307800	949630	1707200	917660	908140	1465300	841900	6215400	6852200	7286500	6548600	6734700	6781500	3307600	4222800	1693500	2677600	1868500
MEDP0297	5-Aminovaleric Acid	Amino acid and Its metabolomics	Amino acid derivatives	118.2	117.079	[M+H]+	C5H11NO2	B	9	9	9	9	9	9	218590	96346	70836	52717	94431	172670	27720	27005	31457	10022	19459	25288	194130	283390	238510	245890	175200	32657	14968	10345	11922	10487	17297	7049.5	52440	44070	66974	53454	56634	53282	9	9	9	9	9
MEDP0298	6-Aminocaproic Acid	Amino acid and Its metabolomics	Amino acid derivatives	132.095	131.095	[M+H]+	C6H13NO2	B	527190000	517720000	506530000	519780000	526090000	522390000	441930000	427120000	498060000	361530000	404470000	413370000	539270000	547590000	522230000	558070000	537020000	530090000	497120000	516380000	508880000	531600000	532320000	523920000	454930000	494790000	430070000	406350000	464330000	451790000	369810000	341420000	365550000	314440000	360340000	309610000	511660000	553920000	539840000	547200000	533760000
MEDP0299	7-Methyluric Acid	Amino acid and Its metabolomics	Amino acid derivatives	183	182.044	[M+H]+	C6H6N4O3	B	1568900	1600900	1707300	1625000	1555200	1750100	878650	1309900	969920	1283400	908390	1180600	1926300	1909600	1884200	1713600	1952600	1887600	1731800	1794800	1703100	1759700	1744400	1779800	1737400	1756600	1505500	1901700	1627000	1747900	1753200	1510100	1541000	1559900	1559500	1541200	2007900	1855000	1971700	1846300	1628400
MEDP0318	Kinurenine	Amino acid and Its metabolomics	Amino acid derivatives	209.1	208.085	[M+H]+	C10H12N2O3	A	8662600	10630000	6310400	5266700	8184000	6793200	1833000	1172600	1226000	963710	1130700	914360	442460	520930	685530	746260	1086200	1389700	306410	219190	219420	170260	123560	554070	322150	264490	397520	472450	3420200	46818	14905000	17479000	15914000	19246000	18212000	19961000	2147800	2759700	3021800	4058300	2865400
MEDP0326	N'-Formylkynurenine	Amino acid and Its metabolomics	Amino acid derivatives	237.1	236.08	[M+H]+	C11H12N2O4	A	370710	333570	258170	348020	702610	612560	2905100	7256100	604510	2657900	1955300	629010	47339	164420	297590	241090	222000	143500	475180	236170	307820	352940	148310	143700	19856	185320	85926	114720	179360	114920	1361700	1330800	1503200	1097500	1428000	1574300	183780	203120	216240	240200	204520
MEDP0367	γ-Aminobutyric Acid	Amino acid and Its metabolomics	Amino acid derivatives	104.06	103.063	[M+H]+	C4H9NO2	A	364270	602300	328880	437170	452280	474560	503080	912700	659980	480360	765660	932220	104440	98730	106730	83732	96414	129640	114570	91311	85045	109860	66565	98710	399050	534550	495400	451110	646490	420250	393280	417510	357550	427000	318330	401090	80536	99470	80733	85402	45511
MEDP0373	N-Acetylglycine	Amino acid and Its metabolomics	Amino acid derivatives	118	117.043	[M+H]+	C4H7NO3	B	287070000	292190000	366080000	377680000	352850000	363050000	269780000	266880000	233380000	221170000	258680000	235260000	367300000	369950000	371840000	372180000	368660000	365510000	24950000	20590000	40034000	20549000	25540000	354260000	4042900	2407800	3199300	8863700	3364500	5378500	27928000	22836000	26495000	23871000	24194000	22188000	400420000	408330000	410540000	424720000	394900000
MEDP0379	3-Hydroxyhippuric Acid	Amino acid and Its metabolomics	Amino acid derivatives	196.05	195.053	[M+H]+	C9H9NO4	B	445500	312710	431660	732110	461040	441970	15251	56327	32681	24049	35481	57875	4551.3	23704	15512	16340	10246	8641.6	1893400	2696000	1814400	2119700	1723500	14609	115910	60428	46961	20939	103680	16101	143210	112470	235630	244290	253970	160100	62205	140340	133490	84171	82506
MEDP0387	L-Homoarginine	Amino acid and Its metabolomics	Amino acids	189	188.127	[M+H]+	C7H16N4O2	B	157760	189350	126970	91627	95192	171220	423040	220770	301000	243150	400120	289870	282980	221070	218350	350940	270750	252130	222950	332360	304830	329440	298340	223130	245660	404230	422890	391730	372210	271060	5726500	6977600	6891900	7153600	7279700	6804600	501840	509740	305230	361770	242450
MEDP0409	Cys-Gly	Amino acid and Its metabolomics	Small Peptide	179	178.041	[M+H]+	C5H10N2O3S	A	481060	480600	515690	473990	412790	294840	9	9	9	9	9	9	30222	54845	50969	62230	39179	33224	878480	863300	1034600	927440	856010	23914	1102400	49041	639050	715260	292390	543140	161360	155570	256330	405800	138500	161320	544670	460370	479950	478150	505800
MEDP0519	L-Norleucine	Amino acid and Its metabolomics	Amino acids	132.102	131.095	[M+H]+	C6H13NO2	B	49444000	61543000	43153000	52651000	45906000	51685000	6687100	6282900	11956000	5477300	7249800	7167000	15890000	18850000	14161000	17263000	15291000	15303000	46152000	45424000	46516000	43821000	42085000	19844000	11345000	17973000	8748900	11661000	15294000	5434900	29963000	27375000	29735000	27104000	34130000	30862000	78495000	70422000	59442000	67856000	62595000
MEDP0525	N-Acetyl-L-alanine	Amino acid and Its metabolomics	Amino acid derivatives	132.058	131.058	[M+H]+	C5H9NO3	B	81421000	91303000	76928000	87877000	94591000	87442000	44340000	40491000	69855000	30092000	41840000	44168000	69751000	109030000	69145000	84677000	70981000	73010000	89829000	102510000	106460000	95206000	101000000	103250000	52277000	60995000	43164000	39780000	52838000	54212000	34682000	31810000	35777000	29235000	34284000	28787000	65402000	83894000	78464000	83201000	61513000
MEDP0586	N-Acetylphenylalanine	Amino acid and Its metabolomics	Amino acid derivatives	208.09	207.09	[M+H]+	C11H13NO3	A	492890	656280	337310	609180	644310	535630	1947600	1932200	5461100	1784500	2478200	1928300	378230	410970	222470	242950	368150	569540	129190	190700	121540	151040	118590	462760	444120	384080	241250	254470	363670	381220	678340	329800	767090	374800	646800	481180	273180	315470	237320	336310	209660
MEDP0587	N-Alpha-acetyllysine	Amino acid and Its metabolomics	Amino acid derivatives	189.116	188.116	[M+H]+	C8H16N2O3	A	872960	1166700	952060	901230	829100	1413500	5571600	3064800	4885500	1862600	5385000	3207900	2151200	2222500	1776000	3214600	2134700	2114200	2489000	2232100	3036000	2184700	2763300	2206900	3988900	5105900	3905800	4432000	4853100	3237000	42057000	50213000	46918000	45456000	53794000	42076000	9338300	8736500	6396700	6193300	4787300
MEDP0611	N-Acetyl-L-Histidine	Amino acid and Its metabolomics	Amino acid derivatives	198.08	197.08	[M+H]+	C8H11N3O3	A	193390	256300	231990	218450	214530	201720	2184700	1890000	2410300	1676500	1970000	2353300	493730	57450	37550	51960	255220	509990	129950	184590	155420	144760	159770	142840	1003000	1473800	918900	889630	1886100	1059800	80114	47412	95761	35907	65212	111730	277490	139070	145840	210950	168930
MEDP0637	L-phenylalanyl-L-proline	Amino acid and Its metabolomics	Amino acid derivatives	263.132	262.132	[M+H]+	C14H18N2O3	A	356220	1000200	930230	1068500	5884900	876000	11172000	11518000	10284000	5256100	9535700	10245000	1148600	8158000	18204000	9661100	6333600	27296000	338970	489990	493270	392190	352920	8692200	474830	449650	658450	909880	445330	2726500	1624900	1804100	1479900	1446400	1820200	1447600	1573800	2038700	2396900	1522200	874500
MEDP0664	L- Tyrosine methyl ester	Amino acid and Its metabolomics	Amino acid derivatives	196.2	195.09	[M+H]+	C10H13NO3	B	290350	349040	1524200	437680	456100	364760	1286300	1043600	604030	445950	828860	1225200	368230	448910	383610	302340	302920	336150	368510	431870	473090	476480	382040	387240	392530	305050	370420	380800	279130	299590	391120	312820	440380	471150	481770	528230	638120	663490	506670	654080	679610
MEDP0685	Methylcysteine	Amino acid and Its metabolomics	Amino acids	136.2	135.035	[M+H]+	C4H9NO2S	B	38993000	40843000	33630000	44245000	46484000	44938000	25178000	26976000	26974000	25460000	27960000	23927000	22035000	35289000	18980000	23396000	24143000	23785000	67696000	58750000	80679000	57077000	52525000	28306000	45864000	44173000	39949000	39256000	37821000	55792000	7842900	4445400	4982500	6272200	5714800	7024200	106430000	86732000	58593000	83626000	102840000
MEDP0752	DL-Leucine	Amino acid and Its metabolomics	Amino acids	132.095	131.095	[M+H]+	C6H13NO2	B	527190000	517720000	506530000	519780000	526090000	522390000	441930000	427120000	498060000	361530000	404470000	413370000	539270000	547590000	522230000	558070000	537020000	530090000	497120000	516380000	508880000	531600000	532320000	523920000	454930000	494790000	430070000	406350000	464330000	451790000	369810000	341420000	365550000	314440000	360340000	309610000	511660000	553920000	539840000	547200000	533760000
MEDP0849	Nα-Acetyl-L-glutamine	Amino acid and Its metabolomics	Amino acid derivatives	189.1	188.183	[M+H]+	C7H12N2O4	B	9	9	9	9	9	9	8255100	5320800	8457500	4210300	8986500	5664900	6793500	4696600	5236800	6905200	6457700	6329600	3861700	3476500	4376000	3223500	3742600	5150300	4443200	5154300	3915200	5065700	4937600	3904000	49853000	58584000	52698000	54219000	58652000	52228000	12128000	12101000	11268000	10299000	9470600
MEDP0859	Glycyl-DL-phenylalanine	Amino acid and Its metabolomics	Amino acid derivatives	223.2	222.1	[M+H]+	C11H14N2O3	A	510320	2200900	2350000	2043500	5961100	1167100	23995000	17569000	35730000	11083000	20971000	22248000	1242500	1979800	1860100	1279300	994170	4525000	385760	512580	495070	394940	405430	2135600	754280	363490	1283600	2073300	504250	728550	1101600	1281300	1143200	887470	1134300	877350	677910	1151300	2052100	735910	497260
MEDP0868	N-Methylalanine	Amino acid and Its metabolomics	Amino acid derivatives	104	103.063	[M+H]+	C4H9NO2	B	3393100	5390100	5021600	4753600	5215600	4840000	13007000	14988000	13381000	11348000	12862000	10411000	16973000	16919000	14180000	14367000	16200000	15976000	5275100	4438000	4397800	4073100	4481200	15051000	8346100	7944000	12552000	11356000	8578800	9191100	10816000	10097000	10878000	10235000	11341000	11927000	3700200	4070800	3563600	2858700	3115400
MEDP0878	N-Methyl-L-Glutamate	Amino acid and Its metabolomics	Amino acid derivatives	162.3	161.069	[M+H]+	C6H11NO4	A	220310	226680	152680	185990	248480	215610	2445100	1910200	1994000	2342900	2293800	2070200	310990	735720	550170	694170	604910	366060	919370	1308000	1206700	1298600	1583100	617210	418530	494580	186830	251900	1427500	428390	3146700	3256400	3707500	4265600	3492600	3152600	720080	1011800	701920	1024600	661900
MEDP0879	N-Methyl-D-Aspartic Acid	Amino acid and Its metabolomics	Amino acid derivatives	148.2	147.053	[M+H]+	C5H9NO4	A	49445	58821	39625	63517	44496	33231	61051	100200	63853	74340	39508	33332	105860	81138	103310	106730	111730	97744	22600	14161	19434	29981	82882	141940	113510	91999	67523	99503	143750	35113	85056	78963	62181	55062	55196	33579	39395	86856	53151	70147	35307
MEDP0891	L-Tryptophanamide	Amino acid and Its metabolomics	Amino acid derivatives	204.3	203.106	[M+H]+	C11H13N3O	A	52665	266440	173370	163850	151290	99974	85375	101680	32782	30498	83498	95744	9	9	9	9	9	9	9	9	9	9	9	9	37248	9	20017	45581	50748	28065	9	9	9	9	9	9	9	23799	42309	16461	13543
MEDP1005	β-Alanine	Amino acid and Its metabolomics	Amino acids	90.048	89.048	[M+H]+	C3H7NO2	A	6786200	6927600	3230300	3476200	3620700	5398000	24977000	16915000	23864000	20056000	17507000	16870000	7793500	9269700	8329600	7127600	6510800	6594300	13178000	14876000	14634000	15463000	17186000	7301100	19073000	17858000	19143000	16498000	18931000	28256000	13607000	15072000	14129000	15879000	17682000	15935000	11758000	9985400	10585000	13017000	7732600
MEDP1013	γ-L-Glutamate-Cysteine	Amino acid and Its metabolomics	Small Peptide	251.06	250.062	[M+H]+	C8H14N2O5S	A	164320	291220	221520	853530	409260	1265200	79456	74051	71900	17226	47876	51277	85914	60957	35485	86226	66481	41216	202020	236600	216330	207690	181700	44928	1413700	54343	4521500	4363400	931790	3555400	731960	614150	718860	1172800	671210	704770	743520	567200	378750	282490	329060
MEDP1017	2-Aminoisobutyric Acid	Amino acid and Its metabolomics	Amino acid derivatives	104	103.063	[M+H]+	C4H9NO2	A	3393100	5390100	5021600	4753600	5215600	4840000	13007000	14988000	13381000	11348000	12862000	10411000	16973000	16919000	14180000	14367000	16200000	15976000	5275100	4438000	4397800	4073100	4481200	15051000	8346100	7944000	12552000	11356000	8578800	9191100	10816000	10097000	10878000	10235000	11341000	11927000	3700200	4070800	3563600	2858700	3115400
MEDP1019	aminoisobutyric acid	Amino acid and Its metabolomics	Amino acid derivatives	104	103.063	[M+H]+	C4H9NO2	A	3393100	5390100	5021600	4753600	5215600	4840000	13007000	14988000	13381000	11348000	12862000	10411000	16973000	16919000	14180000	14367000	16200000	15976000	5275100	4438000	4397800	4073100	4481200	15051000	8346100	7944000	12552000	11356000	8578800	9191100	10816000	10097000	10878000	10235000	11341000	11927000	3700200	4070800	3563600	2858700	3115400
MEDP1020	4-Hydroxyhippurate	Amino acid and Its metabolomics	Amino acid derivatives	196.05	195.053	[M+H]+	C9H9NO4	A	445500	312710	431660	732110	461040	441970	15251	56327	32681	24049	35481	57875	4551.3	23704	15512	16340	10246	8641.6	1893400	2696000	1814400	2119700	1723500	14609	115910	60428	46961	20939	103680	16101	143210	112470	235630	244290	253970	160100	62205	140340	133490	84171	82506
MEDP1022	Threoninyl-Phenylalanine	Amino acid and Its metabolomics	Small Peptide	267.124	266.127	[M+H]+	C13H18N2O4	A	263230	420950	505340	274750	500090	317690	926590	661710	688760	535400	678870	953510	139110	90885	110420	124580	129480	217840	349830	506910	353160	428190	375030	174980	534320	192360	200120	403290	111080	233880	255700	328900	492290	433040	457820	277520	94596	120780	125690	64788	77086
MEDP1023	Tryptophan glutamic acid	Amino acid and Its metabolomics	Small Peptide	334.13	333.132	[M+H]+	C16H19N3O5	A	150700	257490	187540	169670	419430	199610	918190	512590	566300	468520	671760	1042000	157760	183910	136530	139510	124750	169880	112870	93087	98308	93831	78931	190560	145010	139880	139320	204350	109240	107260	93113	94618	104750	87116	92089	77792	164070	195030	238900	176200	114040
MEDP1024	Valyl-leucine	Amino acid and Its metabolomics	Small Peptide	231.161	230.163	[M+H]+	C11H22N2O3	A	272530	203850	575900	440050	541180	423920	18060000	8866200	13184000	7723900	7164200	12410000	212430	1084200	816680	882480	466580	1079700	303030	406390	337910	237230	253280	1102000	627260	1092800	1042200	1412900	530920	739940	883510	639560	806580	882120	871720	569870	789850	1024500	1155900	823740	545260
MEDP1025	L-Valyl-L-phenylalanine	Amino acid and Its metabolomics	Amino acid derivatives	265.145	264.147	[M+H]+	C14H20N2O3	B	168090	147900	771510	274960	242200	216640	4575500	3149700	3950100	2385200	2518900	3999700	611100	4195300	3368000	1564200	1138500	2330400	643480	945110	714800	710410	772050	1446400	244950	190830	534050	569790	185790	167700	334740	318140	357310	289400	293030	237970	456940	542730	547430	383860	302990
MEDP1061	DL-O-tyrosine	Amino acid and Its metabolomics	Amino acids	166.085	165.079	[M+H]+	C9H11NO2	A	341450000	336160000	316510000	345740000	340110000	335980000	308530000	308310000	330840000	293560000	307650000	314430000	360790000	349520000	363890000	359790000	350070000	356770000	347680000	351670000	350810000	347320000	338930000	351840000	309610000	302490000	289230000	292650000	297040000	303100000	258130000	257390000	270000000	261590000	277810000	277780000	352100000	356370000	352470000	355110000	351590000
MEDP1070	Glycyl-L-valine	Amino acid and Its metabolomics	Small Peptide	175.1	174.1	[M+H]+	C7H14N2O3	A	1761000	1740400	1804500	1596200	1476900	1953300	5672600	5130500	6417400	5420100	5710900	5443000	1411800	731950	440880	839410	817300	866340	2600500	2292000	2562700	1988200	2345200	677320	2346100	3387400	2559300	2435900	3029000	2565900	1056800	972830	926730	1055700	882020	1087300	862710	724850	647990	726840	490010
MEDP1071	Alanyl-dl-leucine	Amino acid and Its metabolomics	Small Peptide	203.129	202.132	[M+H]+	C9H18N2O3	A	58872	75202	173110	121200	184970	150540	247360	639530	388180	211720	532550	817260	104340	83194	98475	123500	117290	112980	230300	207520	237470	200490	222150	117320	187270	121710	192730	311830	106700	88827	98619	81402	133120	70420	161650	86493	253490	255970	217060	247190	218560
MEDP1080	Glycyl-tryptophan	Amino acid and Its metabolomics	Small Peptide	262.109	261.111	[M+H]+	C13H15N3O3	A	260870	673160	407530	491170	1414600	447430	1976600	1215600	3496600	1057700	1649000	1916200	124210	252560	175140	129790	107800	460540	80121	78896	84453	76671	102480	295840	203610	480330	341790	459190	150970	192700	85548	119400	85684	87647	111070	89570	727050	690610	739050	422880	447860
MEDP1126	(R)-(-)-2-phenylglycine	Amino acid and Its metabolomics	Amino acid derivatives	120.073	137.084	[M-H2O+H]+	C8H11NO	A	36928000	43456000	30922000	39169000	45338000	37000000	26829000	24543000	39074000	20562000	24942000	28248000	36211000	48090000	43367000	43729000	41722000	46154000	42267000	41908000	45645000	40083000	37559000	51423000	23074000	22011000	17667000	18488000	20641000	22521000	13988000	13601000	15852000	13544000	17046000	16212000	30957000	40834000	33443000	37621000	35624000
MEDP1144	L-Isoleucine	Amino acid and Its metabolomics	Amino acids	132.092	131.095	[M+H]+	C6H13NO2	B	483940000	472920000	476330000	487610000	495840000	480980000	412480000	400450000	458570000	330490000	381310000	392460000	498650000	508490000	483850000	517800000	497900000	483670000	532620000	521100000	530410000	496630000	494190000	495680000	432440000	467650000	401720000	371170000	428230000	442290000	323820000	299290000	328390000	308310000	321870000	311200000	509620000	522980000	487200000	516690000	495570000
MEDP1177	N-Methyl-α-aminoisobutyric acid	Amino acid and Its metabolomics	Amino acid derivatives	235.2	117.079	[2M+H]+	C5H11NO2	B	190570000	173470000	222880000	191530000	188840000	229310000	142380000	159270000	118870000	118080000	136240000	122670000	218400000	229120000	230670000	212250000	239340000	211810000	2651000	2160600	4797500	1615600	3321000	229870000	60963	11740	29071	185300	9	62275	1053800	692890	848500	942920	1014000	1094000	283210000	303960000	315970000	286340000	275600000
MEDP1216	3-methylequuric acid	Amino acid and Its metabolomics	Amino acid derivatives	194.114	193.074	[M+H]+	C10H11NO3	B	40084	50664	9	52409	57081	47222	9	9	9	9	9	9	9	9	9	9	9	9	498950	486620	420860	545470	572280	9	9	9	9	9	9	9	9	9	9	9	9	9	9	9	9	9	9
MEDP1280	S-Adenosyl-L-Methionine	Amino acid and Its metabolomics	Amino acid derivatives	399.142	399.144	[M+H]+	C15H22N6O5S	A	1236900	1043100	564800	454310	655520	688640	2998400	2582600	2245900	2390600	2320900	2425000	1563500	1087700	882140	1214400	1270000	1146600	1984000	1802400	1939500	2013600	1851900	1210700	1964800	1771600	1861500	2371000	2556400	1675700	2916700	2823200	2699400	2998300	2442200	2989200	571260	537370	504740	622050	389550
MEDP1294	L-Leucyl-L-glycine	Amino acid and Its metabolomics	Small Peptide	189.114	188.116	[M+H]+	C8H16N2O3	B	756960	770330	1293400	1190600	1573000	784410	7523800	4801200	4209400	2876800	3838700	7274700	417120	972750	404640	622500	511030	679020	957040	803330	957310	757020	896560	1018800	255790	359230	337540	428350	246770	292550	460530	494840	398610	303920	414560	301660	289590	389070	356440	243980	240360
MEDP1307	(2S, 3S) -3-methylphenylalanine	Amino acid and Its metabolomics	Amino acid derivatives	180.101	179.095	[M+H]+	C10H13NO2	B	100390	88409	120120	101180	72540	109240	989410	878120	412470	362290	604350	1171200	230720	195680	218440	201200	157610	175930	82722	115170	111670	94403	105560	202060	155420	123260	185800	257540	115500	95027	285730	304060	373910	303180	382150	274980	179880	171380	151380	189170	157840
MEDP1354	Mycosporine-serinol	Amino acid and Its metabolomics	Amino acid derivatives	262.128	261.121	[M+H]+	C11H19NO6	B	9	9	9	9	9	9	67403	27241	46436	47022	52091	30445	76481	80727	42130	53359	83538	53759	9	9	9	9	9	9	9	9	9	9	9	9	129580	74538	90753	85244	84634	110310	9	9	9	9	9
MEDP1360	Mycosporine glycine	Amino acid and Its metabolomics	Amino acid derivatives	246.1	245.09	[M+H]+	C10H15NO6	B	37939	40922	64679	42504	56857	61585	9	23224	34760	24135	11953	20525	19983	34397	38375	37406	14175	31253	34337	37949	41113	44909	37708	39547	31581	65428	31698	25234	16470	37836	9	9	9	9	9	9	55623	67173	106720	71577	89844
MEDP1362	Methyl-tyrosine	Amino acid and Its metabolomics	Amino acid derivatives	196.095	195.089	[M+H]+	C10H13NO3	B	45354000	135510000	58524000	65704000	59425000	22481000	4111800	3416300	5697000	4384300	4855900	6781200	13559000	22095000	11275000	16782000	9629000	11851000	112420000	131300000	127900000	116150000	124650000	15823000	18420000	10399000	12329000	20344000	13407000	14636000	7601400	10246000	8028200	10331000	12385000	10549000	159080000	125160000	121670000	159920000	189580000
MEDP1367	Alanine tyrosine	Amino acid and Its metabolomics	Small Peptide	253.118	252.111	[M+H]+	C12H16N2O4	A	99294	100490	1054400	315980	236140	120530	2131100	1382400	1326500	859720	1153700	1318600	55522	147490	69650	71980	37706	107310	9	9	9	9	9	9	99594	82282	86698	110730	65719	69852	139770	207600	115470	120250	144450	64488	92942	114650	167500	102030	81761
MEDP1490	Cis-4-Hydroxy-D-Proline	Amino acid and Its metabolomics	Amino acid derivatives	132	131.058	[M+H]+	C5H9NO3	A	1312200	1050900	1243400	954570	899050	1351000	3300400	3942500	3528200	3509200	3730600	3506100	2313900	2373100	2263700	2043100	2588800	1985700	1701500	1842800	1794200	1909500	1885200	2099900	520520	591870	556690	526740	555780	354210	7577900	8331200	8107300	7954000	7910000	8021200	1185400	1221300	920430	1031300	794180
MEDP1506	Leu-Val	Amino acid and Its metabolomics	Small Peptide	231	230.163	[M+H]+	C11H22N2O3	B	391580	552680	1212300	1022400	1668800	639890	11026000	6139800	8617400	4645800	6726100	8617400	879650	2027800	1065800	1132300	546000	1810200	292770	359170	327770	255030	286560	1979700	203070	347780	406530	482090	290110	557920	1208600	902260	1039700	774260	913720	759300	541960	1375700	1281100	569260	340410
MEDP1507	Phe-Asn	Amino acid and Its metabolomics	Small Peptide	280	279.122	[M+H]+	C13H17N3O4	B	186000	338580	361220	317710	330110	184970	1721100	1279500	1296400	819760	858410	1680200	75901	120780	160690	92261	96176	244210	96072	79545	100190	88592	57558	122580	76691	137250	77442	67610	118280	107500	9	9	9	9	9	9	689390	606170	509810	342320	358430
MEDP1508	Phe-Met	Amino acid and Its metabolomics	Small Peptide	297	296.119	[M+H]+	C14H20N2O3S	B	161320	349980	309160	281080	363280	144020	1929800	1906300	1550200	1079900	1438100	1813800	53428	114790	56466	118330	94172	160520	324500	252950	103020	110090	159590	117810	77227	57122	76676	109470	51264	72855	164350	191550	208080	166720	300620	236660	288460	290120	352150	228660	169270
MEDP1509	Glu-Met	Amino acid and Its metabolomics	Small Peptide	279	278.094	[M+H]+	C10H18N2O5S	B	2584800	7669600	3312600	3246700	3130500	2294900	1631400	2142200	3273900	1068400	1461700	1304600	315210	228250	157300	238850	279430	199960	93736	115200	71683	125100	93388	327080	167720	224210	318720	498510	229060	259140	12281000	15251000	14747000	12968000	13312000	11732000	2621800	3886000	3773600	2181300	1559500
MEDP1510	Asp-phe	Amino acid and Its metabolomics	Small Peptide	281	280.106	[M+H]+	C13H16N2O5	B	319540	563840	289790	393910	463830	384310	1717900	1322100	6439600	1435300	2455900	1952600	211780	305350	374160	307860	237330	456690	1910800	2451900	1585900	1746300	1501400	332600	9	9	9	9	9	9	406630	316650	423550	333230	353460	327690	376920	364030	458620	371160	306440
MEDP1511	Met-Glu	Amino acid and Its metabolomics	Small Peptide	279	278.094	[M+H]+	C10H18N2O5S	B	742500	2428900	1026600	896640	870790	674440	463230	553050	959310	303070	459570	364390	96748	70235	47858	71897	94660	61590	32436	41452	17353	24882	26720	100330	41726	40918	63034	121310	54715	69777	3402600	4399600	4516500	3727300	3918000	2979400	677370	1018300	1078200	672750	448500
MEDP1512	Phe-Val	Amino acid and Its metabolomics	Small Peptide	265	264.147	[M+H]+	C14H20N2O3	B	413850	690270	1513900	1107100	1241100	708510	7583100	6257000	4652900	3265200	5318600	8234700	430350	381230	290860	467160	295760	776370	227400	297800	320360	264030	282350	514420	105860	243540	204740	175880	141060	191390	387540	453340	325470	235640	327980	347200	320530	511010	387740	352310	258390
MWC10154083	Cysteic Acid	Amino acid and Its metabolomics	Amino acids	187.999	169.004	[M+F]-	C3H7NO5S	A	14389000	20878000	17743000	19168000	17623000	19116000	17446000	15523000	20053000	15557000	18745000	18596000	7352700	7276800	6693400	7741600	7478500	6212300	24918000	25207000	25491000	22104000	21577000	8975100	1303000	2602300	1761900	1541700	2209500	1561800	9307600	11305000	10935000	8139100	10680000	11097000	3346100	2420100	2472700	2891700	1925500
MWCL0000363	Cyclopeptin	Amino acid and Its metabolomics	Small Peptide	281.136	280.121	[M+H]+	C17H16N2O2	B	3574000	5442900	3418000	4014000	5074100	3325600	1255600	1431400	1293600	1320700	1539600	1538900	3714200	2619100	2170800	4694600	3009400	2733100	4115800	5343700	5320900	7177800	4689200	3098700	4955700	4778300	7244300	5270100	6175200	4777100	3425400	3194200	3260800	2399600	3312200	4544600	6149100	5146800	4041300	4090300	6083000
MWC10001531	N-Hydroxy-L-isoleucine	Amino acid and Its metabolomics	Amino acid derivatives	295.187	147.089	[2M+H]+	C6H13NO3	A	287450	825750	1697800	1058200	1225900	433950	2311900	1093600	1852000	827760	1393500	1913100	316980	531050	289920	268160	217160	575560	856260	644160	517560	678800	384010	599680	44031	76233	118690	217340	43206	52619	383390	408700	390560	324380	319050	310170	260750	290620	490120	328060	215670
MWC10129146	Val Ala	Amino acid and Its metabolomics	Small Peptide	399.223	188.116	[2M+Na]+	C8H16N2O3	B	9	9	9	9	9	9	92937	129230	60710	9	57463	104980	9	9	9	9	9	9	9	9	9	9	9	9	92099	74759	107620	202130	90979	93011	52251	52206	22983	19551	51740	30129	9	9	9	9	9
MWC10129175	Pro Thr	Amino acid and Its metabolomics	Small Peptide	217.107	216.111	[M+H]+	C9H16N2O4	B	109060	130640	147840	178610	338450	168430	3008500	4095200	1551100	713860	1204800	1225800	196740	228760	210300	183840	192390	240290	128480	163540	121700	137150	135020	270340	178700	243470	275090	317220	189460	658260	512330	470310	474660	383860	469820	314340	210170	318100	310380	250650	175610
MWC10129176	Val Val	Amino acid and Its metabolomics	Small Peptide	217.154	216.147	[M+H]+	C10H20N2O3	B	307780	314310	1237900	479610	649550	389480	7981200	5426400	6365200	3252700	4762600	7906000	194010	1085300	784160	710570	348330	943060	190660	314020	265870	191930	229060	1103400	179820	229430	300050	404530	184460	282020	4392900	2577200	3046700	2714800	2850200	2466000	683260	876090	770120	645110	498580
MWC10129182	Val Thr	Amino acid and Its metabolomics	Small Peptide	219.134	218.127	[M+H]+	C9H18N2O4	B	381150	596980	378670	268570	402390	314370	7813300	7177100	2387700	2392700	4768700	2749400	282530	384510	288310	297530	455760	311530	1289100	1133000	1313500	1114400	1339400	444250	97071	119480	203330	163720	174730	105820	5782500	6664100	6314600	6006700	7096000	7008700	1470900	1296200	1300300	903590	981320
MWC10129183	Ser Leu	Amino acid and Its metabolomics	Small Peptide	219.133	218.127	[M+H]+	C9H18N2O4	B	264500	177530	903710	607100	590610	368960	15456000	8888000	12203000	5841800	6486800	13356000	613760	1108500	883410	947620	595920	2094500	76418	129500	9	9	9	1224500	431370	528650	909170	1384300	384320	696360	280400	462010	254910	190320	239980	261770	833710	772960	1991300	548490	426970
MWC10129195	Pro Asn	Amino acid and Its metabolomics	Small Peptide	274.075	229.106	[M-H+2Na]+	C9H15N3O4	B	9	9	9	9	9	9	516380	453820	265660	513920	505460	557140	9	9	9	9	9	9	9	9	9	9	9	9	50904	148710	153870	324650	117160	5176400	9	9	9	9	9	9	9	9	9	9	9
MWC10129217	Ala Phe	Amino acid and Its metabolomics	Small Peptide	237.123	236.116	[M+H]+	C12H16N2O3	B	189850	459580	793960	521120	685340	345280	5956800	5939700	2962400	2571100	3700300	6092200	97478	141700	171050	178150	104260	260560	125370	128500	173780	133210	142980	206020	145850	257460	170080	196800	175040	186210	403910	684060	475830	414000	536980	606840	219610	247190	302420	222100	231220
MWC10129226	Ile Leu	Amino acid and Its metabolomics	Small Peptide	245.185	244.179	[M+H]+	C12H24N2O3	A	704070	594230	2288800	1629600	1647300	817830	11236000	4996400	8234000	3148300	4400900	8141000	621070	2302100	2019900	1344400	610480	3504900	408100	266920	281050	267230	262200	2154000	201530	312130	571510	689280	198800	364800	576170	535010	562620	411390	498080	340080	560760	773360	1350900	705390	497950
MWC10129232	Asn Ile	Amino acid and Its metabolomics	Small Peptide	246.144	245.138	[M+H]+	C10H19N3O4	B	165710	291910	643450	417990	714570	250880	4898800	3127600	3408900	1743900	2051000	4578700	228580	369130	211060	308180	142920	543510	104180	103250	85976	69227	89426	413620	93942	63259	148720	196090	72227	95877	62878	145580	70839	42674	89745	59137	171110	159390	385770	173980	111820
MWC10129271	Tyr Ala	Amino acid and Its metabolomics	Small Peptide	253.118	252.111	[M+H]+	C12H16N2O4	B	92844	180370	1761300	448800	381090	162640	3054400	1456400	2086200	1433800	1886300	2515600	108630	253050	77188	111230	98672	127590	51861	52137	9	33909	63747	219810	178100	85531	185410	224890	103410	188980	217900	226090	153600	129540	190270	174440	180350	98909	255360	160790	141230
MWC10129329	Ile Met	Amino acid and Its metabolomics	Small Peptide	245.132	262.135	[M+H-H2O]+	C11H22N2O3S1	B	67398	68882	84819	68517	89616	91788	61197	73297	79610	92145	75455	53904	101570	110360	106420	103830	76358	73223	78400	82986	94942	75476	77974	94978	114520	118900	99261	101120	98471	92923	74353	70969	65340	89756	93965	117090	86772	103850	113660	120730	93773
MWC10129337	Ala Ser Ser	Amino acid and Its metabolomics	Small Peptide	281.15	263.112	[M+NH4]+	C9H17N3O6	B	246010	540000	537790	457880	1009500	452540	5734500	4605000	4361100	2448600	4546200	5403800	216790	236830	235390	253480	217100	415530	732030	645420	680900	706350	507070	238690	281960	233830	282130	423600	186560	213910	606850	670280	665770	549300	642750	570120	341870	429700	499590	379300	279430
MWC10129349	Phe Cys	Amino acid and Its metabolomics	Small Peptide	310.131	268.088	[M+CH3CN+H]+	C12H16N2O3S1	B	275380	326680	343980	367070	466360	324430	1418200	2322200	985810	1045000	1418300	1487600	362020	583380	651010	641870	710150	834030	296900	297440	342690	253620	249880	460280	282900	270840	302240	411220	272800	324580	5926600	4335700	5243700	4784700	5860900	4491600	544470	701630	739810	605760	641470
MWC10129369	Thr Pro Gly	Amino acid and Its metabolomics	Small Peptide	337.15	273.132	[M+CH3CN+Na]+	C11H19N3O5	B	180230	198850	498970	572560	468470	256320	834260	589210	1289700	510940	876100	983150	98704	288240	130140	230880	145980	194460	61564	111010	71659	96130	95469	291730	96299	52100	129020	181650	38665	39741	209810	316970	232410	297670	337700	347270	427620	518210	631500	263150	294850
MWC10129407	Val Ala Ser	Amino acid and Its metabolomics	Small Peptide	293.184	275.148	[M+NH4]+	C11H21N3O5	B	9	9	9	9	9	9	622690	111940	175910	128730	104860	179420	9	9	9	9	9	9	9	9	9	9	9	9	9	9	9	9	9	9	9	9	9	9	9	9	9	9	9	9	9
MWC10129442	Pro Tyr	Amino acid and Its metabolomics	Small Peptide	320.16	278.127	[M+CH3CN+H]+	C14H18N2O4	B	116120	171150	110720	131280	185800	132610	668210	514590	1535500	361670	931330	775050	58868	200440	9	95575	104140	336750	9	9	9	9	9	9	63350	38585	66805	60391	37071	40692	226440	258280	265780	215050	235810	251980	65985	87268	90892	42864	16073
MWC10129454	Phe Asp	Amino acid and Its metabolomics	Small Peptide	281.113	280.106	[M+H]+	C13H16N2O5	B	695700	761270	529920	676110	1370500	687830	3540700	2839000	8911600	2558200	5128400	4051300	245430	532720	628550	485470	326660	745070	2073700	3204300	1937700	2262800	2148100	520630	236290	125550	302250	429870	89823	159260	700940	642410	657090	550810	743720	549180	566580	555870	884400	568690	422310
MWC10129461	Tyr Thr	Amino acid and Its metabolomics	Small Peptide	324.158	282.122	[M+CH3CN+H]+	C13H18N2O5	B	252400	291660	5122000	1184400	775860	192640	1141600	1380300	932510	1772200	1218200	862670	28895	64784	440820	440840	456580	435010	9	9	9	9	9	9	9	9	9	9	9	9	9	9	9	9	9	9	9	9	9	9	9
MWC10129503	Val Val Ala	Amino acid and Its metabolomics	Small Peptide	288.19	287.185	[M+H]+	C13H25N3O4	B	9	9	9	9	9	9	9	9	9	9	9	9	153480	1062100	1956300	2709400	2591700	2428900	9	9	9	9	9	792380	9	9	9	9	9	9	9	9	9	9	9	9	9	9	9	9	9
MWC10129507	Ile Arg	Amino acid and Its metabolomics	Small Peptide	288.201	287.196	[M+H]+	C12H25N5O3	B	102950	254940	772870	342690	378870	202740	1195000	826440	1104400	501200	698020	1012000	61932	217480	84861	82593	69378	153200	42869	56508	53429	48237	51573	159420	68212	38997	100860	163210	46341	50592	47791	85250	52163	56278	63610	28360	164830	179660	177460	115110	153150
MWC10129517	Arg Asn	Amino acid and Its metabolomics	Small Peptide	289.163	288.155	[M+H]+	C10H20N6O4	B	9	9	9	9	9	9	9	9	9	9	9	9	52306	83352	104210	56620	78352	76372	9224.6	12747	18879	9411.5	28336	73421	9	9	9	9	9	9	9	9	9	9	9	9	9	9	9	9	9
MWC10129518	Asn Arg	Amino acid and Its metabolomics	Small Peptide	289.162	288.155	[M+H]+	C10H20N6O4	B	9	9	9	9	9	9	9	9	9	9	9	9	9	9	9	9	9	9	22704	13474	34478	12346	12664	21415	33423	27732	15774	32700	42969	61797	9	9	9	9	9	9	9	9	9	9	9
MWC10129617	Phe Glu	Amino acid and Its metabolomics	Small Peptide	295.128	294.122	[M+H]+	C14H18N2O5	B	1554400	2402700	1377000	2172900	5940000	2646500	4539700	2957500	10672000	2319000	3874400	3162700	866780	1455100	1169800	895280	1092300	1359200	733110	610110	688570	517150	491640	1695600	365950	463980	437030	521860	459330	320240	9302600	8925600	12066000	10374000	14428000	12051000	4924000	6692500	5348700	4988800	3420800
MWC10129619	Ile Tyr	Amino acid and Its metabolomics	Small Peptide	295.184	294.158	[M+H]+	C15H22N2O4	B	302040	794580	1629700	1081800	1193900	400800	2048900	1005200	2092900	770120	1424400	1693900	294180	465290	263580	307570	165760	548610	744580	660580	547910	643510	448610	518830	78814	52352	134290	201540	73880	35866	405350	385170	433280	320520	317070	246590	277170	320720	514950	339560	197440
MWC10129631	Met Phe	Amino acid and Its metabolomics	Small Peptide	297.127	296.119	[M+H]+	C14H20N2O3S1	B	32502	21832	43534	50680	34475	38218	341030	290590	270820	179730	238160	349160	11992	15995	20475	22168	15099	25766	30620	24416	13841	13771	23930	21776	19585	10656	25092	36398	5542.4	4438.1	4454.6	15986	14207	9126.9	16405	6211.4	23505	27990	19504	30669	20624
MWC10129668	Gly Pro Glu	Amino acid and Its metabolomics	Small Peptide	266.113	301.127	[M+H-2H2O]+	C12H19N3O6	B	9	9	9	9	9	9	81938	9	9	28633	55904	201430	9	9	9	9	9	9	1682200	1781700	1710900	2009700	1116600	9	9	9	9	9	9	9	9	9	9	9	9	9	9	9	9	9	9
MWC10129679	Leu Gly Leu	Amino acid and Its metabolomics	Small Peptide	302.206	301.2	[M+H]+	C14H27N3O4	B	86599	335160	2530100	503210	601090	430460	667870	197820	419780	391430	496660	271120	7765300	41834000	38489000	68180000	63102000	50453000	37394	40682	32576	31563	25974	32277000	100970	108040	302000	211200	185130	129030	39266	116730	50854	107120	167170	113300	22263	44525	101910	20727	18434
MWC10129761	Leu Thr Ala	Amino acid and Its metabolomics	Small Peptide	345.21	303.179	[M+CH3CN+H]+	C13H25N3O5	B	111460	106630	488320	220890	171210	93502	783410	691840	397870	381020	585390	790060	115700	441720	1205000	953110	978540	740770	13563	9	30119	22619	15847	430840	226530	200190	350040	690240	233600	415120	117680	144260	102310	108980	178630	174540	9	9	9	9	9
MWC10129772	Ile Thr Ala	Amino acid and Its metabolomics	Small Peptide	345.213	303.179	[M+CH3CN+H]+	C13H25N3O5	B	242970	335060	1008500	867060	695840	342110	9	9	9	9	9	9	9	9	9	9	9	9	9	9	9	9	9	9	9	9	9	9	9	9	9	9	9	9	9	9	9	9	9	9	9
MWC10129819	Thr Trp	Amino acid and Its metabolomics	Small Peptide	306.146	305.138	[M+H]+	C15H19N3O4	B	96381	276060	389590	284740	447350	175400	1134100	663210	1249500	448220	634590	1143100	44564	62871	107540	34497	46087	181430	60455	32925	35722	26863	33677	91272	103170	58025	157870	188850	93860	32155	40725	66200	99400	60889	82159	57523	87727	173500	213870	83410	60909
MWC10130017	Pro Cys Val	Amino acid and Its metabolomics	Small Peptide	318.149	317.141	[M+H]+	C13H23N3O4S1	B	42126	24356	251730	73298	201290	58481	1563400	1458400	1292700	1031700	1038200	1544900	84207	421750	263360	334030	250380	684220	57515	85679	31927	55901	36320	435760	294330	194720	534610	595760	294210	318580	130660	378580	74811	106710	191020	168390	379920	392910	661510	217640	164580
MWC10130052	Ile Trp	Amino acid and Its metabolomics	Small Peptide	318.183	317.174	[M+H]+	C17H23N3O3	B	100750	240570	381070	193120	282120	149330	382020	234750	542770	174150	396700	394370	72328	193580	116780	100850	79413	216720	22427	25252	14369	16532	18544	180440	17100	71430	61448	69070	48204	37391	56972	49466	99492	46473	57278	49670	60573	131910	131600	66254	49680
MWC10130053	Leu Val Ser	Amino acid and Its metabolomics	Small Peptide	318.201	317.195	[M+H]+	C14H27N3O5	A	318470	68961	116330	162610	384910	90224	428570	311450	603150	167300	354120	665820	86113	140530	171710	243180	174680	253110	40056	45282	9	9	56759	135920	164870	58432	141050	405880	96187	498000	9	9	9	9	9	9	5583600	3071100	4015800	3137900	2786500
MWC10130077	Trp Asn	Amino acid and Its metabolomics	Small Peptide	319.14	318.133	[M+H]+	C15H18N4O4	B	51684	33337	9	49039	22526	32366	15296	22423	17818	30132	9620.7	23953	19101	13659	22352	10726	9962.8	19896	25943	21878	15169	28765	15748	15602	3609.2	7875.8	9	18692	9872.1	11220	35793	35379	57745	16179	20196	13319	16866	13176	9	9	35604
MWC10130129	Gly Met Ile	Amino acid and Its metabolomics	Small Peptide	366.167	319.157	[M+HCOO+2H]+	C13H25N3O4S1	B	9	9	9	9	9	9	193520	137040	96910	71699	128180	274380	14649	9	19660	12191	14828	36000	9	9	9	9	9	9	9	9	9	9	9	9	20583	16703	39270	19822	32435	17878	108780	213650	102890	102860	34537
MWC10130232	Ala Pro His	Amino acid and Its metabolomics	Small Peptide	341.188	323.159	[M+NH4]+	C14H21N5O4	B	9	9	2889900	123620	25021	9	9	9	9	9	9	9	9	9	9	9	9	9	11523	16896	23243	20229	11237	9356.6	9	9	9	9	9	9	9	9	9	9	9	9	9	9	9	9	9
MWC10130324	Val Pro Asp	Amino acid and Its metabolomics	Small Peptide	376.175	329.159	[M+HCOO+2H]+	C14H23N3O6	B	83709	86912	124890	62148	96900	98077	2550500	2254400	2909000	1042600	1722000	2828400	58324	74065	36522	87639	32000	15467	51314	49978	52960	45057	55868	82259	62644	9	49277	55533	19586	23065	80649	94068	68147	48718	90305	95441	195250	387880	533930	218680	150330
MWC10130426	Leu Ser Leu	Amino acid and Its metabolomics	Small Peptide	373.243	331.211	[M+CH3CN+H]+	C15H29N3O5	B	119070	119350	202320	160470	254960	138100	338510	230680	273920	139920	443890	418690	52559	160000	152880	129510	122960	132990	19176	28086	9	9	9	129490	92669	132630	174510	321210	70347	97357	88236	184720	106190	108850	145460	152470	187920	135000	190580	108470	59225
MWC10130587	Ser Thr Gln	Amino acid and Its metabolomics	Small Peptide	381.167	334.149	[M+HCOO+2H]+	C12H22N4O7	B	12081	15493	9	9377.9	7107.3	24647	14023	9187.3	13273	14636	11979	11914	149940	171260	143040	177650	109130	128140	9	9	4095	9	9	177570	9	24122	6898	2513.4	10752	9	9	9	9	9	9	9	9	9	9	9	9
MWC10130632	Thr Leu Cys	Amino acid and Its metabolomics	Small Peptide	358.149	335.151	[M+Na]+	C13H25N3O5S1	B	109100000	89522000	93527000	84914000	91170000	103340000	21614	17378	73648	27902	9	42622	102260	229310	104840	128350	105810	68961	179650	189800	135940	194780	153930	229880	56415	12839	15977	13682	9319.4	17153	39829	39198	58888	45671	56069	50176	38371	40464	32121	19395	11895
MWC10130640	Leu Gly Phe	Amino acid and Its metabolomics	Small Peptide	336.192	335.185	[M+H]+	C17H25N3O4	B	25027	46152	251460	165720	162260	47270	423270	371600	449910	271700	382360	509300	755150	8706500	15455000	30899000	22124000	19821000	22916	30320	28106	27394	23629	6263800	51226	23609	116660	173010	38013	29400	27798	29695	25880	35253	30948	27495	48592	88903	138410	49209	37129
MWC10130856	Leu Val Leu	Amino acid and Its metabolomics	Small Peptide	344.254	343.247	[M+H]+	C17H33N3O4	B	9	9	9	9	9	9	9	9	9	9	9	9	9	9	9	9	9	9	17464	19490	18395	19012	15537	9	9	9	9	9	9	9	9	9	9	9	9	9	9	9	9	9	9
MWC10130875	Tyr Tyr	Amino acid and Its metabolomics	Small Peptide	345.145	344.137	[M+H]+	C18H20N2O5	B	518360	846040	922240	1023400	1631800	1290200	1915100	1350000	2093700	868270	1224400	1676100	47807	188560	168360	144380	94537	212330	4474500	3214400	2941600	4037800	2791200	212040	140290	57463	225080	202010	120710	64217	218840	380800	225930	195380	224750	251250	1425000	1481700	2237000	1292700	882960
MWC10130939	Leu Val Asp	Amino acid and Its metabolomics	Small Peptide	346.204	345.19	[M+H]+	C15H27N3O6	B	9	9	9	9	9	9	9	9	9	9	9	9	9	9	9	9	9	9	9	9	9	9	9	9	9	9	9	9	9	9	9	9	9	9	9	9	9	9	9	9	9
MWC10130940	Glu Val Val	Amino acid and Its metabolomics	Small Peptide	346.195	345.19	[M+H]+	C15H27N3O6	B	9	9	9	9	9	9	341120	239490	232040	197640	265070	1010400	9	9	9	9	9	9	5833.6	9	8323	13860	9327.2	20071	71908	42530	69522	122660	9	9	36254	27804	34306	23407	32491	18479	9	9	9	9	9
MWC10131063	Thr Pro Met	Amino acid and Its metabolomics	Small Peptide	394.167	347.151	[M+HCOO+2H]+	C14H25N3O5S1	B	9	15170	21548	25379	32198	12070	76035	110040	105570	55658	219570	131230	9	9	9	9	9	9	9	9	9	9	9	9	9	9	9	9	9	9	25462	34071	33942	21587	25410	32962	9	9	9	9	9
MWC10131068	Glu Ile Ser	Amino acid and Its metabolomics	Small Peptide	389.202	347.169	[M+CH3CN+H]+	C14H25N3O7	B	9	9	9	9	9	9	547220	232300	287230	808360	221500	293250	14920	26990	17628	18283	17997	37682	9	9	9	9	9	9	9	8575.1	7904.5	28711	9	9	9	9	9	9	9	9	34634	17722	11433	17693	6246.2
MWC10131214	Ala Phe Leu	Amino acid and Its metabolomics	Small Peptide	350.206	349.2	[M+H]+	C18H27N3O4	A	9	9	9	9	9	9	298500	201070	354220	172860	264340	421460	320870	7664600	6331800	9102400	11414000	8639400	9	9	9	9	9	2078000	9	9	9	9	9	9	9	9	9	9	9	9	77189	111190	123410	39084	32215
MWC10131408	His Ser Asn	Amino acid and Its metabolomics	Small Peptide	357.159	356.144	[M+H]+	C13H20N6O6	B	9	9	9	9	9	9	9	9	9	9	9	9	9	9	9	9	9	9	419270	410090	221910	1053400	102380	9	9	9	9	9	9	9	9	9	9	9	9	9	9	9	9	9	9
MWC10131492	Asp Pro Lys	Amino acid and Its metabolomics	Small Peptide	381.177	358.185	[M+Na]+	C15H26N4O6	B	9	9	9	9	9	9	40342	43564	60421	12938	54395	37007	112920	117450	79085	94342	64084	89073	20974	16444	20321	15926	30314	128010	9	9	9	9	9	9	44311	9	23771	19207	27858	20524	9	9	9	9	9
MWC10131500	Ile Leu Asn	Amino acid and Its metabolomics	Small Peptide	359.227	358.222	[M+H]+	C16H30N4O5	B	9	108920	83794	93268	167600	73434	9	9	9	9	4468100	9	272360	90436	43266	86346	121990	203180	9	24123	9	9	9	76684	9	9	9	9	9	9	9	9	9	9	9	9	9	9	9	9	9
MWC10131555	Thr His Cys	Amino acid and Its metabolomics	Small Peptide	382.111	359.126	[M+Na]+	C13H21N5O5S1	B	9	9	9	9	9	9	9	9	9	9	9	9	9	9	9	9	9	9	9	9	9	9	9	9	9	9	9	9	9	9	9	9	9	9	9	9	9	9	9	9	9
MWC10131593	Asp Leu Leu	Amino acid and Its metabolomics	Small Peptide	360.211	359.206	[M+H]+	C16H29N3O6	B	69670	105670	234410	165970	177430	74704	1465300	1171600	1312600	593520	1072400	1423000	151300	410470	151750	208460	95340	219590	40591	56269	43517	39861	40987	416150	179180	108990	150690	177780	93931	83598	66233	103580	48210	54699	76373	46608	126950	187900	351070	138960	78862
MWC10131747	Val Met Ile	Amino acid and Its metabolomics	Small Peptide	344.198	361.204	[M+H-H2O]+	C16H31N3O4S1	B	518990	716620	336990	457700	583510	504120	1431800	1039600	802470	686150	556010	1391000	126400	128150	36716	101950	78574	69674	374060	360390	418430	342130	297500	150090	94857	165440	98831	90811	192330	73953	209810	243800	206970	205920	258280	271620	719290	541670	477890	605690	569460
MWC10131790	Ile Cys Gln	Amino acid and Its metabolomics	Small Peptide	409.177	362.162	[M+HCOO+2H]+	C14H26N4O5S1	B	3916.8	54281	19396	3308.4	31519	9939.7	9	9	9	5255.5	2829	9	8754.3	6991.9	3909.3	1537.3	4010.4	13717	9	2959	4801.3	9	1124.8	5806	20977	39362	33278	49603	23752	25888	4503.2	6046.9	1011.7	9	9	8923.9	3491.6	5243.3	10171	1651	3144.5
MWC10131941	Phe Ser Ile	Amino acid and Its metabolomics	Small Peptide	366.202	365.195	[M+H]+	C18H27N3O5	B	60241	208010	201980	85900	155430	34977	9	9	9	9	9	9	1525800	5907300	5863000	5221200	5954700	5886700	9	9	9	9	9	5079900	9	9	9	9	9	9	9	9	9	9	9	9	14846	5894.1	9	9	13221
MWC10132082	Thr His Leu	Amino acid and Its metabolomics	Small Peptide	392.195	369.201	[M+Na]+	C16H27N5O5	B	9	9	9	9	9	9	9	9	9	9	9	9	29349	4434.8	9	9	94758	22423	9	9	9	9	9	9	9	9	9	9	9	9	9	9	9	9	9	9	989850	928600	536820	847090	642980
MWC10132135	Ile Cys His	Amino acid and Its metabolomics	Small Peptide	394.16	371.163	[M+Na]+	C15H25N5O4S1	B	29676	48574	50098	38382	42763	34349	220010	273310	341830	100270	389030	369670	15790	21760	28294	34867	25396	26607	2039000	5072700	5113500	3031200	2181900	30954	41611	24800	35938	37731	25159	21780	42243	66511	53991	53351	51243	35002	63211	55864	46591	42561	45935
MWC10132163	Lys Pro Glu	Amino acid and Its metabolomics	Small Peptide	337.192	372.201	[M+H-2H2O]+	C16H28N4O6	B	15271	77360	128200	63757	68719	15034	146580	80496	82574	38420	50982	70459	15843	9	14521	15952	13075	23803	66615	150220	77012	66161	49983	19655	64933	54573	93291	119950	57398	94970	9	9	9	9	9	9	14206	22554	22760	18792	13301
MWC10132228	Leu Leu Glu	Amino acid and Its metabolomics	Small Peptide	374.23	373.221	[M+H]+	C17H31N3O6	B	9	9	9	9	9	9	1645900	1308900	461950	376850	464330	1583500	9	9	20658	49344	37576	31029	9	9	9	9	9	9	9	9	9	9	9	9	9	9	9	9	9	9	9	9	9	9	9
MWC10132283	Val Glu Gln	Amino acid and Its metabolomics	Small Peptide	421.196	374.18	[M+HCOO+2H]+	C15H26N4O7	B	252550	313220	214130	225670	222420	268340	9	19248	35267	15356	5578	9834.6	52780	73634	54307	54434	59286	47253	185480	213130	237200	226480	191030	74872	32614	47694	25293	19506	51080	9282.2	119700	113940	114690	132970	170310	146820	329460	307670	246600	297250	274730
MWC10132326	Asp Leu Lys	Amino acid and Its metabolomics	Small Peptide	375.226	374.217	[M+H]+	C16H30N4O6	B	151340	142280	265540	138680	215540	79078	1290600	1043700	969020	548820	682380	1494000	105510	247080	116810	135580	93471	137360	89599	107070	85752	70411	88639	266580	62246	41299	100100	122410	60660	63026	36765	33368	33237	39137	27765	39604	196530	459050	423210	235430	116980
MWC10132328	Ile Asp Lys	Amino acid and Its metabolomics	Small Peptide	357.214	374.217	[M+H-H2O]+	C16H30N4O6	B	91153	51741	9	123860	210990	108850	413760	271690	380970	169490	262570	595900	77421	1061800	3317600	607150	270950	4892400	19441	38304	43315	35975	19491	1100000	117890	81739	177830	264670	62757	1746100	110170	82482	68593	73385	88670	73688	156210	264650	339010	184400	89038
MWC10132446	Asp Arg Ser	Amino acid and Its metabolomics	Small Peptide	377.185	376.171	[M+H]+	C13H24N6O7	B	9	9	9	9	9	9	182400	9	157100	77913	9	163530	9	9	9	9	9	9	9	9	9	9	9	9	9	9	9	9	9	9	9	9	9	9	9	9	1612800	2347900	3914200	908000	1615100
MWC10132484	Val Met Lys	Amino acid and Its metabolomics	Small Peptide	377.214	376.214	[M+H]+	C16H32N4O4S1	B	226550000	178910000	177500000	171700000	192750000	210540000	16773000	14370000	18425000	17161000	16009000	18170000	22855000	25143000	23280000	23192000	23392000	31716000	96799000	69366000	47328000	56293000	54133000	29111000	33013000	30445000	26445000	26812000	25226000	19405000	4024200	4467400	4950100	3487600	4435100	4358400	5144100	6858300	5625500	7810500	6252300
MWC10132540	Thr-His-OH	Amino acid and Its metabolomics	Small Peptide	417.075	378.118	[M+K]+	C16H18N4O7	B	9	9	20420	6909.3	14099	11099	42581	31003	26534	30379	14310	24239	16530	9	9	9	9	9	9	9	9	9	9	9	8215.9	38575	25644	27344	18852	13733	9	9	9	9	9	9	25998	15326	20975	43006	19252
MWC10132576	Glu Met Thr	Amino acid and Its metabolomics	Small Peptide	426.15	379.141	[M+HCOO+2H]+	C14H25N3O7S1	B	33544	120620	58531	68944	47120	73066	9	9	9	9	9	9	9	9	9	9	9	9	22994	30429	14217	31207	31872	9	78109	61093	50702	69840	57548	74727	9	9	9	9	9	9	54770	36289	40585	36336	54014
MWC10132583	Thr Pro Tyr	Amino acid and Its metabolomics	Small Peptide	380.179	379.174	[M+H]+	C18H25N3O6	B	9	9	9	9	9	9	9	9	9	9	9	9	9	9	9	9	9	9	9	9	9	9	9	9	352210	823560	939580	107470	1396300	912260	9	9	9	9	9	9	9	9	9	9	9
MWC10132634	Ser Phe Lys	Amino acid and Its metabolomics	Small Peptide	381.21	380.206	[M+H]+	C18H28N4O5	B	9	9	9	9	9	9	9	9	9	9	9	9	9	9	9	9	9	9	8597.8	6535.8	6138.9	4497.1	13473	9	101620	229850	295420	31581	163600	128470	5825.8	5912.4	5855.7	7498.5	9227.5	12687	14196	3661.9	4754.8	9494.6	3693.3
MWC10132694	Val Thr Tyr	Amino acid and Its metabolomics	Small Peptide	426.167	381.19	[M-H+2Na]+	C18H27N3O6	B	9285.6	24617	31851	26602	21620	24290	41342	51703	43118	48535	23181	59413	9	9	9	9	9	9	9	9	9	9	9	9	56865	72294	104080	132810	79097	74676	22720	34263	13354	28039	29636	24364	9	9	9	9	9
MWC10132719	Leu Asn His	Amino acid and Its metabolomics	Small Peptide	383.203	382.196	[M+H]+	C16H26N6O5	B	9	9	9	9	9	9	9	9	9	9	9	9	30130	67205	75889	61547	84545	108820	19227	28541	22004	41296	30436	86426	9	9	9	9	9	9	9	9	9	9	9	9	28454	21651	31396	31348	15833
MWC10132831	Tyr Gly Phe	Amino acid and Its metabolomics	Small Peptide	368.16	385.164	[M+H-H2O]+	C20H23N3O5	B	22785	106770	58189	61974	110210	77985	95787	100450	173980	129560	183260	173070	9	9	9	9	9	9	155670	109690	81677	72807	94163	75751	45156	12283	16403	13036	9	9	87620	31623	54521	44835	88466	9	138930	119540	118650	116350	75476
MWC10132957	Ile Glu Lys	Amino acid and Its metabolomics	Small Peptide	389.238	388.232	[M+H]+	C17H32N4O6	B	75623	77621	259240	141440	199430	139140	1078600	721780	755580	330060	709370	1370800	133230	115050	49736	87063	68330	215000	9	9	9	9	9	9	9	9	9	9	9	9	213010	201430	218160	206540	265960	198770	150510	170490	428670	139750	82490
MWC10133130	Leu Pro Tyr	Amino acid and Its metabolomics	Small Peptide	392.217	391.211	[M+H]+	C20H29N3O5	B	79298	122730	206610	253960	242810	169140	724710	887890	781810	359980	989650	743920	71772	183530	85833	135500	57942	170420	2510400	6464900	6247900	3384800	2034600	198760	82482	27394	109730	227420	61827	278470	2269700	1491800	1308200	1210700	1250700	977670	280970	300420	227460	234570	139890
MWC10133140	Phe Leu Leu	Amino acid and Its metabolomics	Small Peptide	392.254	391.247	[M+H]+	C21H33N3O4	B	237820	305070	1356400	1042600	906200	279540	134720	157480	102910	83996	147650	9	9	9	9	9	9	9	9	9	9	9	9	9	9	9	9	9	9	9	9	9	9	9	9	9	75450	60854	122670	63632	58593
MWC10133181	Leu Phe Asn	Amino acid and Its metabolomics	Small Peptide	393.211	392.206	[M+H]+	C19H28N4O5	B	468250	389570	322680	278040	383480	511310	1433600	894550	1117300	1335500	998430	645940	311970	261290	218370	177210	229290	198090	640780	503010	754590	390570	492510	300700	373630	548120	436040	454570	425550	485990	754140	872860	875420	780720	1067900	966420	420220	444450	399620	683510	443920
MWC10133233	Leu Phe Asp	Amino acid and Its metabolomics	Small Peptide	394.195	393.19	[M+H]+	C19H27N3O6	B	35858	9	125870	43593	49143	25296	945380	773720	455980	265060	291390	862590	9	10349	15394	8681.7	10404	8837.7	9	9	9	9	9	9	18643	9	9	13368	9	9	9	9	9	9	9	9	26012	36569	76410	18807	26557
MWC10133493	Glu Pro Arg	Amino acid and Its metabolomics	Small Peptide	401.209	400.207	[M+H]+	C16H28N6O6	B	379000	324100	223180	160310	390880	117530	6929100	5792200	6603800	6629100	3363300	3559800	37451	56346	27025	20172	44598	37786	393720	338350	247100	650850	376160	59193	156730	135450	231250	168670	182290	183620	139530	113490	207330	223570	220860	207780	16940	73434	28230	31987	26799
MWC10133498	Leu Leu Arg	Amino acid and Its metabolomics	Small Peptide	401.286	400.28	[M+H]+	C18H36N6O4	B	21823	9	63928	33842	30061	16585	287010	145490	135400	56446	143340	263090	9	9	9	9	9	9	9	9	9	9	9	9	9	9	9	9	9	9	9	9	9	9	9	9	1277800	1308400	785660	854580	760590
MWC10133563	Asp Ile Arg	Amino acid and Its metabolomics	Small Peptide	403.227	402.223	[M+H]+	C16H30N6O6	B	22484	30034	46804	35653	21528	34941	728640	463450	554830	266560	290100	663670	9	9	9	9	9	9	9	9	9	9	9	9	9	9	9	9	9	9	9	9	9	9	9	9	9	9	9	9	9
MWC10133745	Phe Leu Lys	Amino acid and Its metabolomics	Small Peptide	451.22	406.258	[M-H+2Na]+	C21H34N4O4	B	34693	35357	153070	18689	11796	32966	5824500	2537300	2315600	1394800	1394700	3011600	18861	43582	15674	13039	21938	30453	19403	26528	18857	25343	20866	45121	6407800	5497600	5844900	7805200	5754200	2930000	41649	2451600	39696	76892	163310	118490	30639	26771	30002	46191	13956
MWC10133834	Asn Ile Tyr	Amino acid and Its metabolomics	Small Peptide	409.212	408.201	[M+H]+	C19H28N4O6	B	1744900	4191800	1727100	2275200	1695100	1843000	19970	28091	99767	20496	53917	62076	108610	212030	81653	104690	130900	125180	1708700	1791200	1946400	1843000	1338100	243650	111380	179020	39150	50029	152050	21371	702220	824680	674730	587030	1391800	968190	5719100	3686400	2853300	3179700	3524700
MWC10134100	Glu Leu Arg	Amino acid and Its metabolomics	Small Peptide	417.246	416.238	[M+H]+	C17H32N6O6	B	28200	25474	9	18739	39903	27785	9	9	9	9	9	9	9	9	9	9	9	9	9	9	9	9	9	9	9	11788	9	24123	9	9	6835.4	32947	36009	18364	36528	13484	9	9	9	9	9
MWC10134225	Thr Trp Asp	Amino acid and Its metabolomics	Small Peptide	421.167	420.165	[M+H]+	C19H24N4O7	B	186430	136830	82084	120700	163390	171660	9	9	9	9	9	9	9	9	9	9	9	9	19581	22878	16576	19553	11835	12659	9	9	9	9	9	9	4809.3	27304	6944.9	4491.4	12646	13537	9	9	9	9	9
MWC10134309	Thr Phe Arg	Amino acid and Its metabolomics	Small Peptide	423.235	422.228	[M+H]+	C19H30N6O5	B	9	9	9	9	9	9	9	9	9	9	9	9	9	9	9	9	9	9	9	9	9	9	9	9	9	9	9	9	9	9	9	9	9	9	9	9	3195400	2622200	2912200	2304600	2698600
MWC10134712	Lys Tyr Gln	Amino acid and Its metabolomics	Small Peptide	484.241	437.227	[M+HCOO+2H]+	C20H31N5O6	B	9	9	9	9	9	9	9	9	9	9	9	9	9	9	9	9	9	9	9	9	9	9	9	9	9	9	9	9	9	9	9	9	9	9	9	9	769590	756780	513460	497210	490620
MWC10134790	Phe Phe Lys	Amino acid and Its metabolomics	Small Peptide	441.251	440.242	[M+H]+	C24H32N4O4	B	9	9	9	9	9	9	1926000	1073400	856290	625220	442900	1167600	9	9	9	9	9	9	9	9	9	9	9	9	153540	948060	334410	187720	580080	373610	9	9	9	9	9	9	9	9	9	9	9
MWC10135129	Trp Gln Lys	Amino acid and Its metabolomics	Small Peptide	461.25	460.243	[M+H]+	C22H32N6O5	B	304830	216340	181770	193640	169580	266660	9	9	9	9	9	9	22019	23666	22834	7745.3	9	31337	55311	17292	8128.8	9078	14646	24757	15134	25776	9852.1	15147	20860	7368	9	9	9	9	9	9	9	9	9	9	9
MWC10135287	Arg Phe Phe	Amino acid and Its metabolomics	Small Peptide	532.266	468.249	[M+CH3CN+Na]+	C24H32N6O4	B	30160	48997	32204	49067	58111	60249	9	9	9	9	9	9	20703	71817	164770	123670	105020	63962	58984	47037	43574	38055	9	72669	739430	1788900	1488900	1050400	1151400	1056400	9	9	9	9	9	9	9	9	9	9	9
MWC10152685	L- -Glutamyl-L-glutamic acid	Amino acid and Its metabolomics	Small Peptide	257.078	276.096	[M-H2O-H]-	C10H16N2O7	B	138190	95663	112410	122060	250410	107640	155820	109520	437260	118520	155540	206370	1103600	1655400	1846700	1626800	1680900	1532300	93812	83133	92169	67526	75937	1670600	41198	44616	32224	61949	69241	35865	676710	587930	612010	527910	591570	522750	114160	100830	145540	89748	130030
MWCL0000032	N-hexadecyl hydroxyproline	Amino acid and Its metabolomics	Amino acid derivatives	354.3	355.309	[M-H]-	C21H41NO3	B	9	9	9	9	9	9	2327.7	975.01	2463.9	5989.6	1294	2506.5	9	9	9	9	9	9	9	9	9	9	9	9	9	9	9	9	9	9	909.64	965.03	1554.4	744.04	550.68	513.43	9	9	9	9	9
MWC10013250	(1R)-Glutathionyl-(2R)-hydroxy-1,2-dihydronaphthalene	Amino acid and Its metabolomics	Amino acid derivatives	493.187	451.141	[M+CH3CN+H]+	C20H25N3O7S	B	34941	24519	20553	13522	28355	24729	9	9	9	9	9	9	22805	83644	35261	70729	74474	41165	9	9	9	9	9	97629	9	9	9	9	9	9	9	9	9	9	9	9	9	9	9	9	9
MWC10004174	3-Hydroxy-5-methyl-L-tyrosine	Amino acid and Its metabolomics	Amino acid derivatives	192.067	211.084	[M-H-H2O]-	C10H13NO4	A	10901	21901	7713.2	15036	11256	5290.4	25776	9500.2	22780	21811	34257	27257	18009	19025	19165	17489	22161	30153	27537	43919	40268	37207	42748	15987	9	9	9	9	9	9	8538.1	13582	16597	12785	17193	8765.3	259940	194990	168310	240050	308270
MWC10003978	3-Hydroxy-N6,N6,N6-trimethyl-L-lysine	Amino acid and Its metabolomics	Amino acid derivatives	290.123	205.155	[M+K+HCOOH]+	C9H21N2O3	A	14392	11552	18344	20474	15022	18268	338870	430640	191990	183320	243330	164730	32400	38769	47859	33128	33935	34723	24543	12901	8892	9	23325	33764	9	9	9	9	9	9	9	9	9	9	9	9	15423	19749	13071	19634	12436
MWC10005371	5-phosphonooxy-L-lysine	Amino acid and Its metabolomics	Amino acid derivatives	225.062	242.067	[M+H-H2O]+	C6H15N2O6P	B	6914300	5350600	4784200	4380200	5676300	6469700	10796000	10700000	10198000	11876000	10279000	11060000	10163000	9374300	10331000	9341000	9756200	8454200	13055000	12838000	12354000	11261000	12850000	9994100	9699300	11255000	9651800	10166000	8933300	9096700	9120400	8558700	8269600	8755000	8342200	9169900	11558000	11070000	11540000	11245000	11444000
MWC10128997	Arg Thr Phe	Amino acid and Its metabolomics	Small Peptide	423.24	422.228	[M+H]+	C19H30N6O5	B	9	9	9	9	9	9	567260	980370	332000	184920	296010	520180	9	79805	69209	96638	35903	345370	11422000	17005000	12812000	13818000	9214400	92723	93673	138590	124610	1585200	64886	1359600	9	9	9	9	9	9	9	9	9	9	9
MWC10137650	Gln-Ile	Amino acid and Its metabolomics	Small Peptide	260.16	259.153	[M+H]+	C11H21N3O4	A	271800	335870	1049700	604860	765150	360790	4261500	2554100	4061700	1630500	2053900	3845500	410680	1168500	1278200	715840	509210	2432700	312680	384460	331070	254090	282650	1197600	264030	194160	351340	553200	144630	462690	154900	209380	139850	157820	199770	136560	546450	564980	1080700	390740	280750
MWC10137657	Gln-Phe	Amino acid and Its metabolomics	Small Peptide	294.145	293.138	[M+H]+	C14H19N3O4	B	62775	77966	204800	121240	133640	67452	1232900	849160	915310	403420	720060	1027500	233400	338410	324980	321500	303890	477530	175420	218300	178710	182010	181440	400610	111920	59348	110820	118550	83583	89203	83034	110760	88638	58712	124260	118250	217240	210190	244920	187430	127850
MWC10128951	Glu Val Phe	Amino acid and Its metabolomics	Small Peptide	394.196	393.19	[M+H]+	C19H27N3O6	B	23310	60336	86682	63783	393940	60936	583110	400060	431080	331530	274730	493050	19789	118750	77146	48448	40126	82322	55951	67153	53281	51501	40397	130490	9	9	9	9	9	9	17065	23374	18490	10518	17467	26548	247610	255360	351310	181970	183510
MWC10137664	Glu-Phe	Amino acid and Its metabolomics	Small Peptide	295.129	294.122	[M+H]+	C14H18N2O5	A	1527500	2523400	1365800	2072300	6064900	2408100	4552700	2902600	11073000	2160500	3669600	3301700	963020	1540200	1245300	935010	1135900	1335000	757850	670140	717860	569360	501500	1660200	374910	418060	420620	507650	469160	343480	8884000	8829300	12486000	10146000	14099000	11797000	5080900	5991200	5333700	5172400	3625500
MWC10137661	Glu-Trp	Amino acid and Its metabolomics	Small Peptide	334.14	333.132	[M+H]+	C16H19N3O5	A	61725	115930	71121	64706	181760	70331	541610	417070	926460	282990	518940	597360	75453	75316	34473	53615	46465	105120	22269	24199	44365	26114	36495	106120	9	9	9	9	9	9	46394	47187	45689	38249	31596	40780	66748	114680	126990	60427	34549
MWC10146845	Glu-Val	Amino acid and Its metabolomics	Small Peptide	247.128	246.122	[M+H]+	C10H18N2O5	A	1500500	2877500	1608600	2019700	2098200	2114900	3087800	1887800	3601300	969410	1889300	1643300	469500	1043100	320030	647880	830580	516120	2000000	2839400	2085300	1984900	2293300	1105300	1820800	1660400	1462400	1236200	1906600	1500100	4778600	4417600	5318500	6232000	4090000	4139100	22346000	24249000	17929000	24324000	17920000
MWC10128893	Gly Phe Phe	Amino acid and Its metabolomics	Small Peptide	352.176	369.169	[M+H-H2O]+	C20H23N3O4	B	108690	587580	449700	283500	492500	109610	336240	286580	466110	307130	272530	431470	55380	135590	125370	177930	210190	137630	46835	64706	63102	50251	35730	46112	21569	26381	47753	44266	22504	22329	28639	37829	40255	33380	27849	33547	160860	178250	417100	138000	62496
MWC10128699	Gly Phe Ser	Amino acid and Its metabolomics	Small Peptide	310.138	309.132	[M+H]+	C14H19N3O5	B	229630	255150	216550	280060	364350	248210	1445500	2098800	538030	987810	1201600	1606400	456380	620460	475300	596430	745960	895860	324800	250130	211710	172860	188640	525280	156610	185970	140660	148830	209680	313240	6211900	4917000	5152100	4726700	6119600	4949300	506610	697020	707250	621620	576150
MWC10128662	Gly Pro Lys	Amino acid and Its metabolomics	Small Peptide	342.213	300.18	[M+CH3CN+H]+	C13H24N4O4	B	30518	189210	3068700	366040	446980	19232	9	9	9	9	9	9	9	9	9	9	9	9	9	9	9	9	9	9	9	9	9	9	9	9	9	9	9	9	9	9	9	9	9	9	9
MWC10150208	Gly-Tyr	Amino acid and Its metabolomics	Small Peptide	239.102	238.095	[M+H]+	C11H14N2O4	B	2884800	2178300	3008500	2464800	1912000	3081300	99005	46297	196480	68319	57507	111320	9	9	9	9	9	9	9	9	9	9	9	9	98303	120320	96459	76983	109120	108910	46485	29120	58093	42407	53696	43466	9	9	9	9	9
MWC10146799	His-Leu	Amino acid and Its metabolomics	Small Peptide	269.16	268.154	[M+H]+	C12H20N4O3	B	42598	83046	197620	69533	194110	92191	1636200	909190	1187700	586070	921240	1200300	91443	98042	46593	114810	104650	103760	65191	91694	65324	84315	58089	93544	381540	630610	681600	465080	561820	484680	56042	71906	76447	52659	62603	60455	119170	108050	155950	141730	82494
MWC10128134	Ile-Phe-OH	Amino acid and Its metabolomics	Small Peptide	773.303	386.148	[2M+H]+	C20H22N2O6	B	5396.4	20937	6947.7	12386	4299	9	34556	15469	61555	16388	27656	30353	1237200	4556000	3955000	3715300	4244600	3639400	401900	572150	349550	323770	457680	3022700	109230	347620	167630	179280	234910	147100	6462.1	9	3103.1	3696.9	1420.3	3351.2	2318300	963310	882320	2184600	2612200
MWC10009119	L-4-Hydroxyphenylglycyl-L-arginine;L-pHPg-L-Arg	Amino acid and Its metabolomics	Amino acid derivatives	370.174	323.159	[M+H+HCOOH]+	C14H21N5O4	A	55168	323970	165090	291740	255230	136010	184960	72476	101190	95242	159100	110940	9	9	9	9	9	9	9	9	9	9	9	9	43947	69235	46275	42313	105080	40885	9	9	9	9	9	9	9	9	9	9	9
MWC10128535	Leu Ile	Amino acid and Its metabolomics	Small Peptide	245.184	244.179	[M+H]+	C12H24N2O3	B	686750	556150	2288700	1665700	1747100	789520	11011000	4704600	8413600	3039500	4630700	7812600	617510	2233100	2152400	1338400	647430	3301900	351160	296280	266150	251390	232230	2287900	182240	259520	487850	794740	172710	366800	462390	484210	411780	398540	508340	361400	577630	793180	1428000	741830	447570
MWC10128715	Leu Leu Ala	Amino acid and Its metabolomics	Small Peptide	316.223	315.216	[M+H]+	C15H29N3O4	B	70142	88818	692830	138030	134740	137300	9	9	9	9	9	9	4341100	1966000	702140	890140	752430	797140	9	9	9	9	9	2073800	86234	63558	69099	80592	62497	47117	9	9	9	9	9	9	43474	16783	28097	14563	12182
MWC10128573	Lys Ile	Amino acid and Its metabolomics	Small Peptide	260.195	259.19	[M+H]+	C12H25N3O3	B	372840	434260	564480	631870	765970	553380	3638700	3286900	2983300	1698000	2507400	3977000	705900	1693000	1436200	1296000	701620	2142500	430540	592320	460150	407510	462060	1588300	306760	307770	472430	635260	316770	274820	394510	489110	355160	316610	459130	353130	590640	866780	1207800	823640	498840
MWC10127569	Met-Arg-Phe-Ala acetate salt	Amino acid and Its metabolomics	Small Peptide	522.245	523.258	[M-H]-	C23H37N7O5S	B	9	9	9	9	9	9	214770	107190	125600	150090	101110	345740	9	9	9	9	9	9	9	9	9	9	9	9	9	9	9	9	9	9	9	9	9	9	9	9	9	9	9	9	9
MWC10005141	N,N-Dihydroxy-L-tryptophan	Amino acid and Its metabolomics	Amino acid derivatives	257.043	236.08	[M-2H+Na]-	C11H12N2O4	B	9	9	9	9	9	9	9	9	9	9	9	9	9	9	9	9	9	9	9	9	9	9	9	9	9	9	9	9	9	9	97669	93873	106670	110120	114050	111270	9	9	9	9	9
MWC10004251	N,N-Dihydroxy-L-tyrosine	Amino acid and Its metabolomics	Amino acid derivatives	236.053	213.064	[M+Na]+	C9H11NO5	B	58545	45416	44515	44343	53331	56873	58280	70578	58650	52706	60591	42231	59471	55743	54382	70686	65191	63063	66990	66393	46646	53258	52840	57098	74583	78217	62216	69849	81779	87695	48149	70390	64759	55393	50726	61548	90273	80157	94047	90057	118270
MWC10006491	N-Acetyl-L-glutamyl 5-phosphate	Amino acid and Its metabolomics	Amino acid derivatives	305.97	269.03	[M-2H+K]-	C7H12NO8P	B	34032000	29885000	29080000	30731000	21395000	21825000	716840	201780	560880	272610	358600	217420	1255500	1707200	1541300	2013700	1151300	907210	43660000	50980000	57217000	52206000	50386000	1086500	27071000	617690	13107000	17523000	5695300	11260000	2949300	2575800	4106100	6603700	1758200	2362400	28276000	26232000	31719000	31714000	30771000
MWC10010906	N-Acetylmuramoyl-Ala	Amino acid and Its metabolomics	Amino acid derivatives	431.109	364.148	[M-2H+3Na]+	C14H24N2O9	B	616290	766270	399380	426460	658130	690780	9	9	9	9	9	9	9	9	9	9	9	9	9	9	9	9	9	9	9	9	9	9	9	9	9	9	9	9	9	9	9	9	9	9	9
MWC10128087	N-Oleoyl-L-Serine	Amino acid and Its metabolomics	Amino acid derivatives	370.295	369.288	[M+H]+	C21H39NO4	B	3844.2	6598	5238.7	4605.8	14791	21219	52905	32387	33923	19722	31200	30366	3139.7	17538	20832	15853	17517	15653	9	9	9	9	9	9	6771.4	24016	9022.8	9963.4	15470	21276	13295	15900	19009	14915	17903	7681	9	9	9	9	9
MWC10126844	N-Palmitoyl Glycine	Amino acid and Its metabolomics	Amino acid derivatives	334.238	313.262	[M+Na-2H]-	C18H35NO3	B	21615	31830	18365	18789	19461	29892	1797400	2554100	1995000	974240	2022600	1746300	124540	87320	30611	52936	130090	80539	9	9	9	9	9	116590	79405	41358	36906	67986	50262	48010	1181900	211460	638550	341150	336470	239020	12930	13648	23029	8623.9	10252
MWC10005585	N-Succinyl-L-glutamate;(2S)-2-(3-Carboxypropanoylamino)pentanedioic acid	Amino acid and Its metabolomics	Amino acid derivatives	287.087	247.069	[M-H+CH3CN]-	C9H13NO7	B	9	9	9	9	9	9	9	55345	9	128720	9	122140	9	9	9	9	9	9	9	9	9	9	9	9	3533100	5443900	1415100	720120	9897800	1847500	18962000	17924000	17583000	14760000	15267000	19039000	348460	278270	166890	198400	328250
MWC10126411	O-BENZYL-l-SERINE	Amino acid and Its metabolomics	Amino acid derivatives	194.082	195.09	[M-H]-	C10H13NO3	B	204900	2375200	418460	367800	331890	61679	5621.8	2290.8	2501.7	3757.7	4790	10429	17514	42946	5006.7	17097	8131.8	12832	1421000	1146300	1313700	1093600	1352200	22522	65854	8127.8	26171	69057	20832	25877	15431	14185	13742	16224	20845	15800	3901500	1450900	1821500	2512300	5307300
MWC10127904	Phe Lys	Amino acid and Its metabolomics	Small Peptide	338.147	293.174	[M-H+2Na]+	C15H23N3O3	B	19825	62253	128170	59413	112320	73745	1086500	751420	909890	576370	942560	1575100	65060	108580	110760	84124	62008	234340	51073	54516	45294	50796	46992	148690	73442	50558	93278	133360	59845	58574	154450	164100	188840	161120	257060	179430	129150	189340	250230	130140	87525
MWC10128562	Phe Ser	Amino acid and Its metabolomics	Small Peptide	253.119	252.111	[M+H]+	C12H16N2O4	B	335380	372450	1363100	1024500	842740	419340	7078000	4603300	6135600	2891100	4170500	6142700	183950	299230	305860	300510	233090	721900	153560	206960	162820	144740	115780	312040	343430	451460	1172500	1054600	338840	379780	484120	713730	471250	423120	536570	465110	560530	692120	812390	500000	450300
MWC10128502	Pro Leu	Amino acid and Its metabolomics	Small Peptide	229.154	228.147	[M+H]+	C11H20N2O3	B	594590	1474600	2287300	1261800	1722600	880360	3589100	2549600	16554000	2385300	3614300	4411100	456200	962040	342040	358190	337520	503680	295210	326150	372450	268560	340990	901070	2168800	952800	1799000	3280600	1020600	3013000	459630	574560	363200	358080	487450	388380	1173400	1492100	1529600	1504000	977820
MWC10128624	Pro Leu Gly	Amino acid and Its metabolomics	Small Peptide	286.176	285.169	[M+H]+	C13H23N3O4	B	168070	217360	300840	276330	234270	185690	1411500	1338200	2164000	793920	1423300	1511000	76563	152560	146570	173610	75377	381610	64181	55602	56208	38952	57672	163990	296940	147730	376710	642280	145900	137170	1044000	1604200	1123700	1196300	1618900	1286800	63479	108590	211700	94902	31202
MWC10128635	Ser Trp	Amino acid and Its metabolomics	Small Peptide	292.129	291.122	[M+H]+	C14H17N3O4	B	108580	379670	343770	307610	592580	182830	1955000	1592700	2436600	1033700	1818200	2264900	93564	225080	344320	160750	135670	520920	69733	53635	59996	56878	64985	266110	118620	58776	174230	263020	80715	39540	109610	138140	140720	137940	156560	85204	194580	287180	348850	204270	123470
MWC10003147	Serine O-sulfate	Amino acid and Its metabolomics	Amino acid derivatives	236.993	184.999	[M+Cl+NH3]-	C3H7NO6S	A	562940	584730	591940	598230	595880	559910	381790	398790	392680	377580	377670	372960	381540	364840	367650	363640	360310	383770	353260	344250	329350	342350	343150	396050	436960	350580	405850	401730	424350	425870	367300	352130	359990	372730	379350	358100	328870	325190	348520	339700	363490
MWC10128512	Thr Leu	Amino acid and Its metabolomics	Small Peptide	233.148	232.142	[M+H]+	C10H20N2O4	A	197620	163240	576450	361680	600950	265960	9680800	5245500	6770000	3900000	3290400	8468100	332900	662390	457510	492230	335850	852570	110830	155560	152990	108290	128240	725760	299230	229440	432590	534650	184250	290240	212860	197900	149850	141090	162500	118190	219330	296090	649460	221360	300100
MWC10128720	Trp Leu	Amino acid and Its metabolomics	Small Peptide	318.181	317.174	[M+H]+	C17H23N3O3	B	136650	134980	214830	268540	184120	176200	699030	1130500	578670	313970	589540	1001700	49189	81082	53145	71231	37522	157140	86814	99522	57773	45415	46730	88800	97813	70224	85074	84211	43872	36544	43530	69025	55356	63874	53156	68350	132440	105550	173290	131820	72638
MWC10128763	Trp Lys	Amino acid and Its metabolomics	Small Peptide	333.189	332.185	[M+H]+	C17H24N4O3	A	9	9	9	9	9	9	9	9	9	9	9	9	1834600	2820800	2781200	3493200	3689100	2669800	9	9	11472	11863	11313	3158100	9	9	9	9	9	9	9	9	9	9	9	9	9	9	9	9	9
MWC10150205	Tyr Arg	Amino acid and Its metabolomics	Small Peptide	374.124	337.175	[M-2H+K]-	C15H23N5O4	A	59840	99632	103070	164240	123500	77093	553100	427940	405040	277650	375090	847830	21191	57812	23956	44814	15450	34363	36372	59180	52109	55363	40025	88015	20058	6135	31079	25240	18193	17288	16195	18482	53928	35706	20468	34178	92197	120490	165560	131510	59216
MWC10128702	Tyr Glu	Amino acid and Its metabolomics	Small Peptide	311.124	310.116	[M+H]+	C14H18N2O6	B	1571400	3136900	1291800	2203700	3061600	2255000	1729700	1147400	2597000	877350	1095800	1214700	167760	251600	186180	166690	205560	234400	1222100	1142500	1120900	943290	845110	360930	311460	498700	478550	537730	541530	287120	5440900	4073500	4868700	4968200	7016300	7224000	8844200	7987200	7367300	8189000	4634600
MWC10128648	Tyr Ile	Amino acid and Its metabolomics	Small Peptide	295.165	294.158	[M+H]+	C15H22N2O4	B	944790	3346700	4209300	3142200	3734300	1409900	9496400	6370600	6816700	4194200	4921400	8157200	1192900	1070800	711040	867590	750570	1825500	696020	699610	648640	544480	543040	1052000	479620	613300	848850	887700	443430	767270	477610	594100	400890	343640	380770	344880	1224400	1460600	2356000	1116600	933690
MWC10128646	Tyr Leu	Amino acid and Its metabolomics	Small Peptide	295.166	294.158	[M+H]+	C15H22N2O4	B	856670	3468200	4294400	2940200	3543100	1360900	9374300	6150200	6791000	4261600	4637500	8186300	1265700	1096300	656290	904190	646750	1762700	698570	660140	621210	551970	505520	1074200	462930	676580	891130	995510	452210	625680	428860	590660	427270	296000	386470	334890	1259000	1506300	2361400	1059600	947250
MWC10129002	Tyr Pro Phe	Amino acid and Its metabolomics	Small Peptide	426.201	425.195	[M+H]+	C23H27N3O5	B	9	9	9	9	9	9	292710	193870	359230	166750	445370	464620	9	9	9	9	9	9	3218700	5201800	6180900	4679200	2560100	9	9	9	9	9	9	9	9	9	9	9	9	9	9	9	9	9	9
MWC10128616	Tyr Val	Amino acid and Its metabolomics	Small Peptide	281.151	280.142	[M+H]+	C14H20N2O4	B	261280	670640	1338100	851270	1300900	475450	3113700	2917000	1886000	1266200	2533200	3007500	9	9	9	9	9	9	9	9	9	9	9	9	148620	254650	282980	195720	146900	97525	651870	554410	232830	222750	269920	320960	523260	527960	582520	577170	398250
MWC10128565	Val His	Amino acid and Its metabolomics	Small Peptide	255.144	254.138	[M+H]+	C11H18N4O3	B	19302	254360	793090	176890	388730	25362	879230	599200	137460	309490	227680	531210	11826	17327	67850	68054	80146	81517	9	9	9	9	9	9	22047	70333	59379	22239	59208	44843	9	9	9	9	9	9	29766	19109	40825	42757	54105
MWC10006362	gamma-Glutamyltyramine;gamma-L-Glutamyltyramine	Amino acid and Its metabolomics	Small Peptide	265.12	266.127	[M-H]-	C13H18N2O4	A	9	9	9	9	9	9	9	9	9	9	9	9	9	9	9	9	9	9	9	9	9	9	9	9	9	9	9	9	9	9	9	9	9	9	9	9	9	9	9	9	9
MWC10009047	gamma-L-Glutamyl-L-cysteinyl-beta-alanine	Amino acid and Its metabolomics	Small Peptide	342.074	321.099	[M-2H+Na]-	C11H19N3O6S	B	9	9	9	9	9	9	515660	403320	192320	167550	191180	410560	9	9	9	9	9	9	9	9	9	9	9	9	104430	184290	364560	131390	347920	185740	9	9	9	9	9	9	9	9	9	9	9
MWC10013421	gamma-L-Glutamyl-S-(hercyn-2-yl)-L-cysteine S-oxide	Amino acid and Its metabolomics	Small Peptide	499.112	462.166	[M-2H+K]-	C17H28N5O8S	A	906450	5866300	1362100	1207200	1763900	2269800	242200	167750	153640	157440	189110	233970	700110	1154100	464900	696730	417580	440440	317500	305530	452040	202340	283710	897020	664020	95909	140740	768280	101440	138310	306130	480710	426520	409390	690290	549570	1248800	1449700	406470	684270	1440100
MWC10012954	Glutathionylspermidine;N1-(gamma-L-Glutamyl-L-cysteinyl-glycyl)-spermidine	Amino acid and Its metabolomics	Amino acid derivatives	435.239	434.231	[M+H]+	C17H34N6O5S	B	9	9	9	9	9	9	493320	360350	405110	219860	215030	625600	9	9	9	9	9	9	9	9	9	9	9	9	9	9	9	9	9	9	9	9	9	9	9	9	9	9	9	9	9
MWC10013845	Glutathionylspermine	Amino acid and Its metabolomics	Amino acid derivatives	472.268	491.289	[M-H-H2O]-	C20H41N7O5S	A	60342	19718	38926	47496	52587	64749	126900	40043	69160	47183	48680	119310	9	9	9	9	9	9	9	9	9	9	9	9	9	9	9	9	9	9	9	9	9	9	9	9	9	9	9	9	9
MWC10139251	N4-(Acetyl-beta-D-glucosaminyl)asparagine;N4-(beta-N-Acetyl-D-glucosaminyl)-L-asparagine;1-beta-Aspartyl-N-acetyl-D-glucosaminylamine	Amino acid and Its metabolomics	Amino acid derivatives	356.104	335.133	[M-2H+Na]-	C12H21N3O8	B	121820	318790	122740	96343	216730	185230	46742	82969	57336	73456	63966	72528	75721	70096	48382	48145	96494	57577	1029500	1101000	813600	709080	904040	73160	51519	37081	50779	49714	36972	29501	8689.1	11943	10898	11515	9034.3	5413.9	390280	226180	221910	238810	173940
MWC10000640	trans-1,2-Dihydrobenzene-1,2-diol	Amino acid and Its metabolomics	Amino acid derivatives	154.085	112.052	[M+CH3CN+H]+	C6H8O2	B	1339000	1416100	1386100	1324800	1346600	1431600	1412200	1416100	1361800	1404700	1392600	1329500	1662300	1600800	1730300	1737700	1741800	1659300	1493800	1550000	1532500	1670100	1642500	1525400	1431500	1574300	1593700	1668400	1564500	1490800	1355200	1417400	1373200	1400900	1327000	1334600	1690900	1610800	1651500	1665400	1717700
MEDN0085	Benzoylformic Acid	Benzene and substituted derivatives	Phenolic acids	149.024	150.032	[M-H]-	C8H6O3	A	9	9	9	9	9	9	49886	48493	52307	59706	58856	81682	9	9	9	9	9	9	185390	239940	216770	171100	201730	9	9	9	9	9	9	9	9	9	9	9	9	9	121050	116650	150680	221660	168450
MEDN0086	Terephthalic Acid	Benzene and substituted derivatives	Phenolic acids	165.019	166.027	[M-H]-	C8H6O4	A	231180	295420	139800	198580	222020	140000	102800	164640	117060	86433	203710	216420	282850	294050	132480	183210	280110	384350	218570	175240	164340	122170	185970	244110	102160	155850	109100	132570	156250	161640	320950	224310	1196400	221670	199630	175550	91828	102620	129740	207400	382880
MEDN0089	2,5-Dihydroxy Benzoic Acid	Benzene and substituted derivatives	Phenolic acids	153.019	154.027	[M-H]-	C7H6O4	A	149600	275700	169210	114210	158100	144830	2406300	1664200	3181300	2115200	2476600	3213500	2544500	1673900	3325300	2535000	5160900	3890300	145920	196970	186310	143310	193220	1983600	3714100	3921200	5046900	3619600	4930800	4184300	773980	621670	575420	598790	736540	660330	591530	415310	549710	621040	693020
MEDN0092	3,4-Dihydroxybenzeneacetic Acid	Benzene and substituted derivatives	Phenolic acids	167.1	168.042	[M-H]-	C8H8O4	B	4213100	4045500	2445200	2311600	4203800	2901500	35743000	20471000	33996000	34657000	39815000	40531000	238330	281090	360630	255020	290140	434230	431460	473870	503930	411530	534660	393360	1018200	1824300	1179100	1181300	922450	926160	954070	1114500	961250	958570	1207400	1087600	1569500	1027300	1288700	1577100	1636200
MEDN0093	3-Hydroxyanthranilic Acid	Benzene and substituted derivatives	Phenolic acids	152.035	153.043	[M-H]-	C7H7NO3	B	9	9	9	9	9	9	48594	42006	35907	10639	17484	42369	9	9	9	9	9	9	9	9	9	9	9	9	9	9	9	9	9	9	9	9	9	9	9	9	9	9	9	9	9
MEDN0117	4-Methylcatechol	Benzene and substituted derivatives	Phenolics	123.045	124.052	[M-H]-	C7H8O2	A	9	9	9	9	9	9	9	9	9	9	9	9	9	9	9	9	9	9	174630	240780	213790	327030	207600	9	9	9	9	9	9	9	9	9	9	9	9	9	9	9	9	9	9
MEDN0128	4-Hydroxy-3-methoxybenzaldehyde	Benzene and substituted derivatives	Phenolics	151.04	152.047	[M-H]-	C8H8O3	A	349160	354480	253720	298620	330050	406090	355440	183370	365120	654440	302630	257610	415220	375910	273040	299230	284470	267800	540210	444760	543940	555350	579440	399550	561550	798170	624000	685510	380100	473890	352470	236630	243640	254950	281780	306050	468220	317640	306760	417780	326440
MEDN0410	4-Hydroxybenzaldehyde	Benzene and substituted derivatives	Benzene and substituted derivatives	121.029	122.037	[M-H]-	C7H6O2	A	464280	451720	309940	316440	459650	586810	1038700	894590	973560	1372500	1187400	1072600	648150	499570	484180	477940	468340	473650	747790	814850	859690	832010	871400	647460	782400	1601000	1000400	1018800	857010	897640	878310	482240	651040	508390	475700	534420	705030	567010	540250	776400	716020
MEDN0415	2-(Formylamino)Benzoic Acid	Benzene and substituted derivatives	Phenolic acids	164.035	165.043	[M-H]-	C8H7NO3	A	25253	36576	9	23562	41543	29921	46406	57535	135880	103730	52885	52810	18744	56337	23866	33863	36803	40893	9	9	28559	51490	44248	62927	33208	46469	75366	28727	23071	6136.1	60839	9	55747	70372	77525	63358	25955	47844	24810	9	28049
MEDN0481	2,4-Dihydroxy Benzoic Acid	Benzene and substituted derivatives	Phenolic acids	153.019	154.027	[M-H]-	C7H6O4	A	149600	275700	169210	114210	158100	144830	2406300	1664200	3181300	2115200	2476600	3213500	2544500	1673900	3325300	2535000	5160900	3890300	145920	196970	186310	143310	193220	1983600	3714100	3921200	5046900	3619600	4930800	4184300	773980	621670	575420	598790	736540	660330	591530	415310	549710	621040	693020
MEDN0541	DL-3,4-Dihydroxyphenyl glycol	Benzene and substituted derivatives	Benzene and substituted derivatives	169.05	170.058	[M-H]-	C8H10O4	A	151020	65297	48312	96865	83926	108830	80290	70026	76714	52256	78582	95463	28526	27402	36066	34590	41299	42805	69080	87676	67982	111050	102870	34378	55485	57733	49012	56696	43321	58823	61056	70984	72890	32992	63314	32138	64481	94671	71890	55840	86163
MEDN0554	2-(4-Hydroxyphenyl)ethanol	Benzene and substituted derivatives	Benzene and substituted derivatives	137.06	138.068	[M-H]-	C8H10O2	A	1242500	1008500	796850	1976400	1722700	1206500	1232900	1100100	2147200	1375500	1693100	1433200	1293700	1297200	1214900	1861400	1557400	1896500	3128000	4057700	3072300	3765100	3036400	1290100	3287900	3475900	3237400	3267800	3025300	2621300	13647000	7527300	25050000	17612000	24085000	14036000	833550	988800	1047900	782710	929980
MEDN0576	1,2,3-Trihydroxybenzene	Benzene and substituted derivatives	Phenolics	125.024	126.032	[M-H]-	C6H6O3	A	9	9	9	9	9	9	112870	83188	122880	108020	101520	67374	9	9	9	9	9	9	9	9	9	9	9	9	222.49	9	9	9	9	9	9	9	9	9	9	9	77479	42675	77407	78041	85222
MEDN0594	(E)-3-(3-hydroxyphenyl)prop-2-enoic acid	Benzene and substituted derivatives	Phenolic acids	163.04	164.047	[M-H]-	C9H8O3	A	39656	66940	38352	81100	155280	75786	44441	28250	184640	79905	35095	69183	39168	102680	189470	73258	128960	227660	9	22537	9	9	9	133220	101210	54867	613630	289200	24260	57062	195410	141490	305400	468600	443590	265230	35176	39204	49066	19573	24649
MEDN0620	Glucotropaeolin	Benzene and substituted derivatives	Benzene and substituted derivatives	408.042	409.05	[M-H]-	C14H19NO9S2	A	9	9	9	9	9	9	34877	16223	18747	15104	23522	23795	9	9	9	9	9	9	9	9	9	9	9	9	9	9	9	9	9	9	9	9	9	9	9	9	9	9	9	9	9
MEDN0648	2,5-Dihydroxybenzaldehyde	Benzene and substituted derivatives	Benzene and substituted derivatives	137.024	138.032	[M-H]-	C7H6O3	B	472050	366550	9	499060	430310	548390	9	9	9	9	9	9	9	9	9	9	9	9	9	9	9	9	9	9	9	9	9	9	9	9	9	9	9	9	9	9	714100	750240	729680	909840	658680
MEDN0661	2-hydroxy-2-(4-hydroxy-3-methoxyphenyl)acetic acid	Benzene and substituted derivatives	Phenolic acids	197.045	198.053	[M-H]-	C9H10O5	A	12734	12838	11393	8700.7	11359	13519	11693	9199.7	6556.9	12810	11644	9953.6	15020	9745.3	9146.9	10092	8262.1	8943.8	11502	8930	12264	10974	10428	15833	10835	19757	13624	18546	13406	13843	11521	14119	15981	13003	12905	10681	10254	13408	11984	7381	9894.4
MEDN0729	Phenoxyacetic acid	Benzene and substituted derivatives	Phenolic acids	151.04	152.047	[M-H]-	C8H8O3	A	19447	16111	15787	11710	11419	10033	9	9	9	9	9	9	9	9	9	9	9	9	32378	32567	28093	34746	31440	10300	9	9	9	9	9	9	6067.2	13096	12396	10894	11038	11073	9	9	9	9	9
MEDN0739	4-Hydroxybenzyl alcohol	Benzene and substituted derivatives	Benzene and substituted derivatives	123.045	124.052	[M-H]-	C7H8O2	A	9	9	9	9	9	9	37528	51956	107740	72607	44656	90424	13125	17579	6960.7	5590.6	4426.5	5169.6	221300	341800	287090	186820	277060	14168	92422	79203	58877	57904	55189	62809	23834	9707.1	14557	14717	19904	13424	184350	103800	132460	218180	180700
MEDN0745	Propylparaben	Benzene and substituted derivatives	Phenolic acids	179.071	180.079	[M-H]-	C10H12O3	A	79845	92152	66027	46056	85010	67592	45410	34331	35370	110800	44786	36484	86358	88140	64051	48335	73241	73830	57505	47905	73932	56069	57939	97546	103050	193820	132170	160480	107700	96958	70586	73134	36244	38982	44227	58062	75653	57026	62912	66112	69468
MEDN0748	Methylparaben	Benzene and substituted derivatives	Phenolic acids	151.04	152.047	[M-H]-	C8H8O3	A	317230	301670	286670	212860	306230	448650	257520	238230	275860	721130	286930	262000	568170	524630	419670	613300	424460	500250	332690	310590	363750	287110	296290	550250	943240	1709700	870900	1174500	825020	870370	8710700	10518000	19143000	13599000	13604000	13753000	384500	305580	300860	376920	338860
MEDN0848	Indole-3-Ethanol	Benzene and substituted derivatives	Benzene and substituted derivatives	160.076	161.084	[M-H]-	C10H11NO	A	9	9	9	9	9	9	9	9	9	9	9	9	9	9	9	9	9	9	9	9	9	9	9	9	9	9	9	9	9	9	25270	6031.3	52040	21677	27081	27980	9	9	9	9	9
MEDN0852	3-Amino-4-Hydroxybenzoic Acid	Benzene and substituted derivatives	Phenolic acids	152.035	153.043	[M-H]-	C7H7NO3	A	7006.5	13547	12769	11242	15151	12434	84652	68423	139500	87099	101140	137970	102720	64381	132440	111310	186920	120440	43138	77241	56849	50510	86580	89858	144900	209450	217260	201860	271450	189910	55087	44301	31972	40399	37496	44336	37949	25991	56691	47123	58911
MEDN0856	2',4'-Dihydroxyacetophenone	Benzene and substituted derivatives	Benzene and substituted derivatives	151.04	152.047	[M-H]-	C8H8O3	A	317230	301670	286670	212860	306230	448650	257520	238230	275860	721130	286930	262000	568170	524630	419670	613300	424460	500250	332690	310590	363750	287110	296290	550250	943240	1709700	870900	1174500	825020	870370	8710700	10518000	19143000	13599000	13604000	13753000	384500	305580	300860	376920	338860
MEDN1037	p-Cresol	Benzene and substituted derivatives	Phenolics	107.05	108.058	[M-H]-	C7H8O	B	71250	52680	31319	64903	72871	73592	85437	112310	63652	87830	94017	65439	284480	121870	98580	58226	184840	180770	78842	60370	82068	38526	60813	109440	63538	58935	34198	74914	64608	23772	97299	116890	141880	95430	132610	144270	89722	57576	51811	37095	44726
MEDN1092	4-acetoxyphenol	Benzene and substituted derivatives	Phenolics	151.026	152.047	[M-H]-	C8H8O3	A	319050	727400	646040	488690	703830	296470	6237900	6639600	6567200	8438500	3440000	7346000	136520	288870	180620	126120	124320	218920	15538	8666.4	9	15479	9	174200	148090	111060	176660	118130	155540	168550	56931	73002	47563	53419	78576	61413	263560	260370	378300	294290	269370
MEDN1101	Ethyl 3,4-dihydroxybenzoate(benzoic acid)	Benzene and substituted derivatives	Benzene and substituted derivatives	181.05	182.058	[M-H]-	C9H10O4	A	9	9	9	9	9	9	9	9	9	9	9	9	9	9	9	9	9	9	9	9	9	9	9	9	93962	122350	121920	108160	149810	104850	9	9	9	9	9	9	9	9	9	9	9
MEDN1167	4-Hydroxybenzoic Acid	Benzene and substituted derivatives	Phenolic acids	137.024	138.032	[M-H]-	C7H6O3	A	1243800	965810	773200	1930800	1616500	1225500	1242700	1113700	2045600	1386900	1707700	1366000	1234800	1355700	1304500	1962900	1679300	1910000	3150700	4131900	3396500	4023000	3090800	1124600	3232500	3748300	3359100	3258400	3060700	2753200	13484000	7323000	25347000	17562000	25060000	13619000	818610	1026300	1049200	802540	967400
MEDN1183	Multifidol	Benzene and substituted derivatives	Phenolics	209.081	210.089	[M-H]-	C11H14O4	B	81881	41657	12207	48707	37516	51501	34475	19717	29968	21803	25849	24011	15145	13292	14097	15495	10514	12404	42524	38219	29836	51977	44109	11656	30330	29314	18886	18987	12732	26167	29406	31982	24230	19558	27846	17610	28262	43745	30342	28011	43818
MEDN1191	1,2-epoxy-3-(p-nitrophenoxy) propane	Benzene and substituted derivatives	Benzene and substituted derivatives	194.045	195.053	[M-H]-	C9H9NO4	B	43717	21999	6182.3	58689	25935	18628	9	9	9	9	9	9	25575	15311	10913	9	22804	24544	128560000	69397000	84054000	77619000	81127000	14829	9	9	9	9	9	9	9	9	9	9	51588	9	14946	14471	35192	16349	18699
MEDN1192	2-acetylresorcinol	Benzene and substituted derivatives	Phenolics	167.034	168.042	[M-H]-	C8H8O4	B	11327	13143	9607	16828	12324	12655	1325000	1173100	1463700	1579000	1306600	1597600	1672900	2198600	2272100	2690300	2515100	2061800	40363	48310	62595	51688	61654	2970100	640720	921860	750620	600680	787970	850790	106430	100940	111680	96231	90389	115920	256510	237750	253990	322610	346960
MEDN1193	Acetaminophen	Benzene and substituted derivatives	Phenolics	150.056	151.063	[M-H]-	C8H9NO2	B	25942	14975	4310.3	31523	16598	9725.9	9	9	9	9	9	9	12412	3833.7	8199.8	10428	18991	8257.5	75226000	42035000	47904000	44705000	47663000	5264.2	9	9	9	9	9	9	9	9	9	9	28385	9	6327.9	8459.2	16241	16040	11745
MEDN1213	2-(4-hydroxyphenyl) propionate	Benzene and substituted derivatives	Phenolic acids	165.06	166.063	[M-H]-	C9H10O3	A	12291	11845	9451.6	5846.2	15852	14902	109140	100120	193200	103460	128850	87577	135130	15518	19155	10778	38148	73999	331730	178050	203820	129970	267890	12524	12972	26507	24287	7397.2	2845.3	12808	44997	267010	57307	13850	14697	3999.3	7252.2	8282	7763.8	7842.9	8132.3
MEDN1231	1-O-vanillyl-β-D-glucose	Benzene and substituted derivatives	Benzene and substituted derivatives	329.088	330.095	[M-H]-	C14H18O9	A	45103	30672	21170	38389	46928	47860	52614	24066	29706	34537	17075	22174	164270	138560	156040	311820	396440	428950	2761800	3088300	3025100	3768800	3956900	164490	54860	48649	52769	50697	53405	53485	46649	53257	45333	52387	46029	56727	27085	31718	35515	24894	33305
MEDN1233	P-hydroxyphenylacetylglycine	Benzene and substituted derivatives	Phenolic acids	208.061	209.069	[M-H]-	C10H11NO4	B	408610	2684700	1213400	757350	827110	374350	570520	368360	698210	530110	623550	872640	750760	725250	1094000	915150	1443200	1289100	195300	233080	263690	216940	222820	862340	619600	779860	515870	665080	498330	534180	1585800	1494500	1366900	1554300	1835500	1632900	1233400	1018200	982570	1204000	1481600
MEDN1338	2-Hydroxy HippuricAcid	Benzene and substituted derivatives	Phenolic acids	194	195.053	[M-H]-	C9H9NO4	A	39997	24838	6580.5	57101	20665	17582	9	9	9	9	5597.7	4679.8	17577	8259.3	12902	14448	23798	22140	119670000	68476000	80274000	74869000	78406000	9	9	9	9	9	9	9	9	9	9	9	50093	9	16710	17700	23000	18400	22293
MEDP0085	Tyramine	Benzene and substituted derivatives	Benzene and substituted derivatives	138.084	137.084	[M+H]+	C8H11NO	A	77798	164940	20336	90552	147570	92269	677070	229500	4343300	1481300	2495000	719940	197740	1295700	241490	178170	104930	505000	5046.5	18212	9572.4	27435	33257	1190400	2013.2	5182.2	8778.4	8638.7	15991	4797.1	19049	11866	26209	22669	13470	14420	13743	8736	16953	3870	14174
MEDP0101	P-Coumaric Acid	Benzene and substituted derivatives	Phenolic acids	165.047	164.047	[M+H]+	C9H8O3	A	22359000	23393000	13360000	22607000	21021000	27296000	5858600	7832200	6962800	4811600	4900600	5858200	11982000	20712000	10446000	13842000	13056000	13465000	25631000	25238000	25771000	30835000	28734000	15742000	15095000	13837000	8420300	10050000	12432000	12430000	3611400	1956800	2474200	1608700	2698600	2377500	36719000	39654000	31972000	42680000	46612000
MEDP0114	Phthalic Acid	Benzene and substituted derivatives	Phenolic acids	167.027	166.027	[M+H]+	C8H6O4	A	9	9	9	9	9	9	9	9	9	9	9	9	2348700	2323900	699330	1248700	2560200	4934900	67327	47048	55720	39506	53437	2442800	9	9	9	9	9	9	620270	250380	601980	303380	416440	460820	9	9	9	9	9
MEDP0137	Protocatechuic Aldehyde	Benzene and substituted derivatives	Phenolics	139.1	138.032	[M+H]+	C7H6O3	A	9	9	9	9	9	9	1144300	698920	1071700	1115100	1026300	1106300	1406300	1845700	1842300	1359800	1759800	1557000	219020	304070	370780	279480	292640	1840600	236250	594680	339070	430410	355960	427970	39149	42213	66968	39526	69122	21729	627370	490320	494350	625340	1133700
MEDP0507	2-Hydroxycinnamic acid	Benzene and substituted derivatives	Phenolic acids	165.047	164.047	[M+H]+	C9H8O3	B	22359000	23393000	13360000	22607000	21021000	27296000	5858600	7832200	6962800	4811600	4900600	5858200	11982000	20712000	10446000	13842000	13056000	13465000	25631000	25238000	25771000	30835000	28734000	15742000	15095000	13837000	8420300	10050000	12432000	12430000	3611400	1956800	2474200	1608700	2698600	2377500	36719000	39654000	31972000	42680000	46612000
MEDP0598	2'-Hydroxy-5'-methylacetophenone	Benzene and substituted derivatives	Benzene and substituted derivatives	151.068	150.068	[M+H]+	C9H10O2	B	2225400	2163700	1627000	1294100	2445200	3574900	246880	261330	172930	302700	208540	180130	1111600	1048300	1714500	1063500	1051200	1060700	579160	595400	636910	709760	491720	1257200	506510	534140	441040	543260	430950	458120	283910	325840	356130	344610	335680	339530	402650	361230	356670	353670	317250
MEDP0647	Anisic acid	Benzene and substituted derivatives	Phenolic acids	153.3	152.047	[M+H]+	C8H8O3	A	9	9	9	9	9	9	9	9	9	9	9	9	9	9	9	9	9	9	9	9	9	9	9	9	9	9	9	9	9	9	9	9	9	9	9	9	9	9	9	9	9
MEDP0654	2-Phenylacetamide	Benzene and substituted derivatives	Benzene and substituted derivatives	136	135.068	[M+H]+	C8H9NO	A	9	9	9	9	9	9	18962000	13742000	14494000	13319000	12549000	14367000	65249	110690	205170	88007	79109	108310	70261	56089	76874	65989	101120	83187	105830	193370	142460	194530	130580	132530	90141	150640	89206	88357	80957	74621	87360	90819	117150	79839	128890
MEDP0734	2-Aminophenol	Benzene and substituted derivatives	Phenolics	110.2	109.053	[M+H]+	C6H7NO	A	48167	73269	18654	31735	62752	30296	136130	131500	124780	113750	137100	111920	458370	336530	334690	404050	611460	499670	91567	77401	57386	73752	28902	397280	35966	53331	28537	21262	18869	23761	343730	507440	517440	246390	422970	443840	83002	183760	239890	142970	39838
MEDP0736	1,3-Diisopropylbenzene	Benzene and substituted derivatives	Benzene and substituted derivatives	163.2	162.141	[M+H]+	C12H18	A	145920	150030	144380	146160	176060	143880	168340	148510	191740	163490	144690	162110	182830	167360	210500	133310	195830	192950	148110	169160	148730	149910	210770	163800	160640	204950	150200	201410	178430	192330	286800	261830	253220	315230	311060	304660	174830	213610	181100	203680	190710
MEDP0745	Creosol	Benzene and substituted derivatives	Phenolics	139.2	138.068	[M+H]+	C8H10O2	B	9	9	9	9	9	9	9	9	9	9	9	9	9	9	9	9	9	9	9	9	9	9	9	9	9	9	9	9	9	9	4558800	5682400	4272500	4190800	8601400	7789800	9	9	9	9	9
MEDP0788	Diphenylamine	Benzene and substituted derivatives	Benzene and substituted derivatives	170.1	169.089	[M+H]+	C12H11N	A	10165	9148	14599	15927	6026.4	9471	18224	6643	20439	30074	6570.7	15185	38193	60925	28954	49482	43891	15368	11799	24262	26427	22115	20233	75190	36174	32955	30889	27119	33715	27384	14138	10746	12274	12796	12266	6559.8	26345	40896	17853	32722	22528
MEDP0791	4-Aminophenol	Benzene and substituted derivatives	Phenolics	110.2	109.053	[M+H]+	C6H7NO	B	438400	462350	593510	465930	504520	617880	471010	457940	401940	497770	456480	417210	492340	586320	502140	624790	596190	499560	1342200	1485900	1642200	1385500	1247400	492960	1755100	1688400	1915100	1739200	1999200	1769100	70566	60734	59618	81539	61181	75422	990280	739550	800540	865120	636640
MEDP0798	1-Naphthylamine	Benzene and substituted derivatives	Benzene and substituted derivatives	144.1	143.073	[M+H]+	C10H9N	A	9	9	9	9	9	9	9	9	9	9	9	9	31305	41517	42646	29268	40960	25187	9	9	9	9	9	36590	9	9	9	9	9	9	9	9	9	9	9	9	9	9	9	9	9
MEDP0892	Catechol	Benzene and substituted derivatives	Phenolics	111.1	110.037	[M+H]+	C6H6O2	A	6110300	5875100	5485500	5790900	6102600	5963500	5226300	5583800	5324200	5666800	5280300	5197600	6448400	6683300	6466300	6435800	6201700	6091400	6403400	6173000	6058100	6314500	6375800	6364300	6793900	6484600	6787200	6818400	7238300	6708300	6189100	6271200	6122600	5982300	6068300	6185000	7141200	7155600	7258800	7262100	7351400
MEDP1003	Hydroxyphenylethylamine	Benzene and substituted derivatives	Benzene and substituted derivatives	120.082	137	[M+H]+	C8H11NO	A	438390	570320	408440	483680	567330	439240	400320	357940	483350	296610	335050	403500	488760	663940	651840	655510	640010	712710	564900	564040	548560	638250	462690	681520	304690	290620	244500	271850	284090	291260	196960	196500	234240	163660	218930	188270	402310	606440	488950	554690	470670
MEDP1031	Phenethyl alcohol	Benzene and substituted derivatives	Benzene and substituted derivatives	105.1	122.073	[M-H2O+H]+	C8H10O	A	23943000	27315000	17561000	24924000	25877000	23425000	18560000	16739000	22097000	13674000	16867000	18654000	26333000	31545000	30045000	29183000	30348000	33056000	27697000	26469000	29793000	26818000	24149000	32111000	15980000	15406000	14655000	14622000	15046000	18504000	10599000	10486000	11545000	10607000	12297000	12167000	25636000	23261000	25843000	27488000	25187000
MEDP1033	Benzaldehyde	Benzene and substituted derivatives	Benzene and substituted derivatives	107.048	106.042	[M+H]+	C7H6O	A	8654800	10339000	7186400	9369800	10333000	8990300	6673400	5817300	9152300	4743600	5754200	6498500	9940000	12144000	11882000	11690000	10869000	12531000	10068000	10268000	11010000	9939300	9619000	12591000	5976700	5580100	4545200	4850900	5633200	5880000	3360800	3156300	3688500	3089600	3994600	3824200	8155000	10711000	9056300	10112000	9204600
MEDP1147	2 ', 6'-Dihydroxy-4'-methoxyacetophenone	Benzene and substituted derivatives	Benzene and substituted derivatives	183.056	182.058	[M+H]+	C9H10O4	B	188830	214240	194210	439950	136250	310770	154710	117000	423260	120110	184180	164290	164300	358130	566410	128550	258000	152960	474190	191990	207280	356060	321300	185160	419440	131580	283800	141220	267090	191140	116860	331450	99577	430520	143010	267570	319810	163440	434480	151200	319350
MEDP1234	Dopaquinone	Benzene and substituted derivatives	Benzene and substituted derivatives	196.06	195.053	[M+H]+	C9H9NO4	A	115390	87716	138200	176390	124420	110120	16357	17953	24114	11601	10923	31569	26820	33800	18670	24778	29946	23445	488220	706680	426860	558660	446640	28263	30251	21866	17711	9	32925	10463	92928	117860	152950	172950	148520	114870	19551	43628	39173	31774	46806
MEDP1242	4-tert-butylbenzoic acid	Benzene and substituted derivatives	Phenolic acids	179.106	178.099	[M+H]+	C11H14O2	B	325770	271010	279570	274990	316250	388700	243240	272340	271890	281460	266380	194680	340150	270290	266750	370460	333630	355990	280610	286720	271110	263870	272500	272430	269690	351640	319280	319500	366530	362090	304220	235460	251630	239060	256990	284270	334110	321390	283390	289410	342030
MEDP1288	Chrysophanol	Benzene and substituted derivatives	Benzene and substituted derivatives	255.056	254.058	[M+H]+	C15H10O4	A	17037	11860	9837.6	40201	363290	22584	9	9	9	9	9	9	9	9	9	9	9	9	10400	9	9	9	14850	9	9	9	9	9	9	9	9	9	9	9	9	9	9	9	9	9	9
MWC10002017	(2-Naphthyl)methanol	Benzene and substituted derivatives	Benzene and substituted derivatives	193.036	158.073	[M+Cl]-	C11H10O	B	10554	14690	7256.3	6390.2	8388.5	7200.2	9	4968.6	5601.4	7941.9	9765.6	5237.5	6903.7	10709	8028.4	9080.1	10238	6648.4	16403	5966.3	6549.2	6249.7	10838	8042.7	11935	12532	7219.8	7089	11768	5038.7	8919.5	8695.4	8059.3	14140	6706.7	9135.8	6629.2	4268.8	9580.5	9	10536
MWC10149390	1-Naphthol -D-glucuronide	Benzene and substituted derivatives	Benzene and substituted derivatives	285.076	320.09	[M+H-2H2O]+	C16H16O7	A	9	9	9	9	9	9	203040	194700	2441000	54932	63453	511850	9	9	9	9	9	9	9	9	9	9	9	9	9	9	9	9	9	9	9	9	9	9	9	9	9	9	9	9	9
MWC10116429	2-(3,4-dihydroxy-5-methoxyphenyl)-5,7-dihydroxy-4H-chromen-4-one	Benzene and substituted derivatives	Phenolic acids	356.078	316.058	[M-H+CH3CN]-	C16H12O7	B	9	9	9	9	9	9	42709	87643	83998	31581	45778	11783	9	9	9	9	9	9	9	9	9	9	9	9	9	9	9	9	9	9	9	9	9	9	9	9	9	9	9	9	9
MWC10001764	2,4'-Dihydroxyacetophenone	Benzene and substituted derivatives	Benzene and substituted derivatives	194.074	152.047	[M-H+CH3CN]-	C8H8O3	A	270820	946250	341140	384730	292230	98675	26180	25365	41504	21999	34868	40073	63320	118700	56412	82554	41257	52510	1917100	2097800	2092600	1964800	2267400	69146	127430	83814	112180	135220	85965	100030	50766	65364	64491	72009	89484	72228	1040000	780810	749810	1115900	1347200
MWC10149903	2-Nitrophenol	Benzene and substituted derivatives	Phenolics	138.019	139.027	[M-H]-	C6H5NO3	B	203930	275240	183140	197620	208840	212750	187910	148280	191070	247030	183790	123070	5389600	3384000	4061600	4614600	3868000	4385000	179710	207430	210820	223520	203250	3860500	247940	497990	311750	363130	221610	261020	227260	208120	174900	188430	162060	179330	198780	168050	217270	214170	181950
MWC10127794	3-(2,5-dimethoxyphenyl)propanoic acid	Benzene and substituted derivatives	Phenolics	231.062	210.089	[M+Na-2H]-	C11H14O4	B	137990	151910	95017	89754	152670	235290	13118	16591	8314.4	15144	8386.1	10978	69792	51403	89930	54565	52233	46414	38966	37976	39185	43746	29972	74978	34934	30783	32374	39012	27511	29910	18463	22728	28962	22203	24029	18995	23916	14626	20503	20062	17592
MWC10141627	3-Methoxy-4-hydroxyphenylethylene glycol	Benzene and substituted derivatives	Phenolics	183.066	184.074	[M-H]-	C9H12O4	A	9	9	9	9	9	9	337200	247260	346210	543560	449710	474540	3182.4	3771.4	9463.8	7148.4	13384	12863	18685	36389	25178	20266	19820	9620	9	9	9	9	9	9	9	9	9	9	9	9	9	9	9	9	9
MWC10141427	4-Hydroxy-3-methoxybenzyl alcohol	Benzene and substituted derivatives	Phenolics	196.097	154.063	[M+CH3CN+H]+	C8H10O3	A	20763000	74478000	27133000	31274000	26402000	9689600	1764200	1591700	2485100	1916000	2184000	3090600	5587700	9863000	4900500	7258600	4204600	5265200	58122000	66638000	66678000	59855000	64814000	7058300	7372300	4148600	5881900	9272800	5798500	6226500	3483800	4344300	3701700	4337200	5631600	4207400	86731000	62503000	59335000	83779000	104220000
MWC10001112	4-Hydroxybenzeneacetonitrile	Benzene and substituted derivatives	Benzene and substituted derivatives	289.09	133.053	[2M+Na]+	C8H7NO	B	9	9	9	9	9	9	9	9	9	9	9	9	191620	134990	142060	334150	221840	158600	9	9	9	9	9	158470	14085	26224	18971	9	33508	14617	9	9	9	9	9	9	9	9	9	9	9
MWC10137530	4-Phenylbutan-2-ol	Benzene and substituted derivatives	Benzene and substituted derivatives	151.111	150.104	[M+H]+	C10H14O	B	9	9	9	9	9	9	9	9	9	9	9	9	9	9	9	9	9	9	9	9	9	9	9	9	9	9	9	9	9	9	1563100	1477100	2037500	2007700	2291100	1472100	9	9	9	9	9
MWC10003571	5-Hydroxyconiferyl alcohol	Benzene and substituted derivatives	Phenolics	195.064	196.074	[M-H]-	C10H12O4	A	35847	129080	47892	51613	31667	17410	9	9	9	15980	10761	9	7865.5	12712	3765.6	13296	6259.7	4173.8	106790	99040	110540	93111	96834	9161.2	19155	14161	13249	16238	13701	18650	3745	15544	9978.6	18229	13515	10420	154290	105260	117770	176840	200090
MWC10150827	5-Hydroxydopamine	Benzene and substituted derivatives	Phenolics	152.07	169.074	[M+H-H2O]+	C8H11NO3	B	248960	434660	210830	225850	229500	124320	1010400	486350	1209100	1141000	1159000	1429400	653300	648470	635070	569770	805590	881340	1984000	2308600	2345700	1779500	1988700	566870	9	134510	119330	172190	92311	95540	412260	412130	366670	273250	313690	354160	7154600	6384900	4976000	7638900	10324000
MWC10004405	5-Sulfosalicylic acid	Benzene and substituted derivatives	Benzene and substituted derivatives	260.022	217.989	[M+CH3CN+H]+	C7H6O6S	B	9	9	9	9	9	9	86111	68759	122990	58097	108900	101680	9	9	9	9	9	9	9	9	9	9	9	9	9	9	9	9	9	9	9	9	9	9	9	9	9	9	9	9	9
MWC10006835	6-Phosphogluconic acid	Benzene and substituted derivatives	Benzene and substituted derivatives	275.017	276.025	[M-H]-	C6H13O10P	A	9	9	9	5918.4	9	9	48127	73774	36802	33484	44799	38852	7189.2	13411	15197	10730	35397	28731	27541	15370	11888	20428	15448	13648	34731	17346	22610	40395	32666	51147	72529	77677	76890	109410	61844	87031	25045	8241	11178	19117	28367
MWC10128227	AMC Arachidonoyl Amide	Benzene and substituted derivatives	Benzene and substituted derivatives	462.298	461.293	[M+H]+	C30H39NO3	B	734370	1199900	546540	677710	779610	499120	4215700	3562000	3723800	3911800	4627400	4435000	307990	285790	313490	439850	428000	351040	20419	25000	26464	22419	29434	304670	9	9	9	9	9	9	414760	497180	534290	543430	512840	256490	9	9	9	9	9
MWC10000388	Aniline	Benzene and substituted derivatives	Benzene and substituted derivatives	94.0644	93.0578	[M+H]+	C6H7N	B	1708600	2008000	1212600	968380	1548200	1193800	442090	260800	315770	246950	231690	245390	212290	179250	226420	215350	316330	377420	179160	131510	191770	146910	148250	210990	118580	117820	97942	154070	690790	68295	3011300	3377700	3035900	3491900	3460700	3730200	593900	633130	704950	863870	622280
MWC10000786	Benzamide	Benzene and substituted derivatives	Benzene and substituted derivatives	122.059	121.053	[M+H]+	C7H7NO	B	1386500	1191600	789440	1100900	1204600	1489800	1416800	529820	1301200	2753600	1050000	1094800	2441500	2288300	1659100	2066600	1794300	1802800	1815300	1366400	1501900	1394300	1519000	2355000	2610100	4230600	2796700	3485900	2075200	2432600	1358800	797280	578570	654190	800570	1039500	2652000	1811200	1833800	2277800	1998700
MWC10149612	Benzylamine	Benzene and substituted derivatives	Benzene and substituted derivatives	154.085	107.073	[M+HCOO+2H]+	C7H9N	B	47338000	44352000	44222000	45848000	45868000	44953000	45002000	44909000	47399000	45634000	44143000	43616000	52185000	52173000	50637000	52298000	53081000	52067000	48678000	48646000	50329000	51295000	49410000	50525000	50591000	49507000	51217000	51479000	50225000	50462000	47328000	45107000	47669000	43251000	45478000	45141000	49920000	52087000	52868000	51101000	52300000
MWC10150374	Cinnabarinic acid	Benzene and substituted derivatives	Benzene and substituted derivatives	301.045	300.038	[M+H]+	C14H8N2O6	B	9	9	9	9	9	9	5013500	5895000	6159700	2543400	6076300	2261800	9	9	9	9	9	9	9	9	9	9	9	9	9	9	9	9	9	9	9	9	9	9	9	9	9	9	9	9	9
MWC10144922	Di(2-ethylhexyl)phthalate (DEHP)	Benzene and substituted derivatives	Benzene and substituted derivatives	391.284	390.277	[M+H]+	C24H38O4	A	311760	366660	559610	307700	419670	322710	392960	397160	238410	261670	419820	357900	366880	272950	322250	273670	301600	331850	234340	224370	302380	305380	281250	238010	343800	375860	317020	485810	323100	297190	293470	318200	232780	304870	277750	225790	358040	538530	301520	195620	214200
MWC10003382	diethyltoluamide	Benzene and substituted derivatives	Benzene and substituted derivatives	192.138	191.131	[M+H]+	C12H17NO	B	705140	716890	602790	743580	683520	710310	897450	786110	784780	996970	933270	729200	929800	987060	1065000	1112900	1047200	953720	874000	952840	1041000	952870	953260	939380	1040200	1149600	1247900	1103200	1038500	977510	659310	638710	741900	645540	638370	656880	1013100	1225000	1059300	1072100	1067700
MWC10001237	Dimethylaniline-N-oxide	Benzene and substituted derivatives	Benzene and substituted derivatives	156.076	137.084	[M+F]-	C8H11NO	B	1754500	1856200	1679200	1721400	1681000	1773100	1616300	1636100	1734900	1670600	1640700	1598500	1594300	1559400	1559200	1648900	1496300	1490700	1816300	1729900	1683500	1793100	1719500	1513400	1794000	1670100	1674800	1681600	1699500	1710000	1825300	1787000	1822500	1777900	1813000	1759600	1682400	1773600	1706200	1661100	1738100
MWC10011735	Dioctyl phthalate	Benzene and substituted derivatives	Benzene and substituted derivatives	391.284	390.277	[M+H]+	C24H38O4	A	310190	383180	614430	332600	312450	434970	383540	626910	400870	347260	376640	397130	301600	313280	274530	279870	325490	267800	315590	241100	337730	267170	336620	259490	385610	325800	317950	386350	360880	344270	306550	272880	222310	246470	241150	243900	356420	273000	350380	256460	160050
MWC10126461	DIPHENYLUREA	Benzene and substituted derivatives	Benzene and substituted derivatives	211.09	212.095	[M-H]-	C13H12N2O	B	52119	145400	54507	11705	61395	52134	10065	9	8777.4	14385	12417	3142.7	61198	9642.7	8819.5	7064	8719	19697	14219	9236.3	22451	21114	13143	6966.3	99001	184180	78943	119340	83848	109120	15896	25167	7104.1	15853	9240.5	14903	8811.6	16818	8614.9	8889.3	8398.8
MWC10144257	Dodecylbenzenesulfonic acid	Benzene and substituted derivatives	Benzene and substituted derivatives	325.186	326.192	[M-H]-	C18H30O3S	B	8443.2	6594.5	8402.7	6613.5	8721.7	7937.8	4851.7	6499.6	4981.2	6869.3	3249.6	6660.1	9	9	9	9	9	9	5793.7	2723.4	8384.2	7179.5	7348.1	6056.5	5706.9	4561.2	5557.2	5101.6	5970.7	6119.7	4824.9	5211.7	6788.5	5927.6	4779.6	5207.6	9	9	9	1906.2	4109.2
MWC10004101	N-Benzyloxycarbonylglycine	Benzene and substituted derivatives	Benzene and substituted derivatives	208.062	209.069	[M-H]-	C10H11NO4	A	9	9	9	9	8408.3	5159.5	56381	42082	72401	52920	55734	73642	235220	206880	290190	297390	398650	372340	45009	59377	43910	48528	43766	273590	86664	95155	97433	103040	66547	69338	31702	28559	30948	24507	24454	27937	174070	149660	145740	173100	247970
MWC10001728	N-Methyltyramine	Benzene and substituted derivatives	Benzene and substituted derivatives	186.087	151.1	[M+Cl]-	C9H13NO	A	328720	119230	105900	93502	199790	172830	113020	116720	65363	103670	90693	67923	148600	83700	55032	141360	135260	145990	149600	134370	128510	106170	100040	104620	195530	190830	155870	773200	146240	182120	162140	151410	369070	176050	192620	208270	98417	112790	127610	107550	141080
MWC10141718	NORMETANEPHRINE	Benzene and substituted derivatives	Benzene and substituted derivatives	225.124	183.09	[M+CH3CN+H]+	C9H13NO3	A	61836	42150	34628	145290	111610	9	164880	91140	272070	232730	213790	374870	9	9	9	9	9	9	10734000	15531000	14518000	11320000	14029000	33797	141170	323200	790900	157120	530160	128480	5211100	2965900	4740200	5551800	5284400	3901400	4121800	2847900	3737100	3722600	2810700
MWC10142330	O-Methyl anthranilate	Benzene and substituted derivatives	Benzene and substituted derivatives	150.056	151.063	[M-H]-	C8H9NO2	A	1736000	1874100	1243700	814860	1693900	1958500	1034200	460640	801060	2299900	728560	724280	2367200	1553400	826770	922420	1009500	1088900	1352200	1164900	1349600	1124400	1066200	1651600	2211400	4235900	2657300	3545400	2063200	2313400	1613200	1341400	407150	740740	743980	1180700	1606200	1004400	1038800	1557400	1323400
MWC10127290	Palmitoyl dopamine	Benzene and substituted derivatives	Phenolics	390.302	391.309	[M-H]-	C24H41NO3	B	9	9	9	9	2675.8	1804.9	895520	1878900	595730	652940	1507300	1323100	2348.8	3791.2	2947.7	3150.2	5466.2	3259.8	9	9	9	9	9	5165.1	1218.2	2009.9	1498.7	1290.3	1611.9	1358.3	519500	139790	568040	231870	245970	177370	9358.4	6700.6	17856	8446.5	12150
MWC10138758	Phloroglucinol;1,3,5-Benzenetriol;1,3,5-Trihydroxybenzene	Benzene and substituted derivatives	Phenolics	127.038	126.032	[M+H]+	C6H6O3	B	9	9	9	9	9	9	9	9	9	9	9	9	606830	43355	9	9	951480	251120	68321	25613	68218	57498	9	30853	9	9	9	9	9	9	9	9	9	9	9	9	9	9	9	9	9
MWC10138592	Phytanate;Phytanic acid;3,7,11,15-Tetramethylhexadecanoic acid	Benzene and substituted derivatives	Benzene and substituted derivatives	381.298	312.303	[M+Na+HCOOH]+	C20H40O2	A	375560	322630	334960	336610	313980	263200	163330	192180	300160	183460	185170	148310	84821	87805	44657	78302	50408	108420	37002	41072	44438	39687	49068	115610	270120	427510	395820	252430	227510	357720	212450	239980	235820	237990	278100	356600	10947	6648.5	10125	3664.9	3844.8
MWC10143713	p-Methoxycinnamic acid ethyl ester	Benzene and substituted derivatives	Phenolics	413.195	206.094	[2M+H]+	C12H14O3	B	141110	161380	147260	134160	133620	100540	14853	18974	17175	19050	26061	19390	113110	86257	66056	113970	82116	83188	123540	151540	146940	197000	131170	93659	182040	147690	214940	185860	207400	165380	128370	113640	114770	84128	118610	155150	368590	338640	332860	265650	287680
MWC10126357	PPHP	Benzene and substituted derivatives	Benzene and substituted derivatives	161.096	178.099	[M+H-H2O]+	C11H14O2	B	834700	879910	889420	1820100	598530	1159000	714020	417830	1571900	458930	794630	704350	594440	1461800	2230600	508070	1059300	588970	1806200	796980	914590	1596400	1342200	789510	1731800	570980	1347600	549430	1111000	784020	443110	1321000	438160	1605700	522380	1071000	1371200	708600	1624600	711530	1403400
MWC10152214	S(-)-Cathinone	Benzene and substituted derivatives	Benzene and substituted derivatives	132.08	149.084	[M+H-H2O]+	C9H11NO	B	19827000	25721000	16253000	20762000	17635000	19820000	2035800	2101800	3925100	1895300	2471700	2330000	5069000	6239500	4594900	5740900	4934800	5047800	17428000	17471000	17728000	16717000	15524000	6181800	3642500	5867700	2976100	3636700	4677000	1682200	10545000	9828000	10918000	9244600	12916000	11370000	34442000	28629000	22018000	26274000	24955000
MWC10149821	Salicin	Benzene and substituted derivatives	Benzene and substituted derivatives	285.098	286.105	[M-H]-	C13H18O7	B	15256	27202	8816.2	12535	10587	13591	9	9	9	9	9	9	7068.5	13635	7147	8164.7	6262.1	11919	8970300	9613500	9612500	10237000	8646300	8529	9	9	9	9	9	9	9	9	9	9	9	9	9	9	9	9	9
MWC10154150	SALICIN	Benzene and substituted derivatives	Benzene and substituted derivatives	333.118	286.105	[M+HCOO+2H]+	C13H18O7	B	41457	27030	24455	21839	39645	24895	49036	40936	28469	32602	10228	27415	48591	58303	93388	58110	133940	54264	9	9	9	9	6319.6	43562	9	9	9	9	9	9	9	9	9	9	9	9	5212.4	18857	12102	9	6017.1
MWC10141908	Tectoridin	Benzene and substituted derivatives	Phenolic acids	461.108	462.116	[M-H]-	C22H22O11	B	9	9	9	9	9	9	9	9	9	9	9	9	144190	183600	199050	113170	161400	165990	131710	134230	147880	140770	159030	202600	9	9	9	9	9	9	4058.4	3511.6	5123.6	7469.5	7519	5032.3	9	9	9	9	9
MWC10127192	Tenovin-1	Benzene and substituted derivatives	Benzene and substituted derivatives	387.181	369.151	[M+NH4]+	C20H23N3O2S	B	1013700	1118400	905810	1112500	1485900	826250	1077100	631730	1017200	684240	967780	878180	888070	826660	923140	1500200	932360	1197500	976970	1191000	1205700	1746900	1029200	980750	1381700	1587400	2048400	1451000	1644800	1432900	1224800	972850	967590	975290	1018900	1202900	1240400	1023800	826450	1169400	1262000
MEDN0105	Taurocholic acid	Bile acids	Bile acids	514.284	515.292	[M-H]-	C26H45NO7S	A	9	9	9	9	9	9	9	9	9	9	9	9	9	9	9	9	9	9	9	9	9	9	9	9	9	9	9	9	9	9	9	9	9	9	9	9	9	9	9	9	9
MEDN0109	Hododeoxycholic acid	Bile acids	Bile acids	391.285	392.293	[M-H]-	C24H40O4	A	9	9	9	9	9	9	9	9	9	9	9	9	9	9	9	9	9	9	9	9	9	9	9	9	9	9	9	9	9	9	9	9	9	9	9	9	9	9	9	9	9
MEDN0110	Glycoursodeoxycholic Acid	Bile acids	Bile acids	448.306	449.314	[M-H]-	C26H43NO5	A	9	9	9	9	9	9	9	9	9	9	9	9	9	9	9	9	9	9	9	9	9	9	9	9	9	9	9	9	9	9	9	9	9	9	9	9	9	9	9	9	9
MEDN0113	Glycochenodeoxycholic Acid	Bile acids	Bile acids	448.306	449.314	[M-H]-	C26H43NO5	A	9	9	9	9	9	9	198700	210570	161710	103290	164690	206590	9	9	9	9	9	9	9	9	9	9	9	9	9	9	9	9	9	9	9	9	9	9	9	9	9	9	9	9	9
MEDN1077	Alpha-Mercholic Acid	Bile acids	Bile acids	407.28	408.288	[M-H]-	C24H40O5	A	9	9	9	9	9	9	9	9	9	9	9	9	9	9	9	9	9	9	6745800	6421200	6286600	5961900	7944600	9	9	9	9	9	9	9	9	9	9	9	9	9	9	9	9	9	9
MEDN1113	12-ketolithocholic acid	Bile acids	Bile acids	389.269	390.277	[M-H]-	C24H38O4	B	9	9	9	9	9	9	9	9	9	9	9	9	9	9	9	9	9	9	9	9	9	9	9	9	70387	66800	80293	72701	78040	71787	275790	129770	414510	405350	335940	302670	9	9	9	9	9
MEDP0368	Taurocholic Acid Sodium Salt Hydrate	Bile acids	Bile acids	556.28	555.284	[M+H]+	C26H46NNaO8S	A	3090300	3409800	3401700	2950700	3327200	3035000	3315800	3160200	3281200	3611600	3424800	3186000	3653200	3585700	3638400	3729800	3766600	3272000	3271400	3487900	3684900	4242400	3468600	3454900	3488800	3140500	3942600	3026500	3536200	3392300	2407300	2540600	2021900	1815700	2324500	2408600	4316700	3675600	3746300	3532500	3584800
MEDN0120	Dulcitol	Carboxylic acids and derivatives	Sugar alcohols	181.071	182.079	[M-H]-	C6H14O6	A	30101	12228	19064	20631	12126	27782	135300	497720	203740	218960	516860	503480	100780	157170	189950	186620	182200	224270	140410	103020	216970	107280	109110	147600	130920	128200	1828100	276850	136050	169670	1028000	996110	968340	1060500	1171700	1075000	332900	205500	327040	213930	238550
MEDN0210	1,5-Anhydro-D-Glucitol	Carboxylic acids and derivatives	Sugar alcohols	163.061	164.069	[M-H]-	C6H12O5	A	14615	9	9	9	21770	30154	52211	61811	66817	45439	50958	78315	125370	197440	160560	130460	171340	83969	58106	58589	64156	49325	56071	176040	79650	73537	106960	77435	116870	70636	284820	219310	255280	205380	292450	271360	48259	47987	35008	41099	32117
MEDN0211	D-Arabitol	Carboxylic acids and derivatives	Sugar alcohols	151.061	152.069	[M-H]-	C5H12O5	A	9	9	9	9	9	9	84147	104100	63734	81989	81853	66835	17862	15360	14790	27391	36276	34888	15316	9930.2	11906	3644	15645	15801	39454	37734	55405	60537	37511	33824	35907	43846	37848	46484	54041	50780	9	9	9	9	9
MEDN0213	D-Sorbitol	Carboxylic acids and derivatives	Sugar alcohols	181.071	182.079	[M-H]-	C6H14O6	A	11910	9937.2	11614	5669.3	12520	14360	96227	429400	138330	157880	363710	463100	63420	120030	144110	118580	159550	203060	103180	59176	144300	63951	79236	105770	95064	85456	1240600	235470	84339	131720	745060	719970	780480	886490	858970	785520	235490	140140	237370	150370	153140
MEDN0220	D-Glucose	Carboxylic acids and derivatives	Sugars	179.056	180.063	[M-H]-	C6H12O6	A	102730	90574	85935	98344	132660	108010	121980	201250	163750	85436	156190	243030	66884	70908	74202	73097	89513	70533	190150	132080	139440	182640	176400	78726	336960	470490	420250	447240	370440	312830	953290	1001200	925500	1251300	1089700	1045400	73541	58785	64639	27784	31251
MEDN0221	D-Mannose	Carboxylic acids and derivatives	Sugars	179.056	180.063	[M-H]-	C6H12O6	A	182620	148150	244050	150400	163080	262130	140830	131180	303630	106410	104250	126950	60856	51255	62328	60187	80092	53452	789450	666480	696880	681920	632910	52034	1497000	2206900	1883600	2232100	1701700	1383000	818160	693900	665810	614890	758160	705050	56887	69879	71904	72054	63083
MEDN0224	D-Trehalose	Carboxylic acids and derivatives	Sugars	341.108	342.116	[M-H]-	C12H22O11	A	987920	670300	1083300	764500	784600	1070500	408490	892550	515140	562500	723520	696460	2884900	3518100	3750400	3418400	4046900	2721000	5927300	3030000	3895900	4390200	3360000	3260000	9289100	7376600	8723100	10108000	7795000	9124800	55972000	45115000	39039000	49663000	32082000	35058000	901540	1238500	1410100	1007700	1013500
MEDN0227	D-Glucose 6-Phosphate	Carboxylic acids and derivatives	Phosphate sugars	259.022	260.03	[M-H]-	C6H13O9P	A	14058000	9223000	15424000	9731200	13378000	14934000	83139000	136160000	115160000	135770000	134300000	107180000	40687000	38886000	35706000	30381000	39008000	41151000	57306000	46184000	48184000	45435000	41601000	37324000	291050000	280060000	250260000	267100000	265400000	267250000	187310000	188470000	177700000	195420000	149010000	165390000	38018000	53152000	46233000	31078000	30490000
MEDN0229	Lactose	Carboxylic acids and derivatives	Sugars	341.108	342.116	[M-H]-	C12H22O11	A	987920	670300	1083300	764500	784600	1070500	408490	892550	515140	562500	723520	696460	2884900	3518100	3750400	3418400	4046900	2721000	5927300	3030000	3895900	4390200	3360000	3260000	9289100	7376600	8723100	10108000	7795000	9124800	55972000	45115000	39039000	49663000	32082000	35058000	901540	1238500	1410100	1007700	1013500
MEDN0230	Lactulose	Carboxylic acids and derivatives	Sugars	341.108	342.116	[M-H]-	C12H22O11	A	987920	670300	1083300	764500	784600	1070500	408490	892550	515140	562500	723520	696460	2884900	3518100	3750400	3418400	4046900	2721000	5927300	3030000	3895900	4390200	3360000	3260000	9289100	7376600	8723100	10108000	7795000	9124800	55972000	45115000	39039000	49663000	32082000	35058000	901540	1238500	1410100	1007700	1013500
MEDN0233	Maltose	Carboxylic acids and derivatives	Sugars	341.108	342.116	[M-H]-	C12H22O11	A	987920	670300	1083300	764500	784600	1070500	408490	892550	515140	562500	723520	696460	2884900	3518100	3750400	3418400	4046900	2721000	5927300	3030000	3895900	4390200	3360000	3260000	9289100	7376600	8723100	10108000	7795000	9124800	55972000	45115000	39039000	49663000	32082000	35058000	901540	1238500	1410100	1007700	1013500
MEDN0234	Maltotriose	Carboxylic acids and derivatives	Sugars	503.161	504.169	[M-H]-	C18H32O16	A	9	9	9	9	9	9	9	9	9	9	9	9	9	9	9	9	9	9	94665	39190	63155	48970	42360	8407.9	20242	9566.4	42194	30315	16670	25171	862540	717170	835220	1600500	649950	796680	9	13705	23545	6460	8573.8
MEDN0237	D-Glucoronic Acid	Carboxylic acids and derivatives	Sugar acids	193.035	194.043	[M-H]-	C6H10O7	A	52951	38356	101600	53771	63966	44011	138610	192390	97891	101120	136540	155630	350310	489530	563770	440940	536150	460940	210770	145930	188510	116920	120280	579450	231720	173970	239540	241980	172800	282830	1852900	1634500	1634200	1846600	1718900	1702400	256620	428250	335870	203720	225350
MEDN0463	D-Fructose 6-Phosphate-Disodium Salt	Carboxylic acids and derivatives	Phosphate sugars	259	304.1	[M-2Na+H]-	C6H11Na2O9P	A	609170	522170	854370	319750	675940	786650	9585800	15705000	11842000	13837000	13803000	12216000	2182300	3325500	2705600	2177300	3221500	2365000	9571200	6330500	8075200	7999700	8056100	2980400	58558000	54340000	47306000	48580000	48764000	62860000	25929000	27758000	26270000	25568000	26125000	23295000	5189300	7691100	4424100	3479200	3244800
MEDN0485	D-Fructose-1,6-Biphosphate-Trisodium Salt	Carboxylic acids and derivatives	Phosphate sugars	339	405.942	[M-3Na+2H]-	C6H11Na3O12P2	A	854030	325420	644180	551910	415040	1049200	5109100	25640000	12817000	13245000	13825000	14955000	738610	1269600	961570	874190	1121400	1064500	11563000	7813200	6990300	11769000	17815000	2070300	474170	1864000	1062100	189080	522870	451780	43764000	5047500	36850000	25339000	11788000	15426000	775580	647650	458460	450600	385200
MEDN0498	Ribulose-5-Phosphate	Carboxylic acids and derivatives	Phosphate sugars	229.011	230.019	[M-H]-	C5H11O8P	A	138010	682290	630600	213750	479370	183300	10089000	7108800	14990000	16270000	7124000	10485000	9	9	9	9	9	9	1253200	951580	1197500	1034700	1131900	128810	44691000	47582000	51570000	48803000	47032000	47058000	1832400	2709900	2249600	2287600	2241800	2082700	485090	574610	465460	568820	481110
MEDN0502	2-Deoxyribose 1-Phosphate	Carboxylic acids and derivatives	Phosphate sugars	213.016	214.024	[M-H]-	C5H11O7P	A	9	9	9	9	9	9	175810	285510	452060	267420	296570	292900	214670	182050	175090	81964	144750	141150	112990	73914	123990	125960	110770	106860	345990	731720	507870	467330	524360	535800	9	9	9	9	9	9	97958	115150	72061	105610	101510
MEDN0506	N-Acetylglucosamine 1-Phosphate	Carboxylic acids and derivatives	Phosphate sugars	300.048	301.056	[M-H]-	C8H16NO9P	A	906860	1450300	2130600	1843300	1752800	1484800	9876600	14846000	4518300	8553300	7139300	20749000	7154300	4188700	6089100	4873900	7183300	5339700	4848200	4696900	4224300	3823800	4060400	5010100	4351200	3163700	3287800	4290700	3719000	2575100	3681900	5380200	3568500	3701300	5054800	3978600	1755000	1733700	1277900	1072200	1194600
MEDN0531	D-Glucarate	Carboxylic acids and derivatives	Sugar acids	209.03	210.038	[M-H]-	C6H10O8	A	555300	551660	529440	552050	553240	633270	204560	229670	321040	200700	231770	307580	315890	580690	323230	315350	344300	398510	348970	516550	768830	464670	570770	492790	358740	437030	384650	451760	378650	281450	743730	504170	659640	687530	691850	595910	301600	375970	320510	257950	222550
MEDN0539	3'-Sialyllactose	Carboxylic acids and derivatives	Sugars	632.204	633.212	[M-H]-	C23H39NO19	A	9	9	9	9	9	9	9	9	9	9	9	9	9	9	9	9	9	9	12319	6198.1	10702	12955	11532	9775	54684	43398	33341	50783	32190	28549	23152	21926	25951	25889	20818	11365	9	9	9	9	9
MEDN0657	D-Xylulose 5-phosphate	Carboxylic acids and derivatives	Phosphate sugars	229.011	230.019	[M-H]-	C5H11O8P	A	138010	682290	630600	213750	479370	183300	10089000	7108800	14990000	16270000	7124000	10485000	9	9	9	9	9	9	1253200	951580	1197500	1034700	1131900	128810	44691000	47582000	51570000	48803000	47032000	47058000	1832400	2709900	2249600	2287600	2241800	2082700	485090	574610	465460	568820	481110
MEDN0808	Myoinositol	Carboxylic acids and derivatives	Sugar alcohols	179.056	180.16	[M-H]-	C6H12O6	A	182620	148150	244050	150400	163080	262130	140830	131180	303630	106410	104250	126950	60856	51255	62328	60187	80092	53452	789450	666480	696880	681920	632910	52034	1497000	2206900	1883600	2232100	1701700	1383000	818160	693900	665810	614890	758160	705050	56887	69879	71904	72054	63083
MEDN0832	D-Glucosamine 6-Phosphate	Carboxylic acids and derivatives	Phosphate sugars	258.038	259.151	[M-H]-	C6H14NO8P	A	9	9	9	9	9	9	616870	366630	653780	530570	675500	587160	37624	68426	49363	45292	34074	42299	1425100	1022000	1166500	1024500	1185200	28104	480790	639720	448590	425720	420120	320800	263180	258230	165020	186600	229270	168490	164920	305390	136090	79650	113670
MEDN1018	Ribitol	Carboxylic acids and derivatives	Sugar alcohols	151.061	152.069	[M-H]-	C5H12O5	A	9	9	9	9	9	9	84147	104100	63734	81989	81853	66835	17862	15360	14790	27391	36276	34888	15316	9930.2	11906	3644	15645	15801	39454	37734	55405	60537	37511	33824	35907	43846	37848	46484	54041	50780	9	9	9	9	9
MEDN1057	2-c-methyl-d-erythritol 2,4-cyclodiphosphate	Carboxylic acids and derivatives	Phosphate sugars	276.988	277.996	[M-H]-	C5H12O9P2	B	9	157770	167880	92935	169980	117260	4859400	12876000	6442800	5574200	9919500	12249000	98695	120640	169410	121450	196370	192740	660970	436960	759310	372540	458300	114150	1551100	2580700	1982500	2107800	2052200	1066300	2600800	5413100	4080200	5773600	5466700	5314400	160340	147080	219440	114530	99467
MEDN1087	UDP-D-galactose	Carboxylic acids and derivatives	Sugars	565.048	566.055	[M-H]-	C15H24N2O17P2	A	29306000	34044000	38905000	27274000	32099000	49287000	12093000	8844800	9895900	13989000	10171000	12659000	37940000	35654000	39988000	37785000	36362000	37984000	45649000	38733000	47124000	41286000	41908000	39791000	78312000	78526000	92540000	94103000	90159000	88846000	41182000	37727000	42965000	40561000	40212000	34348000	48015000	52987000	39911000	40122000	42306000
MEDN1108	1,6-anhydro-β-D-glucose	Carboxylic acids and derivatives	Sugars	161.045	162.053	[M-H]-	C6H10O5	A	50924	178530	102630	114150	93572	34098	14615	31300	14540	20530	26805	57084	4813.5	17606	19052	14952	9299.5	29384	37890	13086	6642.8	15803	32134	20607	35186	49604	43523	67549	33456	39463	130930	194670	168380	179110	234040	196780	51854	48944	144160	53268	30066
MEDN1314	Mucic Acid	Carboxylic acids and derivatives	Sugar acids	209	210.038	[M-H]-	C6H10O8	B	407450	396690	388820	347400	296340	386180	138040	121630	152710	119470	128510	148580	116730	144360	122610	105490	147560	120170	169330	296060	362820	129870	281270	223070	173430	180080	154870	171980	150240	137310	198980	262380	225140	211580	212950	245540	184060	233880	192620	123900	126450
MEDP0067	N-Acetylmannosamine	Carboxylic acids and derivatives	Sugars	222	221.09	[M+H]+	C8H15NO6	A	27841	50852	271930	179290	160300	81268	118720	108800	83108	96251	52110	62255	73784	125490	116500	75110	117960	80740	31223	61647	39575	30187	44759	108590	60506	60687	107040	136590	63433	40221	542290	352650	353980	306490	401090	329730	14702	36013	6546.5	12483	14936
MEDP0217	Dl-Threitol	Carboxylic acids and derivatives	Sugar alcohols	123.1	122.058	[M+H]+	C4H10O4	B	21380	43444	43602	31979	40880	29511	46432	35529	17912	18931	32702	55402	13202	3989.7	18514	30852	24748	24091	23940	12911	36148	25308	36750	9400.6	37022	25682	15514	34624	35309	30840	30345	24207	29581	28854	24176	37296	22043	22714	40794	31608	15768
MEDP0218	D-Mannitol	Carboxylic acids and derivatives	Sugar alcohols	183.08	182.079	[M+H]+	C6H14O6	A	14600	23645	11119	15162	24745	12135	57956	355990	98814	105020	282730	294010	110310	202980	310080	192130	263360	308440	57186	50799	78365	46903	64533	208320	58291	19014	284310	66146	18957	35863	352140	356300	334200	397340	284910	363870	185150	106920	304640	186160	204050
MEDP0224	D-Fructose	Carboxylic acids and derivatives	Sugars	181	180.063	[M+H]+	C6H12O6	A	16281000	16687000	16709000	14752000	16584000	16848000	12119000	14758000	10323000	10514000	9895500	11330000	9330700	11568000	12772000	11431000	10599000	11143000	16901000	14494000	15154000	15858000	15398000	10866000	14830000	34387000	16470000	17528000	15277000	18679000	10955000	9186900	10199000	11919000	8117300	9238200	10178000	10169000	9418700	12706000	14063000
MEDP0228	D-Melezitose	Carboxylic acids and derivatives	Sugars	505.169	504.169	[M+H]+	C18H32O16	A	49656	201750	143850	83891	91738	78070	14415	12286	9884.7	9634.5	11915	21546	57756	99607	110320	73590	80703	121250	47143	39165	53228	46295	47781	70902	23285	18385	16094	25238	16526	23642	478470	497140	604250	523270	423060	521780	30055	29308	40753	32536	21712
MEDP0232	N-Acetyl-D-Glucosamine	Carboxylic acids and derivatives	Sugar derivatives	222	221.09	[M+H]+	C8H15NO6	A	27841	50852	271930	179290	160300	81268	118720	108800	83108	96251	52110	62255	73784	125490	116500	75110	117960	80740	31223	61647	39575	30187	44759	108590	60506	60687	107040	136590	63433	40221	542290	352650	353980	306490	401090	329730	14702	36013	6546.5	12483	14936
MEDP0504	Glucosamine	Carboxylic acids and derivatives	Carboxylic acids and derivatives	180	179.079	[M+H]+	C6H13NO5	A	384790	430530	538180	473350	455810	398140	452380	457230	319800	495430	683810	474910	246590	400900	444040	300060	216530	230100	492920	421160	815670	226280	377990	238030	635550	462530	476440	459680	499340	422360	92519	204890	177300	98314	176730	70897	409170	486050	418130	477510	496340
MEDP1034	Stachyose	Carboxylic acids and derivatives	Sugars	689.208	666.222	[M+Na]+	C24H42O21	B	8163.3	9	8817	6696.7	3016.6	23126	111460	108230	130890	87828	102350	138400	10406	14713	16549	12881	11404	8675.5	6756.4	4717.3	8106	9	5361	8765.5	17630	37878	23691	21877	23483	24983	9	9	9	9	9	9	9	9	9	9	9
MEDP1136	D-Fructose 6-phosphate	Carboxylic acids and derivatives	Phosphate sugars	261.026	260.03	[M+H]+	C6H13O9P	B	203080	179720	218760	179470	170550	290100	589070	590750	607010	633250	755060	720720	319590	306180	289260	267890	307600	278590	1095100	1152800	936920	1033700	1139300	268170	2365800	2507300	2586600	2763900	2928300	2758300	1229200	1232400	1035600	1227200	1021900	972880	807010	937710	679700	587410	571450
MEDP1246	2,4-diacetamino-2,4,6-triphenoxy-D-mannopyranose	Carboxylic acids and derivatives	Sugar derivatives	247.1	246.122	[M+H]+	C10H18N2O5	A	666950	619480	671010	773160	2730200	1047700	7017800	6528300	4887600	4279000	9388400	8470300	818750	1536200	1144900	1250700	633430	1754000	973640	925620	672450	889530	711970	1574200	482420	513430	691860	700860	525000	653980	599610	577340	550770	428780	708400	449450	619840	604630	1134900	847660	507390
MWC10001549	2-Dehydro-3-deoxy-L-arabinonate;2-Dehydro-3-deoxy-L-pentonate	Carboxylic acids and derivatives	Sugar derivatives	167.037	148.037	[M+F]-	C5H8O5	A	3817400	11411000	2739400	3867900	4743000	3041800	1823100	1842800	1747000	1512700	1580100	1535400	3042600	1902300	2178700	2120900	2787000	2836700	23858000	36020000	19630000	20537000	21748000	3127800	11491000	8184600	7172400	6029400	7219100	6261400	284590	337500	328740	240170	251980	254740	32395000	26817000	23265000	18153000	14636000
MWC10002157	2-Dehydro-3-deoxy-L-rhamnonate	Carboxylic acids and derivatives	Sugar derivatives	180.085	162.053	[M+NH4]+	C6H10O5	A	9	9	9	9	9	9	78187	35195	53742	58735	39688	72473	31663	37904	41634	35211	37082	46002	9	9	9	9	9	9	634400	716720	567780	518840	580050	650070	95972	90310	135540	86624	151420	155220	9	9	9	9	9
MWC10002822	2-Keto-3-deoxy-D-gluconic acid	Carboxylic acids and derivatives	Sugar derivatives	247.041	178.048	[M+Na+HCOOH]+	C6H10O6	B	36862	54082	47131	28485	31375	30401	89268	129500	156380	179160	120180	193110	34081	47395	26946	31934	42890	35389	84024	60199	48748	52886	63348	45043	82193	110360	132420	112560	101900	92724	112530	68069	162110	112530	85990	54210	49204	99357	105560	48723	84605
MWC10153154	2-Keto-L-gulonic acid	Carboxylic acids and derivatives	Sugars	215.033	194.043	[M+Na-2H]-	C6H10O7	B	50007	48262	39638	41510	56385	76760	1164100	1279700	1125600	1029400	2801900	1350100	292270	360390	372020	368320	382210	271740	1703600	1501500	1407000	1567500	1292300	337420	8250600	10184000	9452900	8665400	8241100	5770200	1433100	1398600	1602100	1638100	1466300	1433700	3481900	3154500	4065800	3412400	3365600
MWC10005860	3-beta-D-Galactosyl-sn-glycerol;Galactosylglycerol	Carboxylic acids and derivatives	Sugar derivatives	253.096	254.1	[M-H]-	C9H18O8	B	9	9	9	9	9	9	9	9	9	1659400	684910	424060	7854000	13322000	8625200	13132000	13451000	8369300	45282000	46962000	48197000	49317000	45681000	13563000	9	9	9	9	61992	100800	453590	68633	504040	208550	70067	103010	3710700	4124900	2196300	2786900	3059500
MWC10063779	3-Deoxy-D-glycero-D-galacto-2-nonulosonic acid	Carboxylic acids and derivatives	Sugars	267.069	268.079	[M-H]-	C9H16O9	B	44325	33513	79281	33755	52227	67688	48883	37047	41436	27342	38280	32595	18060	37675	25689	19950	23225	21249	71390	44163	56214	55128	64528	21518	72692	71864	109880	88637	72118	121010	55495	81846	79953	84701	94291	85034	79217	121110	81988	93547	98404
MWC10139386	3-Ketolactose	Carboxylic acids and derivatives	Sugars	417.023	340.101	[M-H+2K]+	C12H20O11	B	10042	16907	7251	17846	13168	13594	78539	55412	66498	31920	27962	66973	21936	23443	18169	31505	27780	69623	15614	17946	7387.2	9	9489.8	33968	9	9	9	9	9	9	14976	9482	10686	6181.1	16990	19159	13836	16536	42813	14289	14452
MWC10152881	3-Phospho-D-glycerate	Carboxylic acids and derivatives	Sugars	224.961	185.993	[M+K]+	C3H7O7P	B	15992000	13103000	11410000	11011000	13139000	17482000	33742000	33168000	32572000	38453000	32065000	34170000	26941000	31456000	28924000	29476000	31931000	24014000	44793000	44694000	45011000	43111000	45372000	30067000	26882000	39002000	32712000	34920000	30676000	29579000	34614000	32034000	31904000	30270000	32486000	33462000	39589000	38651000	36394000	35549000	35069000
MWC10004028	4-(2-Aminophenyl)-2,4-dioxobutanoic acid	Carboxylic acids and derivatives	Sugars	230.042	207.053	[M+Na]+	C10H9NO4	A	9	9	9	9	9	9	9	9	9	9	9	9	9	9	9	9	9	9	9	9	9	9	9	9	177240	76263	247160	117780	214920	221160	9	9	9	9	9	9	9	9	9	9	9
MWC10004687	4-[(Hydroxymethyl)nitrosoamino]-1-(3-pyridinyl)-1-butanone	Carboxylic acids and derivatives	Sugars	292.086	223.096	[M+Na+HCOOH]+	C10H13N3O3	B	113820	367800	328740	283880	597080	162710	2092900	1643300	2454000	1020000	1751700	2230600	93867	230930	350000	150230	119890	594690	58205	65022	48255	36797	54301	268040	150780	62309	187280	192430	52871	52864	119930	150680	134590	131650	157480	116770	183570	212830	342220	222940	118610
MWC10138137	4-Aminobutyraldehyde;4-Aminobutanal	Carboxylic acids and derivatives	Sugars	70.0651	87.0684	[M+H-H2O]+	C4H9NO	A	707290	568550	882680	880270	717220	762520	771100	844470	866330	906650	850670	953230	517130	461640	410840	569510	503170	365220	626870	527280	651800	619920	571450	494440	1334200	1456500	1451900	1267500	1363200	1420500	1109600	1169800	1237900	1182900	1188200	1183800	1336100	1424600	1188000	1158300	996920
MWC10144650	4-Oxo-2-nonenal	Carboxylic acids and derivatives	Sugars	201.114	154.099	[M+HCOO+2H]+	C9H14O2	B	9	9	9	9	9	9	7187.7	16393	13324	26614	17437	28743	9	9	9	9	9	9	9	9	9	9	9	9	9	9	9	9	9	9	3965900	7538300	5320700	5631700	8800200	7976500	9	9	9	9	9
MWC10149960	4-Oxo-4-(3-pyridyl)butanal	Carboxylic acids and derivatives	Sugars	146.059	163.063	[M+H-H2O]+	C9H9NO2	B	56495000	71919000	49286000	56515000	52161000	58025000	6873300	6996200	13646000	5869500	7760900	7274000	17233000	19737000	16332000	19024000	16799000	17008000	53580000	52474000	54332000	52008000	45558000	21570000	12401000	18880000	9184800	13073000	14421000	5829600	31678000	30831000	31972000	31530000	37289000	34845000	94019000	80776000	65973000	75744000	70622000
MWC10015956	5,10-Methylenetetrahydromethanopterin	Carboxylic acids and derivatives	Sugars	807.265	788.263	[M+F]-	C31H45N6O16P	A	9	9	9	339.07	658.89	330.82	2319.3	662.85	1943.8	9	9	670.57	6836.8	13305	8549.6	10237	7845.5	10230	1266.7	1306.5	3755.6	1628.8	2632.8	13313	9	9	9	9	3066.8	9	9	9	9	9	9	9	5807.5	4106.9	4106	10575	12298
MWC10004618	6-Acetyl-D-glucose	Carboxylic acids and derivatives	Sugar derivatives	223.079	222.074	[M+H]+	C8H14O7	A	284610	367430	256290	375130	334340	321410	757200	611540	729020	862940	741840	783630	2478400	2125700	2312900	2513400	2447100	2184500	464750	321580	337810	360120	255550	2072300	191040	270700	247050	272940	248130	348080	1432900	1609700	1636500	1268300	1626800	1912400	511540	520840	701090	758210	406990
MWC10009892	Alpha-D-Glucose 1,6-bisphosphate	Carboxylic acids and derivatives	Sugars	380.014	339.996	[M-H+CH3CN]-	C6H14O12P2	A	9	9	9	9	9	9029.5	9	9	9	173220	65220	66659	82534	134870	98103	109280	136900	82192	335290	258400	420150	305350	337210	102090	9	9	9	9	9	9	9	9	9	9	9	9	9	9	9	9	9
MWC10139037	Aminoimidazole ribotide;AIR;1-(5'-Phosphoribosyl)-5-aminoimidazole;5'-Phosphoribosyl-5-aminoimidazole;1-(5-Phospho-D-ribosyl)-5-aminoimidazole;5-Amino-1-(5-phospho-D-ribosyl)imidazole	Carboxylic acids and derivatives	Sugars	296.066	295.057	[M+H]+	C8H14N3O7P	A	142040	262200	321280	215570	259810	501010	555850	486010	563340	726650	1334500	549520	563730	609120	994880	824250	841620	592380	1066500	1792500	632650	1558500	745250	596100	655240	930560	751820	606850	852950	1117900	3099800	3985700	4351300	2163400	4949500	2802400	2375400	2218500	2750600	1452500	1609300
MWC10009240	cis-beta-D-Glucosyl-2-hydroxycinnamate	Carboxylic acids and derivatives	Sugars	373.112	326.1	[M+H+HCOOH]+	C15H18O8	B	9	9	9	9	9	9	9	9	9	9	9	9	8845500	610020	539080	153120	11305000	4689100	9	9	9	9	9	499220	9	9	9	9	9	9	9	9	9	9	9	9	9	9	9	9	9
MWC10152917	D-Arabinonic acid	Carboxylic acids and derivatives	Sugars	165.041	166.048	[M-H]-	C5H10O6	B	10841	8043.9	24358	11170	17887	15567	127780	75548	150500	89404	167190	117430	18690	26084	14858	27440	31455	19729	8738.9	12352	16785	14151	5918	27430	28280	28870	17428	26686	24792	18693	25978	38171	26689	25341	29593	31426	23922	29799	24719	21511	22953
MWC10009890	D-Fructose 2,6-bisphosphate	Carboxylic acids and derivatives	Sugars	424.958	339.996	[M+K+HCOOH]+	C6H14O12P2	B	168700	72746	130830	147780	177500	66847	9	9	9	9	9	9	438120	587820	346950	465540	297420	401620	126320	216620	120690	191950	234820	599300	9	9	9	9	9	9	9	9	9	9	9	9	112170	144170	150220	143450	211280
MWC10152163	D-Quinovose	Carboxylic acids and derivatives	Sugars	201.026	164.068	[M+K-2H]-	C6H12O5	B	738690	666490	606030	572480	670570	720110	965960	906300	880980	966190	944080	971990	1196800	1233600	1174600	1229800	1279000	1183900	1032500	1093400	1044500	1056500	1036200	1282600	742020	927460	833210	864130	788510	775060	1706400	1719700	1727900	1670100	1757200	1718100	1007800	1055800	1018700	988110	972130
MWC10138256	D-Tagatose;lyxo-Hexulose	Carboxylic acids and derivatives	Sugars	179.056	180.063	[M-H]-	C6H12O6	A	597900	891230	1135700	674540	725830	1101800	1117300	740510	1179900	1017800	881850	1042300	596280	474440	379650	428860	531190	480310	798070	645510	894190	887650	1005900	462250	9	9	9	9	9	9	187150	256130	321910	170030	458860	257220	846000	709890	793100	656420	732670
MWC10146447	Hydroxycitronellal	Carboxylic acids and derivatives	Sugars	214.177	172.146	[M+CH3CN+H]+	C10H20O2	B	796990	756990	627780	673490	671650	729450	760210	845000	801670	762030	733190	602810	734580	689840	639930	869440	660100	720240	876420	780460	731550	735490	808570	743490	860800	747360	839080	705970	665200	785920	667290	622350	669930	666020	629600	754580	769730	751530	922780	985080	736000
MWC10009999	Isomaltose;Brachiose	Carboxylic acids and derivatives	Sugars	377.084	342.116	[M+Cl]-	C12H22O11	A	911300	475240	706010	657960	635730	830170	59786	51096	33571	41882	42687	51673	2452700	2734000	2930800	2862200	2649300	2525700	776990	1596600	1098900	1146000	1301600	2704900	28959	29333	46241	22707	55440	32619	21772000	18481000	15828000	20294000	15524000	14001000	983520	1253200	1378000	1139600	1038800
MWC10152871	L-(+)-Gulose	Carboxylic acids and derivatives	Sugars	203.053	180.063	[M+Na]+	C6H12O6	A	420580	448430	466900	391420	569450	543380	2225500	1898200	3362900	1145100	1690300	2271400	760200	743350	672000	1091400	954500	579050	647970	650300	782800	710640	640540	788390	3781300	4706400	4111400	3662200	3333600	3848500	15937000	27826000	29024000	25103000	34871000	17920000	908030	894180	732270	603460	817400
MWC10153017	maltotetraose	Carboxylic acids and derivatives	Sugars	665.215	666.222	[M-H]-	C24H42O21	B	66877	140900	87067	72534	119740	58553	9	3117.6	2887.8	1593.1	876.12	836.66	11765	14608	16850	7143.2	10142	44107	24723	11985	30764	8658	18143	14193	17937	20531	25451	29848	34098	26528	10388	4545	13293	9531.9	9001.7	13792	58310	60162	95117	29390	30176
MWC10010019	Melibiose	Carboxylic acids and derivatives	Sugars	341.109	342.116	[M-H]-	C12H22O11	A	944470	640600	962690	833510	751660	1108500	537210	955420	474530	666680	728830	964350	3232500	4058900	4271300	3984100	4101800	3626000	4837500	3867700	4384500	3574000	4097300	4065100	9945200	7817000	9453900	9865100	8724500	10975000	84460000	71941000	61452000	83639000	51938000	51767000	1076200	1452100	1456000	1094900	1061500
MWC10138131	Methylglyoxal;Pyruvaldehyde;Pyruvic aldehyde;2-Ketopropionaldehyde;2-Oxopropanal	Carboxylic acids and derivatives	Sugars	124.014	72.0211	[M+Cl+NH3]-	C3H4O2	B	52071	32792	33178	46766	61372	47060	1551300	1568000	1406700	1838400	1504800	1720500	22170000	22640000	18525000	19659000	24785000	19364000	3009800	3660600	2680400	3068900	3288700	23496000	58762	60078	57872	48132	53134	55281	60584	64603	47060	60389	53304	56216	19824	16414	15209	18970	35863
MWC10150226	p-Hydroxybenzoic acid-O-glucoside	Carboxylic acids and derivatives	Sugars	299.077	300.085	[M-H]-	C13H16O8	A	9	9	9	9	9	9	9	9	9	9	9	9	9	9	9	9	9	9	75809	99113	110840	106340	81639	9	8907.5	66136	7216.5	9	28703	3569.4	9	9	9	9	9	9	9	9	9	9	9
MWC10150030	rhodioloside	Carboxylic acids and derivatives	Sugars	342.153	300.121	[M+CH3CN+H]+	C14H20O7	B	309850	543520	221790	577080	421210	379190	9	9	9	9	9	9	777450	1840900	396260	1149400	307990	445310	38862	27279	24544	44388	36416	1666100	9	19482	6370.6	9	9	9	15721	12916	16568	12046	8498.4	7874.2	9	9	9	9	9
MWC10006206	Sorbitol 6-phosphate	Carboxylic acids and derivatives	Sugars	261.039	262.045	[M-H]-	C6H15O9P	A	9	9	9	9	9	9	214860	377900	338920	323190	346970	293390	38268	63124	37527	71621	51572	23543	346950	157390	246390	234070	256310	63149	1380300	1575900	1696200	1180300	1204400	911580	1009600	1570300	883740	1198800	945010	897860	54072	100670	51772	29223	22780
MWC10153021	Trehalose-6-Phosphate	Carboxylic acids and derivatives	Sugars	423.089	422.083	[M+H]+	C12H23O14P	A	2038800	865880	1351200	1691200	1569900	751500	9	9	9	9	9	9	1944900	1363200	1704000	1514200	991200	1528000	9	56871	19232	25045	42465	1643500	9	9	9	9	9	9	9	9	9	9	9	9	1265500	1307200	2125100	1548400	2154500
MEDN0131	(R)-Lipoic Acid	CoEnzyme and vitamins	CoEnzyme and vitamins	205.036	206.044	[M-H]-	C8H14O2S2	A	9	9	9	9	9	9	9166	11902	47544	5047.6	29146	15967	9	9	9	9	9	9	9	9	9	9	9	9	9	9	9	9	9	9	1999.9	2430.8	2564.1	1689.4	3161.8	1688.1	9	9	9	9	9
MEDN0132	Biotin	CoEnzyme and vitamins	CoEnzyme and vitamins	243.08	244.088	[M-H]-	C10H16N2O3S	A	39724	46649	18621	27224	29900	38432	145600	170680	224830	151490	163570	159780	78032	37128	53916	63493	56123	37347	341150	258000	251670	302150	352410	44209	87959	136220	111420	120200	92427	52425	129210	106300	166950	141550	133440	138140	727490	768740	689350	590230	577840
MEDN0241	Vitamin D3	CoEnzyme and vitamins	CoEnzyme and vitamins	383.331	384.339	[M-H]-	C27H44O	A	37979	19391	32488	26396	28828	32751	14592	19481	25857	18775	25267	26699	27222	22614	27658	25479	28516	23699	24987	26343	27876	23322	25064	24592	29189	30137	34250	37135	37583	30989	19027	18935	29827	14439	25027	20234	44549	53373	49751	42242	43558
MEDN0243	Pyridoxine	CoEnzyme and vitamins	CoEnzyme and vitamins	168.066	169.074	[M-H]-	C8H11NO3	A	9	9	9	9	9	9	103030	133260	161730	158170	183380	229830	9	9	9	9	9	9	20078	24010	20808	13690	13851	9	9	9	9	9	9	9	9	9	9	9	9	9	9	9	9	9	9
MEDN0244	Orotic Acid	CoEnzyme and vitamins	CoEnzyme and vitamins	155.009	156.017	[M-H]-	C5H4N2O4	A	96781	94110	53867	25877	98341	88560	282890	395500	364130	321150	334840	379270	281470	353480	230210	237660	380170	835190	165660	243580	224970	251290	255990	403990	238040	124820	119800	155420	145410	134030	657420	778860	659240	630540	717830	691280	78928	111540	89073	168460	103430
MEDN0245	Pantothenate	CoEnzyme and vitamins	CoEnzyme and vitamins	218.103	219.1	[M-H]-	C9H17NO5	B	88111000	69714000	78407000	69047000	76575000	90200000	43584000	44730000	45045000	46207000	44214000	47296000	93256000	89512000	71011000	89066000	94604000	83197000	100880000	99261000	100130000	93646000	105700000	103920000	21028000	19247000	18478000	18577000	25264000	16290000	112940000	119260000	123500000	116840000	126320000	117160000	50314000	56002000	51063000	49941000	48591000
MEDN0449	4-Hydroxyretinoic Acid	CoEnzyme and vitamins	CoEnzyme and vitamins	315.196	316.204	[M-H]-	C20H28O3	B	9	9	9	9	9	9	9	9	9	9	9	9	9	9	9	9	9	9	9	9	9	9	9	9	9	9	9	9	9	9	9	9	9	9	9	9	9	9	9	9	9
MEDN1055	D-Calcium Pantothenate	CoEnzyme and vitamins	CoEnzyme and vitamins	437.214	438.221	[M-H]-	C18H34N2O10	A	2730600	1616200	2153700	1577800	1883500	2663200	1144400	1074300	1208500	1378700	1086800	1341900	4368100	2415600	1886300	2384000	3286800	1960700	3202100	3012400	3484300	3147200	3399300	3045600	267820	226730	599850	307540	442250	227820	4417000	4579200	5308900	4933600	5979800	5058300	945650	898600	818880	908310	743850
MEDP0242	Nicotinamide	CoEnzyme and vitamins	CoEnzyme and vitamins	123.1	122.1	[M+H]+	C6H6N2O	B	4928100	3491300	4005800	3564000	3555800	5445000	25893000	24364000	21210000	24876000	26843000	26660000	10500000	10494000	10056000	13921000	12380000	10296000	10346000	9893700	11614000	11807000	10490000	10542000	14757000	20861000	19856000	15558000	21346000	17158000	19789000	15585000	25440000	19081000	21354000	19215000	20157000	22854000	26542000	18997000	14492000
MEDP0243	4-Oxoretinol	CoEnzyme and vitamins	CoEnzyme and vitamins	301.2	300.209	[M+H]+	C20H28O2	A	9	9	9	9	9	9	26275	15995	15678	20684	19526	23722	9	9	9	9	9	9	9	9	9	9	9	9	16252	7882.8	16860	17246	7313.4	11958	9	9	9	9	9	9	9	9	9	9	9
MEDP0244	All-Trans-13,14-Dihydroretinol	CoEnzyme and vitamins	CoEnzyme and vitamins	287.2	286.23	[M+H]+	C20H32O	B	9	9	9	9	9	9	1947700	1835400	1867900	1137800	1708500	1285000	9	9	9	9	9	9	9	9	9	9	9	9	641450	678540	643170	602910	720620	518630	9	9	9	9	9	9	9	9	9	9	9
MEDP0246	Nicotinic Acid	CoEnzyme and vitamins	CoEnzyme and vitamins	124	123.032	[M+H]+	C6H5NO2	A	300090	490400	205090	259610	245350	191950	3441500	5085000	4896800	3067600	3317900	3919000	244790	121050	106220	112810	157720	146140	665170	680860	705420	999250	985300	110510	5046700	2867600	3983800	5636900	3287500	3145100	416890	932570	515260	422640	942810	625920	417320	726080	787550	428860	488910
MEDP0247	Nicotinuric Acid	CoEnzyme and vitamins	CoEnzyme and vitamins	181.1	180.054	[M+H]+	C8H8N2O3	B	5509800	2954700	4304100	14945000	12140000	7316600	9473000	26623000	12267000	7406700	8551000	9157800	9	9	9	9	9	9	4601800	4851700	5074900	6654000	7237300	9	9	9	9	9	9	9	9	9	9	9	9	9	899700	463470	1272400	1101100	698090
MEDP0249	Pantothenol	CoEnzyme and vitamins	CoEnzyme and vitamins	206.13	205.131	[M+H]+	C9H19NO4	A	19220	18022	4581.9	5661.6	15481	22988	7571.6	10673	14013	13030	3136.2	7167.9	4337.3	3858.4	11104	8572	14426	9671.4	22912	21084	4492.7	11453	24460	6154.1	33118	15868	6258	11580	8378.1	13989	40488	22697	26296	28960	33699	19694	8523.6	13903	3643.8	3352.8	3378.5
MEDP0250	Riboflavin	CoEnzyme and vitamins	CoEnzyme and vitamins	377	376.138	[M+H]+	C17H20N4O6	A	196340000	158570000	151790000	148470000	164960000	184210000	13682000	11696000	15135000	13644000	12832000	14443000	18231000	20007000	17755000	17756000	18888000	27890000	85049000	59157000	38049000	48387000	43447000	20758000	27731000	24675000	21535000	22428000	20833000	15045000	3223100	3652500	4010300	2672400	3573000	3313500	4229100	5232400	4714100	6255800	5001700
MEDP0251	Trigonelline	CoEnzyme and vitamins	CoEnzyme and vitamins	138	137.048	[M+H]+	C7H7NO2	A	438090	285960	236380	353590	387290	508180	1852600	1482900	2475000	1804000	2123400	1299600	6934900	6923800	5933400	5842000	6897600	6003000	343450	342360	524050	292760	543330	6508200	6291200	2894600	7674200	4649500	4228700	4376900	3800700	2079400	3190900	2711600	3244600	2430100	1021600	1398500	1864100	1005100	743540
MEDP0356	Methyl Nicotinate	CoEnzyme and vitamins	CoEnzyme and vitamins	138.05	137.048	[M+H]+	C7H7NO2	B	9	9	9	9	9	9	9	9	9	9	9	9	9	9	9	9	9	9	9	9	9	9	9	9	9	9	9	9	9	9	147820	170420	175940	166000	145090	189370	9	9	9	9	9
MEDP0389	Pantetheine	CoEnzyme and vitamins	CoEnzyme and vitamins	279.13	278.13	[M+H]+	C11H22N2O4S	B	20773000	20440000	20774000	19144000	19103000	20690000	16476000	16325000	16940000	22401000	18523000	16938000	23266000	24230000	22922000	21599000	23736000	23474000	23841000	19635000	22740000	21796000	21933000	24005000	32735000	32249000	30281000	32006000	25797000	29575000	11929000	10343000	11016000	10923000	11313000	12385000	26049000	25034000	26757000	22509000	20989000
MEDP0393	Pyridoxine 5'-Phosphate	CoEnzyme and vitamins	CoEnzyme and vitamins	250	249.04	[M+H]+	C8H12NO6P	B	30421	21266	21728	37388	30643	27974	88536	102430	62401	62171	68031	57183	59748	123920	51425	61035	96048	93533	89617	77279	125160	216480	123330	66973	9	9	9	9	9	9	24436	26004	27831	4169.8	20736	19709	182810	241180	125160	95597	173380
MEDP0514	Thiamine	CoEnzyme and vitamins	CoEnzyme and vitamins	265.111	265.112	[M]+	C12H17N4OS+	B	2236000	2495000	2882500	1632900	1836100	3013000	499290	656060	886610	444620	522290	593300	86266	157780	153640	200450	177620	164200	378890	433200	367200	345260	385690	148480	916120	583310	825710	1159800	604700	694180	927940	1191500	1321100	1087100	1210700	1186400	240770	512940	375560	306870	368650
MEDP0895	Dethiobiotin	CoEnzyme and vitamins	CoEnzyme and vitamins	215.3	214.132	[M+H]+	C10H18N2O3	A	9	9	9	9	9	9	141360	94918	268190	100700	119790	212310	27236	37283	16749	35316	28845	31291	26724	25347	11448	16411	16713	25735	9	9	9	9	9	9	21906	20729	20121	32415	23407	23942	150420	197530	253760	63043	85503
MEDP1481	Menadiol Diacetate	CoEnzyme and vitamins	CoEnzyme and vitamins	259	258.27	[M+H]+	C15H14O4	B	41741	31450	35041	35798	41225	28518	12637	27627	26012	28071	15992	34460	39699	50674	37198	43474	35203	34809	30980	31896	47117	30670	41609	42045	44672	41813	39529	37011	24440	44657	21241	30511	35516	33795	28699	34537	41927	51387	66253	49263	46147
MEDP1499	All trans-Retinal	CoEnzyme and vitamins	CoEnzyme and vitamins	285	284.214	[M+H]+	C20H28O	B	7186.8	10319	9	9	9	6346.8	68879	24454	57524	47431	47265	47301	18539	23305	31015	29809	37298	23841	7152.6	6539.7	7744.2	7545.6	4177.8	28504	33666	52381	54780	31463	15836	45198	25965	39402	38654	32597	45536	43495	9	9	9	9	9
MWC10153163	Dehydroascorbic acid	CoEnzyme and vitamins	CoEnzyme and vitamins	173.009	174.016	[M-H]-	C6H6O6	B	9845000	10646000	12026000	10024000	9032500	12209000	54741000	45533000	56761000	50423000	53185000	46738000	9072600	5306800	2677600	5367700	5688800	5398400	20065000	18149000	19021000	15033000	19157000	5229700	25053000	38410000	29421000	23862000	30055000	26628000	11668000	11718000	11226000	12566000	12084000	13253000	7396200	5814300	5179000	5161200	4180700
MWC10013529	3-Hydroxy-vitamin K;3-Hydroxy-2-methyl-3-phytyl-2,3-dihydronaphthoquinone;3-Hydroxy-2-methyl-3-phytyl-2,3-dihydro-1,4-naphthoquinone	CoEnzyme and vitamins	CoEnzyme and vitamins	491.358	468.36	[M+Na]+	C31H48O3	B	30490	40789	31141	36038	45924	47795	52144	48381	44209	37386	42431	34582	94235	90929	49565	40740	55960	92994	19064	24846	24160	18945	19714	113560	134820	82404	295550	132440	103540	67170	8681900	857540	9344600	2558000	1393300	1279500	127680	53470	151400	72745	84248
MWC10139513	Vitamin K1 epoxide;(2,3-Epoxyphytyl)menaquinone;2,3-Epoxy-2,3-dihydro-2-methyl-3-phytyl-1,4-naphthoquinone;2,3-Epoxyphylloquinone;1a,7a-Dihydro-1a-methyl-7a-(3,7,11,15-tetramethyl-2-hexadecenyl)-naphth[2,3-b]oxirene-2,7-dione;Phylloquinone oxide;Phylloquinone epoxide;Phylloquinone-2,3-epoxide;Vitamin K1 2,3-epoxide;Vitamin K1 oxide	CoEnzyme and vitamins	CoEnzyme and vitamins	533.293	466.345	[M-2H+3Na]+	C31H46O3	B	164490	78843	155230	107340	168420	243830	835600	616700	457780	543350	492610	613000	26009	167930	259150	290380	217020	257070	107570	99529	140290	93198	158910	204540	579460	644620	689680	561960	663710	618590	1130200	1246600	1112700	1193200	1228500	1200900	9	9	9	9	9
MWC10005948	Nicotinate D-ribonucleoside	CoEnzyme and vitamins	CoEnzyme and vitamins	291.05	256.082	[M+Cl]-	C11H14NO6	A	31588	38813	32003	36975	29336	26886	9	9	9	9	9	9	9	9	9	9	9	9	24829	22124	26386	15295	12592	9	9	9	9	9	9	9	9	9	9	9	9	9	9	9	9	9	9
MEDN0378	γ-Linolenic Acid(C18:3N6)	FA	FFA	277.217	278.22	[M-H]-	C18H30O2	A	88790	143870	113780	91388	164990	279960	1521700	1583200	1233600	1072500	1428400	1294900	98709	140540	176290	191990	179880	209120	28038	32359	30593	36691	19931	146810	330640	485470	377420	389040	357530	399600	1029400	1222800	1080700	1210900	1068400	869400	121290	97534	91380	71852	93746
MEDN0380	Palmitoleic Acid(C16:1)	FA	FFA	253.217	254.2	[M-H]-	C16H30O2	A	6622000	9809100	8439500	6609200	9912700	18352000	33961000	33228000	30617000	31585000	31665000	36367000	1727300	1793100	2105100	2117000	1924400	2739000	2147000	2081900	1951300	2197900	1855900	2242200	26381000	36642000	29855000	33016000	31513000	30964000	30448000	33690000	31499000	32630000	31130000	27306000	7715600	4653300	5328100	5888400	6674800
MEDN0381	Hexadecanoic Acid(C16:0)	FA	FFA	255.232	256.24	[M-H]-	C16H32O2	A	5166500	5353000	5742000	5624500	4970400	6084900	4846000	5250400	5595100	5180700	4606300	5172700	2527800	3143200	2890600	3907800	3617000	3333000	3825300	3760400	3666700	3710000	3312500	3840400	7455600	9139400	9358700	9435400	8873500	8645400	5014700	5247000	5303300	5144200	4445500	4165000	2772900	2758500	2679500	3458000	3578300
MEDN0383	Linoleic Acid(C18:2N6C)	FA	FFA	279.232	280.24	[M-H]-	C18H32O2	A	7918200	8241700	8778700	8495200	9227500	10235000	17208000	15906000	18996000	16505000	18567000	15460000	2562600	3993700	4975200	4329000	4498800	4303500	7554500	8916700	6759500	7139400	5815900	4949100	12952000	14159000	12783000	13915000	13515000	12992000	6216400	5858500	6226600	7323300	5690100	5835800	6611100	6340300	6167200	6969200	7275400
MEDN0385	Dodecanoic Acid(C12:0)	FA	FFA	199.17	200.17	[M-H]-	C12H24O2	A	1454900	1805700	1348500	1160500	1431500	2375200	16047000	12964000	8932000	7301800	9020700	70199000	2175200	1551700	1421400	1282300	1223800	1474200	1386900	1091700	1049000	1021900	1316800	2060500	2360800	3703300	2799300	2741100	2620000	2425000	1424700	1460200	1268600	1160600	1303400	1360900	2749100	1841500	1484300	1865000	1624000
MEDN0387	Hendecanoic Acid/Undecanoic Acid(C11:0)	FA	FFA	185.154	186.16	[M-H]-	C11H22O2	A	9	9	9	9	9	9	2850	2717.5	2333.8	4033	5309.7	3920.8	3332.2	5397.3	4519.1	5535.2	9	9	2978.1	9	1741.8	2161.2	4091	7621.2	2174.1	2016.2	2563.4	4324.3	9	1742.4	9	9	9	1190.8	1638.5	9	9	9	9	9	9
MEDN0388	Elaidic Acid(C18:1N9T)	FA	FFA	281.248	282.25	[M-H]-	C18H34O2	A	7177.7	7130.3	7660.3	7618.1	9304.4	12963	7995.5	10155	9595.6	8091.6	7969.8	8563.4	2162.4	3127.5	3346.3	3502.8	3851.2	4947.2	5729.1	5242	4530.6	5095.6	4140.1	4439.9	10753	10101	11973	12559	12249	10803	35127	34150	29243	39661	32233	27554	6005	4361.7	4690.8	5312.3	5175.9
MEDN0394	Cis-11,14-Eicosadienoic Acid(C20:2)	FA	FFA	307.264	308.27	[M-H]-	C20H36O2	A	9	9	9	9	9	9	4856.9	2762.6	4921.1	3948.2	4018.9	5781.7	9	9	9	9	9	9	9	9	9	9	9	9	9	9	9	9	9	9	9	9	9	9	9	9	9	9	9	9	9
MEDN0395	Cis-11,14,17-Eicosatrienoic Acid(C20:3)	FA	FFA	305.248	306.25	[M-H]-	C20H34O2	A	689980	874140	675980	714520	691930	871390	401540	596780	455770	503310	484130	497290	891690	661120	725340	618410	864180	806910	609270	608590	617670	881860	777000	742070	482440	422740	544300	539260	432660	475340	776780	707470	748870	538360	744520	620640	833390	812110	756290	884600	863120
MEDN0396	Capric Acid(C10:0)	FA	FFA	171.139	172.15	[M-H]-	C10H20O2	A	3506.1	3947.4	4701.5	4333.3	3858.7	4629.5	2431.4	2987	1846.8	4666.3	2860.5	22142	8991.5	6512.4	4291.6	3992.6	5181.1	5080.3	6865.3	4089.4	4755.4	5393.6	4021.7	8824.8	3009.4	2734.5	2643.9	4677.1	3077.3	2420.5	5652.4	4851.7	6037.7	3759.6	5110.7	6681.2	5412.9	5344.4	5574.6	5896.4	6123.8
MEDN0399	Arachidic Acid(C20:0)	FA	FFA	311.295	312.3	[M-H]-	C20H40O2	A	299050	432540	582580	339850	511800	968650	417500	237210	605540	352660	547810	374330	27800	17494	11139	14535	14228	18194	282980	972080	641110	435260	377380	20807	9	9	9	9	9	9	9714.8	18631	19614	20922	14390	11145	107470	44931	37975	67630	35476
MEDN0400	Α-Linolenic Acid(C18:3N3)	FA	FFA	277.217	278.22	[M-H]-	C18H30O2	A	88790	143870	113780	91388	164990	279960	1521700	1583200	1233600	1072500	1428400	1294900	98709	140540	176290	191990	179880	209120	28038	32359	30593	36691	19931	146810	330640	485470	377420	389040	357530	399600	1029400	1222800	1080700	1210900	1068400	869400	121290	97534	91380	71852	93746
MEDN0494	8,15-Dihete	FA	FFA	335.222	336.23	[M-H]-	C20H32O4	A	1022700	1356400	1195800	1094500	1322200	2094600	1314100	1427700	1322200	1476700	1329800	1487000	267990	268990	355210	342530	311740	466350	341480	345810	318640	368350	327550	408650	1752500	1537100	1792800	1810200	1642200	1685000	1959400	2201800	2235900	2080600	2078800	1943600	1043900	524220	676120	739880	779840
MEDN0563	DL-Benzylsuccinic acid	FA	FFA	207.066	208.074	[M-H]-	C11H12O4	B	102050	33361	30362	38824	68512	60913	67380	50519	39453	40483	25250	11521	33472	30214	9	43545	48521	58656	37905	35418	54615	19866	24815	27047	53849	59150	34365	64168	44668	43010	50432	63305	101380	69454	42522	45302	10345	20167	24077	8945.6	13608
MEDN0604	Tetradecanedioic acid	FA	FFA	257.175	258.183	[M-H]-	C14H26O4	A	756060	705640	616400	501220	666070	803080	318160	313350	278030	264020	278050	322350	176160	119930	103990	104040	141370	130100	169380	174240	164750	151040	164870	117400	104390	122840	115730	114200	119560	119560	3203300	2928900	4344700	4340500	3434600	3996900	199420	114760	132740	113710	136350
MEDN0658	Hexadecanedioic acid	FA	FFA	285.207	286.214	[M-H]-	C16H30O4	A	308470	518690	280720	204700	329770	315380	852980	793630	1254900	1398800	1145700	1090500	165780	99902	84938	91913	101570	106410	1057600	2870000	2004000	1410000	1531500	118410	80760	65861	69134	75318	71161	67575	134530	172090	143120	119480	129500	137020	206980	149080	126680	157100	128550
MEDN0732	Ricinoleic acid	FA	FFA	297.243	298.251	[M-H]-	C18H34O3	A	279520	288560	298720	281120	320860	306480	241070	258580	273700	284230	307920	307620	234860	238960	232950	230900	226210	232270	290770	275780	282040	276580	305720	272000	273500	272560	247930	267590	254580	264340	223150	212490	224630	218630	213790	234410	237130	244120	232370	237560	222950
MEDN0807	Myristic acid	FA	FFA	227.201	228.37	[M-H]-	C14H28O2	A	7584.7	11947	10293	8199.1	9137.3	18019	16717	16264	15415	12295	13690	18895	3230.8	3985.1	4731.8	2646.2	3497.6	6937.2	3075.9	2490.3	3801.8	4125.4	4402.4	4399.6	8337.9	12787	10702	10365	8781.5	8827.5	6318.3	7042.2	5845	7443.1	7549.7	5764.4	8061.3	8260.8	6640.7	10205	7394.1
MEDN1069	9,12-octadecadienoic acid	FA	FFA	275.201	276.209	[M-H]-	C18H28O2	B	32767	84184	55036	40333	71166	150860	2672100	3854500	2403900	1776000	2660200	2739700	9	9	9	9	9	9	188380	164620	182210	257380	165320	9	9	9	9	9	9	9	126720	178880	139730	191930	154480	109880	9	9	9	9	9
MEDN1078	Cis-9,10-epoxystearic acid	FA	FFA	297.243	298.251	[M-H]-	C18H34O3	A	208170	191720	430070	115030	259770	745140	125520	159950	172220	127490	111480	226860	33330	24312	262060	15090	21526	115610	87691	45286	36474	46215	62493	33077	117400	189790	164080	140220	143820	152940	8775.1	18629	15984	13601	16520	14527	16163	13384	11178	7870	12574
MEDN1111	12-Hydroxydodecanoic acid	FA	FFA	215.165	216.173	[M-H]-	C12H24O3	A	21116	13883	16693	15751	21377	19311	30908	35752	21823	22558	21255	79722	13492	14712	18177	10214	15229	10439	9877.7	13722	13940	16002	9060.2	12385	13845	12486	9980.3	12211	10666	11291	656500	458580	1155100	1003600	755530	787120	17537	17542	14321	10559	13689
MEDN1112	16-Hydroxyhexadecanoic acid	FA	FFA	271.227	272.235	[M-H]-	C16H32O3	B	190350	193780	325100	133520	270530	351700	163660	162840	265300	158480	149010	218090	88659	117060	159560	111560	103780	109500	157110	130480	162480	217370	162040	130840	1071900	1655900	1233700	1233500	1156500	1291400	63169	58973	59676	67800	38544	59463	67440	58526	66084	69235	44859
MEDN1156	8,11-icosadienoic acid	FA	FFA	303.2	304.24	[M-H]-	C20H32O2	A	5196.5	15204	9351.2	7630.5	8776.7	7829.2	184880	169000	176100	132500	176210	168190	9	9	9	9	9	9	13675	13764	10424	12315	10451	9	7342.7	8348.8	7276.7	9907.7	7680.9	7136.7	494.27	6842.5	1317.5	739.6	442.46	1310	9	9	9	9	9
MEDN1295	15-methyl palmitic acid	FA	FFA	269.248	270.256	[M-H]-	C17H34O2	B	9	9	78454	9	62026	90775	9	9	9	9	9	9	9	9	9	9	9	9	9	9	9	9	9	9	683040	1066000	734520	1346800	549570	678640	9	9	9	9	9	9	9	9	9	9	9
MEDP0308	Dodecanedioic Aicd	FA	FFA	231.152	230.152	[M+H]+	C12H22O4	A	32092	35395	35421	34282	34161	28104	49078	72403	50294	49071	57168	89290	27701	18721	13596	15160	19669	12826	21184	19419	21020	22581	19284	24329	18502	21881	28024	31705	19163	22333	1197900	1015900	1929400	1786300	1433000	1414200	50301	28649	28661	17136	24770
MEDP0429	Punicic Acid	FA	FFA	279.3	278.225	[M+H]+	C18H30O2	A	2586800	3136600	1967200	1729300	3370600	2192200	5048200	4606800	7172600	7463500	6877200	7369700	961590	848470	1498300	1032600	1239900	1275600	1437300	2010700	1461300	1522100	1364800	1020800	1409400	1791400	1470300	2029100	1276400	1170900	151260	233400	221480	132210	140240	144490	5381500	5706200	5017100	2997300	4224100
MEDP0510	Acetyl-L-carnitine	FA	CAR	204.122	203.116	[M+H]+	C9H17NO4	B	163040000	199010000	167870000	162620000	167910000	136510000	212700000	164300000	204970000	216550000	207610000	211220000	303340000	252140000	210760000	261250000	265740000	258480000	484660000	566070000	457720000	564100000	555640000	268690000	7424600	11186000	11322000	7060500	8405200	10500000	1715600	1875700	1950900	1871900	3293300	1952800	27954000	28448000	27814000	32143000	31402000
MEDP0523	DL-Carnitine	FA	CAR	162.112	161.105	[M+H]+	C7H15NO3	B	20006000	19184000	12729000	18128000	14218000	22935000	170410000	163590000	166860000	169350000	153400000	152690000	43485000	45678000	49747000	49801000	53073000	34614000	265130000	229750000	261340000	249350000	235300000	40328000	3277600	3004500	4979100	4116000	2812000	2836300	4138400	4562400	3703700	4241700	3940000	3690300	2630000	2854600	2683100	3475400	1797900
MEDP0577	Isobutyryl carnitine	FA	CAR	232.147	231.147	[M+H]+	C11H21NO4	A	23050000	35096000	18173000	24846000	21455000	26071000	117960000	74591000	99911000	83126000	85088000	69250000	15990000	24830000	7666700	20407000	21867000	17223000	68492000	72458000	78237000	73622000	73291000	26329000	295210	264210	465590	296300	304180	344610	55414	122080	54659	40097	70496	31559	9162800	8812800	7601700	6673500	5523700
MEDP0585	Stearidonic Acid	FA	FFA	277.209	276.209	[M+H]+	C18H28O2	A	27147	77817	67487	32211	72310	114780	1633100	1951300	1196700	942690	1517200	1392200	9	9	9	9	9	9	164060	194870	169430	242920	192270	9	9	9	9	9	9	9	105010	149040	119910	156930	133390	109340	9	9	9	9	9
MEDP0618	2-Methylbutyroylcarnitine	FA	CAR	246.163	245.163	[M+H]+	C12H23NO4	B	640110	943250	1062100	1612500	918360	855320	71490000	48463000	68564000	63649000	84273000	50741000	13961000	27102000	16904000	11688000	16515000	12721000	3589200	2154700	2725200	2727300	3048200	28513000	248090	258780	489600	235370	118050	243700	22241	126790	104230	34053	25979	18261	4157800	810360	1553100	1443100	842470
MEDP0634	cis-gondoic acid	FA	FFA	311.287	310.287	[M+H]+	C20H38O2	B	9	9	9	9	9	9	9	9	9	9	9	9	9	9	9	9	9	9	9	9	9	9	9	9	9	9	9	9	9	9	9	9	9	9	9	9	9	9	9	9	9
MEDP0783	10-Undecenoic acid	FA	FFA	185	184.146	[M+H]+	C11H20O2	B	22455	39244	33493	26287	40257	60286	13776	27220	17707	21404	14827	21485	62170	78547	72276	71682	71803	57581	16092	33283	30714	40742	36713	44950	26075	30008	27729	39705	48393	26555	9	9	9	9	9	9	9	9	9	9	9
MEDP1084	Dodecylcarnitine	FA	CAR	344.271	343.272	[M+H]+	C19H37NO4	A	1286500	2144200	614010	833530	758990	841180	8203800	4074400	6902500	2799600	4550200	8734500	3672400	1022400	285290	887720	1041700	1033300	890180	986560	852080	1015700	906400	1060200	70328	35839	83426	27473	41871	25300	115160	104650	94653	102250	108150	126290	460120	399350	265390	488060	319980
MEDP1102	Decanoyl L-Carnitine	FA	CAR	316.238	315.241	[M+H]+	C17H33NO4	A	2423400	3847100	1053300	1656700	1314700	1559600	8117500	5664600	12658000	4335300	3776600	6665300	4779700	2478300	753430	2086600	2344700	1956400	451600	382620	254140	326480	393870	2593200	9	9	9	9	9	9	463510	279680	362860	364070	372620	361450	1177700	618030	393770	434560	265630
MEDP1179	(±) -Myristylcarnitine	FA	CAR	372.312	371.304	[M+H]+	C21H41NO4	A	11485000	23779000	6832100	8287800	7200100	7798300	54412000	37689000	58790000	28997000	41244000	33181000	33980000	9148100	2805600	7810400	9407900	11619000	6504100	8421600	7185000	9373500	9410300	10930000	651400	672720	1010500	990280	672780	413410	1133300	873450	792240	935360	995660	1008700	4494100	2859000	2926200	5796300	4236100
MEDP1289	Hexanoylcarnitine	FA	CAR	260.186	259.178	[M+H]+	C13H25NO4	A	5019600	8387300	1933000	2289200	2347100	3063000	13506000	6149400	18980000	9209200	5547600	8314600	9750500	13404000	3617800	8478300	8207000	10268000	284220	242330	296530	306050	327690	14345000	9	9	9	9	9	9	163100	110350	93032	129880	117170	143180	2183600	1279600	1094100	719350	524220
MEDP1372	Carnitine C22:0	FA	CAR	484.436	484.436	[M+H]+	C29H57NO4	B	9	9	9	9	9	9	120170	139380	137960	145910	112190	178180	547580	444740	311210	496050	681270	512910	9	9	9	9	9	9	9	9	9	9	9	9	50040	65522	48418	68130	62286	38368	9	9	9	9	9
MEDP1373	Carnitine C22:2	FA	CAR	480.405	480.405	[M+H]+	C29H53NO4	B	2748800	2074100	2790500	2420800	2917100	3735400	9425500	8872000	8898400	8160400	7680400	8699000	440580	567740	787650	721920	734650	773180	1857500	1749500	2189500	1604300	2374900	672640	6146500	8323100	7843800	6451000	6966100	6360600	11827000	12047000	12098000	12317000	12073000	11416000	954750	923250	970330	905880	1104300
MEDP1375	Carnitine C20-OH	FA	CAR	472.3	472.342	[M+H]+	C27H53NO5	B	19712	35039	15415	20341	21713	12828	108270	63312	87475	145120	94306	107170	125920	117820	67906	86364	90778	76473	124700	154090	153800	157960	126490	127270	11602	6763.8	12497	6773.9	9156.8	7661.3	9	9	9	9	9	9	33077	16617	20638	20447	11906
MEDP1380	Carnitine C20:1	FA	CAR	454.389	454.389	[M+H]+	C27H51NO4	B	540780	1087500	503960	786960	994590	1047100	6739600	5256700	5858200	2378900	4330200	3611200	529320	336370	224520	308270	351730	422160	155170	223760	203270	217860	217150	350030	28400	34327	49213	31032	36514	17744	123610	101590	94104	91281	95333	92481	697740	575690	616140	649410	571530
MEDP1381	Carnitine C20:2	FA	CAR	452.4	452.373	[M+H]+	C27H49NO4	B	88027	140240	85212	92308	87194	82084	758320	353950	1482700	513270	594290	821350	151170	62470	48185	56450	94440	68948	1149100	1063300	1193200	2041000	1394400	82753	9	9	9	9	9	9	9	9	9	9	9	9	264750	157170	216690	226710	200930
MEDP1382	Carnitine ph-C14	FA	CAR	448.342	448.342	[M+H]+	C27H45NO4	B	52506	138610	67325	50908	38518	25470	3321800	2535200	4251500	3084000	2529100	2544600	9	9	9	9	9	9	278670	293820	172600	325380	291530	9	9	9	9	9	9	9	9	9	9	9	9	9	9	9	9	9	9
MEDP1384	Carnitine C19:0	FA	CAR	442.389	442.389	[M+H]+	C26H51NO4	B	205880	283780	129230	253570	211850	193220	853150	603650	798700	664190	786990	715610	616640	617560	393830	664710	644390	613210	489760	635300	619600	750230	701580	576040	9	9	9	9	9	9	9	9	9	9	9	9	333130	254150	231650	288770	204210
MEDP1385	Carnitine C17:1:DC	FA	CAR	442.4	442.353	[M+H]+	C24H43NO6	B	1514500	3478000	629540	910560	829380	601560	15701000	5776100	11533000	8171000	7696700	6718600	5623500	2359100	919220	1729500	1821500	2888300	2125400	2701900	2387400	3239600	3749400	3025300	143870	147410	242090	275610	113850	133890	249530	244910	165110	275100	321180	257180	134210	92017	167390	207550	153520
MEDP1386	Carnitine C18:2-OH	FA	CAR	440.337	440.337	[M+H]+	C25H45NO5	B	1083800	1968600	175520	284450	286710	311980	11589000	6146800	10654000	7213900	10848000	9548400	5554800	2143600	841550	1517500	1540900	2492800	1383500	1674400	1441500	1940500	2726100	2676500	43217	27905	74717	78082	18404	27652	9	9	9	9	9	9	147420	135620	175110	209200	170280
MEDP1387	Carnitine C19:2	FA	CAR	438.358	438.358	[M+H]+	C26H47NO4	B	9	9	9	9	9	9	500780	441020	608530	360240	670140	383050	45132	9552.5	9	8379.4	15211	27444	91554	71907	79848	87751	109970	9	9	9	9	9	9	9	9	9	9	9	9	9	43608	25846	17289	68312	49198
MEDP1389	Carnitine C18:0	FA	CAR	428.337	428.337	[M+H]+	C25H49NO4	B	17560000	32957000	10325000	12447000	13286000	12399000	26449000	13970000	25243000	19701000	22512000	21174000	69387000	39134000	26228000	41883000	52522000	55108000	11632000	13119000	11812000	16327000	13121000	39617000	2641800	1890500	3189800	3329500	2286700	1761500	3682800	2623300	2606000	2723800	3266400	3190700	12908000	9658400	10424000	13403000	10484000
MEDP1391	Carnitine C18:2	FA	CAR	424.342	424.342	[M+H]+	C25H45NO4	A	13799000	27089000	14288000	13242000	10978000	13335000	127650000	125670000	187820000	146330000	177560000	135290000	78748000	15208000	4391600	13736000	18230000	30437000	20252000	26167000	22218000	26658000	26045000	16563000	1529800	1227100	1718200	1318100	881040	584610	338550	408280	362340	229970	287900	318000	10765000	5431100	8371200	15604000	9662900
MEDP1392	Carnitine C18:3	FA	CAR	422.327	422.327	[M+H]+	C25H43NO4	B	549870	1382200	1162100	737060	496020	839260	66317000	91866000	87777000	39316000	88139000	64183000	38443000	7087100	1474700	8471100	10564000	19393000	281040	467700	369070	361390	486190	8233900	117840	56142	104970	51575	52799	47268	1077300	1499100	805980	1080800	1349400	1413900	443490	264290	423630	481490	483200
MEDP1393	Carnitine C18:4	FA	CAR	420.311	420.311	[M+H]+	C25H41NO4	B	9	9	9	9	9	9	2272800	1951800	2839000	1039600	2148400	1463200	324980	88201	48008	96558	68642	116550	9	9	9	9	9	9	9	9	9	9	9	9	9	9	9	9	9	9	9	9	9	9	9
MEDP1394	Carnitine C15:DC	FA	CAR	416.339	416.339	[M+H]+	C22H41NO6	B	2576100	5261500	656360	947700	1051000	739940	12743000	2811500	7797800	6354500	4077300	4856700	6243800	3033400	1079400	2444000	2072400	2759300	2477800	3058100	2752600	3800600	4629100	3810900	134770	124630	225660	210710	125590	128700	200170	183780	157880	199110	230320	195180	148160	171630	188800	231360	194350
MEDP1395	Carnitine C17:0	FA	CAR	414.358	414.358	[M+H]+	C24H47NO4	B	134900	305940	374050	636150	376540	507410	9	9	9	9	9	9	9	9	9	9	9	9	1861100	1822000	1810800	1835700	1796200	9	9	9	9	9	9	9	9	9	9	9	9	9	118240	85324	105090	100780	76947
MEDP1396	Carnitine C15:1:DC	FA	CAR	414.4	414.358	[M+H]+	C22H39NO6	B	27539	35911	20191	15721	15523	14507	136610	28355	51821	42191	105540	246190	9	9	9	9	9	9	9	9	9	9	9	9	9	9	9	9	9	9	16335	12824	15095	21270	22125	22811	9	9	9	9	9
MEDP1399	Carnitine C16:2	FA	CAR	396.313	396.313	[M+H]+	C23H41NO4	A	1308800	2052100	621360	737960	544340	813260	19323000	11301000	24950000	9283600	17549000	12520000	8705100	1295800	270140	1341100	2034600	2332300	1103200	1172900	1018900	1489800	1264700	1623100	57814	69591	122620	72378	36505	34006	20624	27984	16079	16479	17981	18570	920940	400600	560080	1171000	887940
MEDP1400	Carnitine C16:3	FA	CAR	394.295	394.295	[M+H]+	C23H39NO4	B	72938	120710	61489	55247	34384	66910	8701700	8430800	10083000	2999900	9467200	5635800	5637300	594600	106790	777360	1076200	1727700	38577	26469	23600	30080	42161	799820	9	9	9	9	9	9	75843	105200	46916	64987	95143	97815	48280	29877	52361	43919	41580
MEDP1401	Carnitine C14-OH	FA	CAR	388.307	388.307	[M+H]+	C21H41NO5	B	1541300	3521800	374280	572970	620100	495370	12081000	4075400	5821800	4235500	3478600	3875700	2907800	1975900	951920	1691700	1236100	1443200	301350	307470	265000	363300	389060	2319200	30654	37061	59683	57293	34883	34995	138050	142110	126600	134610	147710	152240	53070	51081	57366	86876	60144
MEDP1403	Carnitine C15:1	FA	CAR	384.311	384.311	[M+H]+	C22H41NO4	B	9	9	9	9	9	9	9	9	9	9	9	9	9	9	9	9	9	9	9	9	9	9	9	9	9	9	9	9	9	9	9	9	9	9	9	9	9	9	9	9	9
MEDP1404	Carnitine C14:2-OH	FA	CAR	384.274	384.274	[M+H]+	C21H37NO5	B	281840	483070	57103	77368	74971	91445	1662800	738860	1235800	829350	1175800	1358400	893580	677250	419000	584320	453520	436200	16188	10727	13620	15514	15963	778780	9	9	9	9	9	9	7190.3	9	6514.6	4025.6	9	7100.8	9	9	9	9	9
MEDP1405	Carnitine C14:0	FA	CAR	372.313	372.313	[M+H]+	C21H41NO4	A	7564200	15809000	4755100	5584400	4978000	5828500	34771000	24017000	36243000	18664000	26968000	21357000	24466000	5949700	1823300	5297600	6074100	7741800	4679300	5809500	4942200	6504400	5759800	6921700	453360	410820	651390	673760	491550	282830	757020	692790	530470	676700	638880	616660	2982200	2002800	2027700	3684300	2917300
MEDP1406	Carnitine C14:1	FA	CAR	370.297	370.297	[M+H]+	C21H39NO4	B	7426800	13842000	4577500	6043000	5229500	6695800	37913000	22734000	49847000	21204000	25837000	22481000	23071000	5068700	1499300	4762200	6241000	7628300	2572900	2773900	2596300	3258000	3137900	5575700	249490	197630	443320	284170	214720	163910	1443500	1030400	761840	992890	1104300	1025000	1738400	920650	936490	1181700	941590
MEDP1407	Carnitine C14:2	FA	CAR	368.279	368.279	[M+H]+	C21H37NO4	B	3009500	4783600	1282500	1553700	1329400	2033900	8433100	5245500	10093000	5624100	6948200	8517200	9091600	2170600	750710	2063300	2785000	2513000	619650	597600	553560	586340	653520	2827700	18747	25537	44726	12512	10332	8440.8	13240	16081	7967.4	13476	13563	10932	611640	349280	356770	311750	308800
MEDP1408	Carnitine C14:3	FA	CAR	366.264	366.264	[M+H]+	C21H35NO4	B	157120	251180	63184	71942	39747	102940	2661700	3277200	3210600	1060400	2407100	1769200	2167600	410220	132140	438260	616670	578150	9	9	9	9	9	507130	9	9	9	9	9	9	13604	17518	9544.2	18330	19478	17687	26884	19679	22012	13124	13928
MEDP1409	Carnitine C12-OH	FA	CAR	360.3	360.276	[M+H]+	C19H37NO5	B	1431700	3497300	413810	646600	568190	529170	8786300	2283200	4531600	3306900	2951500	4913800	2315600	2095800	926640	1657400	1265800	1438300	31042	20881	22226	33504	22801	2397300	9	9	9	9	9	9	67201	60721	61883	68050	69251	61110	18854	13703	10873	17694	14816
MEDP1410	Carnitine C11:DC	FA	CAR	360.3	360.276	[M+H]+	C18H33NO6	B	1365800	3502100	384020	675280	536510	446590	8554500	2214900	4473400	3312500	2998400	4982900	2257300	2153200	931600	1592600	1279200	1401300	43721	24141	30304	32377	27020	2364700	9	9	9	9	9	9	49354	56244	69592	38772	64826	50649	6245.8	8687.9	22410	25116	14172
MEDP1411	Carnitine C13:0	FA	CAR	358.259	358.259	[M+H]+	C20H39NO4	B	230220	422240	178340	296100	150320	211210	1956500	336990	724890	728380	573600	603470	120790	91431	94368	136380	107000	108600	1758900	1205600	1331200	1154500	1440300	107850	9	9	9	9	9	9	9	9	9	9	9	9	57695	35677	49065	39669	40739
MEDP1412	Carnitine C13:1	FA	CAR	356.279	356.279	[M+H]+	C20H37NO4	B	101030	178490	48989	70575	52870	87078	646440	198700	412150	290160	293190	312930	139390	79229	36885	111840	124660	90778	90071	141860	70514	101940	105160	108960	9	9	9	9	9	9	9	9	9	9	9	9	9	9	9	9	9
MEDP1414	Carnitine C12:1	FA	CAR	342.264	342.264	[M+H]+	C19H35NO4	B	732020	1114500	364800	361510	337600	413400	8430100	3715300	8048500	2842100	3679300	4294300	1437700	374600	152000	360810	409490	454740	57081	55448	35334	92276	107470	435910	9	9	9	9	9	9	56335	44053	19468	52709	45166	38603	95086	63005	69822	58376	46579
MEDP1415	Carnitine C9:DC	FA	CAR	332.2	332.2	[M+H]+	C16H29NO6	B	52273	53094	20616	17226	13821	29982	59572	22997	97575	37759	45543	40042	69032	46800	75433	70294	89272	118840	66460	39731	46849	50653	56545	69911	9	9	9	9	9	9	9	9	9	9	9	9	9	9	9	9	9
MEDP1416	Carnitine C11:0	FA	CAR	330.264	330.264	[M+H]+	C18H35NO4	B	203220	271520	105380	177600	103200	150160	9	9	9	9	9	9	9	9	9	9	9	9	1020100	827460	552370	722200	610790	9	9	9	9	9	9	9	9	9	9	9	9	9	9	9	9	9	9
MEDP1417	Carnitine C10:1-OH	FA	CAR	330.2	330.2	[M+H]+	C17H31NO5	B	9	9	9	9	9	9	338510	391220	577970	349030	281710	210710	244170	266360	122510	233690	149950	145710	9	9	9	9	9	311450	9	9	9	9	9	9	9	9	9	9	9	9	9	9	9	9	9
MEDP1418	Carnitine C11:1	FA	CAR	328.248	328.248	[M+H]+	C18H33NO4	B	9	9	9	9	9	9	937720	184480	487000	408210	303220	254650	85477	77120	50075	145860	87201	76462	19553	21801	11861	16039	18323	82437	9	9	9	9	9	9	9	9	9	9	9	9	9	9	9	9	9
MEDP1419	Carnitine C10:0	FA	CAR	316.25	316.25	[M+H]+	C17H33NO4	A	2493900	3566200	1138200	1594600	1377500	1922000	8420500	4923300	13224000	4554200	3818200	6401800	5373700	2312100	722290	2052700	2304200	2010400	530740	411570	270380	347470	395300	2598400	9	9	9	9	9	9	518410	252940	363330	363510	386560	365780	1194800	608320	459660	419660	289550
MEDP1420	Carnitine C9:2-OH	FA	CAR	314.2	314.2	[M+H]+	C16H27NO5	B	20147	13057	11966	12713	11542	16527	9	9	9	9	9	9	9	9	9	9	9	9	9	9	9	9	9	9	9	9	9	9	9	9	9	9	9	9	9	9	9	9	9	9	9
MEDP1421	Carnitine C10:2	FA	CAR	313.208	312.2	[M+H]+	C17H17NO4	B	9	9	9	9	9	9	85931	78684	83090	34280	56910	39218	107220	60511	19233	50266	45836	34234	9	9	9	9	9	59337	9	9	9	9	9	9	9	9	9	9	9	9	9	9	9	9	9
MEDP1422	Carnitine C8-OH	FA	CAR	304.2	304.2	[M+H]+	C15H29NO5	A	348020	620540	148970	214450	220170	218740	6422500	2776500	4244200	2917800	2312000	3374700	4364300	4027100	1771500	2471400	2560200	2550500	6363.4	15624	10428	10886	16029	4070900	9	9	9	9	9	9	32943	34240	27138	25019	28220	42463	30901	31221	47019	33530	24993
MEDP1423	Carnitine C7:DC	FA	CAR	304.2	304.2	[M+H]+	C14H25NO6	B	335740	290670	195470	184000	114250	174510	176380	74919	84772	81931	126750	110190	87351	68974	58193	65392	91332	69584	9	9	9	9	9	9	9	9	9	9	9	9	9	9	9	9	9	9	86593	24204	9	9	9
MEDP1424	Carnitine C9:0	FA	CAR	302.2	302.233	[M+H]+	C16H31NO4	B	269300	201100	69186	97945	73097	112920	479780	99554	178380	264870	158660	146030	31579	39213	38310	35210	35395	40243	192030	174310	143420	157140	172660	33490	9	9	9	9	9	9	9	9	9	9	9	9	9	9	9	9	9
MEDP1425	Carnitine C7-OH	FA	CAR	290.2	290.2	[M+H]+	C14H27NO5	B	9	9	9	9	9	9	120510	153780	152100	221470	174550	159530	9	9	9	9	9	9	214910	194440	211020	218410	208590	25777	9	9	9	9	9	9	9	9	9	9	9	9	9	9	9	9	9
MEDP1426	Carnitine C6:DC	FA	CAR	290.2	290.2	[M+H]+	C13H23NO6	B	210400	146200	146650	236380	142620	135200	234820	128330	277020	189400	206050	170810	9	9	9	9	9	9	9	9	9	9	9	9	9	9	9	9	9	9	9	9	9	9	9	9	9	9	9	9	9
MEDP1427	Carnitine C8:0	FA	CAR	288.144	288.144	[M+H]+	C15H29NO4	A	2208100	1939300	534000	745420	760140	1251700	6876500	2846700	10310000	2386700	2086800	2719500	3170100	2370400	733460	1876900	1958600	1954200	120280	96220	77417	80042	132270	2602100	9	9	9	9	9	9	192640	60999	122230	136010	131360	121200	789790	361150	305910	273400	158000
MEDP1428	Carnitine C8:1	FA	CAR	286.201	286.201	[M+H]+	C15H27NO4	B	5218400	7557700	4803400	5968300	4339500	6577600	2184100	1448300	4087700	1481800	1012900	1177900	1222700	1723400	387630	1213800	1039500	1234700	23931	9	24517	22027	11169	1725900	9	9	9	9	9	9	9	9	9	9	9	9	96542	35253	48906	37172	32071
MEDP1429	Carnitine C5:DC	FA	CAR	276.181	276.181	[M+H]+	C12H21NO6	B	111900	196290	157350	176240	193610	138300	466760	190700	228190	206070	217950	297560	254980	201850	124090	159070	224180	246800	16270	9	26630	24799	9	205030	9	9	9	9	9	9	9	9	9	9	9	9	230080	64689	49229	54713	38609
MEDP1430	Carnitine C7:0	FA	CAR	274.165	274.165	[M+H]+	C14H27NO4	B	152040	104330	19722	39127	25838	32086	135300	99420	182570	80654	83755	110050	105950	69510	31822	70545	77162	82193	10155	8582.2	13005	6689.1	10162	69342	9	9	9	9	9	9	9	9	9	9	9	9	37559	17807	12205	17615	11019
MEDP1431	Carnitine C7:1Isomer1	FA	CAR	272.186	272.186	[M+H]+	C14H25NO4	B	59826	51286	53893	46537	39445	62804	215050	119390	104320	127680	93781	77494	9	9	9	9	9	9	9	9	9	9	9	9	9	9	9	9	9	9	9	9	9	9	9	9	9	9	9	9	9
MEDP1432	Carnitine C7:1	FA	CAR	272.186	272.186	[M+H]+	C14H25NO4	B	45947	64514	40518	68812	26169	50332	222210	88476	115680	109070	73241	83919	9	9	9	9	9	9	9	9	9	9	9	9	9	9	9	9	9	9	9	9	9	9	9	9	9	9	9	9	9
MEDP1433	Carnitine ph-C1	FA	CAR	266.139	266.139	[M+H]+	C14H19NO4	B	9	9	9	9	9	9	9	9	9	9	9	9	9	9	9	9	9	9	1674100	2105600	2859600	2905900	3008900	9	9	9	9	9	9	9	9	9	9	9	9	9	9	9	9	9	9
MEDP1434	Carnitine C4:DC	FA	CAR	262.128	262.128	[M+H]+	C11H19NO6	A	34619	48047	62224	58167	59484	65616	8604200	14535000	12604000	12258000	17305000	12731000	980420	1308300	1542500	1855300	881310	1602200	57803	85061	63589	52757	50642	1519600	9	9	9	9	9	9	105030	67795	101340	61861	103200	79262	44991	47475	68332	46853	41633
MEDP1435	Carnitine C6:0 Isomer 2	FA	CAR	260.186	260.186	[M+H]+	C13H25NO4	A	5019600	8387300	1933000	2289200	2347100	3063000	13506000	6149400	18980000	9209200	5547600	8314600	9750500	13404000	3617800	8478300	8207000	10268000	284220	242330	296530	306050	327690	14345000	9	9	9	9	9	9	163100	110350	93032	129880	117170	143180	2183600	1279600	1094100	719350	524220
MEDP1436	Carnitine C6:0 Isomer 1	FA	CAR	260.186	260.186	[M+H]+	C13H25NO4	A	4569200	8631100	1960900	2265400	2166800	3244700	13425000	6025400	18431000	9043700	5320000	8089200	9785700	13756000	3401300	8288700	8282500	10217000	313340	220940	284770	280010	326350	14890000	9	9	9	9	9	9	164470	88304	128360	111500	132630	136850	2230400	1236900	1052800	708750	531870
MEDP1437	Carnitine C6:0	FA	CAR	260.186	260.186	[M+H]+	C13H25NO4	A	5019600	8387300	1933000	2289200	2347100	3063000	13506000	6149400	18980000	9209200	5547600	8314600	9750500	13404000	3617800	8478300	8207000	10268000	284220	242330	296530	306050	327690	14345000	9	9	9	9	9	9	163100	110350	93032	129880	117170	143180	2183600	1279600	1094100	719350	524220
MEDP1439	Carnitine C5:0 Isomer	FA	CAR	246.17	246.17	[M+H]+	C12H23NO4	A	1298500	2112900	778440	1595900	1804100	1087200	48779000	33603000	48928000	41478000	57685000	36358000	9751200	17405000	10552000	7733600	10579000	8628800	2358400	1603500	2183700	1893600	2286100	18980000	125410	131130	188180	107850	57376	89392	9	97302	74844	9	9	9	2644300	665920	1091500	925100	621900
MEDP1440	Carnitine C5:0	FA	CAR	246.17	246.17	[M+H]+	C12H23NO4	A	1466700	2370700	991580	1630600	1922100	1210200	54139000	37251000	51680000	45874000	61386000	39548000	10126000	19304000	11793000	8537800	11723000	9177100	2797300	1773800	2288400	2051800	2509000	20541000	132640	125330	237930	87255	58456	86979	9	94578	89481	9	9	9	2929000	810380	1133600	1008200	645450
MEDP1441	Carnitine C5:1	FA	CAR	244.154	244.154	[M+H]+	C12H21NO4	B	9	9	9	9	9	9	3690300	2800800	2511100	2610100	3112500	2198600	128100	167390	148510	126000	131970	119700	41622	9	34441	34028	26623	178010	9	9	9	9	9	9	9	9	9	9	9	9	9	9	9	9	9
MEDP1442	Carnitine C4:0	FA	CAR	232.154	232.154	[M+H]+	C11H21NO4	A	23567000	38937000	17950000	26045000	22242000	26363000	117480000	72308000	103310000	85620000	86556000	70797000	16541000	25257000	7806200	20692000	21492000	17266000	70684000	75097000	81752000	73450000	78000000	26371000	266080	294870	401680	267950	301420	316730	36628	154610	67713	44026	55148	56659	9332700	8981700	8187800	7000000	5674600
MEDP1514	Carnitine C9:0 Isomer1	FA	CAR	302.233	301.225	[M+H]+	C16H31NO4	B	369840	208570	62441	110730	110980	155250	230850	238790	267360	175040	200130	196310	196670	85142	21280	81219	133290	61396	44933	28801	24477	16110	50138	118970	9	9	9	9	9	9	9	9	9	9	9	9	54616	32638	19489	39325	22731
MEDP1515	Carnitine C10:2 Isomer 1	FA	CAR	312.217	311.21	[M+H]+	C17H29NO4	B	9	9	9	9	9	9	200880	41152	68001	65701	52876	78381	9	9	9	9	9	9	9	9	9	9	9	9	9	9	9	9	9	9	9	9	9	9	9	9	9	9	9	9	9
MEDP1516	Carnitine C10:1 Isomer1	FA	CAR	314.233	313.225	[M+H]+	C17H31NO4	B	275190	351670	119190	128860	80980	166150	2972700	593300	1572900	662910	596300	976200	871650	475290	267660	518620	409320	341830	53462	36377	32680	56349	41944	525440	9	9	9	9	9	9	9	9	9	9	9	9	9	9	9	9	9
MEDP1517	Carnitine C10:1	FA	CAR	314.233	313.225	[M+H]+	C17H31NO4	B	669720	684990	56144	123470	102800	178460	3146500	596050	1624500	676820	624370	992970	501210	444860	257850	589950	429680	389470	50573	40786	25359	52863	40400	517660	9	9	9	9	9	9	9	9	9	9	9	9	9	9	9	9	9
MEDP1518	Carnitine C10:0 Isomer1	FA	CAR	316.248	315.241	[M+H]+	C17H33NO4	B	4037300	5818900	1730000	2446700	2017000	2538400	14275000	7482400	19480000	6497100	5956500	10873000	7483200	3673500	977640	3002600	3802500	3319700	704190	555090	403970	511410	634150	3720000	9	9	9	9	9	9	692020	405010	551090	557770	621640	516950	1769300	921110	673850	720070	443040
MEDP1519	Carnitine C12:3	FA	CAR	338.233	337.225	[M+H]+	C19H31NO4	B	9	9	9	9	9	9	239890	105480	200940	82344	53852	69394	147670	59205	34586	71183	63103	64218	9	9	9	9	9	9	9	9	9	9	9	9	9	9	9	9	9	9	9	9	9	9	9
MEDP1520	Carnitine C13:0 Isomer1	FA	CAR	358.295	357.288	[M+H]+	C20H39NO4	B	155360	186140	63843	81483	68439	82930	4539300	5650800	4179800	6515500	8393400	7389500	447500	90274	52113	95007	118380	128200	9	9	9	9	9	9	9	9	9	9	9	9	9	9	9	9	9	9	83799	63268	62720	95101	67655
MEDP1521	Carnitine C14:2 Isomer 1	FA	CAR	368.279	367.272	[M+H]+	C21H37NO4	B	2979800	4491700	1378900	1514600	1322700	2079800	8111800	5396700	9606600	5688300	7309800	8494200	10166000	2139600	763540	2091700	2704200	2699700	609530	571560	596340	614020	707490	2829600	19011	22985	42142	11124	9347.7	6560.5	7007.3	6495.6	6442.5	8983.5	14869	9269.5	678230	397120	411040	394210	327540
MEDP1522	Carnitine C15 Isomer1	FA	CAR	386.327	385.319	[M+H]+	C22H43NO4	B	418210	441410	123160	211920	164890	153830	1379900	983960	1321600	1353800	1725900	1322100	1068100	552320	1517000	376930	573100	506510	9	9	9	9	9	9	9	9	9	9	9	9	9	9	9	9	9	9	184980	179650	180580	295230	238060
MEDP1524	Carnitine C16:2 Isomer1	FA	CAR	396.311	395.304	[M+H]+	C23H41NO4	B	1774600	3287800	898480	1072600	777300	1189800	32318000	17045000	36533000	13765000	16747000	16835000	13226000	1070700	432670	1904800	3147300	3618500	1243800	1778400	1437800	1863600	1984800	2368900	52167	103210	141690	112550	53590	33263	31112	29458	17727	9757.8	23714	12642	1262200	443690	559230	1578700	1176500
MEDP1526	Carnitine C16:2-OH	FA	CAR	412.306	411.298	[M+H]+	C23H41NO5	B	358980	717120	60058	118240	113320	109640	2297600	1073900	1669200	1304900	1657600	1758300	1156100	711730	386320	605790	443570	429280	74877	69332	59357	81939	98231	857870	5597.7	3199.3	8444.3	5200.4	4825.8	1555.3	9	9	9	9	9	9	19580	17133	23820	26029	25466
MEDP1529	Carnitine C18:1-OH	FA	CAR	442.353	441.345	[M+H]+	C25H47NO5	B	1322600	3042400	568620	875940	782940	545100	15437000	5917100	9321000	7981700	8495600	6695600	6302900	1952200	901790	1566500	1187600	2530000	1983800	2548900	2251500	2987400	3400400	2979200	128080	110160	210680	228920	96543	104370	236440	247510	140540	237750	276740	258850	127700	88130	138420	191680	197920
MEDP1530	Carnitine C19	FA	CAR	442.389	441.382	[M+H]+	C26H51NO4	B	1374400	2992000	622270	855170	806490	624630	14142000	5571900	8994500	7564000	7643600	6283700	5404000	2045800	865630	1466900	1275300	2527600	1910700	2386500	2237900	3039000	3472700	2862100	141600	136410	227890	227040	87766	98481	230820	207690	164500	240450	315900	260610	114640	81668	104610	206840	163220
MWC10005412	Pentadecanoic acid	FA	FFA	241.217	242.225	[M-H]-	C15H30O2	A	65950	80899	59227	69267	27976	34359	224860	150470	164160	96230	49878	53154	9	9	9	120730	16988	19808	9	9	9	123220	45274	21473	286670	106620	9	181590	38700	34207	403590	234430	9	120460	58027	31509	9	9	9	98903	25147
MWC10005411	(+)-12-methyl myristic acid	FA	FFA	241.218	242.225	[M-H]-	C15H30O2	A	9	9	57665	81541	24335	25666	214420	150630	154430	98362	45433	42198	9	9	9	102320	22157	27682	9	9	9	9	9	9	267980	163560	329210	205800	32225	28784	403260	224110	152240	147240	35817	9	9	9	9	106510	23126
MWC10137145	3-Hydroxybutyrylcarnitine	FA	CAR	230.139	247.142	[M+H-H2O]+	C11H21NO5	A	36426	59964	24401	26066	22356	19361	1732000	1358400	1831400	1863800	1658300	1527600	651500	817300	659270	696450	641980	604780	12465000	14695000	11879000	9786900	12216000	914830	9	9	9	9	9	9	9	9	9	9	9	9	94661	83812	100710	141670	111930
MWC10137641	3-Hydroxyhexadecanoylcarnitine	FA	CAR	416.335	415.33	[M+H]+	C23H45NO5	A	1736400	1774900	2015400	1649800	2310100	1451400	1110200	1211100	1089500	1513800	1204100	1071300	1360900	1522400	1379400	1750700	1353000	2482700	1475300	1529900	1487600	2022200	1828800	2005800	2496700	3480200	2147700	2266000	2049900	3305600	582400	376440	474710	380240	378380	602050	1851800	2071700	1883600	1765300	1836200
MWC10144286	3-Hydroxymyristic acid	FA	FFA	243.197	244.204	[M-H]-	C14H28O3	B	15649	18208	22869	23591	20206	14077	9	2388.5	3051.4	5430.4	3310.5	1657.9	19089	20152	14596	15783	14804	13573	19604	17817	22683	22467	23960	14916	22257	17856	17054	22358	20503	18764	15837	12664	9819.1	14366	15291	17317	21389	18801	20663	23615	24614
MWC10126557	3-hydroxy-tetradecanoic acid	FA	FFA	243.197	244.204	[M-H]-	C14H28O3	A	3442.7	10061	7056.1	7528.1	8060.8	18022	10569	18338	7144.1	11232	13463	13686	9	9	9	9	9	9	9	9	9	9	9	9	19907	27246	15044	21072	10339	16019	480270	332660	691510	725600	553770	553300	9	9	9	9	9
MWC10144206	Palmitoyl-L-Carnitine	FA	CAR	436.28	399.335	[M-2H+K]-	C23H45NO4	A	612280	543820	694160	520880	605580	826830	471020	637750	719730	620180	471800	505530	136760	390020	511530	498610	453370	479850	547640	543790	798710	507170	751270	408910	462890	281600	461470	382880	405880	396080	833860	1031600	784160	850980	727830	702380	199190	214500	196420	176610	224030
MEDP1087	MG (18: 2 (9Z, 12Z) / 0: 0/0: 0) [rac]	GL	MG	337.3	354.277	[M-H2O+H]+	C21H38O4	A	721790	573350	695120	624220	719810	1023800	4285400	3305600	3937400	4238800	3448800	3900000	223470	581750	915170	888210	889990	945250	895050	816810	1027400	775810	1045800	586270	2605600	4239700	3316700	2942300	2999100	3012200	464120	598240	617760	606500	462360	387120	575140	603820	654220	531350	687290
MEDP1097	2-Linoleoyl Glycerol	GL	MG	355	354.277	[M+H]+	C21H38O4	A	971140	1627600	1203600	990080	1211900	1704400	2812100	2678200	3556700	3937100	3596700	3237600	241790	239230	352260	192950	273750	506440	93220	102700	93398	115840	117980	285330	2500400	2439500	2421000	2128900	1533200	1252300	13946	23347	21343	16656	30836	37932	1295800	1089900	1039600	743490	828390
MEDP1230	Glycidyl oleate	GL	MG	339.289	338.282	[M+H]+	C21H38O3	B	27343	95753	50354	41957	69832	110740	188810	137700	126170	122210	170150	151490	9	9	9	9	9	9	9	9	9	9	9	9	199850	357220	180560	226890	125520	155150	9	9	9	9	9	9	47464	51529	38029	30892	42330
MEDP1317	MAG(16:1)	GL	MG	331.274	330.304	[M+H]+	C19H38O4	B	207740	205610	185710	178390	183390	262640	359550	397770	314070	316120	267490	281520	115210	118900	115480	110480	117290	134450	146500	129270	166270	177710	171040	133060	251830	275490	304940	291590	266770	237620	131510	119700	126210	178890	143320	88767	242770	212220	203140	133410	153510
MEDP1449	MG(22:6)isomer	GL	MG	403.284	402.276	[M+H]+	C25H38O4	A	82832	110700	101800	52919	114270	183650	26053	32732	23148	15688	11935	16843	9	9	9	9	9	9	12663	25019	28493	37296	9602.9	9	9	9	9	9	9	9	9	9	9	9	9	9	9	9	9	9	9
MEDP1450	MG(22:6)	GL	MG	403.284	402.276	[M+H]+	C25H38O4	A	82832	110700	101800	52919	114270	183650	26053	32732	23148	15688	11935	16843	9	9	9	9	9	9	12663	25019	28493	37296	9602.9	9	9	9	9	9	9	9	9	9	9	9	9	9	9	9	9	9	9
MEDP1453	MG(20:5)isomer	GL	MG	377.3	376.261	[M+H]+	C23H36O4	A	2062200	4268900	2784700	2268000	2513700	2424300	12766000	15702000	17534000	13793000	17707000	14196000	9	9	9	9	9	9	114360	102550	108530	162600	101510	9	9	9	9	9	9	9	9	9	9	9	9	9	8213	22828	11034	25497	19204
MEDP1454	MG(20:5)	GL	MG	377.3	376.261	[M+H]+	C23H36O4	A	2062200	4268900	2784700	2268000	2513700	2424300	12766000	15702000	17534000	13793000	17707000	14196000	9	9	9	9	9	9	114360	102550	108530	162600	101510	9	9	9	9	9	9	9	9	9	9	9	9	9	8213	22828	11034	25497	19204
MEDP1455	MG(20:4)isomer	GL	MG	379.285	378.276	[M+H]+	C23H38O4	A	338380	572220	295160	335720	322320	213840	18217000	22702000	22677000	17215000	20135000	15343000	9	9	9	9	9	9	232650	168460	161320	253550	159660	9	490720	506730	547380	493080	554590	433370	4349.5	6556.3	9	1248.7	2002.3	1876.7	6751.6	17347	12433	18736	7460.5
MWC10064152	MG(0:0/18:1(9Z)/0:0)	GL	MG	339.29	356.293	[M+H-H2O]+	C21H40O4	B	116470	331600	191500	108820	273170	456120	4064100	2912900	3030900	2188000	2778600	2070800	11306	17495	34288	18726	17662	51310	13943	24270	12437	29990	22504	40248	2014700	4472800	3100800	2104600	1517600	1791400	41646	84017	65316	54533	83905	70855	234290	130520	163440	87863	112540
MWC10127114	MG(18:1(9Z)/0:0/0:0)[rac]	GL	MG	357.301	356.293	[M+H]+	C21H40O4	B	54064	137060	83520	55696	145020	194620	2001200	1094400	1075900	963080	1192000	977610	4313.4	11415	20397	8459.4	14468	27544	4829.3	6341.8	4953.6	4781.3	5488.2	15597	935760	2142400	1567200	1227800	683520	949760	24176	38050	23602	23261	30576	26839	114310	53643	74364	36843	53376
MEDN0352	O-Phosphorylethanolamine	GP	PE	140.011	141.019	[M-H]-	C2H8NO4P	A	335480	590980	216600	231020	291030	357050	712300	635510	713060	563490	949520	720700	1775500	2107000	1308600	1801200	2938600	2366900	2265900	1879400	1607600	1975300	1642100	1948500	5616500	10089000	6676900	6127000	8866100	4050000	10768000	10491000	10687000	10178000	11245000	9996400	22677000	16596000	13145000	14308000	17996000
MEDN0358	Lysops 22:5	GP	LPS	570.283	571.3	[M-H]-	C28H46NO9P	A	9	9	9	9	9	9	160000	41423	54359	24863	95552	42644	9	9	9	9	9	9	9	9	9	9	9	9	9	9	9	9	9	9	9	9	9	9	9	9	9	9	9	9	9
MEDN0360	Lysopg 18:1	GP	LPG	509.288	510.29	[M-H]-	C24H47O9P	A	22171	17541	12359	9867.1	22382	23641	98092	174150	101230	58250	9	100110	10061	15107	14121	18824	20845	14588	9	9	9	9	9	9	28346	17302	28520	33527	14150	11158	339410	338380	369680	368130	376940	317420	8915.2	5159.4	5690.4	4332	5420
MEDN0362	Lysope 18:1	GP	LPE	478.293	479.3	[M-H]-	C23H46NO7P	A	290670000	237910000	292600000	268190000	300010000	342140000	402650000	426710000	442840000	427140000	400550000	425150000	60042000	86616000	113080000	105360000	111200000	111420000	218780000	207690000	260070000	184380000	273470000	97589000	362410000	356530000	374450000	372020000	379720000	364470000	413650000	428500000	419330000	424570000	434890000	426030000	110450000	110610000	112690000	105660000	131460000
MEDN0364	Lysope 18:0	GP	LPE	480.309	481.3	[M-H]-	C23H48NO7P	A	6720300	8693800	6707600	6299700	8758000	6872000	143700000	161560000	121590000	114120000	83104000	131180000	13514000	13725000	14291000	14131000	18687000	15324000	2635200	2020400	5234800	1472200	6114700	15894000	97342000	94080000	73584000	105690000	84055000	86579000	357020000	373960000	379110000	400800000	337350000	320690000	10100000	7951500	8250900	9718000	9497100
MEDN0366	Lysope 16:0	GP	LPE	452.278	453.3	[M-H]-	C21H44NO7P	A	37296000	30070000	39487000	32452000	37582000	58502000	201700000	191270000	169360000	165270000	100800000	182830000	15748000	18536000	18721000	17049000	22102000	19326000	98715000	89234000	124200000	70809000	136040000	21037000	118120000	155920000	133150000	133190000	119770000	121400000	320440000	330040000	324110000	338740000	322990000	300840000	36925000	32117000	33359000	36159000	35544000
MEDN0368	Lysope 14:0	GP	LPE	424.246	425.2	[M-H]-	C19H40NO7P	A	2162600	1820400	3189800	2590000	2421500	5615500	4227200	4002300	3183000	2867800	1827900	3784000	338150	1267300	1832800	1798200	1581000	1814900	1939200	2252700	2520400	1825300	3009900	1374200	1644200	3427000	2480100	1847600	2168100	1935900	14307000	15715000	14968000	18426000	14456000	12187000	1589900	1672500	1439000	1610700	1890500
MEDN0370	Lysopa 18:0	GP	LPC	437.267	438.27	[M-H]-	C21H43O7P	A	80276	74605	61229	38589	71346	74306	327200	285950	315360	217740	90154	284490	53768	50572	53596	61880	84555	72569	11994	14200	24236	9	37587	91219	84784	57935	68674	89978	41050	52456	942710	912570	847010	923210	716800	733760	28327	21058	28828	13695	13975
MEDN0372	Lysopa 16:0	GP	LPC	409.236	410.24	[M-H]-	C19H39O7P	A	1116900	781830	991130	835170	983450	1285100	697790	543450	773480	807050	413690	802660	181450	361790	437810	426620	391530	414870	1224500	1267900	1612900	1133800	1813500	421060	442680	450070	479760	455650	432580	446440	1481000	1269400	1269500	1397100	1357700	997930	256140	259120	239240	213280	236030
MEDN0588	Glycerol 3-phosphate	GP	PG	171.006	172.014	[M-H]-	C3H9O6P	B	13052000	9697300	10488000	7176100	8759800	10046000	7623100	21715000	13086000	12385000	17805000	16522000	2740300	7889300	12178000	7823200	8733900	9122300	92264000	87902000	109440000	110330000	151740000	7036900	142520000	117220000	189310000	72576000	144150000	183010000	18477000	9924600	20622000	15173000	9563600	9526000	45475000	36549000	38202000	50392000	48399000
MEDN1258	PysoPS 16:2	GP	LPS	490.221	491.228	[M-H]-	C22H38NO9P	B	19630	17661	19128	16615	21175	20029	14571	12414	20813	16526	9746.3	10958	5624.4	10556	17569	14095	14826	15262	17856	16426	19559	17554	24217	12911	13288	11383	14108	17492	14809	12575	16360	14205	18914	15169	14835	13149	7392.9	5849.9	7606.2	6693.7	6645.4
MEDN1264	PysoPE 22:4(2n isomer1)	GP	LPE	528.31	529.302	[M-H]-	C27H48NO7P	A	3024.7	9	9	9	9	9	2071500	1479200	2017100	1149400	992740	1877800	9	9	9	9	9	9	10483	11311	13960	9485.8	16091	9	101150	133700	160040	103210	129480	111270	9	9	9	9	9	9	9	221.81	9	9	9
MEDN1265	PysoPE 22:4	GP	LPE	528.31	529.302	[M-H]-	C27H48NO7P	A	3024.7	9	9	9	9	9	2071500	1479200	2017100	1149400	992740	1877800	9	9	9	9	9	9	10483	11311	13960	9485.8	16091	9	101150	133700	160040	103210	129480	111270	9	9	9	9	9	9	9	221.81	9	9	9
MEDN1266	PysoPE 22:5(2n isomer3)	GP	LPE	526.296	527.302	[M-H]-	C27H46NO7P	A	9	9	9	9	9	9	873020	1007400	907090	555850	758690	812750	9	9	9	9	9	27688	9	9	9	9	9	9	9	9	9	9	9	9	9	9	9	9	9	9	9	9	9	9	9
MEDN1267	PysoPE 22:5(2n isomer2)	GP	LPE	526.296	527.302	[M-H]-	C27H46NO7P	A	9	9	9	9	9	9	873020	1007400	907090	555850	758690	812750	9	9	9	9	9	27688	9	9	9	9	9	9	9	9	9	9	9	9	9	9	9	9	9	9	9	9	9	9	9
MEDN1268	PysoPE 22:5(2n isomer1)	GP	LPE	526.296	527.302	[M-H]-	C27H46NO7P	A	9	9	9	9	9	9	873020	1007400	907090	555850	758690	812750	9	9	9	9	9	27688	9	9	9	9	9	9	9	9	9	9	9	9	9	9	9	9	9	9	9	9	9	9	9
MEDN1269	PysoPE 22:6(2n isomer1)	GP	LPE	524.279	525.285	[M-H]-	C27H44NO7P	A	14619	10914	11967	8260	14787	22473	213490	243350	228630	129500	175840	189830	9	9	9	9	9	9	21610	12333	20441	23036	18158	9	9	9	9	9	9	9	9	9	9	9	9	9	9	9	9	9	9
MEDN1270	PysoPE 22:6	GP	LPE	524.279	525.285	[M-H]-	C27H44NO7P	A	14619	10914	11967	8260	14787	22473	213490	243350	228630	129500	175840	189830	9	9	9	9	9	9	21610	12333	20441	23036	18158	9	9	9	9	9	9	9	9	9	9	9	9	9	9	9	9	9	9
MEDN1271	PysoPE 20:2(2n isomer1)	GP	LPE	504.311	505.296	[M-H]-	C25H48NO7P	A	101390	87333	94293	83051	119960	140260	36049000	22717000	27106000	19313000	14069000	25301000	143450	205990	234350	207970	276770	226630	538040	328620	643500	339120	707200	218380	3472500	5692400	5336900	3327600	4366900	3585100	701790	1094800	877810	973520	674760	511020	127640	104420	116070	91186	91117
MEDN1272	PysoPE 20:2	GP	LPE	504.311	505.296	[M-H]-	C25H48NO7P	A	101390	87333	94293	83051	119960	140260	36049000	22717000	27106000	19313000	14069000	25301000	143450	205990	234350	207970	276770	226630	538040	328620	643500	339120	707200	218380	3472500	5692400	5336900	3327600	4366900	3585100	701790	1094800	877810	973520	674760	511020	127640	104420	116070	91186	91117
MEDN1273	PysoPE 20:3(2n isomer1)	GP	LPE	502.295	503.296	[M-H]-	C25H46NO7P	A	317490	320530	316500	274780	500580	665430	161690000	135300000	153660000	115140000	124110000	127330000	28816	42050	49939	52474	56310	52396	7018800	5886100	6039000	5596600	6275700	45044	2421800	3399700	5451300	3547200	3286900	2379800	6898000	8460800	8112600	8519200	7406600	5743000	160030	142520	163420	132760	152140
MEDN1274	PysoPE 20:3	GP	LPE	502.295	503.296	[M-H]-	C25H46NO7P	A	317490	320530	316500	274780	500580	665430	161690000	135300000	153660000	115140000	124110000	127330000	28816	42050	49939	52474	56310	52396	7018800	5886100	6039000	5596600	6275700	45044	2421800	3399700	5451300	3547200	3286900	2379800	6898000	8460800	8112600	8519200	7406600	5743000	160030	142520	163420	132760	152140
MEDN1276	PysoPE 20:4(2n isomer1)	GP	LPE	500.28	501.286	[M-H]-	C25H44NO7P	A	1170100	877440	891230	610250	1117100	3513600	295710000	296210000	286700000	280820000	294790000	295570000	98098	95564	176930	117300	115320	201620	36343000	33960000	34671000	33407000	33274000	109220	9	9	9	9	9	9	696070	4786400	977400	298610	215570	189760	137040	63225	76093	66562	157560
MEDN1277	PysoPE 20:5(2n isomer1)	GP	LPE	498.263	499.27	[M-H]-	C25H42NO7P	A	2696600	2000700	2274400	1863200	3094800	4418800	257830000	244720000	252860000	220560000	251250000	234020000	26071	34245	71588	38330	34683	52384	12699000	9712100	15041000	18554000	14421000	31130	26121	43535	66221	24214	38112	34760	269440	8115300	575630	140750	91498	78694	62526	24871	30769	28958	58409
MEDN1278	PysoPE 20:5	GP	LPE	498.263	499.27	[M-H]-	C25H42NO7P	A	2696600	2000700	2274400	1863200	3094800	4418800	257830000	244720000	252860000	220560000	251250000	234020000	26071	34245	71588	38330	34683	52384	12699000	9712100	15041000	18554000	14421000	31130	26121	43535	66221	24214	38112	34760	269440	8115300	575630	140750	91498	78694	62526	24871	30769	28958	58409
MEDN1279	PysoPE 18:0(2n isomer)	GP	LPE	480.309	481.3	[M-H]-	C23H48NO7P	A	6720300	8693800	6707600	6299700	8758000	6872000	143700000	161560000	121590000	114120000	83104000	131180000	13514000	13725000	14291000	14131000	18687000	15324000	2635200	2020400	5234800	1472200	6114700	15894000	97342000	94080000	73584000	105690000	84055000	86579000	357020000	373960000	379110000	400800000	337350000	320690000	10100000	7951500	8250900	9718000	9497100
MEDN1282	PysoPE 18:2	GP	LPE	476.279	477.286	[M-H]-	C23H44NO7P	A	249270000	206750000	234790000	220160000	242090000	286050000	259250000	268650000	271550000	284320000	260810000	275240000	107490000	224480000	271740000	272020000	259720000	272980000	247590000	243980000	280660000	221590000	294920000	229870000	327060000	307240000	322530000	328440000	345620000	325830000	168150000	191760000	198400000	205110000	172250000	145550000	188250000	190230000	193890000	181040000	210910000
MEDN1283	PysoPE 18:3(2n isomer)	GP	LPE	474.264	475.27	[M-H]-	C23H42NO7P	A	7429100	5359300	8341200	7178500	8420500	14598000	197570000	196920000	197170000	183300000	190220000	195910000	81014000	187750000	223370000	232020000	219980000	226360000	7725100	6178100	9235300	5733100	10265000	198550000	103280000	148180000	124450000	111880000	113510000	111540000	215620000	244160000	234090000	248750000	223870000	199200000	6834700	7598000	7892700	5409800	8000400
MEDN1284	PysoPE 18:3	GP	LPE	474.262	475.27	[M-H]-	C23H42NO7P	A	7140500	5347500	8212400	7131700	8189600	14376000	188050000	187540000	189960000	175260000	184800000	186630000	79154000	180520000	217010000	221840000	209930000	216220000	6524200	6135000	8915000	5447200	9748800	191550000	101380000	139030000	120790000	109470000	110490000	108970000	208940000	239010000	226100000	239680000	218670000	192860000	6718600	7476700	8014500	5257500	8114400
MEDN1285	PysoPE 16:0(2n isomer)	GP	LPE	452.278	453.3	[M-H]-	C21H44NO7P	A	37296000	30070000	39487000	32452000	37582000	58502000	201700000	191270000	169360000	165270000	100800000	182830000	15748000	18536000	18721000	17049000	22102000	19326000	98715000	89234000	124200000	70809000	136040000	21037000	118120000	155920000	133150000	133190000	119770000	121400000	320440000	330040000	324110000	338740000	322990000	300840000	36925000	32117000	33359000	36159000	35544000
MEDN1287	PysoPE 16:1	GP	LPE	450.264	451.286	[M-H]-	C21H42NO7P	A	5762900	4388600	7577100	5538200	6344600	11619000	147480000	112060000	105560000	76927000	67691000	147410000	2804100	8708900	14953000	14361000	11425000	15134000	3615500	3333600	4992200	2804800	5584000	9452400	113110000	182790000	188790000	130320000	173130000	172980000	245890000	270090000	247980000	300170000	246190000	219290000	3378300	3341100	3430700	3319800	4012700
MEDP0336	Lysopc 14:0	GP	LPC	468.3	467.3	[M+H]+	C22H46NO7P	A	69769000	40651000	63014000	52548000	70169000	106180000	143860000	155600000	124920000	116330000	96414000	126840000	11147000	45319000	49402000	53100000	48821000	47034000	29893000	34129000	42839000	29766000	50898000	44990000	26256000	30021000	30310000	28136000	34428000	33528000	167570000	186660000	184290000	208960000	182300000	144730000	8717400	8138700	8088600	8101600	9105600
MEDP0338	Lysopc 16:0	GP	LPC	496.33	495.3	[M+H]+	C24H50NO7P	A	288520000	245660000	266590000	253470000	279080000	297690000	307590000	301170000	307150000	305310000	274130000	302910000	75857000	149450000	168150000	173260000	157940000	157670000	304110000	311930000	317580000	298130000	312200000	149290000	214040000	237110000	235220000	224560000	209080000	196240000	302960000	299060000	302040000	287570000	291480000	304820000	112580000	108340000	113310000	103090000	117160000
MEDP0340	Lysopc 16:1	GP	LPC	494.31	493.3	[M+H]+	C24H48NO7P	A	123130000	79339000	117090000	91579000	126660000	191370000	271280000	281930000	321770000	314320000	256700000	264160000	43206000	160860000	221900000	225080000	192000000	219990000	98913000	96313000	129200000	84577000	145640000	167180000	294490000	278230000	302190000	299390000	300580000	294630000	374550000	360950000	367060000	330230000	367660000	411540000	19295000	16837000	17704000	17846000	20554000
MEDP0342	Lysopc 18:0	GP	LPC	524.36	523.36	[M+H]+	C26H54NO7P	A	123480000	103150000	85074000	77744000	120690000	125670000	389990000	374500000	368360000	335490000	244670000	362620000	109640000	122250000	122790000	125910000	150880000	134450000	24428000	19813000	43063000	16742000	53097000	121270000	168650000	119970000	150070000	188810000	93082000	106770000	330470000	278850000	282070000	214120000	269690000	337360000	63652000	47732000	60614000	50505000	46739000
MEDP0344	Lysopc 18:1	GP	LPC	522.35	521.35	[M+H]+	C26H52NO7P	A	171650000	105030000	159110000	129090000	148820000	197180000	281760000	254960000	267500000	281010000	264570000	276040000	285180000	349810000	302140000	358060000	345840000	345120000	132030000	132230000	173900000	123820000	205830000	335240000	156380000	179550000	169910000	175520000	164010000	166880000	224470000	278850000	295500000	243620000	288420000	287060000	315150000	343720000	339720000	333580000	345150000
MEDP0346	Lysopc 18:2	GP	LPC	520.33	519.35	[M+H]+	C26H50NO7P	A	145730000	115570000	130660000	120870000	136370000	158290000	139140000	149280000	150750000	150100000	120940000	128220000	73766000	140540000	155990000	171770000	162470000	161080000	147900000	147750000	167160000	133810000	170890000	135140000	133930000	123000000	125140000	133830000	131630000	119790000	118900000	127300000	131570000	142260000	125540000	107850000	103330000	97803000	102840000	97586000	110580000
MEDP0350	Lysopc 20:1	GP	LPC	550.37	549.37	[M+H]+	C28H56NO7P	A	1275600	1010900	2647200	1587100	1899200	2233500	220570000	238000000	105110000	93116000	103550000	161280000	187140	618800	835540	908560	857060	1025500	1339000	959140	1759400	929800	2133400	564920	3199100	3651300	5756600	4681300	3366400	2759500	175150000	193220000	200090000	256480000	193030000	152690000	1860400	1826700	1947100	1365700	1749900
MEDP0352	Lysopc 20:2	GP	LPC	548.36	547.37	[M+H]+	C28H54NO7P	A	8402900	4150200	7609800	5920200	8998400	11705000	276450000	243660000	260270000	244860000	197880000	265090000	1958100	8293600	12088000	11441000	11411000	10759000	65091000	48946000	82875000	49637000	91141000	8564600	35386000	51519000	57630000	35313000	47087000	42843000	10003000	14864000	13273000	13426000	10301000	7461000	4063400	4271700	5322100	3418400	5201400
MEDP0434	Lysopc 17:0	GP	LPC	510.1	509.348	[M+H]+	C25H52NO7P	A	13145000	6705700	7488000	6560000	9619200	11573000	74779000	61784000	50876000	41402000	23393000	54038000	3086300	4025800	4202500	4570700	5249500	3977200	10057000	9365000	14738000	7055500	16856000	4253900	1935200	1882100	2191600	2640400	1218900	1248400	71803000	88302000	85084000	110980000	84254000	55318000	3374500	2828700	2858000	2696000	2798300
MEDP0494	Lysopc 15:0	GP	LPC	482.3	481.317	[M+H]+	C23H48NO7P	A	8697500	4510700	5344600	4787600	6629400	9501400	14366000	13295000	14791000	17943000	9656300	16851000	1179500	3020800	3283400	3713900	3179200	2989900	13350000	14209000	21333000	12085000	22941000	3008600	332880	269170	410860	486440	386730	383800	8507200	9776300	8923800	12167000	9064600	5890700	1488500	1562200	1414000	1265100	1362200
MEDP0495	Lysope 18:2 (2N Isomer)	GP	LPE	520.33	519.332	[M+H]+	C26H50NO7P	A	145730000	115570000	130660000	120870000	136370000	158290000	139140000	149280000	150750000	150100000	120940000	128220000	73766000	140540000	155990000	171770000	162470000	161080000	147900000	147750000	167160000	133810000	170890000	135140000	133930000	123000000	125140000	133830000	131630000	119790000	118900000	127300000	131570000	142260000	125540000	107850000	103330000	97803000	102840000	97586000	110580000
MEDP0498	Lysopc 18:3	GP	LPC	518.3	517.317	[M+H]+	C26H48NO7P	A	77040000	60406000	67655000	64561000	71991000	79821000	75133000	73923000	75965000	72902000	55179000	72884000	13593000	28049000	32544000	34649000	30363000	32077000	81917000	79126000	87778000	79739000	92846000	34207000	38495000	45886000	43172000	42490000	38861000	35942000	93598000	93636000	93426000	92913000	94137000	91042000	14425000	15368000	16713000	15104000	17065000
MEDP0537	PAF C-16	GP	LPC	524.36	523.364	[M+H]+	C26H54NO7P	A	123480000	103150000	85074000	77744000	120690000	125670000	389990000	374500000	368360000	335490000	244670000	362620000	109640000	122250000	122790000	125910000	150880000	134450000	24428000	19813000	43063000	16742000	53097000	121270000	168650000	119970000	150070000	188810000	93082000	106770000	330470000	278850000	282070000	214120000	269690000	337360000	63652000	47732000	60614000	50505000	46739000
MEDP0638	LysoPE(16:1(9Z)/0:0)	GP	LPE	452.27	451.27	[M+H]+	C21H42NO7P	A	199630	158190	278300	199500	228490	414050	7112400	5444000	5338800	3711100	3186100	8493000	92422	321180	587440	576170	429190	555820	143500	150190	202820	140630	228890	324590	5550800	11176000	11565000	6478200	9906600	10171000	12101000	13386000	11241000	14679000	12406000	10414000	139060	125890	131730	134960	162830
MEDP1068	1,2-dioctanoyl PC	GP	PC	510.3	509.312	[M+H]+	C24H48NO8P	B	273280	181440	218310	215440	305670	299810	3280800	2203500	1585300	1280700	2520200	2118700	142490	489950	546930	383160	482200	490420	241210	276720	245500	227980	280020	462720	400190	920400	695010	598220	535510	641490	839680	1032400	962350	1031700	808830	833050	68749	75578	77227	60004	113550
MEDP1096	1,2-dodecanoyl PC	GP	PC	548.4	548.353	[M-H2O+H]+	C28H56NO8P	B	1639500	1056600	1160400	777000	1592600	1495200	11488000	9786400	11229000	5614100	9	9	9	9	9	9	10972	9	10452000	11014000	10926000	10138000	9750300	9	1449100	1227100	2131200	1917500	1450200	985890	9	9	9	9	9	9	422640	408900	384050	295820	339400
MEDP1146	Hemolytic PAF C-18	GP	LPC	510.4	509.385	[M+H]+	C26H56NO6P	A	1974400	3110100	2088100	2070100	3190800	2451100	66761000	81405000	53741000	41581000	73003000	61658000	513750	527440	451120	591100	648490	506530	840120	990710	869650	1114700	919300	486130	1476500	902650	3022700	3190100	756510	521030	104760000	129790000	131700000	196640000	113150000	81393000	929440	853600	962100	733200	735890
MEDP1160	PE (18: 1 (9Z) / 0: 0)	GP	PE	480.3	479.301	[M+H]+	C23H46NO7P	B	219570000	221270000	225370000	223670000	224750000	221510000	176160000	189730000	189620000	192060000	194490000	186790000	117450000	134780000	154320000	153850000	157560000	160990000	216810000	210290000	219210000	208750000	221830000	136230000	240200000	234690000	210770000	228210000	226670000	241920000	62328000	68761000	64060000	61887000	62319000	59261000	192880000	192590000	192240000	180970000	205740000
MEDP1165	2-O-ethyl PAF C-16	GP	LPC	510.4	509.385	[M+H]+	C26H56NO6P	A	1974400	3110100	2088100	2070100	3190800	2451100	66761000	81405000	53741000	41581000	73003000	61658000	513750	527440	451120	591100	648490	506530	840120	990710	869650	1114700	919300	486130	1476500	902650	3022700	3190100	756510	521030	104760000	129790000	131700000	196640000	113150000	81393000	929440	853600	962100	733200	735890
MEDP1166	1-O-palmitoyl-2-O-acetyl-sn-glycerol-3-phosphate choline	GP	PC	538.3	537.343	[M+H]+	C26H52NO8P	B	106590	80218	83482	53667	85270	111350	4824800	2855500	3235300	1530100	3164100	3094900	47410	92940	55268	46571	69246	59704	68030	63941	90442	66411	48474	69627	87915	137160	136420	121230	102220	157540	558860	772760	714220	582930	745400	593840	64532	53721	80183	70810	95064
MEDP1221	2-O-methyl PAF C-16	GP	LPC	496.3	495.369	[M+H]+	C25H54NO6P	A	274350000	285890000	284030000	290840000	284080000	266860000	190580000	216230000	206330000	229720000	257580000	218290000	148560000	245550000	263040000	273770000	262960000	254240000	275370000	266390000	258470000	273270000	241320000	231780000	298230000	319970000	309780000	302330000	297700000	286700000	38978000	31178000	35586000	28284000	35771000	42773000	204820000	195760000	199060000	184940000	203290000
MEDP1318	LysoPC 22:4 (2n isomer1)	GP	LPC	572.363	572.363	[M+H]+	C30H55NO7P	A	48114	20456	33164	29864	49845	60186	3143200	2422000	2863500	2089500	1790200	2654800	9	9	9	9	9	9	604180	810800	971010	791480	1173600	9	177840	179290	267380	156720	174630	202440	9	9	9	9	9	9	9	9	9	9	9
MEDP1319	LysoPC 22:4	GP	LPC	572.363	572.363	[M+H]+	C30H55NO7P	A	48114	20456	33164	29864	49845	60186	3143200	2422000	2863500	2089500	1790200	2654800	9	9	9	9	9	9	604180	810800	971010	791480	1173600	9	177840	179290	267380	156720	174630	202440	9	9	9	9	9	9	9	9	9	9	9
MEDP1320	LysoPC 22:5 (2n isomer3)	GP	LPC	570.346	570.357	[M+H]+	C30H53NO7P	B	141030	67792	114160	78027	141660	198980	1667500	2005000	1794200	1152600	1440300	1418800	9	9	9	9	9	193130	377890	211010	475890	420110	428960	9	9	9	9	9	9	9	9	9	9	9	9	9	9	9	9	9	9
MEDP1321	LysoPC 22:5 (2n isomer2)	GP	LPC	570.346	570.357	[M+H]+	C30H53NO7P	B	141030	67792	114160	78027	141660	198980	1667500	2005000	1794200	1152600	1440300	1418800	9	9	9	9	9	193130	377890	211010	475890	420110	428960	9	9	9	9	9	9	9	9	9	9	9	9	9	9	9	9	9	9
MEDP1322	LysoPC 22:5 (2n isomer1)	GP	LPC	570.347	570.357	[M+H]+	C30H53NO7P	B	88827	42447	89734	60781	91694	85421	1096100	1051500	822420	410440	1036000	594610	9	9	9	9	9	161610	135170	90258	146030	172390	109700	9	9	9	9	9	9	9	9	9	9	9	9	9	9	9	9	9	9
MEDP1325	LysoPC 22:6	GP	LPC	568.33	568.33	[M+H]+	C30H51NO7P	B	1637900	911690	1309400	939380	1548300	2247000	1383900	1559200	1429000	593760	1199100	743500	9	9	9	9	9	9	2853800	1705400	2906100	3278700	2450600	9	9	9	9	9	9	9	9	9	9	9	9	9	9	9	9	9	9
MEDP1326	LysoPC 20:1(2n isomer)	GP	LPC	550.37	550.387	[M+H]+	C28H57NO7P	A	748080	559780	1488800	890610	1123100	1229900	139590000	161060000	66128000	57538000	61745000	102000000	85097	306890	404580	437920	444270	513230	780330	589730	1117400	595590	1224900	322450	1806000	2046200	3301200	2623100	1954700	1491300	117100000	134330000	142730000	191790000	138000000	102720000	1046900	948900	1018000	774630	1088900
MEDP1328	LysoPC 20:2(2n isomer2)	GP	LPC	548.362	548.371	[M+H]+	C28H55NO7P	A	5210400	2668100	5048500	3697700	5887900	7397900	225350000	188050000	213510000	198020000	149770000	221610000	1209700	5078500	7581100	7269700	7201600	6639800	42738000	32151000	53684000	32255000	61264000	5304400	22093000	31951000	35940000	22109000	30814000	26872000	6868800	10121000	8757500	9301400	7054200	4944700	2654800	2594900	3348600	2184100	3201300
MEDP1330	LysoPC 20:2(2n isomer1)	GP	LPC	548.362	548.371	[M+H]+	C28H55NO7P	A	5210400	2668100	5048500	3697700	5887900	7397900	225350000	188050000	213510000	198020000	149770000	221610000	1209700	5078500	7581100	7269700	7201600	6639800	42738000	32151000	53684000	32255000	61264000	5304400	22093000	31951000	35940000	22109000	30814000	26872000	6868800	10121000	8757500	9301400	7054200	4944700	2654800	2594900	3348600	2184100	3201300
MEDP1331	LysoPC 20:3(2n isomer)	GP	LPC	546.346	546.355	[M+H]+	C28H53NO7P	B	32371000	19679000	21900000	14958000	29355000	29361000	9	9	9	9	9	9	9	9	9	9	9	9	158880000	163160000	151350000	155630000	138200000	9	27947000	21504000	40302000	33626000	29509000	19021000	9	9	9	9	9	9	7795800	6990400	6682000	6183300	6390000
MEDP1332	LysoPC 20:3	GP	LPC	546.346	546.355	[M+H]+	C28H53NO7P	B	32371000	19679000	21900000	14958000	29355000	29361000	9	9	9	9	9	9	9	9	9	9	9	9	158880000	163160000	151350000	155630000	138200000	9	27947000	21504000	40302000	33626000	29509000	19021000	9	9	9	9	9	9	7795800	6990400	6682000	6183300	6390000
MEDP1333	LysoPC 20:4(2n isomer)	GP	LPC	544.331	544.331	[M+H]+	C28H51NO7P	A	16255000	6733000	8163800	6181200	10789000	11690000	217840000	255790000	223280000	257770000	224070000	228850000	81210	123780	152030	157830	156770	965650	211960000	214430000	215320000	216310000	214230000	266150	9	9	9	9	9	9	390510	3171100	563270	171650	158810	126530	113120	103890	110250	285930	230670
MEDP1334	LysoPC 20:4	GP	LPC	544.331	544.331	[M+H]+	C28H51NO7P	A	16255000	6733000	8163800	6181200	10789000	11690000	217840000	255790000	223280000	257770000	224070000	228850000	81210	123780	152030	157830	156770	965650	211960000	214430000	215320000	216310000	214230000	266150	9	9	9	9	9	9	390510	3171100	563270	171650	158810	126530	113120	103890	110250	285930	230670
MEDP1335	LysoPC 20:5	GP	LPC	542.316	542.316	[M+H]+	C28H49NO7P	A	219480000	154940000	178580000	154260000	202310000	218290000	261270000	275710000	264010000	264370000	244780000	264040000	42200	58957	109400	140700	88830	105550	245090000	242690000	266100000	268140000	256720000	331910	149310	155040	733860	258800	170060	132500	314410	9268800	717650	142720	134590	104910	217860	205780	193160	483850	387370
MEDP1336	LysoPC 20:5(2n isomer)	GP	LPC	542.316	542.316	[M+H]+	C28H49NO7P	A	205540000	158300000	173220000	150800000	197120000	210850000	239560000	260190000	243960000	246080000	227830000	244490000	60432	60589	119380	143030	95879	96799	238030000	232560000	256010000	255660000	246850000	309900	150580	171230	761200	218810	179080	118340	358660	9366500	653650	131400	130460	96578	225680	218370	187690	469610	370190
MEDP1337	LysoPC 18:0(2n isomer)	GP	LPC	524.363	524.371	[M+H]+	C26H55NO7P	A	93548000	78589000	69645000	57613000	90607000	95873000	359870000	344600000	331810000	299940000	202760000	330900000	81477000	90109000	93231000	98329000	113880000	99218000	18335000	14304000	33225000	12356000	40208000	95365000	128430000	93201000	113520000	152600000	70142000	82437000	304750000	264910000	280670000	220290000	259830000	323420000	46422000	35584000	44704000	36902000	34738000
MEDP1339	LysoPC 18:1(2n isomer)	GP	LPC	522.347	522.355	[M+H]+	C26H53NO7P	A	131900000	229410000	118450000	107560000	112300000	154470000	260150000	253180000	255630000	240560000	224720000	228660000	245980000	309470000	288880000	322430000	304450000	290450000	126160000	126050000	139240000	242040000	140140000	286110000	136940000	149600000	165400000	140820000	140630000	119950000	239770000	301780000	262150000	310930000	225720000	265330000	295230000	302990000	301420000	297730000	305790000
MEDP1341	LysoPC 18:2(2n isomer1)	GP	LPC	520.33	520.34	[M+H]+	C26H51NO7P	A	243510000	238970000	240890000	232610000	264070000	255910000	189240000	227110000	210570000	227540000	223850000	228280000	307790000	116610000	147080000	153840000	172670000	148840000	118290000	128090000	138120000	121790000	150090000	122410000	157900000	140490000	154700000	156890000	154350000	146720000	325660000	324940000	314560000	318030000	311660000	309030000	250860000	283450000	259240000	273820000	241020000
MEDP1343	LysoPC 18:3(2n isomer3)	GP	LPC	519.332	518.324	[M+H]+	C26H49NO7P	B	369230	312470	168150	85389	185950	314430	1700500	1681600	617710	1176600	1055800	1013100	682740	1301700	1533300	2536100	1674000	1673400	689650	599950	245020	570950	531620	1359200	483580	634190	350640	639140	633000	631760	889000	670770	726670	905880	1205000	362890	882070	554360	548750	1307400	482050
MEDP1345	LysoPC 18:3(2n isomer2)	GP	LPC	518.316	518.324	[M+H]+	C26H49NO7P	A	85565000	56589000	79442000	70505000	85614000	116110000	141910000	47359000	61652000	68326000	64054000	67258000	286640000	32724000	29450000	33383000	33358000	30683000	85721000	94738000	117610000	82963000	124760000	40433000	196090000	194230000	198140000	202390000	195780000	176860000	47623000	40271000	41623000	38756000	49134000	45840000	19786000	19396000	21507000	14762000	21101000
MEDP1346	LysoPC 16:0(2n isomer)	GP	LPC	496.331	496.34	[M+H]+	C24H51NO7P	A	275580000	280470000	286550000	289120000	279650000	264700000	193350000	211270000	200120000	225660000	242680000	201150000	147370000	245080000	264140000	276680000	261240000	255500000	260290000	261110000	234520000	280790000	225410000	234560000	282280000	268710000	279770000	286950000	273260000	269490000	78484000	76252000	73290000	58646000	72705000	83776000	202900000	197440000	199730000	189670000	206140000
MEDP1348	LysoPC 16:1(2n isomer)	GP	LPC	494.315	494.324	[M+H]+	C24H49NO7P	A	18569000	9189200	13801000	10982000	16545000	26911000	119210000	103440000	94126000	84379000	66433000	101000000	4250500	17642000	26274000	26760000	21625000	25772000	13193000	11101000	15604000	10026000	17904000	20002000	65072000	70512000	84312000	71587000	89088000	84251000	235590000	256600000	237280000	270990000	242200000	219930000	1810400	1582000	1701700	1698000	1881200
MWC10137321	1-(1Z-Hexadecenyl)-sn-glycero-3-phosphocholine	GP	LPC	502.326	479.338	[M+Na]+	C24H50NO6P	B	9	9	9	9	9	9	800450	1691200	662940	750030	1237900	933310	9	9	9	9	9	9	9	9	9	9	9	9	9	9	9	9	9	9	2559400	3792700	2481300	3149000	3540200	1392800	9	9	9	9	9
MWC10137325	1-(1Z-Octadecenyl)-sn-glycero-3-phosphocholine	GP	LPC	508.372	507.369	[M+H]+	C26H54NO6P	A	9	9	9	9	9	9	4718800	6761800	3663100	3016900	5521700	3756800	64685	55166	43558	67112	70173	75674	67321	64354	74512	76643	74945	63931	9	9	9	9	9	9	9547700	11769000	12765000	19706000	11036000	7567500	37542	38302	54523	105780	33808
MWC10127561	1,2-bis(heptanoylthio) Glycerophosphocholine	GP	LPC	514.235	513.235	[M+H]+	C22H44NO6PS2	B	9	9	9	9	9	9	34914	20829	27488	31689	25816	30373	9	9	9	9	9	9	9	9	9	9	9	9	9	9	9	9	9	9	10843	17522	13835	26268	9508.3	8457.9	9	9	9	9	9
MWC10144175	1,2-Dihexadecanoyl-sn-glycero-3-phosphate	GP	LPC	669.446	648.473	[M+Na-2H]-	C35H69O8P	B	9	4805.5	2195.4	4303.8	3617.6	1940.5	9	9	9	9	9	9	4639	3214.9	2698.6	4552.2	2613.3	1942	5135.6	8091.2	3618.8	5561.9	5398.2	1560.8	3544	3905.8	6544.6	6588	6958.1	3202.9	1094.1	2361.6	1055	466.02	2949.7	2020.2	6579.5	4432.8	4302.6	3710.3	3797.8
MWC10144612	1,2-Dipalmitoleoyl-sn-glycero-3-phosphocholine	GP	LPC	752.51	729.531	[M+Na]+	C40H76NO8P	B	224400	198960	127820	93979	226490	134030	3755900	143540	183570	61694	57003	59949	156500	157420	94764	195940	138200	133910	75297	228260	141770	109100	102970	113200	160750	253290	93536	170040	94814	177620	173540	214710	86205	86520	56209	53193	197750	252400	132430	212300	372630
MWC10137336	1-Lignoceroyl-2-hydroxy-sn-glycero-3-phosphocholine	GP	LPC	649.491	607.458	[M+CH3CN+H]+	C32H66NO7P	B	38371	30849	34247	28692	21915	47627	38216	39092	46576	16909	62118	45540	13075	25391	18318	19567	26707	21327	27209	23475	42353	18132	32086	18745	44022	45151	33357	25639	20996	28241	43781	58606	59894	77572	65758	56795	32732	29396	18700	30357	27546
MWC10137350	1-Oleoyl-2-myristoyl-sn-glycero-3-phosphocholine	GP	LPC	754.542	731.547	[M+Na]+	C40H78NO8P	B	4832.9	1592	1760	3387.7	3400.6	9195.2	28435	40845	19629	26444	21869	21244	110900	216560	206730	384770	263820	242790	9	3885.8	5018.6	3687.9	6104.7	171230	37770	122580	101070	61806	59523	62903	92421	116530	108650	130400	81728	80462	9	9	9	9	9
MWC10144187	1-Palmitoyl-2-docosahexaenoyl-sn-glycero-3-phosphocholine	GP	LPC	844.524	805.562	[M+K]+	C46H80NO8P	B	17614	18603	13300	17469	16770	9242	9	9	9	9	9	9	3048.2	12330	14749	11884	16271	5731.6	9329.8	9	5638.4	3409.6	4797	15310	9862.2	9793.3	12739	10677	9147.7	8645.9	9	9	9	9	9	9	7070.3	3177.1	6802.3	5965	3434.3
MWC10128314	Azelaoyl PAF	GP	Glycerophospholipids	674.437	651.448	[M+Na]+	C33H66NO9P	B	110010	108820	106930	57115	134980	171000	1207900	964060	1732500	1954900	408120	3489100	517820	451660	183020	121750	373540	343650	9	9	9	9	9	9	848240	1524600	954190	1148900	794440	667380	89203	73473	126890	90827	146500	111420	1394800	1306800	1218300	1158700	1257800
MWC10005508	beta-Alanyl-L-arginine	GP	PC	280.119	245.149	[M+Cl]-	C9H19N5O3	B	168600	194750	208310	232250	154280	355250	684680	566280	713940	657270	646000	619480	76332	64056	66338	42839	127320	175470	735600	578320	694000	434160	687010	138720	3128100	4397300	3607800	3426300	3618000	1802600	3483200	4770600	3793800	4358900	4141900	4580200	1889300	1568100	1131500	1211400	1429600
MWC10127661	Eicosapentaenoyl PAF C-16	GP	Glycerophospholipids	810.521	765.567	[M-H+2Na]+	C44H80NO7P	B	9	9	9	9	9	9	9	9	9	9	9	9	9	9	9	9	9	9	9	9	9	9	9	9	9	9	9	9	9	9	9	9	9	9	9	9	9	9	9	9	9
MWC10150788	Homocarnosine	GP	PC	307.083	240.122	[M-2H+3Na]+	C10H16N4O3	A	26871	34900	36607	17254	15313	25531	2966500	2308600	1004100	1196500	885450	1990500	39543	15715	46403	45896	32013	47983	39772	25736	19158	9	25951	22231	2591800	12123000	7698300	2615500	16768000	7014600	54853	55536	42016	17966	51811	29078	9	9	9	9	9
MWC10142952	L-Anserine	GP	PC	259.121	240.122	[M+F]-	C10H16N4O3	A	9	9	9	9	9	9	1058700	1822700	1701700	1788500	1937800	1533000	134800	117400	109030	79523	127680	163390	805670	587810	685280	630820	578100	154520	5317000	4892000	4705700	4544700	3808700	2816300	743830	1054600	997590	728120	715060	1120200	170850	95269	177620	83618	108190
MWC10137731	LPA 18:1	GP	Glycerophospholipids	435.248	436.259	[M-H]-	C21H41O7P	A	2356600	1160600	1728500	1310400	2008800	3032300	1139800	940700	1184300	1038600	523950	1162200	153420	311710	349250	333080	366970	335820	2762600	2796900	3946700	2256600	5013700	382100	443450	609090	609100	582360	538710	427770	3662500	4462400	3612700	4787200	3721000	3041100	195200	175400	189550	175900	198760
MWC10137732	LPA 18:2	GP	Glycerophospholipids	433.236	434.243	[M-H]-	C21H39O7P	B	1663400	1514700	1649700	1105700	1798600	1822800	9	9	9	9	9	9	1111100	2083800	2148700	2003400	2222000	2330300	1661700	1696700	1689600	1548800	1890500	2074600	2986600	3044700	3079200	3161600	2401100	3429400	646980	750750	770080	819480	640110	560040	1063700	981780	1115600	978840	1271000
MWC10137733	LPA 18:3	GP	Glycerophospholipids	431.219	432.228	[M-H]-	C21H37O7P	A	67486	61347	63241	66210	83480	89517	361930	434930	376140	445620	431170	436990	774870	1362500	1305300	1473400	1425800	1462600	72636	72255	86077	80163	102100	1509600	422620	844740	693780	540700	486500	509190	615100	726530	704270	811750	645630	604230	21919	18412	12174	9	21082
MWC10013729	Lyso-PAF C-16	GP	Glycerophospholipids	482.358	481.353	[M+H]+	C24H52NO6P	B	7302200	5542200	7673500	6638000	7657300	9794700	22787000	22396000	22391000	21013000	20048000	21865000	1303600	1522500	2071400	1939200	2059600	2104600	5171600	4619000	5867400	4358600	6558000	1678400	16780000	21916000	20551000	17294000	18678000	17153000	29935000	29501000	28763000	29619000	29931000	28158000	2610300	2553400	2658800	2389600	2981900
MWC10064146	LysoPE(14:1(9Z)/0:0)	GP	Glycerophospholipids	424.246	423.239	[M+H]+	C19H38NO7P	A	11027	16991	37750	25251	18035	69770	126900	144380	90459	58870	42768	323700	6927.1	24145	50407	27382	33865	52016	124080	191900	150130	182780	200220	30393	143020	158420	191270	143550	446320	243810	1518900	1667100	1482200	2388100	1632000	1396700	30949	12833	25277	13097	47526
MWC10064147	LysoPE(15:0/0:0)	GP	Glycerophospholipids	440.274	439.27	[M+H]+	C20H42NO7P	B	9	9	9	9	9	9	1550000	771000	1375900	1191000	1779600	1435400	9	9	9	9	9	9	9	9	9	9	9	9	52724	116450	86624	58379	50747	90308	62568	81447	56603	87461	71463	57317	9	9	9	9	9
MWC10127581	Methylcarbamyl PAF C-16	GP	Glycerophospholipids	580.409	538.375	[M+CH3CN+H]+	C26H55N2O7P	B	47754	60295	29402	63280	54270	76813	9	9	9	9	9	9	17462	63065	59280	69178	58170	47055	56599	60391	49799	64468	47145	48236	57374	50496	49279	61579	63922	51874	9	9	9	9	9	9	32557	44158	38050	29367	40494
MWC10128127	PA(14:0/0:0)	GP	Glycerophospholipids	381.203	382.212	[M-H]-	C17H35O7P	B	145500	112150	147300	154580	168490	236910	9	9	9	9	9	9	32105	78482	80264	89963	73761	71143	64501	79356	105230	75766	106470	112240	67043	62655	62057	69478	76087	84682	390190	404230	388380	480640	388010	324160	36749	34230	30138	18461	18051
MWC10127650	PAz-PC	GP	PC	666.434	665.427	[M+H]+	C33H64NO10P	A	283770	226610	111420	143490	267890	278330	334730	399890	509250	480690	213010	515280	2796600	1379800	322020	193450	685220	273190	9	9	9	9	9	9	114590	108520	139190	138860	132310	111170	648590	335150	422780	272690	562990	510920	1305100	1140000	788960	988180	1144700
MWC10064075	PC(18:3(6Z,9Z,12Z)/18:3(6Z,9Z,12Z))	GP	PC	778.534	777.531	[M+H]+	C44H76NO8P	A	22791	14782	14804	21888	25122	25354	23442	16026	25368	30522	18999	15282	3466.8	4651.4	6598.4	8237.7	3920.2	3137	26730	21856	26912	28982	35990	6958.2	11679	31541	19889	12738	16893	15340	9	9	9	9	9	9	9	9	9	9	9
MWC10128188	PE(14:0/0:0)	GP	PE	426.262	425.254	[M+H]+	C19H40NO7P	A	860830	796980	1303100	1177000	1041600	2101000	4709200	3072600	1963700	1725500	1878800	2601900	281540	1093700	1259100	1033500	1127800	1331900	840260	957320	918280	852860	1087800	1106700	1313400	6519600	3238400	1691500	1845100	2396000	5872200	6444400	6218100	7081200	5783300	4905600	653190	659120	549120	721650	828940
MWC10128235	PE(17:0/0:0)	GP	PE	468.308	467.301	[M+H]+	C22H46NO7P	B	38826	29187	22148	31700	30402	28449	2165500	2298200	1478300	1432800	1006200	1691500	107310	97767	101310	97657	144940	112390	24157	21314	31209	16838	41474	116610	131600	132970	120260	142250	93420	77561	1215700	1459300	1471000	2015500	1310000	898550	117490	114850	122330	131850	117700
MWC10128230	PE(17:1(9Z)/0:0)	GP	PE	466.295	465.286	[M+H]+	C22H44NO7P	A	26149	17552	22036	23834	23350	17439	278550	221810	202830	183030	174910	339200	9	29147	36199	23994	28072	26239	20651	24815	32014	15669	24641	21450	62768	111830	89434	64893	87710	63367	90271	115350	126200	157850	160600	108880	9	9	9	9	9
MWC10128251	PE(19:1(9Z)/0:0)	GP	PE	494.324	493.317	[M+H]+	C24H48NO7P	B	9	9	9	9	9	9	11177000	15683000	10684000	7196400	12429000	9185200	9	9	9	9	9	9	9	9	9	9	9	9	9	9	9	9	9	9	9	9	9	9	9	9	9	9	9	9	9
MWC10128244	PG(16:1(9Z)/0:0)	GP	Glycerophospholipids	483.27	482.264	[M+H]+	C22H43O9P	B	1762600	932090	1057900	919580	1329500	1876000	3278900	2961500	3379900	3764600	2183700	3794700	236580	570840	619750	750020	651170	593120	2863800	2773500	4471900	2399400	4700000	586560	9	9	9	9	9	9	1688500	1899600	1719600	2338300	1815400	1213500	271570	290200	305800	239400	275100
MWC10127621	PGPC	GP	Glycerophospholipids	608.354	609.364	[M-H]-	C29H56NO10P	B	46546	45034	49390	53584	54913	66793	54218	59953	60864	56670	35776	46326	11874	30725	37223	50821	40377	42589	59501	60213	84820	55564	82724	43559	39155	32130	40636	30679	31091	32513	64279	63517	70315	65876	61953	59484	15819	16782	15797	11621	17682
MWC10127611	POV-PC	GP	Glycerophospholipids	558.353	593.369	[M+H-2H2O]+	C29H56NO9P	A	9	9	9	9	9	9	10393000	5011100	6777200	4522800	8015100	5727100	9	9	9	9	9	9	9	9	9	9	9	9	9	9	9	9	9	9	9	9	9	9	9	9	9	9	9	9	9
MWC10128274	PS(18:1(9Z)/0:0)	GP	PS	524.294	523.291	[M+H]+	C24H46NO9P	B	802890	663670	745200	726560	869940	914700	1861000	1280100	1369500	1541000	1579800	1742600	423830	1207900	1369200	1247700	1290900	1495600	968220	930320	957130	960540	1093400	1162400	2065000	3016300	2526900	2359600	2228800	2303300	9	9	9	9	9	9	629860	492610	545540	533250	746090
MEDN0098	2-Picolinic Acid	Heterocyclic compounds	Pyridine and pyridine derivatives	122.024	123.032	[M-H]-	C6H5NO2	A	187580	380220	256220	194710	218070	197140	735490	1469300	1071200	608540	736150	936250	200040	106070	66627	93297	116120	89459	298140	291790	394670	400780	416910	60202	1853900	809080	1100800	1856500	1033400	985950	131800	202530	145830	140750	201670	164040	288130	323990	474950	361490	291280
MEDN0100	6-Hydroxynicotinic Acid	Heterocyclic compounds	Pyridine and pyridine derivatives	138.019	139.027	[M-H]-	C6H5NO3	A	9	9	9	9	9	9	9	9	9	9	9	9	9	9	9	9	9	9	9	9	9	9	9	9	9	9	9	9	9	9	445430	342180	237250	309510	414170	372990	9	9	9	9	9
MEDN0195	Pyridoxal 5'-Phosphate	Heterocyclic compounds	Pyridine and pyridine derivatives	246.017	247.025	[M-H]-	C8H10NO6P	A	312610	204380	148680	196210	199350	303300	703980	655170	699380	728170	831490	589560	617620	498810	493850	523600	601300	500260	602050	649630	558480	658070	648130	586380	141320	137390	197360	91142	242450	178210	712060	621630	597490	404630	646820	721600	473580	583330	324740	403180	432470
MEDN0266	Indole-3-Carboxaldehyde	Heterocyclic compounds	Indole and Its derivatives	144.045	145.053	[M-H]-	C9H7NO	A	9	9	9	9	9	9	41076	22026	38281	18383	19032	9	9	9	9	9	9	9	138490	90452	83382	77877	127280	9	60521	75377	32923	42588	23374	15631	13136	9	28194	18667	19821	24694	9	9	9	9	9
MEDN0412	Biopterin	Heterocyclic compounds	Pteridines and derivatives	236.078	237.086	[M-H]-	C9H11N5O3	A	105570	128080	174480	143230	156630	135960	2044400	1778900	3035000	2615500	2631700	3146700	1121800	1100100	883270	826670	1297800	1193300	424960	279960	330790	336180	332580	1106700	5610100	7910900	7280700	6843600	6601200	7007400	2135400	2106500	3126900	2487800	2627000	2240100	1232300	1221000	1201900	1068000	791970
MEDN0414	4-(Aminomethyl)-5-(Hydroxymethyl)-2-Methylpyridin-3-Ol	Heterocyclic compounds	Pyridine and pyridine derivatives	167.082	168.09	[M-H]-	C8H12N2O2	A	8773.4	10974	5709.7	6170.1	8838.1	13254	9	9	9	9	9	9	12304	10548	5294.6	7926	9651.5	3539.3	29268	27990	20626	32638	22869	11571	15741	20291	12345	14253	16763	25611	9	9	9	9	9	9	45032	18871	39921	23841	27442
MEDN0581	Imidazoleacetic acid	Heterocyclic compounds	Indole and Its derivatives	125.035	126.043	[M-H]-	C5H6N2O2	A	9	9	9	9	9	9	49641	302780	265630	132360	300790	168330	536260	374740	317410	253670	312090	952160	9	9	9891.8	9	9	383830	97269	26655	69396	36140	73896	62169	28941	31990	46827	37862	27597	17024	99955	119090	78092	136260	216970
MEDN0621	Indoxylsulfuric acid	Heterocyclic compounds	Indole and Its derivatives	212.002	213.01	[M-H]-	C8H7NO4S	A	9	9	9	9	9	9	9	9	9	9	9	9	9	9	9	9	9	9	90805	141890	139420	100680	118320	9	9	9	9	9	9	9	9	9	9	9	9	9	9	9	9	9	9
MEDN0656	Indoleacetaldehyde	Heterocyclic compounds	Indole and Its derivatives	158.061	159.068	[M-H]-	C10H9NO	A	12244000	13576000	12145000	13347000	12287000	13351000	2728500	2572700	4600700	2385500	3258300	2883400	5571400	6434300	5280300	5892300	5267700	5315700	12543000	12141000	12610000	11823000	11427000	6204900	4781900	6429500	3771500	4938500	5600400	2838500	9405800	9298100	9633000	9367700	10491000	9975300	15770000	15385000	14301000	14928000	14849000
MEDN1022	5,6-Dimethylbenzimidazole	Heterocyclic compounds	Heterocyclic compounds	145.077	146.084	[M-H]-	C9H10N2	A	2447000	2954400	2468800	2835700	2741500	2873800	625430	648210	1185300	577150	682300	579970	1806500	1543500	1532900	1448700	1244900	1307800	2817400	3093200	3196800	2646300	3044600	1729200	1036700	1183600	730100	1158500	1085000	538400	2305700	2577100	2535500	2432800	2735000	2499100	3317500	3332400	3214100	3629100	3293900
MEDN1024	D-piperidine acid	Heterocyclic compounds	Heterocyclic compounds	128.071	129.079	[M-H]-	C6H11NO2	A	65660	90679	72220	52641	94505	112710	198520	167000	225030	159890	165230	173410	70815	141760	78165	126160	90305	107700	113130	121620	115570	96086	107240	120570	48317	42290	51554	34793	45562	40402	109220	111360	142030	100770	140130	153410	48066	29184	55176	37948	29336
MEDN1039	Indole-4-carboxaldehyde	Heterocyclic compounds	Indole and Its derivatives	144.045	145.053	[M-H]-	C9H7NO	B	9	9	9	9	9	9	41076	22026	38281	18383	19032	9	9	9	9	9	9	9	138490	90452	83382	77877	127280	9	60521	75377	32923	42588	23374	15631	13136	9	28194	18667	19821	24694	9	9	9	9	9
MEDN1090	Dioxindole	Heterocyclic compounds	Indole and Its derivatives	148.04	149.048	[M-H]-	C8H7NO2	A	107040	289480	189020	125200	133410	33159	92051	106410	59443	90723	131200	119290	104390	87663	109630	121730	9	71483	352920	358850	392560	300670	370360	84095	159460	118280	134570	155370	139970	110290	40658	84502	44901	47518	68207	70231	431080	341790	331650	469080	517430
MEDN1150	Indole-3-carboxylic acid	Heterocyclic compounds	Indole and Its derivatives	160.04	161.048	[M-H]-	C9H7NO2	B	9	9	9	9	9	9	2542500	2692200	2734300	3701200	2854200	2836400	5537800	4358300	4720500	4727200	5228000	5149900	9	9	9	9	9	5526200	10541	23898	26943	17754	33386	39249	774160	1157700	1021800	880490	1513900	1295000	9	9	9	9	9
MEDN1247	1-pyrroline-4-hydroxy-2-carboxylate	Heterocyclic compounds	Heterocyclic compounds	128.035	129.043	[M-H]-	C5H7NO3	B	142370	140120	161970	151200	164440	178270	241030	227370	288290	262130	283240	329480	91413	100160	146640	114620	150970	198000	209010	243030	223430	181710	219330	262420	56247	87854	84696	60621	73246	104130	176180	180060	161450	167900	193240	186470	75077	86074	78848	51728	44156
MEDP0115	1,4-Dihydro-1-Methyl-4-Oxo-3-Pyridinecarboxamide	Heterocyclic compounds	Pyridine and pyridine derivatives	153.06	152.059	[M+H]+	C7H8N2O2	A	797710	2934200	1179400	735990	1424800	529780	446260	431910	874700	356700	409930	492730	125450	115250	65517	146170	138410	126740	938700	1067600	879740	1363800	978720	135080	4439900	4085300	3667200	5129700	3744200	3931200	987330	801260	1058100	1113500	1344900	1180300	741270	974790	764860	580380	514090
MEDP0118	4-Pyridoxic Acid	Heterocyclic compounds	Pyridine and pyridine derivatives	184.05	183.053	[M+H]+	C8H9NO4	B	183170	182270	262270	481700	323520	282710	11220	9927.7	61775	12607	9	19976	32040	31148	44468	49129	41534	97395	26538	43359	19065	25994	51934	34882	307350	321100	176930	234480	242880	194200	9	9	9	9	9	9	56507	87344	91076	38174	29164
MEDP0275	Indole-3-Acetic Acid	Heterocyclic compounds	Indole and Its derivatives	176.1	175.063	[M+H]+	C10H9NO2	A	22044000	23949000	20190000	23198000	21462000	21917000	3580000	3644400	6572400	2977800	4089100	3640100	9921200	11357000	9062500	9693100	9105700	9152300	20672000	20741000	22963000	17576000	19811000	11385000	5255000	8032600	3874700	7045600	7581300	2707700	14203000	13496000	14534000	14579000	15808000	15704000	24417000	26014000	22890000	24628000	29096000
MEDP0277	Methyl Indole-3-Acetate	Heterocyclic compounds	Indole and Its derivatives	190.1	189.079	[M+H]+	C11H11NO2	A	9	9	34289	9	43525	9	78488	133280	155760	76266	48972	78987	9	9	9	9	9	9	2026400	2127000	2694600	2112400	2798400	9	963000	526030	1258300	1069700	867000	1179300	42488	34441	47049	38127	50617	63799	9	9	9	9	9
MEDP0362	Neopterin	Heterocyclic compounds	Pteridines and derivatives	254.08	253.081	[M+H]+	C9H11N5O4	A	9	9	9	9	9	9	12010	10768	19838	15469	25799	20111	9	9	9	9	9	9	9	9	9	9	9	9	168010	282160	291350	176100	192690	313390	19436	11247	24391	31626	32397	32334	9	9	9	9	9
MEDP0365	Cotinine N-Oxide	Heterocyclic compounds	Heterocyclic compounds	193.09	192.09	[M+H]+	C10H12N2O2	B	9	9	9	9	9	9	9	9	9	9	9	9	9	9	9	9	9	9	9	9	9	9	9	9	621720	899800	704730	588410	699650	792540	9	9	9	9	9	9	9	9	9	9	9
MEDP0384	Isoxanthopterin	Heterocyclic compounds	Pteridines and derivatives	180.04	179.044	[M+H]+	C6H5N5O2	A	100130	86371	125620	82945	65271	103780	4691500	2797400	4571200	5076500	4258500	5122500	10175000	8076000	7559800	8473300	9934400	8133800	1496500	1399400	1492700	1631500	1331200	8418900	50817000	61015000	55942000	43766000	51096000	50915000	5472600	5576400	7038900	5191300	7160600	9104500	559700	558060	632310	383650	462680
MEDP0385	L-Sepiapterin	Heterocyclic compounds	Pteridines and derivatives	238.09	237.086	[M+H]+	C9H11N5O3	A	9	9	9	9	9	9	13082	31686	31094	11598	15791	71926	8490.9	14975	17599	8436.7	24429	13977	9	9	9	9	9	9	33943000	50171000	37507000	27059000	35389000	30281000	21879	13037	27455	26437	26063	16538	9	9	9	9	9
MEDP0443	10-Formyl-Thf	Heterocyclic compounds	Pteridines and derivatives	474.2	473.166	[M+H]+	C20H23N7O7	B	2764100	951770	2524800	2208400	2190800	2746800	259340	59300	203770	9	84389	114270	519820	1493400	1816200	2328600	3563000	5093200	54738	44626	95742	36351	54150	2117100	73301	65784	218740	148090	72236	125400	52422	43900	43353	51473	45184	65580	278040	574060	552100	176580	362570
MEDP0453	Indole	Heterocyclic compounds	Indole and Its derivatives	118	117.058	[M+H]+	C8H7N	B	26724000	31586000	23775000	28169000	24534000	26978000	7062700	7080200	9798300	6691800	7967200	7435400	12684000	13700000	12382000	13110000	13217000	12686000	25084000	25074000	26061000	25572000	22767000	13820000	10551000	13032000	8905800	10285000	11917000	7288700	18439000	17079000	18025000	17480000	19734000	18339000	42200000	37361000	31051000	36596000	33062000
MEDP0529	Indole-3-acetamide	Heterocyclic compounds	Indole and Its derivatives	175.079	174.079	[M+H]+	C10H10N2O	A	2537500	2267100	1877400	1965800	1982600	2685300	2628100	2447600	2326200	2536800	2845900	2387400	1306100	820380	358590	547120	882280	787600	1322200	1539000	1453200	1402900	1170800	574990	848000	1402600	1133600	613810	1152100	989970	516680	583760	485700	584090	561030	496580	1147300	694590	957130	1012800	760790
MEDP0540	7,8-dihydro-L-Biopterin	Heterocyclic compounds	Pteridines and derivatives	240.102	239.102	[M+H]+	C9H13N5O3	A	29315	72631	91956	72122	56920	37501	118980	112960	139930	75761	101110	107080	132480	78396	60591	65583	99692	104140	129970	155630	113900	69500	109750	137040	437400	296290	164740	212900	194620	224180	76250	122550	115260	109190	172520	143850	354580	210210	202360	130010	97986
MEDP0545	2-Pyrrolidinone	Heterocyclic compounds	Heterocyclic compounds	86.0528	85.0528	[M+H]+	C4H7NO	B	258280	365420	185240	227340	224760	362380	34024000	24761000	12145000	11410000	16222000	13066000	14477000	15144000	8162700	11955000	15886000	14598000	286530	317160	370060	208510	353630	14732000	387660	534970	379470	527560	521120	383250	85199000	75691000	96178000	87492000	77929000	85501000	768790	880580	942330	943050	711570
MEDP0584	Pterine	Heterocyclic compounds	Pteridines and derivatives	164.049	163.049	[M+H]+	C6H5N5O	A	57221	37846	21783	81350	83265	78488	109790	84193	77472	89571	28885	54477	18626	35387	19531	24097	19631	28016	169000	156560	172800	137870	91233	60848	124370	125190	83506	111080	189220	149520	36637	28047	23962	71195	26133	34741	172460	138260	125100	183240	176670
MEDP0683	succinylsulfathiazole	Heterocyclic compounds	Sulfanilamides	356.1	355.03	[M+H]+	C13H13N3O5S2	B	9	9	9	9	9	9	9	9	9	9	9	9	28194	61463	26055	19532	51304	39868	5716.7	6059	5303.2	11368	12530	27166	9	9	9	9	9	574010	9	9	9	9	9	9	9	9	9	9	9
MEDP0715	2-Methylfuran	Heterocyclic compounds	Heterocyclic compounds	83	82.0419	[M+H]+	C5H6O	B	9	9	9	9	9	9	9	9	9	9	9	9	9	9	9	9	9	9	9	9	9	9	9	9	9	9	9	9	9	9	688400	502620	958030	816760	918720	754770	9	9	9	9	9
MEDP0729	Barbituric acid	Heterocyclic compounds	Heterocyclic compounds	129	128.022	[M+H]+	C4H4N2O3	B	1642100	1536400	1543900	1530500	1581400	1675600	1698300	1953900	1713100	2186400	1804200	2077200	2114600	2184500	2537400	2062600	2807700	1907400	2150000	1968100	1896600	1924900	1655000	1513700	3676500	2894800	3618000	3602800	3885200	3715900	2939800	2563700	2252500	3009500	2641000	2391300	2363200	2353300	1951000	2260900	2528900
MEDP0792	PYRROLIDINE	Heterocyclic compounds	Heterocyclic compounds	72.3	71.0735	[M+H]+	C4H9N	B	1547200	1715200	1782200	2151100	2508200	1888200	2164200	1668400	2764200	1368300	2189000	2113100	1419100	2692100	1135500	2555600	2098200	1105400	3269800	4327300	5158700	3665000	3777700	3168300	4114300	4693200	4633500	3339100	5277100	6302700	463320	445230	531860	766230	485570	475460	4301500	4113900	3198400	3637400	3853300
MEDP0821	6-Methylnicotinamide	Heterocyclic compounds	Pyridine and pyridine derivatives	137.1	136.064	[M+H]+	C7H8N2O	A	18256000	14967000	10863000	7450900	14727000	8903000	121010000	100830000	108710000	106930000	70327000	81857000	4765400	7472200	4553800	7016800	7948100	5771900	19325000	20449000	17238000	23829000	20903000	7514900	9884500	9097800	12100000	8725200	12210000	8940000	13540000	14823000	17319000	17523000	18668000	17216000	5641100	7786300	8049800	6677200	5923100
MEDP0882	Thiamine Monophosphate	Heterocyclic compounds	Heterocyclic compounds	345	345.079	[M]+	C12H18N4O4PS	A	33543	74203	80053	65231	16887	60866	99813	251660	150860	131080	106200	228040	35528	39715	21251	17465	40466	39346	838560	681520	447560	720240	421320	19871	1072500	1155700	1072300	1106800	906350	937360	117380	146040	107360	140210	109680	134550	19210	9536.6	17930	13782	8635.8
MEDP0883	2,4-Dihydroxypteridine	Heterocyclic compounds	Pteridines and derivatives	165.3	164.033	[M+H]+	C6H4N4O2	A	375760	483310	383240	606100	572500	531480	243760	187470	156900	111990	171480	169920	226400	392320	181100	248160	264240	241920	819560	843980	1089900	823350	545280	308110	380510	408580	270670	234160	304680	435580	52321	36574	58664	49401	89837	81169	1405100	1160900	792450	1203200	1421700
MEDP0898	Pyridoxal	Heterocyclic compounds	Pyridine and pyridine derivatives	168.3	167.058	[M+H]+	C8H9NO3	A	24852000	28344000	27055000	26264000	22057000	28596000	787000	1138200	1001900	1012400	1113900	1223300	668150	417990	456520	422250	554520	430580	507390	358880	405900	344620	432840	401480	144910	242810	373960	188250	390120	341160	536710	967590	574460	768250	1038000	770600	536450	576080	440670	310150	344010
MEDP1063	Indole-5-carboxylic acid	Heterocyclic compounds	Indole and Its derivatives	162.045	161.048	[M+H]+	C9H7NO2	A	9	9	9	9	9	9	38626	22170	27908	27490	22656	36477	1143900	1307000	2081100	1483300	1139500	1312600	258280	322210	315660	369810	320680	1452400	9	9	9	9	9	9	303560	254830	583390	501980	457750	320070	9	9	9	9	9
MEDP1090	Thiazole	Heterocyclic compounds	Heterocyclic compounds	86.0047	84.9986	[M+H]+	C3H3NS	A	381660	155580	198860	233340	278330	430110	16740	24277	113100	35872	34303	15733	69920	114280	87630	77780	72928	80667	85636	97178	98672	91433	143060	130570	31405	19892	49639	58714	14964	35301	292030	122290	356260	312250	179870	216940	180580	160920	166100	167640	97339
MEDP1127	1-acetylindole	Heterocyclic compounds	Indole and Its derivatives	160.1	159.068	[M+H]+	C10H9NO	A	2795000	3379800	2551200	3119400	2854200	3325800	640320	738220	1238800	707670	845640	746720	1278800	1498400	1256400	1229100	1425500	1582100	3088100	2748100	2927100	2801900	2872500	1671600	1239900	1702100	1053000	1144900	1302500	740950	2124300	2096300	2159500	2276000	2480600	2563300	3690200	3226600	3440300	3376400	3426100
MEDP1472	1-Methyl-6-oxo-1,6-dihydropyridine-3-carboxamide	Heterocyclic compounds	Pyridine and pyridine derivatives	153	152.059	[M+H]+	C7H8N2O2	B	210640	367290	197230	166040	181090	137550	47691	50548	107970	57522	67922	108520	9	9	9	9	9	9	331080	389810	401830	424780	416420	9	456060	367320	358110	483250	396320	330190	252930	183260	268410	198630	299900	223890	109220	103270	170660	81281	100810
MWC10004474	(2S,3R)-2-Hydroxy-3-(indol-3-yl)butanoate;Indolmycenate	Heterocyclic compounds	Indole and Its derivatives	238.081	219.089	[M+F]-	C12H13NO3	B	2916900	2992300	2516000	2827600	2965000	2952100	1688000	2026600	2132800	2313400	2015300	1844200	2158600	1708900	1670700	1755500	1611800	1587600	2625200	2531200	2500000	2602400	2540800	1872900	2354400	2090000	2359900	2284500	2062400	2297800	2644900	2475900	2612000	2628400	2583300	2727700	2343400	2529200	2577600	2624600	2527100
MWC10002705	(Indol-3-yl)glycolaldehyde;3-Indoleglycolaldehyde	Heterocyclic compounds	Indole and Its derivatives	156.033	175.063	[M-H-H2O]-	C10H9NO2	B	1817500	1929800	1659700	1754400	1731300	1766200	1598600	1745700	1705100	1698300	1704900	1581600	1650700	1589500	1591800	1614800	1559800	1531500	1807500	1764400	1751700	1790900	1750200	1549300	1779300	1646000	1717000	1708400	1678800	1719200	1899400	1798500	1849200	1726500	1831600	1802500	1770700	1756900	1850000	1758800	1801500
MWC10149962	1-(3-Pyridyl)-1-butanone-4-carboxylic acid	Heterocyclic compounds	Pyridine and pyridine derivatives	162.055	179.058	[M+H-H2O]+	C9H9NO3	B	859230	813750	797200	809910	915410	968200	6151000	4928400	6676000	9249800	6773900	6867200	14413000	11959000	12700000	11860000	14495000	13646000	1010000	1000900	1174300	938310	1041700	14580000	339790	524390	310540	364440	424350	221960	2502800	3311400	2813900	2125400	3946600	3497900	1096500	1121000	974590	1175000	1179700
MWC10000282	1-Methylpyrrolinium	Heterocyclic compounds	Pyrrole and pyrrole derivatives	119.049	84.0813	[M+Cl]-	C5H10N	A	23286	20749	26464	21791	15555	17589	24892	27971	46161	36712	23853	35668	16092	21775	12684	8804.1	15578	13471	21760	20713	16615	24838	21825	18172	58439	48593	55067	43941	60819	68426	132980	125820	137480	139640	150120	126260	29083	26982	34176	34121	32491
MWC10001600	2,3-Dihydroxyindole;Dihydroxyindole	Heterocyclic compounds	Indole and Its derivatives	167.085	149.048	[M+NH4]+	C8H7NO2	B	849500	871880	833360	889560	865980	939080	809350	864020	812320	929720	845100	760010	1017000	1123300	1148500	1036600	881490	1028600	947890	885540	930810	893140	994090	1011600	1078900	994880	1063600	1044800	1025800	1005400	876120	894750	854660	890430	830160	873960	1113900	1135000	1131200	1145200	1113300
MWC10005902	2-Amino-4-hydroxy-6-(D-erythro-1,2,3-trihydroxypropyl)-7,8-dihydropteridine;Dihydroneopterin;7,8-Dihydroneopterin	Heterocyclic compounds	Pteridines and derivatives	307.089	255.097	[M+Cl+NH3]-	C9H13N5O4	B	17143	47977	47648	40244	39563	39868	11922	16361	21476	8920.9	16483	11997	14222	20467	9333.4	10851	7856.2	13554	5534.8	7300.7	8111.8	11072	12462	3590.5	33043	24122	31670	42562	29612	27726	5222.1	8904.4	5380.3	10284	13924	8297.1	5707.3	8028.1	19050	14607	10104
MWC10141907	2-Descarboxy-cyclo-dopa;Indoline-5,6-diol;5,6-Indolinediol	Heterocyclic compounds	Indole and Its derivatives	152.07	151.063	[M+H]+	C8H9NO2	B	9	9	9	9	9	9	139720	106240	157180	127830	200850	199540	9	9	9	9	9	9	944170	1276600	1315800	1195200	1210700	9	518720	505190	352710	450900	530550	495470	13863	46542	27793	9	32260	8555.2	654090	381090	270420	575480	836770
MWC10014088	2-Methyl-1-hydroxybutyl-ThPP	Heterocyclic compounds	Heterocyclic compounds	548.066	511.118	[M-2H+K]-	C17H29N4O8P2S	B	9	9	9	9	9	9	9	9	9	9	9	9	134750	155160	96075	75251	81535	66519	9	9	9	9	9	70964	9	9	9	9	9	9	9	9	9	9	9	9	9	9	9	9	9
MWC10000266	2-Methyl-1-Pyrroline	Heterocyclic compounds	Pyrrole and pyrrole derivatives	84.0802	83.0735	[M+H]+	C5H9N	B	4122100	4606300	3483300	3739800	4208800	4421100	3821600	3672400	4702900	2237500	3448800	4512000	3034600	2413400	1457700	2447900	2867100	3214900	3889700	3871700	4286800	4228200	3682600	2382000	2620400	6523300	1602800	1910100	5116800	1993200	6998400	7008900	6735500	7302400	8798600	6768100	4432800	4830500	3229800	4008700	3221500
MWC10139503	3-Methyldioxyindole;3-Hydroxy-3-methyloxindole	Heterocyclic compounds	Indole and Its derivatives	198.038	163.063	[M+Cl]-	C9H9NO2	A	591880	569800	527200	597050	578940	623660	498150	529310	529040	530680	517390	508540	586230	553830	604740	559380	603940	537120	626600	600120	592280	594300	568590	601190	634980	612420	604890	592520	599100	599920	583720	634530	597650	589210	586280	610210	513470	541940	548930	503220	557670
MWC10139094	4-Imidazolone-5-propanoate;4-Imidazolone-5-propionic acid;4,5-Dihydro-4-oxo-5-imidazolepropanoate	Heterocyclic compounds	Heterocyclic compounds	179.049	156.054	[M+Na]+	C6H8N2O3	B	307110	286920	326340	332350	273150	327470	284380	368860	350770	410360	461280	640210	190920	245710	309340	249460	248850	242440	815260	549760	935580	736520	279180	228760	757600	665930	608750	754160	732690	957030	426160	414850	465700	508490	418230	462760	410440	475500	548080	564150	575820
MWC10001192	4-Propylphenol	Heterocyclic compounds	Heterocyclic compounds	119.085	136.089	[M+H-H2O]+	C9H12O	B	4156400	6766100	4550200	5373600	6110900	4518300	1610600	1974900	1766900	1643800	2128300	2185500	4614900	3236500	2915000	5784200	3875400	3606100	5269800	6371100	6624200	9025700	5798000	3989000	6109100	6352200	9320700	7230100	7835400	6276500	4228800	3926300	4190600	3207000	3964700	6050700	7790900	6065700	5146800	4807600	7701700
MWC10137871	5,10-Methylenetetrahydrofolate;(6R)-5,10-Methylenetetrahydrofolate;5,10-Methylene-THF	Heterocyclic compounds	Pteridines and derivatives	492.144	457.171	[M+Cl]-	C20H23N7O6	A	9	9	9	9	9	9	9	9	9	9	9	9	9	9	9	9	9	9	31026	97057	25032	31554	23942	9	9	9	9	9	9	9	9	9	9	9	9	9	9	9	9	9	9
MWC10009255	6,7-Dimethyl-8-(D-ribityl)lumazine	Heterocyclic compounds	Pteridines and derivatives	347.098	326.123	[M-2H+Na]-	C13H18N4O6	A	57651	74762	64315	81230	70653	84224	29905	19967	36685	21210	25404	34792	44080	42134	48670	42633	36972	47630	65513	81176	52847	54180	56956	51885	459280	379050	395720	408700	410130	407190	472970	532710	568400	497320	608240	590070	199040	250280	243520	241590	210240
MWC10139196	6-Lactoyl-5,6,7,8-tetrahydropterin	Heterocyclic compounds	Pteridines and derivatives	222.113	239.102	[M+H-H2O]+	C9H13N5O3	A	9	9	9	9	9	9	261490	68089	156200	172010	134390	172400	101750	200780	152870	192610	231780	254730	9	9	9	9	9	248620	432760	300380	170210	101340	134710	276580	9	9	9	9	9	9	5943	12454	11492	10787	9
MWC10139306	7,8-Dihydroneopterin 3'-triphosphate;2-Amino-4-hydroxy-6-(erythro-1,2,3-trihydroxypropyl)dihydropteridine triphosphate;6-(L-erythro-1,2-Dihydroxypropyl 3-triphosphate)-7,8-dihydropterin;6-[(1S,2R)-1,2-Dihydroxy-3-triphosphooxypropyl]-7,8-dihydropterin	Heterocyclic compounds	Pteridines and derivatives	459.982	494.996	[M+H-2H2O]+	C9H16N5O13P3	B	448270	316040	316200	150940	318390	343220	209290	572520	80527	264950	266340	489930	869660	2021900	1369400	2042100	1076000	874730	310410	530600	345930	337160	485600	1534600	371960	300940	364200	365940	576050	551730	4576800	3349700	3054200	3838600	2182000	1774200	339340	532020	564010	415950	250490
MWC10009333	7-Hydroxy-6-methyl-8-ribityl lumazine	Heterocyclic compounds	Pteridines and derivatives	349.076	328.102	[M-2H+Na]-	C12H16N4O7	A	355040	262730	191740	157630	269240	157770	193850	194760	166150	219870	199000	188340	37000	86769	61372	101520	74580	72433	118340	136380	116070	143920	151660	95846	41563	29556	56679	29972	47237	35364	65291	67806	78049	85761	82259	82126	43286	68651	75962	54944	75030
MWC10004756	alpha-[3-[(Hydroxymethyl)nitrosoamino]propyl]-3-pyridinemethanol	Heterocyclic compounds	Pyridine and pyridine derivatives	246.093	225.111	[M-2H+Na]-	C10H15N3O3	B	47986	44497	41478	44662	56317	52387	47997	53733	63240	65095	55024	52942	75191	77967	80801	58628	77941	48607	22120	23481	37866	28570	48203	40063	40603	36930	52102	53992	42669	40056	81507	72933	86190	85308	117330	85412	67887	77411	80345	80659	70551
MWC10146360	Docosatrienoic acid	Heterocyclic compounds	Heterocyclic compounds	352.321	334.287	[M+NH4]+	C22H38O2	A	20819	36028	21938	28716	71616	34827	4314700	2217000	3986200	3508300	2956600	2761200	8696.3	10662	13141	8178.3	26098	13990	20358	12164	10336	14313	12520	17808	67266	74940	54543	59930	40319	45607	7504.7	30015	16333	5534.8	8485.2	7197.8	158660	97873	165000	66335	84440
MWC10141029	Ecgonine methyl ester;Methyl ecgonine	Heterocyclic compounds	Heterocyclic compounds	263.138	199.121	[M+CH3CN+Na]+	C10H17NO3	A	896560	2414200	1392800	2710500	16522000	2255700	27551000	28352000	25936000	13169000	23144000	24447000	3169400	21331000	48341000	24537000	16080000	71014000	922110	1143100	1001200	926280	894850	22106000	1463300	1046700	1870300	2599700	1141000	6990700	4226800	3914800	4083100	3464700	4213900	3611000	3865500	5433500	6067100	4090100	1817700
MWC10001313	Imidazolepropionic acid	Heterocyclic compounds	Heterocyclic compounds	158.092	140.059	[M+NH4]+	C6H8N2O2	A	3529700	3751300	5685700	3877700	3876500	4966500	15632000	13845000	16927000	15841000	15715000	14982000	3037700	2032400	914070	1983000	2286900	2097400	7232400	6705200	7266300	5840600	7161700	2272100	6170300	9028100	7838800	6322200	7326800	8212100	2212700	2608000	2069500	2298800	2152600	2157800	2841200	2092400	1809700	1817000	1729900
MWC10147844	N6-(DELTA2-ISOPENTENYL)-ADENINE	Heterocyclic compounds	Heterocyclic compounds	445.205	203.117	[2M+K]+	C10H13N5	B	66196	35019	15655	20123	32288	47893	59595	36939	96198	56077	51411	54765	239130	173880	149360	129710	116000	134860	234610	301930	270090	235620	273620	206050	190430	206080	201200	186540	208530	168950	59641	48082	64791	55430	66222	72983	325450	224480	235050	264740	288870
MWC10142685	N-Methylserotonin	Heterocyclic compounds	Indole and Its derivatives	242.108	190.111	[M+Cl+NH3]-	C11H14N2O	B	18045	14262	15713	24165	23297	23916	3420.5	1550	6853.7	19983	11432	5477.7	21206	19940	10631	6453.5	9008.2	12615	6847	8375.8	11734	10543	9995.9	7369.9	5632.5	6838.5	6490.4	9173.4	6819.8	11727	17311	10747	16180	19492	24418	6477	23434	20107	13321	22921	18312
MWC10001586	Nornicotine	Heterocyclic compounds	Pyridine and pyridine derivatives	183.064	148.1	[M+Cl]-	C9H12N2	B	9837900	10105000	9099300	9729800	9299000	10086000	8768700	9368400	9336700	9301900	9574500	8794700	8942800	9249400	9245300	9245900	8838300	8872400	9280300	9179200	9709800	9265400	9505200	9563500	10164000	9675900	9979900	9807100	9914900	9683800	9908000	10383000	9891500	10087000	9920700	10144000	9871500	9732700	9649400	9951800	10226000
MWC10002849	Pseudooxynicotine	Heterocyclic compounds	Heterocyclic compounds	255.032	178.111	[M-H+2K]+	C10H14N2O	B	9	9	9	9	9	9	9	9	9	9	9	9	9	9	9	9	9	9	9	9	9	9	9	9	9	9	9	9	9	9	65725	114270	79329	74659	106410	84441	9	9	9	9	9
MWC10143304	Psilocin	Heterocyclic compounds	Indole and Its derivatives	239.095	204.126	[M+Cl]-	C12H16N2O	B	381100	436760	508400	359310	332640	344100	342530	525690	339650	305900	343030	347160	356360	401670	359250	333350	340740	326140	363330	450950	386930	461410	375870	428560	432280	461690	398830	424810	509270	389670	377290	393080	369960	388700	439550	367370	399810	349800	413160	371210	347560
MWC10149407	Quinolin-2-ol	Heterocyclic compounds	Heterocyclic compounds	146.059	145.053	[M+H]+	C9H7NO	B	186920	223570	208640	535880	871050	496690	9	9	9	9	9	9	9	9	9	9	9	9	542930	614400	452950	393080	1007800	9	4672500	2251500	4644500	3069300	7828900	4181400	9	9	9	9	9	9	9	9	9	9	9
MWC10013011	Riboflavin cyclic-4',5'-phosphate	Heterocyclic compounds	Pteridines and derivatives	439.102	438.094	[M+H]+	C17H19N4O8P	A	1269100	972400	922180	921120	960140	1431800	4219400	2499600	3877800	3672300	2739900	2040500	836130	742480	836200	750780	886340	969980	1271100	1627500	1145900	1684200	1530500	1266500	1209900	1592700	1616100	1242600	1310800	821170	2610700	2810500	2466100	2159000	2862200	2749900	926280	980590	1083700	1291700	842780
MWC10004136	Sedoheptulose;D-altro-Heptulose;D-Sedoheptulose;Volemulose	Heterocyclic compounds	Heterocyclic compounds	231.052	210.074	[M-2H+Na]-	C7H14O7	B	9	9	9	9	9	9	80061	57198	13518	13835	60040	26642	5328.1	8378.7	3368.8	9	9	4779.7	9	9	9	9	9	9	9	9	9	9	9	9	9	9	9	9	9	9	9	9	9	9	9
MWC10153390	Thiamine pyrophosphate	Heterocyclic compounds	Heterocyclic compounds	425.044	424.037	[M+H]+	C12H18N4O7P2S	B	70972	32740	51453	60650	24793	52614	157080	274700	297840	483670	160930	328830	183510	289990	260140	299210	282560	190950	30049	55120	104000	15749	120880	165330	282950	309190	440880	450450	292920	326500	1302500	868400	879490	1203200	1158900	1146700	73335	68172	138250	104120	84292
MEDN0180	Norepinephrine	Hormones and hormone related compunds	Hormones and hormone related compunds	168.066	169.074	[M-H]-	C8H11NO3	A	12994	24993	17152	16476	24089	17841	9	17160	14735	9426.8	9	7110.5	29484	15421	23655	26913	19564	19159	7305.4	15228	6856	8938	7580	25375	9	9	9	9	9	9	35726	44032	31453	49817	69253	50776	29094	26822	20321	12562	25786
MEDN0536	estrone 3-sulfate	Hormones and hormone related compunds	Hormones and hormone related compunds	349.111	350.119	[M-H]-	C18H22O5S	B	9	9	9	9	9	9	9	9	9	9	9	9	9	9	9	9	9	9	1973000	1150600	1766500	2094100	1515500	9	9	9	9	9	9	9	9	9	9	9	9	9	9	9	9	9	9
MEDN0824	7-ketodeoxycholic acid	Hormones and hormone related compunds	Hormones and hormone related compunds	405.264	406.272	[M-H]-	C24H38O5	A	9	9	9	9	9	9	9	9	9	9	9	9	9	9	9	9	9	9	18369	13088	11669	19008	19149	9	9	9	9	9	9	9	9	9	9	9	9	9	9	9	9	9	9
MEDP0185	Epinephrine	Hormones and hormone related compunds	Hormones and hormone related compunds	184	183.09	[M+H]+	C9H13NO3	B	1072000	1446100	1509800	1241800	1261300	1781600	3968100	3355300	4129400	3421700	3331900	3835700	1003800	1856300	1391600	1465700	2459500	1432900	6796400	4396200	6577700	4573400	5045300	1655300	56904000	48886000	58782000	59649000	53318000	66194000	67332000	66336000	63267000	66484000	62741000	60643000	9345600	9298600	8080800	5160600	7698800
MEDP0187	Metanephrine	Hormones and hormone related compunds	Hormones and hormone related compunds	198.1	197.105	[M+H]+	C10H15NO3	B	9	9	9	9	9	9	108790	103400	53861	44139	40143	91209	353280	179770	188700	138240	271000	358620	26136	43083	44961	49482	31375	153800	9	9	9	9	9	9	193470	183520	128980	160130	167170	153170	98788	71980	59030	76052	77988
MEDP0210	6-Hydroxymelatonin	Hormones and hormone related compunds	Hormones and hormone related compunds	249	248.116	[M+H]+	C13H16N2O3	B	9	9	9	9	9	9	67923	112350	192310	63208	88480	100440	344460	412160	246440	286770	245550	390380	9	9	9	9	9	315700	9	9	9	9	9	9	9	9	9	9	9	9	9	9	9	9	9
MEDP0428	Cholesterol	Hormones and hormone related compunds	Hormones and hormone related compunds	387.1	386.355	[M+H]+	C27H46O	B	561050	573680	726320	475520	615310	482320	465600	480540	461750	448550	525270	406150	552820	561370	496550	482070	558540	818570	487360	510230	528610	540030	498190	607170	793120	720600	699100	860960	697010	939660	838200	540420	579550	766640	487630	657270	568080	585120	519940	520850	608790
MEDP1272	20,26-dihydroxyecdysone	Hormones and hormone related compunds	Hormones and hormone related compunds	497.3	496.304	[M+H]+	C27H44O8	A	218590000	167370000	188630000	171360000	205300000	231770000	275420000	267810000	268450000	255410000	211230000	251830000	36414000	78160000	93656000	95755000	88767000	84834000	239870000	239730000	269600000	230170000	272300000	80977000	129320000	164620000	156640000	146620000	132430000	121000000	305280000	304540000	312610000	298840000	298830000	292310000	55489000	52530000	54701000	50608000	58288000
MEDP1500	16-Dehydroprogesterone	Hormones and hormone related compunds	Hormones and hormone related compunds	313	312.209	[M+H]+	C21H28O2	B	97074	92899	120500	105480	112740	157780	708440	662870	571060	539880	347930	639780	43538	50622	51062	62008	61195	59978	325170	293440	351050	238480	450170	58878	450680	1300300	807540	497190	488450	563870	2211400	2693300	2405700	2900600	1985900	1669000	90614	113440	74401	117700	112070
MWC10006576	(10S)-Juvenile hormone III acid diol	Hormones and hormone related compunds	Hormones and hormone related compunds	269.176	270.183	[M-H]-	C15H26O4	A	203830	166030	210770	127540	280790	239170	24663	17810	35268	19286	15835	19087	9	9	9	9	9	9	9	9	9	9	9	9	9	9	9	9	9	9	29150	43201	57351	50311	28517	67776	9	9	9	9	9
MWC10010910	(10S)-Juvenile hormone III diol phosphate	Hormones and hormone related compunds	Hormones and hormone related compunds	345.148	364.165	[M-H-H2O]-	C16H29O7P	B	6976.6	7189.5	8348	6598.8	7665.7	5620.3	9	9	9	9	9	9	9	9	9	9	9	9	9	9	9	9	9	9	9	9	9	9	9	9	7364.4	6212.4	7089.5	4953.5	5241.2	4609.3	9	9	9	9	9
MWC10010108	11-Dehydrocorticosterone	Hormones and hormone related compunds	Hormones and hormone related compunds	362.233	344.199	[M+NH4]+	C21H28O4	A	9	9	9	9	9	9	241500	306570	146920	251880	446170	412030	9	9	9	9	9	9	9	9	9	9	9	9	9	9	9	9	9	9	9	9	9	9	9	9	9	9	9	9	9
MWC10007071	12-trans-Hydroxy juvenile hormone III	Hormones and hormone related compunds	Hormones and hormone related compunds	322.201	282.183	[M-H+CH3CN]-	C16H26O4	A	13891	19554	94928	123060	53398	71378	9	9	9	9	9	9	9	9	9	9	9	9	9	9	9	9	9	9	9	9	9	9	9	9	9	9	9	9	9	9	9	9	9	9	9
MWC10151974	17 -Estradiol 3- -D-glucuronide	Hormones and hormone related compunds	Hormones and hormone related compunds	223.095	448.21	[M-2H]-	C24H32O8	B	9	10829	14878	8664	14002	8745.1	461190	289440	252160	223150	334470	175470	16792	7696.4	9	9	12939	9105.4	9	5624.2	11156	9	7729.2	11654	25061	28695	19629	19050	13637	14260	5960.3	4747.4	11285	14335	13414	9675.1	10820	7046.1	9718.8	11429	6881.8
MWC10012546	17alpha,20alpha-Dihydroxycholesterol	Hormones and hormone related compunds	Hormones and hormone related compunds	455.296	418.345	[M-2H+K]-	C27H46O3	B	6550.1	9884.5	7707.4	8329.9	18103	45992	253160	275050	210450	230720	200630	159150	1180.5	1062.7	1464.2	951.97	1048.1	1856.9	339.66	518.93	282.27	424.26	416.76	1372.9	54445	220500	149940	94992	81777	44346	4008.9	5582.3	2506	1742.7	3326.9	2972.7	7884.2	3718.7	4969.8	5404.7	9039.8
MWC10151981	17beta estradiol	Hormones and hormone related compunds	Hormones and hormone related compunds	309.134	272.178	[M-2H+K]-	C18H24O2	B	9	9	9	9	9	9	131680	101670	123090	63458	125820	138260	12246	9	6118.3	9	6103.5	9	9	9	9	9	9	9	9	9	9	9	9	9	7024.3	32047	9790.5	2164.3	18775	19126	9	9	9	9	9
MWC10152026	19-Noretiocholanolone	Hormones and hormone related compunds	Hormones and hormone related compunds	259.205	276.209	[M+H-H2O]+	C18H28O2	B	9	9	9	9	9	9	9	9	9	9	9	9	9	9	9	9	9	9	9	9	9	9	9	9	9	9	9	9	9	9	9	9	9	9	9	9	9	9	9	9	9
MWC10012846	2,22-Dideoxy-3-dehydroecdysone	Hormones and hormone related compunds	Hormones and hormone related compunds	411.278	430.308	[M-H-H2O]-	C27H42O4	B	9	9	9	9	9	9	172890	216050	203500	148810	216880	148450	31552	34535	26802	19234	24248	34090	9	9	9	9	9	39873	23638	31197	18561	18735	9	9	28681	31522	23971	25075	27160	30283	9	1886.7	9	9	9
MWC10152014	21-hydroxyallopregnanolone	Hormones and hormone related compunds	Hormones and hormone related compunds	335.257	334.251	[M+H]+	C21H34O3	B	37726	30861	42651	35180	46766	57622	10745000	7466900	5669100	3469900	5154200	5933900	660380	2198400	2935400	2847900	2867900	2863600	27591	27465	44728	33513	39361	2363900	1187000	3794600	2536400	1627300	1344100	1955700	1782400	2212400	1922000	2079200	1656100	1331000	40441	39625	36024	23026	52767
MWC10013157	3-Dehydro-2-deoxyecdysone	Hormones and hormone related compunds	Hormones and hormone related compunds	467.285	446.303	[M-2H+Na]-	C27H42O5	B	9	15666	218760	184100	53461	68486	9	9	9	9	9	9	9	9	9	9	9	9	9	9	9	9	9	9	9	9	9	9	9	9	9	9	9	9	9	9	9	9	9	9	9
MWC10013427	3-Dehydroecdysone	Hormones and hormone related compunds	Hormones and hormone related compunds	517.292	462.298	[M+Cl+NH3]-	C27H42O6	B	9	9	9	9	9	9	9	9	9	9	9	9	829760	830820	804070	694630	580100	972800	9	9	9	9	9	1114500	9	9	9	9	9	9	9	9	9	9	9	9	9	9	9	9	9
MEDN0133	Coenzyme II (β-NADP)	Nucleotide And Its metabolomics	Nucleotide and Its metabolomics	743.075	744.083	[M-H]-	C21H29N7O17P3	A	58081	51185	57353	27229	46038	46213	85325	101500	75886	118080	97136	87629	87433	106860	125480	89679	96949	117490	87289	64352	57470	66654	75037	110740	119390	181120	150150	147880	178450	154650	133050	92855	111050	124850	114010	102860	73034	96336	71264	71814	48282
MEDN0140	Xanthine	Nucleotide And Its metabolomics	Nucleotide and Its metabolomics	151.026	152.033	[M-H]-	C5H4N4O2	A	9	9	9	9	9	9	4768900	4475000	5777400	6962600	2478200	5821900	168620	255440	195540	161830	130760	222830	9	9	9	9	9	9	111480	67879	152950	100950	134460	114130	96051	70011	68741	104200	60771	88683	129560	213530	318170	268040	254030
MEDN0141	2'-Deoxyuridine	Nucleotide And Its metabolomics	Nucleotide and Its metabolomics	227.067	228.075	[M-H]-	C9H12N2O5	A	12704	17473	10188	15352	14128	19487	30741	23474	152540	25780	39414	43784	12458	16497	16613	14815	18690	14838	62955	62086	62124	52784	53038	18417	30426	7934.5	39317	7984.3	10052	7639	40670	22328	43370	35575	24500	15481	12984	43079	35462	9	9
MEDN0143	3'-Aenylic Acid	Nucleotide And Its metabolomics	Nucleotide and Its metabolomics	346.055	347.063	[M-H]-	C10H14N5O7P	A	3855800	14058000	18075000	13230000	12073000	8619800	22941000	15936000	22644000	17246000	20666000	15884000	372390	256140	277170	276980	305680	434840	188390	247560	466570	299700	293080	213090	6702300	11924000	10319000	7502700	11670000	9566400	6497500	12302000	13768000	18429000	15222000	11683000	1714800	964440	1275200	1960600	1968400
MEDN0146	5-Hydroxymethyluracil	Nucleotide And Its metabolomics	Nucleotide and Its metabolomics	141.03	142.038	[M-H]-	C5H6N2O3	A	48640	72451	90996	99435	116900	112120	1315400	1162400	1385400	1787800	1475400	1356300	164700	173790	186870	190640	149530	155520	182870	139260	147170	154030	145080	138170	909830	1940800	1107000	1262200	1208600	1077400	364560	409400	378560	268940	538860	485460	321110	273660	135400	348380	285460
MEDN0147	5-Methylcytosine	Nucleotide And Its metabolomics	Nucleotide and Its metabolomics	124.051	125.059	[M-H]-	C5H7N3O	A	1161100	943760	1075000	1059700	990750	1146200	2801300	2628800	2917400	3121300	2383900	2703400	305770	302560	289270	318530	370470	304340	199180	128210	209550	197000	235620	371230	612630	1029700	599900	602330	825000	737710	727080	749700	621990	650020	628570	604220	70415	70739	85273	55628	70445
MEDN0152	Adenosine 5'-Diphosphate	Nucleotide And Its metabolomics	Nucleotide and Its metabolomics	426.022	427.029	[M-H]-	C10H15N5O10P2	A	8183300	6204100	7568500	4909400	6621300	14686000	5228000	1165300	14156000	2302300	2402900	809460	4548400	4901300	6130800	6213800	7556100	6691000	4651900	4626900	7649100	5935100	8109300	7247900	1926900	2058600	1472200	862900	1311200	781760	49212000	57711000	44181000	49620000	55104000	60741000	11348000	6979500	8829000	9462300	6632500
MEDN0153	Adenosine 5'-Monophosphate	Nucleotide And Its metabolomics	Nucleotide and Its metabolomics	346.055	347.063	[M-H]-	C10H14N5O7P	A	7879300	33104000	41695000	28943000	28254000	19488000	57638000	41730000	56007000	44373000	56110000	42049000	578080	454410	466930	501490	544650	657270	527380	781500	1041200	930520	558710	333400	20313000	28573000	33121000	21565000	32509000	27310000	10825000	24280000	23601000	27454000	29342000	22354000	3190700	1834000	2476600	3562300	3841900
MEDN0155	Cytidine	Nucleotide And Its metabolomics	Nucleotide and Its metabolomics	242.078	243.086	[M-H]-	C9H13N3O5	A	16118	18511	22626	19207	15090	23318	9	9	9	9	9	9	68581	188800	104310	156510	175240	118900	125640	23209	121840	205730	205350	145520	9	9	9	9	9	9	7543	8933.4	6839.7	6186	13037	9265.7	7891.7	26411	7208.2	5495.8	6184
MEDN0158	Deoxyguanosine	Nucleotide And Its metabolomics	Nucleotide and Its metabolomics	266.089	267.097	[M-H]-	C10H13N5O4	A	460120	394720	337890	249010	513720	443170	608240	284640	981830	290460	480470	441720	116130	216900	286590	251170	251530	261060	623880	681820	620560	671020	589870	298880	308780	256140	306150	241080	129860	176130	2929700	3182700	3952800	2998400	4158200	3242700	1114400	3004700	2082200	754120	656770
MEDN0159	Flavin Adenine Dinucleotide	Nucleotide And Its metabolomics	Nucleotide and Its metabolomics	784.149	785.157	[M-H]-	C27H33N9O15P2	A	2926100	2422000	2164800	2176000	2434700	2970400	14469000	8006900	12599000	11775000	9299300	5647800	4235700	3630000	3660800	3677600	4144000	3552400	3673000	3785300	3854900	3983900	3824400	4841000	4439000	6882400	6037400	5264800	4968900	3520800	6184100	7339700	6826800	5533200	6367300	6645000	3499900	4127600	3515400	4431300	3523500
MEDN0161	Guanosine 3',5'-Cyclic Monophosphate	Nucleotide And Its metabolomics	Nucleotide and Its metabolomics	344.04	345.047	[M-H]-	C10H12N5O7P	A	230510	52959	87295	90093	77326	95650	248840	239900	238600	155210	205060	128000	167170	90994	72164	121500	251610	222620	45204	60505	47144	87520	58259	134530	101720	164570	224180	130470	294330	157880	88635	73105	111250	85177	87179	72537	222750	141560	126390	214890	178310
MEDN0162	Guanosine Monophosphate	Nucleotide And Its metabolomics	Nucleotide and Its metabolomics	362.05	363.058	[M-H]-	C10H14N5O8P	A	292970	1377100	1608400	973270	880900	543930	2335500	1768800	3778100	2456000	1817700	2876700	94524	109110	55240	64380	82618	137910	137010	126780	145930	164200	113310	82220	2311200	2259400	2276900	2353000	2222000	1998600	565850	788250	761870	695130	824120	670980	258110	208020	239520	257130	259820
MEDN0163	Hypoxanthine	Nucleotide And Its metabolomics	Nucleotide and Its metabolomics	135.031	136.039	[M-H]-	C5H4N4O	A	46053	83128	49676	23261	76580	23205	2217300	2735700	2592700	3143300	1553400	2962500	71201	74449	92762	33137	33642	109890	9	9	9	9	9	9	112750	177320	146280	145450	170150	115780	54988	91915	45757	62237	89933	70738	29677	36078	51386	46902	35695
MEDN0165	Inosine 5'-Monophosphate	Nucleotide And Its metabolomics	Nucleotide and Its metabolomics	347.039	348.047	[M-H]-	C10H13N4O8P	A	1544300	2427600	3734700	2256400	2781900	2133600	16102000	12628000	9621800	9368200	11239000	14615000	106990	104540	89481	83646	151560	152890	242870	295800	221620	380930	294250	52634	1790700	2495700	2735100	1825400	3234600	2154900	1518700	2550800	2790800	3231900	3215900	2538400	651640	428510	790720	1041800	854390
MEDN0166	Nicotinic Acid Adenine Dinucleotide	Nucleotide And Its metabolomics	Nucleotide and Its metabolomics	662.101	663.109	[M-H]-	C21H27N7O14P2	A	659370	380230	478450	325730	450110	508050	1104800	814150	1056800	1310800	1028500	1005800	1438100	1042200	1213700	1341300	1747200	1171400	839960	913180	621180	536820	524630	720690	1140000	1389300	1149000	1345600	1538400	1362600	1937200	1338900	1045200	1328800	1305300	1081300	727230	1104300	970810	910740	1012100
MEDN0170	Uridine 5’-Diphosphate	Nucleotide And Its metabolomics	Nucleotide and Its metabolomics	403	404.002	[M-H]-	C9H14N2O12P2	B	28463	10719	9	9	12743	18415	9	9	9	9	9	9	16603	16187	12736	21100	23790	26804	9	9	9	9	9	9	9	9	9	9	9	9	9	9	9	9	9	9	12851	11449	4272.9	9043.3	11396
MEDN0171	Uridine	Nucleotide And Its metabolomics	Nucleotide and Its metabolomics	243.062	244.07	[M-H]-	C9H12N2O6	A	5772700	12493000	11791000	10673000	8536200	6174200	2896300	2747600	3204200	1993600	2631200	3169400	1550600	1593000	866630	1434100	1240700	1344300	1327600	1590800	1293000	2083000	2543400	1414000	10155000	8071400	8051600	9203200	8470100	7500300	1237900	1141400	1190300	1511100	1644900	1030200	857320	1188800	1892200	985580	919130
MEDN0173	Uridine 5'-Diphospho-N-Acetylgalactosamine	Nucleotide And Its metabolomics	Nucleotide and Its metabolomics	606.074	607.1	[M-H]-	C17H27N3O17P2	B	16239000	21137000	21546000	17699000	20638000	22085000	6486600	7554700	5091100	5418000	6338100	8747600	26912000	23394000	28680000	25399000	33803000	30013000	28480000	29255000	33059000	27885000	32098000	26390000	42841000	27678000	27572000	34102000	35817000	34144000	23962000	22642000	23018000	16913000	24843000	23564000	18673000	20954000	17648000	18780000	17639000
MEDN0306	Creatine phosphate	Nucleotide And Its metabolomics	Nucleotide and Its metabolomics	210.1	255	[M-Na2+H]-	C4H8N3Na2O5P	B	15018	20003	9567.7	20010	16016	19675	75688	31161	116930	48583	72007	51597	9	9	9	9	9	9	24114	90803	39863	31156	32496	9373.7	133990	136560	138970	103220	50426	51259	40535	59666	57613	29817	51917	70057	9	9	9	9	9
MEDN0419	Uridine 5-Monophosphate	Nucleotide And Its metabolomics	Nucleotide and Its metabolomics	323.028	324.036	[M-H]-	C9H13N2O9P	A	571890	184880	228420	581050	737700	1248300	5383700	3436500	9054300	3651200	3570100	6104700	521070	596640	447650	391490	594210	790080	358630	616870	400900	495530	484090	551140	4403100	4451000	3504500	3688600	3781500	4569400	3859000	7175700	4899500	5138100	6742000	6379100	1884300	1781800	1391600	1151600	1077400
MEDN0421	Cyclic Amp	Nucleotide And Its metabolomics	Nucleotide and Its metabolomics	328.045	329.053	[M-H]-	C10H12N5O6P	A	2185500	1991300	1643400	1820800	1985000	2375900	2084600	2168600	2070100	2012200	2328100	1874300	1858400	1797600	1771800	2010800	2140600	1703900	2360700	2478600	3186400	2453300	2874700	2065400	3405500	4026700	3900200	3520400	4121500	2936400	2490100	2419800	2652400	2085500	2590400	2675700	1885400	1646500	1583200	1488600	1538300
MEDN0428	N6-Succinyl Adenosine	Nucleotide And Its metabolomics	Nucleotide and Its metabolomics	382.1	383.108	[M-H]-	C14H17N5O8	A	102690	109320	60787	65832	138690	96820	11297000	6424300	4458600	5812900	3488200	4332800	92040	106270	83457	79565	169810	100410	209590	228240	193900	208980	201650	168750	2125500	1028800	2016900	2636500	1046600	1642700	1622100	2065700	1871900	1414900	1525800	1301100	213130	120940	200220	127730	164090
MEDN0431	2-(Dimethylamino)Guanosine	Nucleotide And Its metabolomics	Nucleotide and Its metabolomics	310.115	311.123	[M-H]-	C12H17N5O5	A	15070	29105	13875	15968	20216	11156	91131	62101	162590	88147	75270	81848	9708	13949	9352.5	8416.2	15411	14329	34601	34494	33989	40062	33119	29081	21408	7360.2	10673	6466.2	5034.6	8441.3	2985800	2865500	4119700	3240900	3721200	2818800	90533	142210	96194	58480	45471
MEDN0433	8-Hydroxy-2-Deoxyguanosine	Nucleotide And Its metabolomics	Nucleotide and Its metabolomics	282.084	283.092	[M-H]-	C10H13N5O5	A	9	9	9	9	9	9	9	9	9	9	9	9	21397	17047	14976	21860	22336	13417	9	9	9	9	9	9	329750	307410	289050	308280	255690	218680	9	9	9	9	9	9	9	9	9	9	9
MEDN0434	Β-Pseudouridine	Nucleotide And Its metabolomics	Nucleotide and Its metabolomics	243.062	244.07	[M-H]-	C9H12N2O6	A	112160	165770	167920	150960	143220	107950	818770	898840	810370	510040	561410	851300	111810	125550	111390	137140	106070	121560	139850	118030	100770	145360	92730	100530	360630	322530	437000	425050	332860	365630	538020	414000	577890	530430	677910	571790	135330	185260	217950	214970	212090
MEDN0452	2'-Deoxycytidine-5'-Monophosphate	Nucleotide And Its metabolomics	Nucleotide and Its metabolomics	306.049	307.057	[M-H]-	C9H14N3O7P	A	908640	753030	778980	801210	556700	647250	18540	32075	56358	49778	44843	33705	33619	47351	45797	75823	27670	32071	1071000	927840	1328300	1220300	1046400	24732	641100	56885	366520	459060	164220	320290	71049	72721	125710	148900	81691	37283	697620	606510	806900	819280	751020
MEDN0533	Xanthosine	Nucleotide And Its metabolomics	Nucleotide and Its metabolomics	283.068	284.076	[M-H]-	C10H12N4O6	A	1147000	1193600	1050200	907090	1267600	1347300	4499700	15139000	13275000	12955000	6029600	10102000	1927000	3475800	2400900	2560600	3833700	2489700	977410	995420	1094400	1064200	877850	4432200	1632600	1817000	2018900	1843600	2130000	1482200	11144000	13934000	15590000	13210000	15854000	12488000	972920	1213000	1186900	776230	564990
MEDN0534	Deoxyguanosine diphosphate(dGDP)	Nucleotide And Its metabolomics	Nucleotide and Its metabolomics	426.022	427.029	[M-H]-	C10H15N5O10P2	A	8183300	6204100	7568500	4909400	6621300	14686000	5228000	1165300	14156000	2302300	2402900	809460	4548400	4901300	6130800	6213800	7556100	6691000	4651900	4626900	7649100	5935100	8109300	7247900	1926900	2058600	1472200	862900	1311200	781760	49212000	57711000	44181000	49620000	55104000	60741000	11348000	6979500	8829000	9462300	6632500
MEDN0537	ADP-ribose	Nucleotide And Its metabolomics	Nucleotide and Its metabolomics	558.064	559.072	[M-H]-	C15H23N5O14P2	B	1299100	892730	703150	1019500	839020	1043900	2618500	2762900	1974100	2366500	3801300	2229600	2302000	1479700	1462500	1842100	1713100	1840100	1472700	2378800	1842800	1677000	1598900	2544700	3695300	2606300	3822300	3912700	3970700	3490900	2106800	1904700	1773200	1605000	1493000	2094700	3523900	3795200	4585100	2573900	1852800
MEDN0538	UDP-glucose	Nucleotide And Its metabolomics	Nucleotide and Its metabolomics	565.047	566.055	[M-H]-	C15H24N2O17P2	A	37722000	42199000	46574000	38728000	40720000	55062000	13743000	10565000	11567000	16970000	11248000	17453000	46290000	40927000	49442000	46035000	44039000	47238000	61011000	65141000	64818000	64162000	60041000	57291000	85699000	74547000	86197000	80896000	114150000	95012000	53553000	53956000	58251000	55549000	42170000	54335000	73240000	72142000	53426000	64189000	60211000
MEDN0568	2-Methylguanosine	Nucleotide And Its metabolomics	Nucleotide and Its metabolomics	296.1	297.107	[M-H]-	C11H15N5O5	A	47974	59258	58170	29513	54223	29994	251420	163820	339870	194540	200560	270050	277300	344930	266310	448360	301190	293590	260160	192310	218810	267610	195120	376570	480900	591090	454230	466510	489060	517780	3741400	3873000	4939000	4691700	5437800	3822300	166470	209720	110810	123190	106220
MEDN0573	GDP-L-fucose	Nucleotide And Its metabolomics	Nucleotide and Its metabolomics	588.074	589.082	[M-H]-	C16H25N5O15P2	A	180930	176660	152360	110890	110530	141710	173690	167990	125820	188420	219540	272330	185780	221140	155700	209440	215950	279920	103810	202080	158620	123940	130770	302870	388760	229370	332010	351310	238930	281720	310520	388180	272210	408670	383000	464680	185730	165490	194370	162210	91772
MEDN0602	deoxyguanosine 5'-monophosphate(dGMP)	Nucleotide And Its metabolomics	Nucleotide and Its metabolomics	346.055	347.063	[M-H]-	C10H14N5O7P	A	7879300	33104000	41695000	28943000	28254000	19488000	57638000	41730000	56007000	44373000	56110000	42049000	578080	454410	466930	501490	544650	657270	527380	781500	1041200	930520	558710	333400	20313000	28573000	33121000	21565000	32509000	27310000	10825000	24280000	23601000	27454000	29342000	22354000	3190700	1834000	2476600	3562300	3841900
MEDN0624	5'-Adenylyl sulfate(APS)	Nucleotide And Its metabolomics	Nucleotide and Its metabolomics	426.012	427.02	[M-H]-	C10H14N5O10PS	A	10071000	12062000	8983600	5866800	9063400	17201000	9465500	2515100	27142000	5155100	5974200	2365700	7578000	6664200	8422800	6188100	10438000	10942000	6717900	11526000	11582000	12237000	11351000	11194000	3175100	3695700	2447100	1652500	2418200	1297800	90866000	109610000	75480000	85024000	96551000	116410000	18266000	12382000	12504000	11701000	11141000
MEDN1012	7-Methylguanine	Nucleotide And Its metabolomics	Nucleotide and Its metabolomics	164.057	165.065	[M-H]-	C6H7N5O	A	9	9	9	9	9	9	27675	15304	29042	15652	14903	24505	11978	8339.3	6280.4	8077.8	14613	13044	7845.5	9135.3	26257	6572.8	25758	4193.5	283480	297290	282110	309740	266840	261900	145650	125430	204850	160150	154880	125380	405220	395320	316700	258850	250960
MEDN1045	2-Amino-4,6-pteridinediol	Nucleotide And Its metabolomics	Nucleotide and Its metabolomics	178.038	179.044	[M-H]-	C6H5N5O2	A	14231	26735	20680	11795	13998	15435	224850	167820	301680	290750	243280	351830	1596500	1891200	1446000	1492800	1667200	1433900	396640	323430	317510	290170	260560	1463600	2932000	3995500	4258300	3138000	3385900	3694400	250000	246890	331610	200410	321010	385450	100940	115110	129830	92736	94566
MEDN1117	Uridine diphosphate-N-acetylglucosamine	Nucleotide And Its metabolomics	Nucleotide and Its metabolomics	606.074	607.082	[M-H]-	C17H27N3O17P2	A	16239000	21137000	21546000	17699000	20638000	22085000	6486600	7554700	5091100	5418000	6338100	8747600	26912000	23394000	28680000	25399000	33803000	30013000	28480000	29255000	33059000	27885000	32098000	26390000	42841000	27678000	27572000	34102000	35817000	34144000	23962000	22642000	23018000	16913000	24843000	23564000	18673000	20954000	17648000	18780000	17639000
MEDN1137	Flavin Single Nucleotide(FMN)	Nucleotide And Its metabolomics	Nucleotide and Its metabolomics	455.096	456.105	[M-H]-	C17H21N4O9P	A	396440	324010	253340	269340	302930	422270	1642100	1334500	1427100	1578100	1407700	1504200	483000	457080	399410	512670	541370	434140	458990	549140	514750	563890	565690	528570	434950	640000	533060	430600	448520	325520	1732600	1906500	1756700	1520300	1752800	1600600	760070	835970	770780	909950	789640
MEDN1236	Cyclic ADP ribose	Nucleotide And Its metabolomics	Nucleotide and Its metabolomics	540.1	541.061	[M-H]-	C15H21N5O13P2	A	2791400	2413300	2209000	2260200	2526300	3093500	6192700	5550600	6119500	6609300	6213200	5495300	6923500	4680800	5499900	5950900	5335500	5798000	3778500	3841400	4214300	4339600	3499800	5999300	5757100	7598800	6484600	5853400	7945500	7286100	7759300	7817900	8592900	6818600	7573600	8187100	5280700	6007000	5897000	5194500	5524400
MEDN1332	Adenosine-5'-Diphosphoglucose	Nucleotide And Its metabolomics	Nucleotide and Its metabolomics	588	589.082	[M-H]-	C16H25N5O15P2	A	6696.6	17558	21483	20348	19740	28052	58435	32129	48725	48168	56030	26999	14700	5174	14361	11493	5329.2	12198	175640	221760	169440	225030	159020	19098	62470	50401	43348	80456	81067	66679	155370	188430	148460	160260	195610	192710	17056	14719	15386	12286	14601
MEDP0145	1,7-Dimethylxanthine	Nucleotide And Its metabolomics	Nucleotide and Its metabolomics	181.1	180.065	[M+H]+	C7H8N4O2	B	64395	82102	57976	63246	75103	76121	23902	12007	26578	4186.9	20228	12959	17038	25553	22761	21201	18744	29687	60324	66785	67924	61423	65362	38897	11337	43360	15480	11305	29854	7800.2	52782	50339	60303	44862	52268	46497	99500	94464	86592	92218	96154
MEDP0148	1-Methylxanthine	Nucleotide And Its metabolomics	Nucleotide and Its metabolomics	167.1	166.049	[M+H]+	C6H6N4O2	B	9	9	9	9	9	9	9	9	9	9	9	9	9	9	9	9	9	9	9	9	9	9	9	9	9	9	9	9	9	9	102550	115200	142760	117150	107670	98315	9	9	9	9	9
MEDP0149	2'-Deoxyadenosine-5'-Monophosphate	Nucleotide And Its metabolomics	Nucleotide and Its metabolomics	332	331.068	[M+H]+	C10H14N5O6P	A	586440	1930200	1312700	1261200	1194500	591240	1089200	1310200	1008800	2396800	1280200	2330800	630000	274390	571160	481110	553610	872130	157780	145030	163040	180560	151920	468690	5758800	5278800	4870700	5467400	3005600	3906500	1383200	2173800	1622000	1446700	2077700	1360000	402090	385310	389220	308320	318680
MEDP0150	2'-Deoxyinosine	Nucleotide And Its metabolomics	Nucleotide and Its metabolomics	253.1	252.086	[M+H]+	C10H12N4O4	B	9	9	9	9	9	9	9	110750	9	258840	77401	280740	23773	118510	225480	166080	59637	97484	18260	26800	39965	23322	12323	99685	189820	151790	337780	267980	118110	109210	9	9	9	9	9	9	9	9	10707	9	9
MEDP0151	2-Hydroxy-6-Aminopurine	Nucleotide And Its metabolomics	Nucleotide and Its metabolomics	152.1	151.049	[M+H]+	C5H5N5O	A	883170	2134500	1013800	847350	1253200	794680	1632500	1711100	2291700	1669700	1658500	1468600	445520	543170	351010	458330	537120	442030	1540700	1208200	1412600	1488800	1415100	496760	6488200	5213600	4095600	6869700	5471000	4808700	1452900	1493700	1296300	1483700	1810400	1599800	626720	1022300	811770	446050	495090
MEDP0156	5-Methyluridine	Nucleotide And Its metabolomics	Nucleotide and Its metabolomics	259.085	258.085	[M+H]+	C10H14N2O6	A	19602	57960	38267	28756	30589	13610	55977	29105	70260	54004	44211	34174	266170	242230	173280	244540	232800	244190	25087	21354	26010	16370	23333	279310	74988	82646	85840	88865	70765	62820	606480	567720	628380	615780	650310	524570	9	9	9	9	9
MEDP0157	7-Methylxanthine	Nucleotide And Its metabolomics	Nucleotide and Its metabolomics	167	166.049	[M+H]+	C6H6N4O2	B	23701	36805	20582	20358	41707	24121	59876	77684	105720	52512	53234	56658	86678	77464	61936	85338	65719	77674	89481	87249	74315	84586	74759	89108	124470	153120	86625	96501	89769	131160	1407100	1421700	1664300	1322700	1681900	1491800	202540	132530	85581	69374	71768
MEDP0158	8-Hydroxyguanosine	Nucleotide And Its metabolomics	Nucleotide and Its metabolomics	300.1	299.087	[M+H]+	C10H13N5O6	B	9	9	9	9	9	9	9	9	9	9	9	9	38576	13000	22488	37628	35991	22481	28854	11319	18991	23179	11737	33828	49359	54823	31677	65703	39939	27636	244750	251500	306780	271260	330080	270550	20173	24894	7587.3	21396	7127.8
MEDP0159	Adenine	Nucleotide And Its metabolomics	Nucleotide and Its metabolomics	136.1	135.055	[M+H]+	C5H5N5	A	11301000	13455000	10520000	12298000	12373000	13586000	58875000	57403000	53335000	72307000	48970000	42683000	7079900	11202000	6739900	7729900	7039100	8532500	9757000	11054000	10248000	12428000	12737000	9640700	82876000	72553000	72558000	83484000	69431000	71037000	3349300	5218400	6977900	4269500	6321000	3001800	12655000	14758000	11837000	15065000	17414000
MEDP0160	Adenosine	Nucleotide And Its metabolomics	Nucleotide and Its metabolomics	268.097	267.097	[M+H]+	C10H13N5O4	B	133970000	126220000	85337000	97028000	137130000	108780000	292250000	299350000	218960000	286400000	286560000	275720000	5957800	11978000	13796000	13352000	13132000	18710000	208510000	219760000	241070000	226420000	231690000	14031000	61981000	83386000	82753000	76893000	79485000	76093000	51566000	59511000	96550000	91444000	73170000	66084000	52561000	35922000	53287000	66441000	74972000
MEDP0164	Cytidine-5-Monophosphate	Nucleotide And Its metabolomics	Nucleotide and Its metabolomics	324	323.052	[M+H]+	C9H14N3O8P	A	1669400	1223900	1437200	2107200	1776500	3685700	2223000	2025000	4270100	1876100	1777100	2365000	821890	1069100	1044300	1014600	1304700	1002800	1450600	1122900	1548100	1330600	1092100	1015800	29844000	14294000	21323000	19078000	24253000	27388000	3292200	7780500	5458600	6618400	9003600	6916100	1234500	1051800	1173000	1182500	1109900
MEDP0165	Cytosine	Nucleotide And Its metabolomics	Nucleotide and Its metabolomics	112	111.043	[M+H]+	C4H5N3O	A	1063600	3522400	2801300	2351900	2068600	1470400	398580	258030	397550	355510	246670	339810	157440	216780	175300	205820	267220	112130	395360	507510	396980	672260	572130	181780	5508700	5292200	4762900	5394700	5154200	2970700	466960	461720	549110	342530	453620	305220	269680	854680	556070	371730	259470
MEDP0167	Guanosine	Nucleotide And Its metabolomics	Nucleotide and Its metabolomics	284.092	283.092	[M+H]+	C10H13N5O5	A	36202000	147820000	64735000	41152000	72694000	25154000	35903000	34733000	66052000	28257000	31961000	38150000	6718500	6373700	4055000	5539200	7852300	5521100	53028000	47377000	36692000	59649000	41711000	6215900	227080000	191550000	176680000	209510000	185680000	173480000	41654000	42492000	49580000	49773000	58504000	51772000	40477000	52729000	41891000	28039000	25695000
MEDP0171	Inosine	Nucleotide And Its metabolomics	Nucleotide and Its metabolomics	269.1	268.081	[M+H]+	C10H12N4O5	A	66925000	53601000	41885000	27740000	54887000	32648000	315920000	275880000	279900000	274150000	215070000	231570000	15013000	22525000	15370000	22779000	29145000	18315000	70312000	74717000	58970000	87678000	69326000	26067000	31544000	32112000	42163000	30009000	40963000	35540000	52100000	55900000	65025000	63445000	65332000	72937000	19413000	24647000	25442000	22164000	18040000
MEDP0176	Thymidine	Nucleotide And Its metabolomics	Nucleotide and Its metabolomics	243.09	242.09	[M+H]+	C10H14N2O5	B	79598	72700	68580	69714	126470	63024	78458	64787	321530	26425	54062	62000	9	24361	21970	43100	20917	31203	179450	148940	117880	129300	181830	39200	46646	77400	22883	22637	29447	20498	373150	273620	402760	327630	223730	211010	63009	307250	157800	69621	74320
MEDP0177	Thymine	Nucleotide And Its metabolomics	Nucleotide and Its metabolomics	127	126.043	[M+H]+	C5H6N2O2	A	59090	55348	18873	63611	59974	38872	2054000	860240	4233600	737800	1143700	1927800	350090	329810	1200600	158890	285460	426370	79720	29863	81908	71136	70117	212500	482580	302480	366510	364200	477200	288340	921840	437780	798570	553750	667310	577750	258120	3828400	2052700	235430	146470
MEDP0178	Uracil	Nucleotide And Its metabolomics	Nucleotide and Its metabolomics	113.027	112.027	[M+H]+	C4H4N2O2	A	5094600	9002000	9088600	8460000	6378400	4381600	4484000	3913800	3512700	3133800	3248100	3474600	2549900	1386900	1117700	1537900	1642200	1695600	929100	1198700	1055400	2085900	2388400	1205700	16729000	12615000	12608000	12922000	12355000	10790000	2033300	1881500	1910900	2236200	2435800	1743200	958270	1524200	2562100	991430	1099300
MEDP0180	Β-Nicotinamide Mononucleotide	Nucleotide And Its metabolomics	Nucleotide and Its metabolomics	335.1	334.057	[M+H]+	C11H15N2O8P	A	443880	732300	407230	418500	462570	398170	17049000	21378000	19431000	20590000	13080000	18531000	4772200	6225300	5515000	5894600	8145400	5571400	7015100	6304400	5159600	4635700	6720300	6192700	1346100	1589100	1573400	1622600	1331100	1536600	4142700	2626600	3350000	3623700	3107300	3413200	1043100	1065100	1098900	585570	550300
MEDP0375	Deoxyadenosine	Nucleotide And Its metabolomics	Nucleotide and Its metabolomics	252	251.102	[M+H]+	C10H13N5O3	B	35991	25729	22442	34382	87124	32475	52076	704890	115100	2033500	596450	1702200	233360	929190	1630000	1206800	642110	831700	132070	178060	247180	167590	173250	895370	1274000	1101600	2332700	1905700	704810	709970	129520	52070	156780	117590	77020	44035	100090	75025	62484	250300	164320
MEDP0390	Hypoxanthine-9-β-D-Arabinofuranoside	Nucleotide And Its metabolomics	Nucleotide and Its metabolomics	269.1	268.081	[M+H]+	C10H12N4O5	B	66925000	53601000	41885000	27740000	54887000	32648000	315920000	275880000	279900000	274150000	215070000	231570000	15013000	22525000	15370000	22779000	29145000	18315000	70312000	74717000	58970000	87678000	69326000	26067000	31544000	32112000	42163000	30009000	40963000	35540000	52100000	55900000	65025000	63445000	65332000	72937000	19413000	24647000	25442000	22164000	18040000
MEDP0401	5'-Deoxy-5'-(Methylthio) Adenosine	Nucleotide And Its metabolomics	Nucleotide and Its metabolomics	298	297.09	[M+H]+	C11H15N5O3S	A	73783000	65763000	58418000	56654000	62738000	66077000	85279000	85677000	75342000	92889000	79536000	73940000	121720000	103220000	88317000	112990000	109210000	88789000	86049000	95873000	99249000	96845000	89590000	104270000	75540000	70789000	78306000	71117000	87649000	70100000	105650000	93336000	109180000	91191000	97155000	101040000	71090000	75463000	64980000	66538000	57051000
MEDP0403	Deoxycytidine	Nucleotide And Its metabolomics	Nucleotide and Its metabolomics	228	227.091	[M+H]+	C9H13N3O4	A	59423	55083	42040	57156	66416	40861	13639	22765	22652	11145	23040	30088	8389.1	15798	22108	16765	43988	33340	11125	16647	34148	22523	38024	20199	29092	27280	17696	29349	22735	29511	33157	15473	17881	12845	34951	16486	66456	236560	148510	77831	53226
MEDP0435	6-Methyl mercaptopurine	Nucleotide And Its metabolomics	Nucleotide and Its metabolomics	167.1	166.031	[M+H]+	C6H6N4S	A	91301000	110820000	79415000	102590000	110620000	96078000	74077000	65236000	101480000	54775000	67683000	69991000	107040000	133230000	125890000	121950000	117020000	129730000	106440000	112890000	116270000	107480000	100680000	128010000	66302000	63950000	51204000	55012000	58515000	63940000	38709000	36876000	41587000	36839000	46145000	42110000	91642000	114980000	97930000	108360000	102300000
MEDP0575	5-amino-1-[3,4-dihydroxy-5-(hydroxymethyl)oxolan-2-yl]imidazole-4-carboxamide	Nucleotide And Its metabolomics	Nucleotide and Its metabolomics	259.096	258.096	[M+H]+	C9H14N4O5	B	89802	145030	106250	191720	215660	89132	126960	753200	102620	122490	142830	135540	63641	65052	48550	82194	51770	61365	77278	103200	100880	73220	62494	70903	861340	565070	1035900	595330	759730	836020	141900	143820	130720	153630	125510	73746	88263	78500	134330	163700	101880
MEDP0593	Thioguanine	Nucleotide And Its metabolomics	Nucleotide and Its metabolomics	168.027	167.027	[M+H]+	C5H5N5S	B	9	9	9	9	9	9	9	9	9	9	9	9	11278	9558.7	18071	10057	9	22201	66360	67991	77774	77089	62589	34919	325730	271790	285450	271650	299210	376030	223370	214040	182530	171950	209830	180190	30364	62972	39975	47748	55651
MEDP0877	Cytidine 5'-Diphosphocholine	Nucleotide And Its metabolomics	Nucleotide and Its metabolomics	489.2	488.107	[M+H]+	C14H26N4O11P2	A	893290	578020	795980	545020	482840	1027400	2655700	1905300	1953700	1990800	1981400	2183300	1592600	1626800	1999000	1922300	3506700	1449600	3845000	2921400	3425100	3036300	3471000	1666300	6358400	4658900	6575200	5644000	5700200	7795300	1769700	1626600	1887800	1722000	1789100	1825700	946120	1128900	894190	794760	809370
MEDP0881	Phosphocholine	Nucleotide And Its metabolomics	Nucleotide and Its metabolomics	185.1	184.074	[M+H]+	C5H15NO4P	B	9899100	8584400	8212200	8044600	8730400	10145000	17650000	15786000	15913000	17229000	15963000	16454000	15086000	15058000	16546000	15038000	16208000	13774000	20868000	18866000	21166000	20622000	18983000	14193000	15537000	18261000	15711000	16143000	15672000	16079000	14505000	13557000	13101000	13134000	13300000	13334000	19649000	19524000	18897000	19087000	19096000
MEDP0888	2'-Deoxycytidine 5'-Diphosphate	Nucleotide And Its metabolomics	Nucleotide and Its metabolomics	388.2	387.023	[M+H]+	C9H15N3O10P2	B	2702100	2738300	2061800	2892900	2599400	3304000	2081900	2188900	2284500	2243500	2218800	2430200	2355800	2811200	3355500	3288700	3196500	2573500	4064500	3198000	2881600	3137000	3081500	3381600	2849400	2684800	2513600	2539900	2640800	2807900	3592200	3879500	4350500	3386600	3653000	2982300	2872000	3007400	2764200	2884600	3252400
MEDP0899	3-Methyladenine	Nucleotide And Its metabolomics	Nucleotide and Its metabolomics	150.3	149.07	[M+H]+	C6H7N5	A	9	9	9	9	9	9	21972	4070.3	23694	15509	12743	20317	13107	15027	9940.5	16991	14208	18691	18917	11826	13863	8329.5	7562.1	38838	75996	134390	107650	89749	70592	62935	7852	20150	19525	10432	7471.8	5755	58448	39109	41134	21402	19746
MEDP1018	5'-Deoxyadenosine	Nucleotide And Its metabolomics	Nucleotide and Its metabolomics	252	251.102	[M+H]+	C10H13N5O3	B	35991	25729	22442	34382	87124	32475	52076	704890	115100	2033500	596450	1702200	233360	929190	1630000	1206800	642110	831700	132070	178060	247180	167590	173250	895370	1274000	1101600	2332700	1905700	704810	709970	129520	52070	156780	117590	77020	44035	100090	75025	62484	250300	164320
MEDP1072	7-methylguanosine	Nucleotide And Its metabolomics	Nucleotide and Its metabolomics	298.1	297.107	[M+H]+	C11H15N5O5	A	339490	414280	346630	233870	393010	239290	2087500	1521900	2983600	1739300	1550500	1863000	2569400	3194500	2664200	3982300	3317400	2723500	2684000	2665300	2299600	2880400	1992500	3596500	3465000	4561600	3496300	3797000	3338700	3544100	30209000	29686000	39736000	32368000	40472000	30236000	1634800	1940400	1308200	1113600	813240
MEDP1073	6-O-methylguanine	Nucleotide And Its metabolomics	Nucleotide and Its metabolomics	166.063	165.065	[M+H]+	C6H7N5O	A	39363	46951	27389	46783	79068	38148	1460400	869280	2359400	1215000	1081400	940540	325230	179430	181320	214870	260040	468460	224270	201520	501840	204000	697700	232970	16116000	13450000	16092000	15307000	15008000	12571000	10368000	10437000	15446000	10555000	12569000	9473400	14531000	12428000	10518000	8838100	9791100
MEDP1077	2'-O-methyladenosine	Nucleotide And Its metabolomics	Nucleotide and Its metabolomics	348.1	281.112	[M+H]+	C11H15N5O4	B	147310000	288510000	265180000	259530000	250880000	236350000	307030000	327130000	307560000	318870000	311740000	302650000	18402000	11823000	14001000	15037000	14964000	21213000	19870000	27171000	38084000	26328000	25349000	13436000	287320000	307630000	306020000	311030000	339470000	272070000	274440000	340830000	323810000	298480000	333670000	299300000	106570000	63411000	81735000	99556000	105120000
MEDP1083	Oxypurinol	Nucleotide And Its metabolomics	Nucleotide and Its metabolomics	153	152.033	[M+H]+	C5H4N4O2	A	140880	347410	344950	193040	300690	118280	8428000	7509400	6820500	12579000	3730600	7079400	247150	191960	248540	150280	175870	223470	72480	42342	15684	37237	47936	166850	253890	287430	274240	401130	283230	287930	122670	199210	140640	78474	99690	71259	234780	266970	426350	232410	305080
MEDP1093	Allopurinol	Nucleotide And Its metabolomics	Nucleotide and Its metabolomics	137.048	136.038	[M+H]+	C5H4N4O	A	15994000	12706000	9347100	7026500	13408000	7488000	104370000	90879000	94433000	92261000	63629000	68478000	3579100	6007800	4077900	5672200	6557700	4489000	15890000	9941200	18860000	20034000	23999000	5679900	7821400	6833900	11108000	7088200	10522000	8142100	12464000	13306000	16017000	16130000	17669000	16982000	5539100	6416500	6857800	5811000	5017500
MEDP1100	2-Aminomethylpyrimidine (hydrochloride)	Nucleotide And Its metabolomics	Nucleotide and Its metabolomics	110.063	109.064	[M+H]+	C5H7N3	A	4721800	4026300	5987500	4068600	4200600	5720300	4763200	5449700	5888600	5057300	5051300	5092300	4770900	5232100	4773200	5557200	5223300	4866600	13747000	15368000	16391000	15340000	14117000	5083700	17441000	16912000	17430000	19344000	18763000	20662000	876790	625530	732260	646360	595630	758530	8953700	6808100	7778000	7790700	5949200
MEDP1162	1-Methylguanine	Nucleotide And Its metabolomics	Nucleotide and Its metabolomics	166.071	165.065	[M+H]+	C6H7N5O	B	111630	136470	109120	112650	149280	105370	3390100	2008600	4933500	2800300	2160700	1945900	807930	462190	462590	493220	609950	1320700	475350	550680	1538400	415060	1843800	486620	31699000	29577000	35911000	34148000	31965000	27832000	22348000	23768000	35634000	22485000	25910000	19722000	39404000	30313000	27187000	23380000	26201000
MEDP1202	5'-deoxy-5'-fluoroadenosine	Nucleotide And Its metabolomics	Nucleotide and Its metabolomics	270.1	269.092	[M+H]+	C10H12FN5O3	A	859660	776390	531640	636900	868650	687090	3442200	3685300	1897400	3485500	3106300	2847900	64322	92902	95954	83011	94423	119550	1572300	1676600	2300000	1778400	1937100	71065	43331000	47689000	41105000	44112000	41631000	36994000	321350	422720	642200	578430	464100	436340	315510	207680	339600	381670	441330
MEDP1276	Guanine	Nucleotide And Its metabolomics	Nucleotide and Its metabolomics	152.1	151.049	[M+H]+	C5H5N5O	A	883170	2134500	1013800	847350	1253200	794680	1632500	1711100	2291700	1669700	1658500	1468600	445520	543170	351010	458330	537120	442030	1540700	1208200	1412600	1488800	1415100	496760	6488200	5213600	4095600	6869700	5471000	4808700	1452900	1493700	1296300	1483700	1810400	1599800	626720	1022300	811770	446050	495090
MEDP1295	Cytarabine	Nucleotide And Its metabolomics	Nucleotide and Its metabolomics	244.083	243.086	[M+H]+	C9H13N3O5	B	4144900	14883000	11950000	8908100	7631100	4615800	367210	516820	753520	442640	451710	542940	148890	307880	251600	280250	293110	212640	943680	1218700	933330	2155700	2467900	342120	17619000	16566000	14789000	15199000	16486000	9961200	357910	358990	479780	322180	379140	293770	490910	1222600	864920	518650	521630
MEDP1493	N6-methyladenosine	Nucleotide And Its metabolomics	Nucleotide and Its metabolomics	282	281.112	[M+H]+	C11H15N5O4	B	9	9	9	9	9	9	85335	77021	262580	161550	145710	196850	305220	351140	211750	325030	249100	298430	228030	229960	306890	232530	207810	346650	329220	230830	142090	211820	146400	162060	649510	643300	1009600	686400	564410	564050	140360	272860	154750	179500	116470
MEDP1498	8-Azaguanine	Nucleotide And Its metabolomics	Nucleotide and Its metabolomics	153	152.11	[M+H]+	C4H4N6O	B	92192	352680	223530	206230	210180	88000	4799100	3885400	4808100	6215000	2616400	4798600	102890	98313	113090	77333	78529	105390	125150	81867	77434	101070	97826	105620	818980	734840	629370	941280	658080	861130	132230	145420	106540	184960	184340	220890	181090	192140	219350	105040	115460
MEDP1501	Isocytosine	Nucleotide And Its metabolomics	Nucleotide and Its metabolomics	112	111.1	[M+H]+	C4H5N3O	B	1391300	5321700	4350300	3403000	2957700	1496400	9	9	9	9	9	9	81855	182460	136910	193610	138110	198720	525140	406700	470750	848230	866080	140090	13580000	11217000	9559100	12501000	13008000	8109400	389530	366300	509730	522570	332080	361470	311500	762140	505970	347940	252710
MWC10139303	(6S)-6beta-Hydroxy-1,4,5,6-tetrahydronicotinamide-adenine dinucleotide;(S)-NADH-hydrate;(S)-NADHX;(6S)-6-Hydroxy-1,4,5,6-tetrahydronicotinamide-adenine dinucleotide;6beta-Hydroxy-1,4,5,6-tetrahydronicotinamide-adenine dinucleotide	Nucleotide And Its metabolomics	Nucleotide and Its metabolomics	682.115	683.135	[M-H]-	C21H31N7O15P2	B	3850.9	104030	16164	16279	49767	16489	24910	24943	18495	23970	24767	24128	9	9	9	9	9	9	10659	12439	16106	11225	20446	9	44804	54768	47101	32896	63223	24860	9	9	5213.7	8528.3	4436	17912	44826	40447	30255	33660	44441
MWC10142964	1,3-Dimethyluracil	Nucleotide And Its metabolomics	Nucleotide and Its metabolomics	141.066	140.059	[M+H]+	C6H8N2O2	A	9	9	9	9	9	9	9	9	9	9	9	9	11384000	10550000	8812300	9578700	12367000	9552200	48787	53622	23439	21583	20097	10255000	9	9	9	9	9	9	9	9	9	9	9	9	45425	9	11997	28453	33237
MWC10008661	5'-Phosphoribosyl-N-formylglycinamide	Nucleotide And Its metabolomics	Nucleotide and Its metabolomics	359.016	314.052	[M-H+2Na]+	C8H15N2O9P	B	322700	318870	505960	469900	497670	468320	641550	733510	664890	765600	694790	655370	220220	249880	291090	256550	256190	281080	430300	362320	511880	516990	551300	254070	139200	198250	192430	168750	154490	190520	326220	326120	360840	326500	299060	347320	201360	179570	193750	190690	171720
MWC10137758	CoA;Coenzyme A;CoA-SH	Nucleotide And Its metabolomics	Nucleotide and Its metabolomics	382.552	767.115	[M-2H]-	C21H36N7O16P3S	B	9	9	9	9	9	9	411090	217320	173480	215530	126010	144100	9	9	9	9	9	9	19513	9	9	9	9	9	78389	36569	79827	106760	37610	56502	57108	77597	82840	62745	69977	50994	9	9	9	9	9
MWC10138732	dTDP-galactose;dTDP-D-galactose	Nucleotide And Its metabolomics	Nucleotide and Its metabolomics	563.067	564.076	[M-H]-	C16H26N2O16P2	B	702450	537030	755070	639530	708930	789980	217060	255670	114570	155920	169790	233150	1651600	1205400	1588200	1467000	2648000	1325600	882850	839720	895640	835930	897860	973140	1832400	992490	1171500	1579400	1364800	1218200	1019900	890960	895200	935390	1002300	883050	422020	423060	474390	517950	574280
MWC10149001	GUANOSINE 5'-DIPHOSPHATE	Nucleotide And Its metabolomics	Nucleotide and Its metabolomics	442.015	443.024	[M-H]-	C10H15N5O11P2	B	36508	33220	64274	46936	38249	60279	145830	195640	203420	113900	177680	185600	27429	32517	32819	32284	50393	46288	31356	27118	46469	62299	56495	58167	36034	31843	29982	15084	33368	27919	371560	421260	420680	374260	434970	422190	51667	33944	30247	34876	22950
MWC10013827	L-2-Aminoadipate adenylate;5-Adenylyl-2-aminoadipate;alpha-Aminoadipoyl-C6-AMP	Nucleotide And Its metabolomics	Nucleotide and Its metabolomics	559.111	490.121	[M+Na+HCOOH]+	C16H23N6O10P	B	43144	154770	180490	141300	173570	122660	339770	282060	426250	323470	344350	277910	9366.7	10346	12356	10093	15097	5794.5	9	20288	27909	9483.1	7129.4	10458	4881.9	44098	66685	21316	41754	30005	118920	262240	224870	199290	254610	206460	17861	8339.2	14554	23860	6591.5
MWC10147853	N-6-(delta-2-Isopentenyl)adenosine hemihydrate	Nucleotide And Its metabolomics	Nucleotide and Its metabolomics	358.149	335.159	[M+Na]+	C15H21N5O4	A	75041000	53530000	59109000	56015000	55264000	64587000	18248	9	41286	17757	8347.4	9	61888	145050	92266	69871	60073	42883	122220	97427	80146	106070	94059	131410	35813	19220	5484.2	9147.3	10969	12162	18711	19147	26523	16190	35971	31051	13260	12368	27262	19571	16951
MWC10139557	Propionyladenylate;Propionyl-adenosine monophosphate	Nucleotide And Its metabolomics	Nucleotide and Its metabolomics	404.097	403.089	[M+H]+	C13H18N5O8P	B	441670	298870	145430	442280	380070	220080	9	9	9	9	9	9	9	9	9	9	9	9	9	9	9	9	9	9	9	9	9	9	9	9	9	9	9	9	9	9	9	9	9	9	9
MWC10138662	Reduced FMN;FMNH2	Nucleotide And Its metabolomics	Nucleotide and Its metabolomics	423.104	458.12	[M+H-2H2O]+	C17H23N4O9P	A	410650	400480	269680	345850	397080	390180	176660	199810	252430	296440	265880	209030	320650	352090	378280	345060	272190	297690	353190	364910	344120	357620	359700	254200	438930	409040	394720	390920	404890	457500	276830	324530	258820	333560	299620	277400	568650	569400	555140	640220	615100
MWC10010574	S-Adenosylmethioninamine	Nucleotide And Its metabolomics	Nucleotide and Its metabolomics	374.161	355.155	[M+F]-	C14H23N6O3S	B	97115	175880	49604	86306	86819	56071	9	9	9	9	9	9	9	9	9	9	9	9	9	9	9	9	9	9	9	9	9	9	9	9	9	9	9	9	9	9	9	9	9	9	9
MWC10012878	Se-Adenosyl-L-selenohomocysteine	Nucleotide And Its metabolomics	Nucleotide and Its metabolomics	448.083	432.066	[M-H+NH3]-	C14H20N6O5Se	A	1066100	1145300	687010	908930	1010500	1015900	518790	564570	455240	532420	572850	388800	1031600	1209000	1089600	1180200	861360	1063300	741360	966490	912480	936670	852350	1203500	231660	50524	86092	128930	106330	57355	231820	207960	198130	289280	278730	214320	2537800	2575600	2549100	2288800	1853900
MWC10014391	UDP-xylose	Nucleotide And Its metabolomics	Nucleotide and Its metabolomics	583.062	536.044	[M+H+HCOOH]+	C14H22N2O16P2	A	144640	421730	227230	351350	371820	319110	56114	51149	77488	52679	31210	34509	7790.5	24202	14285	11230	5034.6	14524	26196	53473	51488	30683	41956	13640	150020	134200	104200	100490	110700	116790	6773.1	21791	25734	18088	36259	15653	190190	176810	176360	353560	345440
MWC10013588	CMP-N-trimethyl-2-aminoethylphosphonate	Nucleotide And Its metabolomics	Nucleotide and Its metabolomics	454.106	473.12	[M-H-H2O]-	C14H27N4O10P2	B	29545	29290	23842	40587	32804	29639	7954.2	15157	21613	13678	18393	20979	12114	12065	15922	15822	7675.2	13322	12716	13871	7961.8	12322	9295	13678	13748	11286	9795.2	8662.3	12913	12579	11584	12194	10953	17322	10024	12530	19547	19669	13326	18626	15168
MWC10149206	Cytidine 5'-triphosphate	Nucleotide And Its metabolomics	Nucleotide and Its metabolomics	481.978	482.985	[M-H]-	C9H16N3O14P3	B	297250	292860	290430	231430	220170	407060	35820	46016	18867	40955	33421	55046	4861900	6940200	4657800	5448200	8272700	6976300	1454300	1281000	1130500	1244600	1193400	6777100	3485700	6425900	3715600	3645000	6169200	3169200	23041000	18119000	18803000	18426000	17101000	17741000	39734000	40545000	33126000	29252000	26288000
MEDN0032	Allantoin	Organic acid And Its derivatives	Organicacid and Its derivatives	157.036	158.044	[M-H]-	C4H6N4O3	A	2825400	3297300	3532200	3492400	3407100	3402000	12639000	12038000	15507000	16147000	13848000	11725000	9	9	9	9	9	9	3999100	3845000	4113000	3329900	3316100	1879700	17945000	22989000	18715000	16845000	19164000	16805000	5159300	6038100	6166100	6228000	6776500	6297200	9	9	9	9	9
MEDN0198	Citric Acid	Organic acid And Its derivatives	Organicacid and Its derivatives	191.019	192.027	[M-H]-	C6H8O7	A	71432000	56319000	28116000	39088000	52896000	54440000	125490000	116310000	119210000	111660000	127280000	106160000	116440000	116690000	83573000	108390000	110240000	94505000	104450000	141300000	126360000	145670000	128800000	156310000	52094000	82441000	66643000	63190000	50617000	58184000	310720000	340100000	326360000	296750000	358390000	349550000	79766000	85527000	65197000	86256000	67598000
MEDN0201	Succinic Acid	Organic acid And Its derivatives	Organicacid and Its derivatives	117.019	118.027	[M-H]-	C4H6O4	A	45384000	42003000	41113000	39219000	40269000	40204000	36659000	45286000	71412000	66082000	39564000	68963000	27656000	30235000	24059000	28126000	23307000	24160000	31361000	31897000	29692000	30596000	38634000	35668000	80225000	86266000	98426000	71710000	100970000	94731000	214210000	196270000	221430000	186070000	224180000	205520000	50070000	49066000	53782000	55794000	47377000
MEDN0202	A-Ketoglutaric Acid	Organic acid And Its derivatives	Organicacid and Its derivatives	145.014	146.022	[M-H]-	C5H6O5	B	965250	492590	360980	422370	615570	538800	3488200	1872600	1905400	2924000	2280900	2231300	95180	188610	158370	211850	180890	152470	1451500	1689500	1447800	1296000	1428800	122440	1893200	1156000	1309400	1603300	767160	1703900	1417000	734350	1644800	1377700	784590	1210400	479580	309560	368190	563750	453790
MEDN0203	Cis-Aconitic Acid	Organic acid And Its derivatives	Organicacid and Its derivatives	173.009	174.016	[M-H]-	C6H6O6	A	9	9	9	9	9	9	9	9	9	9	9	9	13614	23526	10505	16946	12284	20276	9	9	9	9	9	9	9	9	9	9	9	9	9	9	9	9	9	9	9	9	9	9	9
MEDN0204	Pyruvic Acid	Organic acid And Its derivatives	Organicacid and Its derivatives	87.0082	88.016	[M-H]-	C3H4O3	A	9	9	9	9	9	9	169500	129090	155400	93459	149340	84095	9	9	9	9	9	9	12069	14168	14425	10872	29954	8924.1	16011	10103	6262.6	10853	17624	17740	16720	9241.8	12380	33296	24444	40699	9	9	9	9	9
MEDN0206	Citramalic Acid	Organic acid And Its derivatives	Organicacid and Its derivatives	147.029	148.1	[M-H]-	C5H8O5	B	390500	225820	155840	156690	243700	316830	3730600	1636000	3790000	1939400	1249500	1568600	765010	933030	608310	546820	560460	673800	713160	858420	621090	804120	739750	1109800	397850	437320	710750	559900	582000	583050	1429800	1388400	1485900	1519500	1565000	1362900	687770	711840	968470	920640	768700
MEDN0262	5,6-Dihydroxy-1H-indole-2-carboxylic acid	Organic acid And Its derivatives	Organicacid and Its derivatives	192	193.038	[M-H]-	C9H7NO4	A	185900	668660	255490	228390	218340	83124	46477	31838	49492	39562	30895	71197	70418	111210	62809	85477	35065	56908	549490	547280	545260	455540	535480	91726	237130	198280	215720	273310	252230	257530	58358	80363	58700	64170	66115	51674	619250	478220	580420	724390	894500
MEDN0276	1-Naphthylacetic Acid	Organic acid And Its derivatives	Organicacid and Its derivatives	185.06	186.068	[M-H]-	C12H10O2	A	103510	126520	90959	89910	128980	107100	104750	98535	82172	111560	74126	66895	106900	80472	63586	86469	134850	117250	87533	66484	80429	85136	65813	84013	74109	80209	117260	155400	89602	80063	97113	82110	84805	100150	74923	122350	74416	77761	83353	111430	77401
MEDN0280	2-Aminoethanesulfonic Acid	Organic acid And Its derivatives	Sulfonic acids	124.007	125.015	[M-H]-	C2H7NO3S	A	258950000	235870000	255670000	264700000	237130000	269690000	433810000	430950000	435830000	445080000	420630000	431020000	128540000	116550000	113680000	127190000	134150000	114600000	128470000	116030000	134220000	111500000	107440000	126680000	294400000	318810000	294640000	288920000	304460000	300220000	292160000	285130000	268400000	279070000	269660000	260500000	24668000	24823000	17678000	20326000	21117000
MEDN0282	2–Furanoic Acid	Organic acid And Its derivatives	Organicacid and Its derivatives	111.008	112.016	[M-H]-	C5H4O3	A	18565	25357	19732	27498	26192	11517	9	9	9	9	9	9	9	9	9	9	9	9	9	9	9	9	9	9	14390	29355	19658	27198	27330	18262	9	9	9	9	9	9	20951	26994	21388	17654	9
MEDN0283	2-Hydroxybutanoic Acid	Organic acid And Its derivatives	Organicacid and Its derivatives	103.04	104.047	[M-H]-	C4H8O3	A	39661	43803	30823	34580	34538	37915	584820	327670	418930	567210	507150	505600	197180	120580	118170	119770	200780	151650	41237	36362	36145	47264	52508	115550	200760	226520	316300	294390	317200	133250	96500	77930	171900	99225	81029	84595	263690	356910	242520	236100	176720
MEDN0284	2-Hydroxyisocaproic Acid	Organic acid And Its derivatives	Organicacid and Its derivatives	131.071	132.079	[M-H]-	C6H12O3	A	30073	27128	20077	22434	30234	38027	909060	6444900	1035000	714380	969330	672680	417920	87859	62442	46106	146310	592730	27829	21674	23852	37969	35131	114970	59148	69645	104560	55780	77756	87009	268260	58357	58679	34880	38073	37073	31757	23556	25738	27859	21526
MEDN0285	2-Methylsuccinic Acid	Organic acid And Its derivatives	Organicacid and Its derivatives	131.034	132.042	[M-H]-	C5H8O4	A	21165000	944630	1501200	7940100	4633100	9941700	496900	459890	806790	497550	628980	523120	3136200	1323600	1118700	1106700	2447700	2505900	142120	216650	155780	216930	215370	1491900	355640	412450	303120	311470	444780	146670	403400	301600	391890	313550	415740	357000	317370	418600	388940	378640	352470
MEDN0287	3,5-Dimethoxy-4-Hydroxycinnamic Acid	Organic acid And Its derivatives	Organicacid and Its derivatives	223.061	224.069	[M-H]-	C11H12O5	A	21825	39402	32811	21763	80052	45293	9	9	9	9	9	9	23907	41280	126450	46381	88973	84007	9	9	9	9	9	9	9	9	9	9	9	9	9	9	9	9	9	9	14601	12454	7805.4	5889.4	7982.5
MEDN0290	3-Hydroxy-3-Methyl Butyric Acid	Organic acid And Its derivatives	Organicacid and Its derivatives	117.055	118.063	[M-H]-	C5H10O3	A	67706	86749	57658	72332	83189	81974	1386800	2257400	2141000	1674800	1430400	958380	379280	214340	280660	150930	329630	412170	89560	78464	89969	96851	71140	235230	255820	161890	145140	277130	520310	459460	341120	147900	228530	101360	182950	142380	138640	119880	118340	118830	96951
MEDN0292	3-Hydroxybutyrate	Organic acid And Its derivatives	Organicacid and Its derivatives	103.04	104.047	[M-H]-	C4H8O3	A	165310	243430	185310	196240	137890	190000	250770	167570	231900	302070	181170	262690	556650	398680	390730	276260	307300	1673700	305300	288120	308430	361290	227260	467280	298010	338220	234660	311120	270020	296880	519720	485270	517620	447870	471640	533580	228470	131880	162340	236290	206600
MEDN0293	3-Hydroxypropanoic Acid	Organic acid And Its derivatives	Organicacid and Its derivatives	89.0239	90.032	[M-H]-	C3H6O3	A	9	9	9	9	9	9	18818	19188	19773	9644.4	19043	25786	35601	40107	16771	25990	61617	255100	8819.4	9	9503.1	10979	8804.9	33728	42671	21034	33272	39948	42746	38543	21445	31988	27640	24096	23184	21070	62518	86920	47735	74844	47279
MEDN0294	3-Methylcrotonyl Glycine	Organic acid And Its derivatives	Organicacid and Its derivatives	156.066	157.074	[M-H]-	C7H11NO3	A	9	9	9	9	9	9	9	9	9	9	9	9	130250	189190	181130	268530	99595	122280	9	9	9	9	9	9	9	9	9	9	9	9	10725	8570.4	8395.4	24762	17150	15605	9	9	9	9	9
MEDN0296	4-Guanidinobutyric Acid	Organic acid And Its derivatives	Organicacid and Its derivatives	144.077	145.085	[M-H]-	C5H11N3O2	B	2343600	3354500	2896500	3095000	2722600	3196600	2864200	2487000	3281000	2405400	2916300	3119700	1231800	1200400	1169700	1317300	1204900	1031400	4322200	4049000	4074300	3822300	3652000	1377800	207150	396310	303480	249700	341720	241310	1653900	1755300	1747900	1414200	1779200	1935700	524490	399510	395840	505260	300510
MEDN0298	4-Oxopentanoate	Organic acid And Its derivatives	Organicacid and Its derivatives	115.04	116.047	[M-H]-	C5H8O3	A	11002	13128	9680	15681	9462.3	13336	15242	21397	27568	24838	20294	20951	10612	9669.5	11545	10693	7383.7	10094	9	15273	16995	8979.8	8002.9	11274	21672	25547	27329	24026	23995	15562	14234	14209	12785	6671.7	13497	11746	13010	12503	14572	7313.3	10341
MEDN0299	Adipic Acid	Organic acid And Its derivatives	Organicacid and Its derivatives	145.05	146.058	[M-H]-	C6H10O4	A	211340	157490	105510	130040	192640	166180	247590	248650	226160	264410	276220	482660	245940	225920	281900	240840	285680	353500	171960	308130	292890	222530	217260	271660	262730	290480	185780	245970	173090	182820	456140	381030	476000	335480	399000	356320	959830	208290	164880	266620	319330
MEDN0300	Azelaic Acid	Organic acid And Its derivatives	Organicacid and Its derivatives	187.097	188.105	[M-H]-	C9H16O4	A	13450000	7153100	3966100	8327500	7684400	9270000	8131800	6256800	7214700	5584200	6303900	7971700	2985400	2641600	2892800	2648200	3541100	3332700	6186500	7315400	4850700	8468000	8194300	2784600	5718100	5776100	4120700	4810000	3747500	5265500	6102900	6979700	6949100	4132300	5750000	4201100	5498100	7896600	6311800	4546900	7628900
MEDN0301	Caffeic Acid	Organic acid And Its derivatives	Organicacid and Its derivatives	179.034	180.042	[M-H]-	C9H8O4	A	43302	72957	27641	43558	207100	39658	42871	23505	77289	33116	61416	153790	99244	484190	965410	353130	251690	582680	3403800	2341700	2153500	2703200	2637700	592630	9	9	9	9	9	9	9	9	9	9	9	9	9	9	9	9	9
MEDN0305	Creatine	Organic acid And Its derivatives	Organicacid and Its derivatives	130.062	131.07	[M-H]-	C4H9N3O2	B	3813800	4073100	4511100	4845000	4280600	4673400	380590	425380	519440	393480	412670	479560	95774	87835	124710	113620	96746	84186	306700	317750	341440	303580	284140	91783	917780	1708500	1342200	1045000	1631300	1245800	9	22248	17762	9	14707	17177	9	9	9	9	9
MEDN0314	Glutaric Acid	Organic acid And Its derivatives	Organicacid and Its derivatives	131.034	132.042	[M-H]-	C5H8O4	A	21165000	944630	1501200	7940100	4633100	9941700	496900	459890	806790	497550	628980	523120	3136200	1323600	1118700	1106700	2447700	2505900	142120	216650	155780	216930	215370	1491900	355640	412450	303120	311470	444780	146670	403400	301600	391890	313550	415740	357000	317370	418600	388940	378640	352470
MEDN0316	Guanidinoethyl Sulfonate	Organic acid And Its derivatives	Sulfonic acids	166.029	167.037	[M-H]-	C3H9N3O3S	A	342480	460060	404010	395050	374460	417750	2914300	2652900	2750800	2500700	3067300	2168000	722100	313230	297280	299920	683940	653790	86928	69267	99242	70585	74221	302770	1085600	1667500	1036400	897900	1726400	975690	1065600	867340	856940	782250	741320	790470	144260	115150	117020	105320	108140
MEDN0317	Hippuric Acid	Organic acid And Its derivatives	Organicacid and Its derivatives	178.05	179.058	[M-H]-	C9H9NO3	A	61775	361210	35940	238880	126330	49878	26103	26801	56115	21380	42180	17377	38225	36734	33360	60105	97668	57837	33580000	24083000	21646000	27225000	26829000	32041	9	9	9	9	9	9	58356	25114	85171	76116	105210	44128	17862	26426	28750	22017	22870
MEDN0320	Hydrocinnamic Acid	Organic acid And Its derivatives	Organicacid and Its derivatives	149.06	150.068	[M-H]-	C9H10O2	A	17954	25076	15373	17111	33635	21877	9	10456	9	26972	9872	9	17742	19047	11672	14228	12411	11026	26020	9876.9	11559	14933	19167	13593	22034	36538	19027	27511	20968	16547	10738	9181.4	8263.3	9	8931.8	9350.5	18251	14253	13697	13619	12730
MEDN0325	L-Lactic Acid	Organic acid And Its derivatives	Organicacid and Its derivatives	89.0239	90.0317	[M-H]-	C3H6O3	A	26318	20323	21801	15711	23455	22205	104740	77988	127550	99087	94304	85713	34578	31610	17000	19992	29517	27341	14742	15605	9144.9	17724	18922	23575	24784	25540	71338	31242	21162	32149	37235	10722	62998	22676	41613	20764	13628	15155	10390	14727	24574
MEDN0326	L-Tartaric Acid	Organic acid And Its derivatives	Organicacid and Its derivatives	149.009	150.016	[M-H]-	C4H6O6	A	9	9	9	9	9	9	26657	34768	21829	41806	29665	34036	19864	24784	11417	8575	15220	12414	8938.2	10763	19750	8141.6	15402	5101.6	5874	10555	12417	14806	9	6131.5	116290	61257	51992	92912	85680	107480	13834	7886.6	5034.8	16353	14246
MEDN0327	L-Dihydroorotic Acid	Organic acid And Its derivatives	Organicacid and Its derivatives	157.025	158.033	[M-H]-	C5H6N2O4	A	250360	238400	221350	228940	223620	255490	325260	308430	305800	308920	304010	323740	372440	382930	352390	396300	375220	385610	304870	325150	312850	320440	319130	391810	272050	294290	282580	293370	266790	252400	469110	457330	473320	476180	475480	465010	315520	334840	331690	312290	299890
MEDN0328	L-Homoserine	Organic acid And Its derivatives	Organicacid and Its derivatives	118.05	119.058	[M-H]-	C4H9NO3	A	1682500	1505600	1236600	1506100	1778100	1881900	666220	584860	1043300	596570	635470	737150	790840	1047000	512700	927070	703550	589480	4169100	6294700	5096600	4919200	4770400	1202600	1550200	1734400	1947600	1865800	1980400	2161900	1215300	1181900	1030500	1329600	1075300	1196400	696440	992240	1102900	1391800	850530
MEDN0333	Malonicacid	Organic acid And Its derivatives	Organicacid and Its derivatives	103.003	104.011	[M-H]-	C3H4O4	A	187680	266340	143770	143780	196120	170800	292860	211490	183130	212670	178250	243960	606670	391980	348480	246450	314000	1785500	316210	273610	239940	431750	271970	490830	319450	383280	322130	371790	337900	331600	498930	430420	477970	497010	429460	545480	250750	119210	148360	273060	218080
MEDN0334	Mandelic Acid	Organic acid And Its derivatives	Organicacid and Its derivatives	151.04	152.047	[M-H]-	C8H8O3	A	20028	17984	9	27192	34919	24659	95115	72899	108930	94667	75919	74062	9	28583	22874	18193	27374	50068	47174	77111	37105	54599	87019	27384	145960	21656	74978	75565	24498	22458	184480	110410	145490	147140	155140	143330	50913	28381	58145	40371	35678
MEDN0335	Methylmalonic Acid	Organic acid And Its derivatives	Organicacid and Its derivatives	117.019	118.027	[M-H]-	C4H6O4	A	45384000	42003000	41113000	39219000	40269000	40204000	36659000	45286000	71412000	66082000	39564000	68963000	27656000	30235000	24059000	28126000	23307000	24160000	31361000	31897000	29692000	30596000	38634000	35668000	80225000	86266000	98426000	71710000	100970000	94731000	214210000	196270000	221430000	186070000	224180000	205520000	50070000	49066000	53782000	55794000	47377000
MEDN0338	Phenyllactate(Pla)	Organic acid And Its derivatives	Organicacid and Its derivatives	165.055	166.063	[M-H]-	C9H10O3	A	12139	8957.9	7073	12817	20203	15545	123570	129440	233000	134430	181910	146910	168920	18211	24615	9419.5	47204	107930	26402	23424	39654	22689	24688	16941	13128	32005	24429	9847.1	8375	13229	84459	354650	82617	19973	19243	11407	7111.2	7807.8	8305.3	10543	8758.7
MEDN0339	Phenylpyruvic Acid	Organic acid And Its derivatives	Organicacid and Its derivatives	163.04	164.047	[M-H]-	C9H8O3	A	35898	32904	37009	34034	47874	48738	1177600	516560	842250	436600	437760	1154900	9	9	9	9	9	9	118260	113010	307600	121430	105190	9	29244	78388	37075	19370	62999	60978	9	9	9	9	9	9	9	9	9	9	9
MEDN0340	Pyrrole-2-Carboxylic Acid	Organic acid And Its derivatives	Organicacid and Its derivatives	110.024	111.032	[M-H]-	C5H5NO2	A	23569	17862	18182	17048	17256	26910	174950	4764400	308810	152320	302760	142630	15463	8451.2	58478	9	9	9	23423	23522	23524	28164	32224	11732	31623	32443	21114	20330	21143	26634	208220	184570	352380	404150	487120	249440	26928	30326	27758	25388	36446
MEDN0343	Shikimic Acid	Organic acid And Its derivatives	Organicacid and Its derivatives	173.045	174.053	[M-H]-	C7H10O5	A	371050	473800	186790	415900	290990	208870	97473	122590	199820	617300	296150	216590	439250	233410	367350	573610	1123800	508990	1599800	2300000	1382600	1920000	2220300	334190	17177	62798	53970	102010	22872	12723	15401	25058	34552	9151.8	19155	19848	9	9	9	9	9
MEDN0344	Subericacid	Organic acid And Its derivatives	Organicacid and Its derivatives	173.081	174.089	[M-H]-	C8H14O4	A	273710	193650	136490	221160	221080	226460	381080	451390	354570	376030	349710	462910	150500	127270	153200	133280	164920	217410	149360	194140	177120	183210	205530	127940	332270	258100	175090	210230	174060	208250	1535700	1773300	1805000	1704900	2376000	1840900	640380	362400	340180	299850	383460
MEDN0403	Urocanic Acid	Organic acid And Its derivatives	Organicacid and Its derivatives	137.035	138.043	[M-H]-	C6H6N2O2	A	232930	221640	367140	236450	227880	292410	312950	308600	348200	277330	367780	303970	348790	398690	304910	422790	396370	343860	1193900	1364900	1576100	1475100	1329400	400070	1150700	1094100	1103300	1090800	1180800	1209200	95791	50169	75958	67143	82804	104150	471110	353100	360600	421040	278240
MEDN0406	3-(3-Hydroxyphenyl)Propionate Acid	Organic acid And Its derivatives	Organicacid and Its derivatives	165.055	166.063	[M-H]-	C9H10O3	A	9	9	9	9	9	9	9	9	9	9	9	9	9	9	9	9	9	9	326310	155790	194490	97671	274200	9	9	9	9	9	9	9	9	9	9	9	9	9	9	9	9	9	9
MEDN0413	Ethylmalonate	Organic acid And Its derivatives	Organicacid and Its derivatives	131.034	132.042	[M-H]-	C5H8O4	A	21165000	944630	1501200	7940100	4633100	9941700	496900	459890	806790	497550	628980	523120	3136200	1323600	1118700	1106700	2447700	2505900	142120	216650	155780	216930	215370	1491900	355640	412450	303120	311470	444780	146670	403400	301600	391890	313550	415740	357000	317370	418600	388940	378640	352470
MEDN0416	Ureidoisobutyric Acid	Organic acid And Its derivatives	Organicacid and Its derivatives	145.061	146.069	[M-H]-	C5H10N2O3	A	38610	19545	10393	17689	14205	23202	9	9	9	9	9	9	133200	141940	26583	51818	82434	176530	9	9	9	9	9	9	9	9	9	9	9	9	9	9	9	9	9	9	42960	187620	77458	53592	45233
MEDN0417	(Rs)-Mevalonic Acid	Organic acid And Its derivatives	Organicacid and Its derivatives	147.066	148.074	[M-H]-	C6H12O4	A	9	9	9	9	9	9	9	9	9	9	9	9	9	9	9	9	9	9	106600	87018	108370	113310	111950	52837	9	4914.7	9	9	9	9	9	9	9	9	9	1575.2	9	9	9	9	9
MEDN0432	5-Hydroxyhexanoic Acid	Organic acid And Its derivatives	Organicacid and Its derivatives	131.071	132.079	[M-H]-	C6H12O3	A	53294	95029	55034	36940	67411	65151	126510	106150	110880	99401	101480	146150	79352	84843	67108	55406	107730	111150	98468	115190	110620	103530	107480	71108	103010	136730	94517	115680	87989	102570	303010	212270	272520	193030	177050	210440	1613100	212700	97028	128130	154270
MEDN0469	Citraconic Acid	Organic acid And Its derivatives	Organicacid and Its derivatives	129.019	130.027	[M-H]-	C5H6O4	A	9	9	9	9	9	9	233880	75038	276810	105800	103520	73948	9	9	9	9	9	9	9	9	9	9	9	9	9	9	9	9	9	9	9	9	9	9	9	9	9	9	9	9	9
MEDN0470	Oxoadipic Acid	Organic acid And Its derivatives	Organicacid and Its derivatives	159.029	160.037	[M-H]-	C6H8O5	A	84271	9	9	27684	56057	53475	1022500	244450	766000	698070	261840	291990	9	20472	27906	53823	29769	16015	110120	101200	91134	88301	171940	34035	20953	33700	9	9	99118	28636	183020	170040	214460	196810	133160	155620	63060	80491	65591	66661	47483
MEDN0478	Aminomalonic Acid	Organic acid And Its derivatives	Organicacid and Its derivatives	118.014	119.022	[M-H]-	C3H5NO4	A	1708700	1655000	1379700	1411800	1447600	1497900	1384400	1625600	2589500	2369300	1398100	2444700	971360	1146600	823720	1100800	842280	917660	1202800	1254900	1102800	1126500	1387900	1260600	2976500	3168700	3583000	2812400	3928500	3620200	8342600	7929500	8906900	7096700	8993700	8224100	1753300	1758700	1813100	1990400	1650200
MEDN0480	Dl-Glyceraldehyde 3-Phosphate	Organic acid And Its derivatives	Phosphoric acids	168.99	169.998	[M-H]-	C3H7O6P	A	691890	448960	548880	381390	355470	692740	3030600	14836000	7142500	6720300	7282100	7899500	1316400	1373900	1426200	1208900	1760400	1575700	6564300	3453700	4142700	6855700	11153000	2310300	1915900	3738200	10139000	7574700	868250	576980	28672000	4420300	22293000	15769000	8855900	11844000	9	9	9	9	9
MEDN0490	Fumaric Acid	Organic acid And Its derivatives	Organicacid and Its derivatives	115.003	116.011	[M-H]-	C4H4O4	A	59147	79741	63625	97830	75320	80440	79438	152460	107300	130510	115130	105230	81372	100180	89815	96427	86178	85624	89406	62916	86891	78554	88297	80363	126970	211550	153240	161460	147440	142300	69001	76733	77862	76956	53437	125180	87455	100130	80230	89323	69421
MEDN0499	Argininosuccinic acid	Organic acid And Its derivatives	Organicacid and Its derivatives	289.115	290.123	[M-H]-	C10H18N4O6	A	628130	2029900	1557900	593630	1140200	1092400	6834000	12182000	7306900	8958400	9025100	9711900	2528100	2905700	3238700	2909000	3433900	2710800	6604800	5273600	7049500	6068100	6480100	3057400	63578000	37553000	41875000	59341000	42063000	58284000	19119000	19330000	17257000	18983000	18309000	16027000	3437800	4130100	3519200	3024300	2709800
MEDN0528	(3-Methoxy-4-hydroxyphenyl)ethylene glycol sulfate	Organic acid And Its derivatives	Organicacid and Its derivatives	263.023	264.03	[M-H]-	C9H12O7S	A	63117	106160	127850	93499	76630	87962	9	9	9	9	9	9	9	9	9	9	9	9	9320.9	12510	26426	17967	20333	10609	9	9	9	9	9	9	9	9	9	9	9	9	9	9	9	9	9
MEDN0530	Pimelic acid	Organic acid And Its derivatives	Organicacid and Its derivatives	159.066	160.074	[M-H]-	C7H12O4	A	228370	153900	94712	202030	179740	192330	232030	186160	234030	266380	213150	251560	150680	172930	285760	241250	194930	294350	230630	245780	202970	316660	229320	193320	336500	168760	145190	162360	106350	158270	158150	137260	189520	139670	138740	114680	942640	432060	494320	289260	388570
MEDN0551	Indoleacrylic acid	Organic acid And Its derivatives	Organicacid and Its derivatives	186.056	187.063	[M-H]-	C11H9NO2	A	9	9	9	9	9	9	9	9	9	9	9	9	9	9	9	9	9	9	9	9	9	9	9	9	9	9	9	9	9	9	138210	79419	176950	183000	167590	145930	9	9	9	9	9
MEDN0555	Hydroxyphenyllactic acid	Organic acid And Its derivatives	Organicacid and Its derivatives	181.05	182.058	[M-H]-	C9H10O4	A	17172	25376	12387	24032	27545	20003	971100	603830	589580	1108000	591040	353940	32562	17565	13214	7392.8	14153	37450	60166	54501	61153	51063	44845	28750	92742	75528	170860	72907	71617	47569	64455	49542	59558	32767	29539	25670	46445	41320	58010	70458	51544
MEDN0593	D-Malic acid	Organic acid And Its derivatives	Organicacid and Its derivatives	133.014	134.022	[M-H]-	C4H6O5	A	7816300	12012000	7581300	6608500	7499000	7317700	8888900	9289400	13346000	9372800	7330700	9191900	4581800	4667500	3220900	3857300	3506200	4088900	10369000	9451300	12090000	11335000	14492000	5011800	27464000	26486000	26721000	29526000	26891000	24280000	24532000	24051000	26864000	25566000	30402000	26513000	5402500	4787100	5122100	5563400	4647700
MEDN0615	Carbamoyl phosphate	Organic acid And Its derivatives	Phosphoric acids	139.975	140.983	[M-H]-	CH4NO5P	A	374150	552610	261070	271790	269900	391180	1199000	989730	1058200	930430	1956900	1300600	2087000	2223200	1884700	2158700	3011800	2596600	5722900	3840200	3802200	4865000	3723500	2395100	8572400	13385000	10538000	9955900	11461000	6287900	10865000	10100000	10489000	10563000	11675000	9801800	23571000	18120000	15396000	17236000	18354000
MEDN0622	Porphobilinogen	Organic acid And Its derivatives	Organicacid and Its derivatives	225.088	226.095	[M-H]-	C10H14N2O4	A	380910	364510	358520	303350	268280	263620	227000	321140	302910	304400	269550	226130	320350	330920	211040	264210	232150	247320	276850	321980	298260	350960	302140	286110	383280	368800	240280	258260	369000	295590	371370	299170	301410	373790	321650	222950	276790	326550	313690	383610	286410
MEDN0651	Succinic anhydride	Organic acid And Its derivatives	Organicacid and Its derivatives	99.0082	100.016	[M-H]-	C4H4O3	A	29787000	24939000	20648000	26544000	29765000	20326000	7102500	11135000	8383000	11416000	7428900	8245900	22354000	18089000	19054000	19677000	17281000	25650000	26376000	20205000	19915000	32483000	26994000	22530000	12030000	7901100	9946600	11703000	10682000	6068500	8110400	6564200	8678600	7327300	8060300	6396300	15972000	19773000	20799000	19666000	18759000
MEDN0655	Hydantoin-5-propionic acid	Organic acid And Its derivatives	Organicacid and Its derivatives	171.041	172.048	[M-H]-	C6H8N2O4	A	9	9	9	9	9	9	9371.3	12760	18090	11388	16066	17414	9	9	9	9	9	9	12725	7701.5	8739	7367	7365.2	2677.3	17073	26905	18749	15738	21102	26460	24445	28166	20084	22783	16408	26799	16295	12264	11644	17747	5539.7
MEDN0678	Ethylsalicylate	Organic acid And Its derivatives	Organicacid and Its derivatives	165.055	166.063	[M-H]-	C9H10O3	A	1162800	1058800	1067100	1075300	814910	735670	789690	1065700	922710	955800	773870	761860	992600	1086000	787310	974730	816250	799700	963470	1065200	895110	1143300	920000	902620	1336600	1176900	885440	970920	1116400	1113000	1123700	1090400	909530	1316200	969090	902890	1011500	1110200	1258900	1244000	1047200
MEDN0689	2,5-Furandicarboxylicacid	Organic acid And Its derivatives	Organicacid and Its derivatives	154.998	156.006	[M-H]-	C6H4O5	A	9	9	9	9	9	9	9	9	9	9	9	9	138220	142890	114590	146610	212770	109950	9	9	9	9	9	9	153690	131910	191570	158960	109850	160810	9	9	9	9	9	9	9	9	9	9	9
MEDN0704	Oxaloacetic acid	Organic acid And Its derivatives	Organicacid and Its derivatives	130.998	132.07	[M-H]-	C4H4O5	A	58091	90930	83038	60405	80216	93132	382390	335320	404360	362970	375810	297560	60331	33652	20476	23174	33785	45310	223130	186080	215340	197680	200800	66257	174540	265680	176600	186950	207240	186820	112870	111560	93500	105630	108320	132090	32649	35540	28641	19207	31640
MEDN0725	2,4-Hexadienoic acid	Organic acid And Its derivatives	Organicacid and Its derivatives	111.045	112.052	[M-H]-	C6H8O2	A	497520	646020	736610	524300	562990	872380	1970200	1335200	1726700	1836800	1836300	1803800	1199700	1233200	1848000	1502900	1839200	1548900	689280	845340	770700	622630	661490	1243700	1303200	1350100	1326500	1368800	1377600	1331400	1202300	968210	1309000	943550	1056800	963490	1267700	1181600	1254000	1224900	1187600
MEDN0741	Methanesulfonic acid	Organic acid And Its derivatives	Sulfonic acids	94.9803	95.9881	[M-H]-	CH4O3S	A	526830	456550	679920	500120	474410	666060	1693700	1904200	1708100	2164800	1890000	1867300	240100	222320	228110	199210	442590	288980	435430	396950	430510	354900	437940	206650	1136300	1984900	1326100	1644200	1485300	1372000	871830	1041400	913820	859470	989210	828180	113110	145750	137180	120000	117090
MEDN0819	3-Hydroxymandelate	Organic acid And Its derivatives	Organicacid and Its derivatives	167.034	168.042	[M-H]-	C8H8O4	A	435150	397560	267450	248150	386800	287220	4114000	2205900	4062800	3745500	4480300	4347000	20983	22237	42773	36175	25645	36622	42128	47554	41169	27896	49482	34162	127210	224940	120310	135640	113990	111310	122600	145710	111240	99999	147150	127500	195310	119250	144540	162640	199590
MEDN0820	3-Hydroxyglutaric acid	Organic acid And Its derivatives	Organicacid and Its derivatives	147.029	148.037	[M-H]-	C5H8O5	A	122610	108990	64396	71454	99822	109690	611510	475440	684360	562790	527190	549230	332300	440580	263330	358140	323920	305370	191080	460300	247830	325630	333590	533180	186700	228230	289560	237110	221460	261150	1156800	1500800	1067600	1150200	1342200	1245600	317130	333630	398830	427400	239670
MEDN0826	3-(3-Hydroxyphenyl)-3-hydroxypropanoic acid	Organic acid And Its derivatives	Organicacid and Its derivatives	181.05	182.058	[M-H]-	C9H10O4	A	9	9	9	9	9	9	236600	163040	218580	262800	259580	314110	9	9	9	9	9	9	9	9	9	9	9	9	9	9	9	9	9	9	9	9	9	9	9	9	9	9	9	9	9
MEDN0827	N-acetylornithine	Organic acid And Its derivatives	Organicacid and Its derivatives	173.093	174.1	[M-H]-	C7H14N2O3	A	23660000	27550000	35305000	25990000	22583000	35490000	142580000	125550000	158160000	143510000	158610000	126920000	25579000	15372000	8238300	16621000	16851000	15574000	48153000	49951000	48642000	38199000	49695000	15253000	74902000	103630000	81230000	71933000	87018000	74573000	31744000	33979000	30416000	34659000	29923000	35729000	18903000	14007000	12897000	11597000	9028100
MEDN0833	3-Dehydroshikimate	Organic acid And Its derivatives	Organicacid and Its derivatives	171.029	172.037	[M-H]-	C7H8O5	A	36537	60873	19698	47076	30350	59422	9	9	9	9	9	9	75271	58681	35036	79738	43422	82386	75764	103660	79873	36887	65978	20905	11819	24282	24423	35967	24323	38450	53082	90760	106560	112930	107060	74480	55397	36475	20133	40762	12763
MEDN0841	3-Ureidopropionate	Organic acid And Its derivatives	Organicacid and Its derivatives	131.046	132.054	[M-H]-	C4H8N2O3	A	107200	70599	103110	109370	120620	119450	12499	11804	16967	15998	16895	16995	219360	100920	47490	74001	201090	338160	15195	11650	8021.1	11127	12125	127400	36160	64817	41380	36602	44300	37941	170560	126630	155410	101560	169970	185080	22794	40058	22474	18010	40662
MEDN0854	Mono-Methyl Glutarate	Organic acid And Its derivatives	Organicacid and Its derivatives	145.05	146.058	[M-H]-	C6H10O4	B	173380	240760	212660	220010	228670	222760	198310	189190	181890	203210	148950	131080	165290	204180	196660	157880	155570	136340	178850	215960	191180	193170	217510	233310	199620	154900	225230	209520	168140	217800	159620	243630	129550	185840	203860	212760	212590	213630	238070	289670	167200
MEDN1005	Phosphoenolpyruvate	Organic acid And Its derivatives	Phosphoric acids	166.975	167.982	[M-H]-	C3H5O6P	A	17725000	43738000	14055000	14730000	24449000	16325000	7228700	8257800	6895600	7442900	6251300	6360900	11090000	10434000	9761400	9138400	13529000	12192000	100550000	74642000	68304000	70971000	67918000	12016000	43648000	33514000	32979000	30290000	33681000	28262000	1921200	1659400	1582600	1530900	1361700	1386200	105360000	95139000	94598000	70909000	72573000
MEDN1006	Uric acid	Organic acid And Its derivatives	Organicacid and Its derivatives	167.021	168.028	[M-H]-	C5H4N4O3	A	10332000	28902000	7375300	8456100	17063000	9148800	3737500	4319300	3479200	3912000	3522000	4007000	8666800	6591000	6778700	5775800	7992100	8711600	63773000	72149000	44045000	45963000	49045000	9609500	17655000	15547000	11975000	12224000	14406000	12595000	677350	730330	669310	470310	658340	574790	99375000	83960000	76425000	57490000	48514000
MEDN1009	3-hydroxyphenylacetic acid	Organic acid And Its derivatives	Organicacid and Its derivatives	151.04	152.047	[M-H]-	C8H8O3	A	9	9	9	9	9	9	18026	23195	26550	25229	22870	23645	9	9	9	9	9	9	33242	45130	33724	38773	52570	40194	16230	65299	40920	31381	52182	25892	9	9	9	9	9	9	30287	12757	79100	21403	30076
MEDN1021	4-Acetamidobutyric Acid	Organic acid And Its derivatives	Organicacid and Its derivatives	144.066	145.074	[M-H]-	C6H11NO3	A	1163100	1549700	1652300	1503300	1701800	1750100	1273900	1473300	1566200	1403300	1495900	1658600	563230	677110	664420	657640	656690	507530	2043600	1814600	1747000	1654900	1693600	811380	145270	241860	220760	189590	194800	214900	675480	695870	627040	595330	605130	614600	284870	232140	235900	257890	203400
MEDN1043	2-(pyridin-3-yl)-1H-benzimidazole	Organic acid And Its derivatives	Organicacid and Its derivatives	389.172	195.08	[2M-H]-	C12H9N3	B	211190	2342900	498040	529320	342360	54187	2915.8	2078.1	4596.6	2498.2	3757.7	9962.3	18740	64613	10859	22314	9581.3	16633	1497000	1415000	1714000	1234300	1790700	21662	52099	21251	37573	67037	29557	35828	12444	18330	13217	20216	35641	15806	3510700	1508100	2026000	3156600	5037200
MEDN1052	(S) -2-Hydroxyglutaric acid	Organic acid And Its derivatives	Organicacid and Its derivatives	147.029	148.037	[M-H]-	C5H8O5	A	390500	225820	155840	156690	243700	316830	3730600	1636000	3790000	1939400	1249500	1568600	765010	933030	608310	546820	560460	673800	713160	858420	621090	804120	739750	1109800	397850	437320	710750	559900	582000	583050	1429800	1388400	1485900	1519500	1565000	1362900	687770	711840	968470	920640	768700
MEDN1063	Homo-Gamma-Linolenic Acid	Organic acid And Its derivatives	Organicacid and Its derivatives	305.248	306.256	[M-H]-	C20H34O2	A	50652	143810	111440	112680	126260	134550	3034600	2820600	3031300	2376200	2816700	3607000	9	9	9	9	9	947.55	85503	101160	67878	102850	70290	9	140870	184590	205760	248770	157710	172620	546350	884060	857010	802450	675950	519320	48079	24949	42736	38927	48617
MEDN1086	Adrenaline	Organic acid And Its derivatives	Organicacid and Its derivatives	331.264	332.272	[M-H]-	C22H36O2	B	9	9	9	9	9	9	9	9	9	9	9	9	9	9	9	9	9	9	9	9	9	9	9	9	9	9	9	9	9	9	28314	18197	47290	38222	28226	31539	9	9	9	9	9
MEDN1093	2-isopropylmalate	Organic acid And Its derivatives	Organicacid and Its derivatives	175.061	176.068	[M-H]-	C7H12O5	B	27722	9203.8	9	14726	31303	27743	12581	9	9	10498	9	9	11365	28167	28031	15226	10552	11394	84592	56395	93482	53519	76773	38776	9	9	9	9	9	9	5297.1	2814.6	10373	4981.6	9	6208.9	23531	15161	23283	13408	13874
MEDN1098	2-ethyl-2-hydroxybutyric acid	Organic acid And Its derivatives	Organicacid and Its derivatives	131.071	132.079	[M-H]-	C6H12O3	A	92676	93946	95710	121360	99906	128450	108170	88009	86083	107580	99465	130550	69516	97815	53600	63426	94971	108460	106650	104690	125870	101610	97159	60024	9	9	9	9	9	9	306670	168890	284970	186240	174570	194060	1541700	228770	124990	103540	172480
MEDN1110	1,11-undecylic acid	Organic acid And Its derivatives	Organicacid and Its derivatives	243.2	244.167	[M-H]-	C13H24O4	A	2161700	2345400	2249700	2222700	2287200	2236600	1931000	1972900	2259800	2029200	2205800	2280900	2202600	2000800	2021600	2117000	2148800	2094000	2075900	2062000	2003200	2131900	2085900	2014400	2147000	2536000	2126100	2174500	2237800	2148500	2559000	2748600	2760100	2742200	2523600	2781400	2816400	2174800	2221600	2151200	2196900
MEDN1133	Butanone acid	Organic acid And Its derivatives	Organicacid and Its derivatives	101.024	102.032	[M-H]-	C4H6O3	A	3524.9	1031.8	1766.1	2528.2	5640.7	2227.1	22451	11875	10462	4880.3	12873	13651	2665	9	4072.6	2665.3	5342.8	2818	13870	9175.4	13648	9406.4	3524	2818.6	17535	12908	10735	9866	10027	12982	14699	8799.5	13015	13015	10157	13796	7162.3	2854.4	9	5484.3	2586.1
MEDN1134	2-Hydroxy-3,5-dinitrobenzoic acid	Organic acid And Its derivatives	Organicacid and Its derivatives	226.994	228.002	[M-H]-	C7H4N2O7	A	74184	85082	60619	95583	61265	76986	77745	75801	68231	50373	79113	62720	79574	79502	76476	87578	90074	60022	37348	59275	71437	64474	76546	68884	79096	66435	87350	64858	55342	70472	74370	46927	55450	38105	79273	87103	57586	67309	66089	68702	53763
MEDN1162	p-Tolyl sulfuric acid	Organic acid And Its derivatives	Sulfonic acids	187.009	188.014	[M-H]-	C7H8O4S	A	51760	105660	9	42747	32438	9	9	9	9	9	9	9	9	9	9	9	9	9	1149500	1115200	747560	1380700	820700	9	9	9	9	9	9	9	9	9	9	9	9	9	9	9	9	9	9
MEDN1226	2-amino-4-oxovaleric acid	Organic acid And Its derivatives	Organicacid and Its derivatives	130.05	131.058	[M-H]-	C5H9NO3	A	2606400	3182100	3382200	3483900	3598800	3962300	1119600	1069400	1235100	920970	1055300	1374100	369260	430920	276050	337010	339700	424160	412170	524590	500060	380930	395200	417260	1519500	2164300	1681800	1519700	2044800	1848900	324100	349710	291430	334760	391320	350710	148090	256440	233270	117340	122130
[truncated: 367 more rows]
[truncated: 29 more columns]
